# Supplementary material for: Overcoming the gender bias in ecology and evolution: is the double-anonymized peer review an effective pathway over time?
Source: PeerJ journal article supplement (doi:10.7717/peerj.15186), 2023-04-10
Supplement: Graphical_Abstract.pdf [file Graphical_Abstract.pdf]

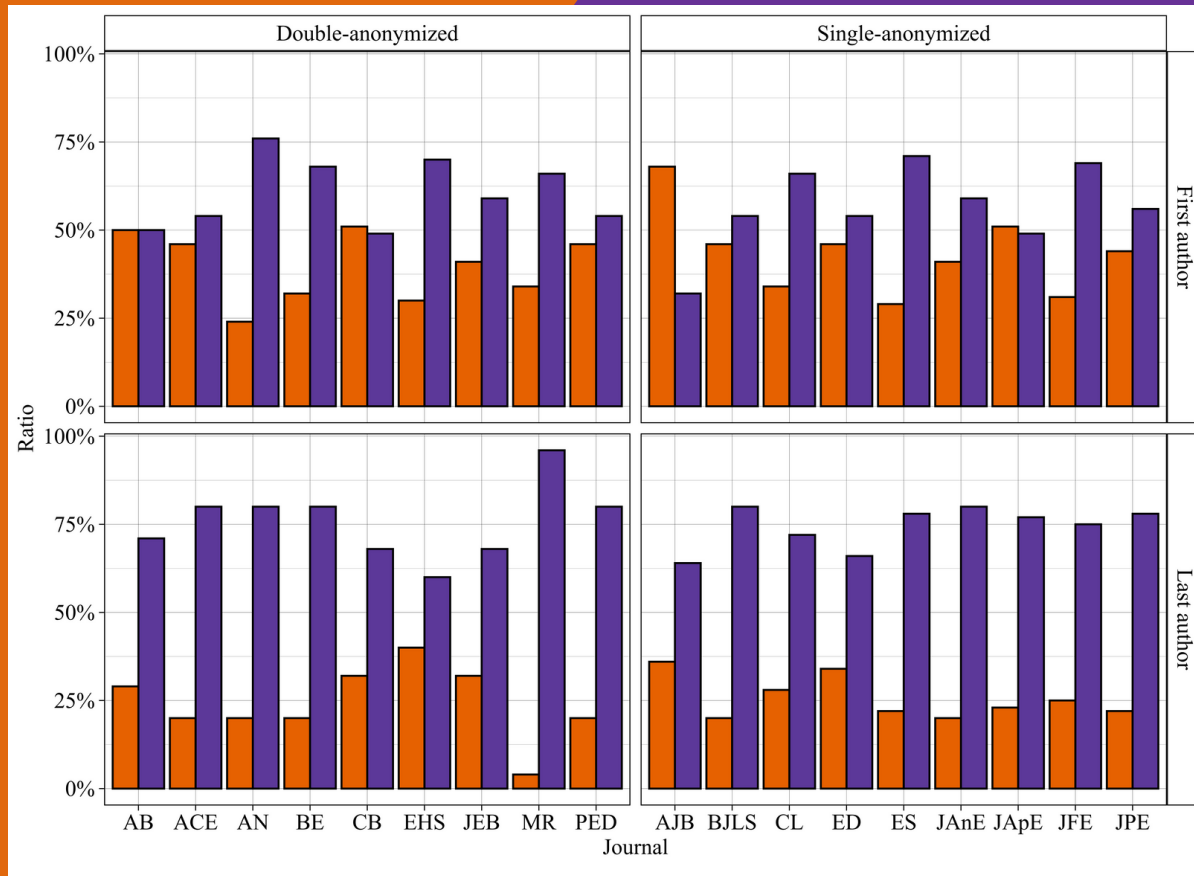

Female Male
