# Supplementary material for: Overcoming the gender bias in ecology and evolution: is the double-anonymized peer review an effective pathway over time?
Source: PeerJ. 2023 Apr 10;11:e15186. doi: 10.7717/peerj.15186 (PMC10100800; doi:10.7717/peerj.15186)
Supplement: Supplemental Information 2 [file peerj-11-15186-s002.xlsx]

## Sheet: Read.me
Metadata: the 142 journals recovered by our first search.
Journals Selected: The 135 selected journals with Ecology, Evolution, and Evolutionary Biology words in their scope.
DA selected: The journals with double-anonymized peer-review policy.
all-SA: all journals with single-anonymized peer-review policy.
Articles_Analysed: all articles included in our analyses.

## Sheet: Metadata
Full_Journal_Title	Impact_Factor	Year_journal_creation
Acta Botanica Brasilica	1.048	1998
ACTA BOTANICA CROATICA	1.051	1925
ACTA ZOOLOGICA	1.375	1920
AMERICAN NATURALIST	3.744	1867
AMPHIBIAN & REPTILE CONSERVATION	1.133	1996
ANIMAL BEHAVIOUR	2.689	1953
ANIMAL BIOLOGY	1.204	1872
ANIMAL CONSERVATION	3.21	1998
ANNALS OF BOTANY	4.005
Annual Review of Ecology Evolution and Systematics	14.041
Annual Review of Plant Biology	19.54	1950
AoB Plants	2.182
APPLIED ANIMAL BEHAVIOUR SCIENCE	2.187	1984
APPLIED ENTOMOLOGY AND ZOOLOGY	1.109	1996
Asian Herpetological Research	1.052
AUK	2.114	1884
AUSTRALIAN JOURNAL OF BOTANY	1.386	1953
Avian Conservation and Ecology	2.541	2005
Avian Research	1.215	2014
BEHAVIORAL ECOLOGY	2.761	1990
BEHAVIORAL ECOLOGY AND SOCIOBIOLOGY	2.277
BIODIVERSITY AND CONSERVATION	2.935	1992
Biodiversity Data Journal	1.331
BioInvasions Records	1.504	2011
BIOLOGIA PLANTARUM	1.601	1959
BIOLOGICAL BULLETIN	1.527	1899
BIOLOGICAL CONSERVATION	4.711	1968
BIOLOGICAL INVASIONS	3.087	2005
BIOLOGICAL JOURNAL OF THE LINNEAN SOCIETY	1.961	1969
BIOLOGICAL REVIEWS	10.701	1935
Biology Letters	2.869	2005
Biology-Basel	3.796
BIOTROPICA	2.09	1969
BIRD CONSERVATION INTERNATIONAL	1.846	1991
BMC BIOLOGY	6.765	2003
BMC ECOLOGY	2.029	2001
BMC EVOLUTIONARY BIOLOGY	3.058	2001
BMC PLANT BIOLOGY	3.497	2001
BMC Zoology	2.115	2016
BOTANICAL JOURNAL OF THE LINNEAN SOCIETY	2.076	1969
BOTANICAL REVIEW	1.667	1935
Botany Letters	1.048	1993
BRAZILIAN JOURNAL OF BIOLOGY	1.266	2000
CARIBBEAN JOURNAL OF SCIENCE	1.583	1961
Conservation & Society	1.904	2003
CONSERVATION BIOLOGY	5.405	1987
CONSERVATION GENETICS	1.917	2000
Conservation Letters	6.766	2008
Current Zoology	2.351	1935
ECOLOGICAL APPLICATIONS	4.248	1991
Ecological Complexity	1.571	2004
ECOLOGICAL ECONOMICS	4.482	1989
ECOLOGICAL ENTOMOLOGY	1.848	1976
ECOLOGICAL INDICATORS	4.229	2001
ECOLOGICAL MODELLING	2.497	1975
ECOLOGICAL MONOGRAPHS	7.722	1931
Ecological Processes	1.642
ECOLOGICAL RESEARCH	1.58	1986
ECOLOGY	4.7	1920
Ecology and Evolution	2.392	2011
ECOLOGY AND SOCIETY	3.89	1997
ECOLOGY LETTERS	8.665	1998
ECOLOGY OF FRESHWATER FISH	1.95	1992
Ecosphere	2.878	2010
Ecosystem Health and Sustainability	2.315	2015
Ecosystem Services	6.33	2012
ECOSYSTEMS	4.207	1998
ENTOMOLOGIA GENERALIS	4.333	1978
ENTOMOLOGICAL SCIENCE	1.074	2003
ENVIRONMENTAL CONSERVATION	2.434	1974
ETHOLOGY ECOLOGY & EVOLUTION	1.022	1967
EUROPEAN JOURNAL OF WILDLIFE RESEARCH	1.381	1955
European Zoological Journal	1.656	1930
EvoDevo	2.146	2010
EVOLUTION	3.698	1947
EVOLUTION & DEVELOPMENT	1.925
Evolution Letters	4.6
Evolutionary Biology	2.013
EVOLUTIONARY ECOLOGY	1.8
Fire Ecology	1.667
FOREST ECOLOGY AND MANAGEMENT	3.17
Forest Ecosystems	2.696
Frontiers in Ecology and Evolution	2.416
FRONTIERS IN ECOLOGY AND THE ENVIRONMENT	9.295
FUNCTIONAL ECOLOGY	4.434	1997
Fungal Ecology	2.656
GLOBAL ECOLOGY AND BIOGEOGRAPHY	6.446	1999
Global Ecology and Conservation	2.526
JOURNAL OF ANIMAL ECOLOGY	4.554
JOURNAL OF APPLIED ECOLOGY	5.84
JOURNAL OF BIOGEOGRAPHY	3.723
JOURNAL OF ECOLOGY	5.762
JOURNAL OF ETHOLOGY	1.4
JOURNAL OF EVOLUTIONARY BIOLOGY	2.72	1988
JOURNAL OF FRESHWATER ECOLOGY	1.239	1998
Journal of Plant Ecology	1.833	2008
Journal of Systematics and Evolution	2.779	2008
JOURNAL OF ZOOLOGICAL SYSTEMATICS AND EVOLUTIONARY RESEARCH	2.159	1963
JOURNAL OF ZOOLOGY	1.724	1830
LANDSCAPE ECOLOGY	3.385	1987
Life Science Alliance	2.622	2018
Life-Basel	2.991	2011
Mammal Research	1.356	2001
MAMMAL REVIEW	2.804	1970
MAMMALIAN BIOLOGY	1.595	2002
MICROBIAL ECOLOGY	3.356	1974
MOLECULAR ECOLOGY	5.163	1992
Molecular Ecology Resources	6.286	2001
Nature Conservation-Bulgaria	1.58	2012
Nature Ecology & Evolution	12.541	2017
NeoBiota	2.643	2011
NEW FORESTS	2.24	1986
NEW PHYTOLOGIST	8.512	1902
OECOLOGIA	2.654	1968
OIKOS	3.37	1973
PeerJ	2.379	2011
Perspectives in Ecology and Conservation	3.563	2003
PERSPECTIVES IN PLANT ECOLOGY EVOLUTION AND SYSTEMATICS	2.54	2001
PLANT ECOLOGY	1.509	1948
Plant Ecology & Diversity	1.196	1991
Plant Ecology and Evolution	1.119	2010
PLOS BIOLOGY	7.076	2003
PLoS One	2.74	2006
SCIENCE	41.845	1880
Scientific Data	5.541	2014
Scientific Reports	3.998	2011
THEORY IN BIOSCIENCES	1.303	2000
TRENDS IN ECOLOGY & EVOLUTION	14.764	1986
TRENDS IN PLANT SCIENCE	14.416	1996
WILDLIFE BIOLOGY	1.258	1994
WILDLIFE MONOGRAPHS	2.222	1958
WILDLIFE RESEARCH	1.669	2012
ZOOLOGICA SCRIPTA	2.603	1972
ZOOLOGICAL JOURNAL OF THE LINNEAN SOCIETY	2.824	1856
Zoological Letters	2.075	2015
ZOOLOGICAL RESEARCH	2.638	1980
ZOOLOGICAL STUDIES	1.257	1962
ZOOLOGISCHER ANZEIGER	1.366	1878
ZOOLOGY	1.681	2001
JOURNAL OF MAMMALOGY	1.891	1919
ECOGRAPHY	6.455	1978
DIVERSITY AND DISTRIBUTIONS	3.993	1998

## Sheet: Journals_selected
Full_Journal_Title	Impact_Factor	DB	Year_DB	Year_journal_creation
Acta Botanica Brasilica	1.048	sb		1998
ACTA BOTANICA CROATICA	1.051	Waiting contact		1925
ACTA ZOOLOGICA	1.375	sb		1920
AMERICAN NATURALIST	3.744	db	2015-01-01	1867
AMPHIBIAN & REPTILE CONSERVATION	1.133	Waiting contact		1996
ANIMAL BEHAVIOUR	2.689	db	2009	1953
ANIMAL BIOLOGY	1.204	sb		1872
ANIMAL CONSERVATION	3.21	sb		1998
ANNALS OF BOTANY	4.005	no
Annual Review of Ecology Evolution and Systematics	14.041	sb
Annual Review of Plant Biology	19.54	no		1950
AoB Plants	2.182	no
APPLIED ANIMAL BEHAVIOUR SCIENCE	2.187	sb		1984
APPLIED ENTOMOLOGY AND ZOOLOGY	1.109	sb		1996
Asian Herpetological Research	1.052	Waiting contact
AUK	2.114	db	2019	1884
AUSTRALIAN JOURNAL OF BOTANY	1.386	sb		1953
Avian Conservation and Ecology	2.541	db	2005	2005
Avian Research	1.215	sb		2014
BEHAVIORAL ECOLOGY	2.761	db	2001	1990
BEHAVIORAL ECOLOGY AND SOCIOBIOLOGY	2.277	sb
BIODIVERSITY AND CONSERVATION	2.935	sb		1992
Biodiversity Data Journal	1.331	sb
BioInvasions Records	1.504	db	2012-01-01	2011
BIOLOGIA PLANTARUM	1.601	sb		1959
BIOLOGICAL BULLETIN	1.527	sb		1899
BIOLOGICAL CONSERVATION	4.711	db	2018	1968
BIOLOGICAL INVASIONS	3.087	sb		2005
BIOLOGICAL JOURNAL OF THE LINNEAN SOCIETY	1.961	sb		1969
BIOLOGICAL REVIEWS	10.701	sb		1935
Biology Letters	2.869	sb		2005
Biology-Basel	3.796	sb
BIOTROPICA	2.09	sb		1969
BIRD CONSERVATION INTERNATIONAL	1.846	sb		1991
BMC BIOLOGY	6.765	sb		2003
BMC ECOLOGY	2.029	sb		2001
BMC EVOLUTIONARY BIOLOGY	3.058	sb		2001
BMC PLANT BIOLOGY	3.497	sb		2001
BMC Zoology	2.115	sb		2016
BOTANICAL JOURNAL OF THE LINNEAN SOCIETY	2.076	sb		1969
BOTANICAL REVIEW	1.667	sb		1935
Botany Letters	1.048	sb		1993
BRAZILIAN JOURNAL OF BIOLOGY	1.266	sb		2000
CARIBBEAN JOURNAL OF SCIENCE	1.583	sb		1961
Conservation & Society	1.904	db	2018	2003
CONSERVATION BIOLOGY	5.405	db	Issue (waiting contact)-2014	1987
CONSERVATION GENETICS	1.917	sb		2000
Conservation Letters	6.766	sb		2008
Current Zoology	2.351	sb		1935
ECOLOGICAL APPLICATIONS	4.248	sb		1991
Ecological Complexity	1.571	sb		2004
ECOLOGICAL ECONOMICS	4.482	sb		1989
ECOLOGICAL ENTOMOLOGY	1.848	sb		1976
ECOLOGICAL INDICATORS	4.229	sb		2001
ECOLOGICAL MODELLING	2.497	sb		1975
ECOLOGICAL MONOGRAPHS	7.722	sb		1931
Ecological Processes	1.642	sb
ECOLOGICAL RESEARCH	1.58	sb		1986
ECOLOGY	4.7	sb		1920
Ecology and Evolution	2.392	sb		2011
ECOLOGY AND SOCIETY	3.89	db	1997	1997
ECOLOGY LETTERS	8.665	sb		1998
ECOLOGY OF FRESHWATER FISH	1.95	sb		1992
Ecosphere	2.878	sb		2010
Ecosystem Health and Sustainability	2.315	db	2015	2015
Ecosystem Services	6.33	db	2019	2012
ECOSYSTEMS	4.207	sb		1998
ENTOMOLOGIA GENERALIS	4.333	Waiting contact		1978
ENTOMOLOGICAL SCIENCE	1.074	sb		2003
ENVIRONMENTAL CONSERVATION	2.434	sb		1974
ETHOLOGY ECOLOGY & EVOLUTION	1.022	sb		1967
EUROPEAN JOURNAL OF WILDLIFE RESEARCH	1.381	sb		1955
European Zoological Journal	1.656	db	Waiting contact	1930
EvoDevo	2.146	sb		2010
EVOLUTION	3.698	db	Waiting contact	1947
EVOLUTION & DEVELOPMENT	1.925	sb
Evolution Letters	4.6	sb
Evolutionary Biology	2.013	sb
EVOLUTIONARY ECOLOGY	1.8	sb
Fire Ecology	1.667	sb
FOREST ECOLOGY AND MANAGEMENT	3.17	sb
Forest Ecosystems	2.696	sb
Frontiers in Ecology and Evolution	2.416	sb
FRONTIERS IN ECOLOGY AND THE ENVIRONMENT	9.295	sb
FUNCTIONAL ECOLOGY	4.434	db/sb (see obs)	sep 2019 (test)	1997
Fungal Ecology	2.656	sb
GLOBAL ECOLOGY AND BIOGEOGRAPHY	6.446	db	2018	1999
Global Ecology and Conservation	2.526	sb
JOURNAL OF ANIMAL ECOLOGY	4.554	sb
JOURNAL OF APPLIED ECOLOGY	5.84	sb
JOURNAL OF BIOGEOGRAPHY	3.723	sb
JOURNAL OF ECOLOGY	5.762	sb
JOURNAL OF ETHOLOGY	1.4	sb
JOURNAL OF EVOLUTIONARY BIOLOGY	2.72	db	2016	1988
JOURNAL OF FRESHWATER ECOLOGY	1.239	sb		1998
Journal of Plant Ecology	1.833	sb		2008
Journal of Systematics and Evolution	2.779	sb		2008
JOURNAL OF ZOOLOGICAL SYSTEMATICS AND EVOLUTIONARY RESEARCH	2.159	sb		1963
JOURNAL OF ZOOLOGY	1.724	sb		1830
LANDSCAPE ECOLOGY	3.385	sb		1987
Mammal Research	1.356	sb		2001
MAMMAL REVIEW	2.804	db	2009	1970
MAMMALIAN BIOLOGY	1.595	sb		2002
MICROBIAL ECOLOGY	3.356	sb		1974
MOLECULAR ECOLOGY	5.163	sb		1992
Molecular Ecology Resources	6.286	sb		2001
Nature Conservation-Bulgaria	1.58	sb		2012
Nature Ecology & Evolution	12.541	sb		2017
NeoBiota	2.643	sb		2011
NEW FORESTS	2.24	sb		1986
NEW PHYTOLOGIST	8.512	sb		1902
OECOLOGIA	2.654	sb		1968
OIKOS	3.37	db	2018	1973
Perspectives in Ecology and Conservation	3.563	sb		2003
PERSPECTIVES IN PLANT ECOLOGY EVOLUTION AND SYSTEMATICS	2.54	sb		2001
PLANT ECOLOGY	1.509	sb		1948
Plant Ecology & Diversity	1.196	db	2008	1991
Plant Ecology and Evolution	1.119	sb		2010
PLOS BIOLOGY	7.076	sb		2003
THEORY IN BIOSCIENCES	1.303	sb		2000
TRENDS IN ECOLOGY & EVOLUTION	14.764	sb		1986
TRENDS IN PLANT SCIENCE	14.416	sb		1996
WILDLIFE BIOLOGY	1.258	db	2018	1994
WILDLIFE MONOGRAPHS	2.222	sb		1958
WILDLIFE RESEARCH	1.669	sb		2012
ZOOLOGICA SCRIPTA	2.603	sb		1972
ZOOLOGICAL JOURNAL OF THE LINNEAN SOCIETY	2.824	db	2018	1856
Zoological Letters	2.075	sb		2015
ZOOLOGICAL RESEARCH	2.638	sb		1980
ZOOLOGICAL STUDIES	1.257	sb		1962
ZOOLOGISCHER ANZEIGER	1.366	sb		1878
ZOOLOGY	1.681	sb		2001
JOURNAL OF MAMMALOGY	1.891	sb		1919
ECOGRAPHY	6.455	sb		1978
DIVERSITY AND DISTRIBUTIONS	3.993	sb		1998

## Sheet: DA-selected
Full_Journal_Title	Impact_Factor	Peer-review	Year_DB	Year_journal_creation
Avian Conservation and Ecology
THE AMERICAN NATURALIST	3.744	db	2005	1867
ANIMAL BEHAVIOUR	2.689	db	2009	1953
Avian Conservation and Ecology	2.541	db	2005	2005
BEHAVIORAL ECOLOGY	2.761	db	2001	1990
Conservation Biology	5.405	db	2014	1987
Ecosystem Health and Sustainability	2.315	db	2015	2015
Journal of Evolutionary Biology	2.72	db	2016	1988
MAMMAL REVIEW	2.804	db	2009	1970
Plant Ecology & Diversity	1.196	db	2008	1991

## Sheet: all-SA
Full_Journal_Title	Impact_Factor	DB	Year_journal_creation	Journal_number
Acta Botanica Brasilica	1.048	sb	1998	1
ACTA ZOOLOGICA	1.375	sb	1920	2
ANIMAL BIOLOGY	1.204	sb	1872	3
ANIMAL CONSERVATION	3.21	sb	1998	4
Annual Review of Ecology Evolution and Systematics	14.041	sb		5
APPLIED ANIMAL BEHAVIOUR SCIENCE	2.187	sb	1984	6
APPLIED ENTOMOLOGY AND ZOOLOGY	1.109	sb	1996	7
AUSTRALIAN JOURNAL OF BOTANY	1.386	sb	1953	8
Avian Research	1.215	sb	2014	9
BEHAVIORAL ECOLOGY AND SOCIOBIOLOGY	2.277	sb		10
BIODIVERSITY AND CONSERVATION	2.935	sb	1992	11
Biodiversity Data Journal	1.331	sb		12
BIOLOGIA PLANTARUM	1.601	sb	1959	13
BIOLOGICAL BULLETIN	1.527	sb	1899	14
BIOLOGICAL INVASIONS	3.087	sb	2005	15
BIOLOGICAL JOURNAL OF THE LINNEAN SOCIETY	1.961	sb	1969	16
BIOLOGICAL REVIEWS	10.701	sb	1935	17
Biology Letters	2.869	sb	2005	18
Biology-Basel	3.796	sb		19
BIOTROPICA	2.09	sb	1969	20
BIRD CONSERVATION INTERNATIONAL	1.846	sb	1991	21
BMC BIOLOGY	6.765	sb	2003	22
BMC ECOLOGY	2.029	sb	2001	23
BMC EVOLUTIONARY BIOLOGY	3.058	sb	2001	24
BMC PLANT BIOLOGY	3.497	sb	2001	25
BMC Zoology	2.115	sb	2016	26
BOTANICAL JOURNAL OF THE LINNEAN SOCIETY	2.076	sb	1969	27
BOTANICAL REVIEW	1.667	sb	1935	28
Botany Letters	1.048	sb	1993	29
BRAZILIAN JOURNAL OF BIOLOGY	1.266	sb	2000	30
CARIBBEAN JOURNAL OF SCIENCE	1.583	sb	1961	31
CONSERVATION GENETICS	1.917	sb	2000	32
Conservation Letters	6.766	sb	2008	33
Current Zoology	2.351	sb	1935	34
DIVERSITY AND DISTRIBUTIONS	3.993	sb	1998	35
ECOGRAPHY	6.455	sb	1978	36
ECOLOGICAL APPLICATIONS	4.248	sb	1991	37
Ecological Complexity	1.571	sb	2004	38
ECOLOGICAL ECONOMICS	4.482	sb	1989	39
ECOLOGICAL ENTOMOLOGY	1.848	sb	1976	40
ECOLOGICAL INDICATORS	4.229	sb	2001	41
ECOLOGICAL MODELLING	2.497	sb	1975	42
ECOLOGICAL MONOGRAPHS	7.722	sb	1931	43
Ecological Processes	1.642	sb		44
ECOLOGICAL RESEARCH	1.58	sb	1986	45
ECOLOGY	4.7	sb	1920	46
Ecology and Evolution	2.392	sb	2011	47
ECOLOGY LETTERS	8.665	sb	1998	48
ECOLOGY OF FRESHWATER FISH	1.95	sb	1992	49
Ecosphere	2.878	sb	2010	50
ECOSYSTEMS	4.207	sb	1998	51
ENTOMOLOGICAL SCIENCE	1.074	sb	2003	52
ENVIRONMENTAL CONSERVATION	2.434	sb	1974	53
ETHOLOGY ECOLOGY & EVOLUTION	1.022	sb	1967	54
EUROPEAN JOURNAL OF WILDLIFE RESEARCH	1.381	sb	1955	55
EvoDevo	2.146	sb	2010	56
EVOLUTION & DEVELOPMENT	1.925	sb		57
Evolution Letters	4.6	sb		58
Evolutionary Biology	2.013	sb		59
EVOLUTIONARY ECOLOGY	1.8	sb		60
Fire Ecology	1.667	sb		61
FOREST ECOLOGY AND MANAGEMENT	3.17	sb		62
Forest Ecosystems	2.696	sb		63
Frontiers in Ecology and Evolution	2.416	sb		64
FRONTIERS IN ECOLOGY AND THE ENVIRONMENT	9.295	sb		65
Fungal Ecology	2.656	sb		66
Global Ecology and Conservation	2.526	sb		67
JOURNAL OF ANIMAL ECOLOGY	4.554	sb		68
JOURNAL OF APPLIED ECOLOGY	5.84	sb		69
JOURNAL OF BIOGEOGRAPHY	3.723	sb		70
JOURNAL OF ECOLOGY	5.762	sb		71
JOURNAL OF ETHOLOGY	1.4	sb		72
JOURNAL OF FRESHWATER ECOLOGY	1.239	sb	1998	73
JOURNAL OF MAMMALOGY	1.891	sb	1919	74
Journal of Plant Ecology	1.833	sb	2008	75
Journal of Systematics and Evolution	2.779	sb	2008	76
JOURNAL OF ZOOLOGICAL SYSTEMATICS AND EVOLUTIONARY RESEARCH	2.159	sb	1963	77
JOURNAL OF ZOOLOGY	1.724	sb	1830	78
LANDSCAPE ECOLOGY	3.385	sb	1987	79
Mammal Research	1.356	sb	2001	80
MAMMALIAN BIOLOGY	1.595	sb	2002	81
MICROBIAL ECOLOGY	3.356	sb	1974	82
MOLECULAR ECOLOGY	5.163	sb	1992	83
Molecular Ecology Resources	6.286	sb	2001	84
Nature Conservation-Bulgaria	1.58	sb	2012	85
Nature Ecology & Evolution	12.541	sb	2017	86
NeoBiota	2.643	sb	2011	87
NEW FORESTS	2.24	sb	1986	88
NEW PHYTOLOGIST	8.512	sb	1902	89
OECOLOGIA	2.654	sb	1968	90
Perspectives in Ecology and Conservation	3.563	sb	2003	91
PERSPECTIVES IN PLANT ECOLOGY EVOLUTION AND SYSTEMATICS	2.54	sb	2001	92
PLANT ECOLOGY	1.509	sb	1948	93
Plant Ecology and Evolution	1.119	sb	2010	94
PLOS BIOLOGY	7.076	sb	2003	95
THEORY IN BIOSCIENCES	1.303	sb	2000	96
TRENDS IN ECOLOGY & EVOLUTION	14.764	sb	1986	97
TRENDS IN PLANT SCIENCE	14.416	sb	1996	98
WILDLIFE MONOGRAPHS	2.222	sb	1958	99
WILDLIFE RESEARCH	1.669	sb	2012	100
ZOOLOGICA SCRIPTA	2.603	sb	1972	101
Zoological Letters	2.075	sb	2015	102
ZOOLOGICAL RESEARCH	2.638	sb	1980	103
ZOOLOGICAL STUDIES	1.257	sb	1962	104
ZOOLOGISCHER ANZEIGER	1.366	sb	1878	105
ZOOLOGY	1.681	sb	2001	106

## Sheet: Articles_Analysed
id+	paper_name	doi	paper_type	author_name	author_order	N_authors	journal	Volume	year_publication	gender	institution	country	continent_filiation	impact_factor	revision_type	revision_year	revision_year_edited	polit_change	revi_type2
LFLL129	Transdisciplinary_Bioblitz:_Rapid_biotic_and_abiotic_inventory_allows_studying_environmental_changes_over_60_years_at_the_Biological_Field_Station_of_Paimpont_(Brittany,_France)_and_opens_new_interdisciplinary_research_opportunities	https://doi.org/10.3897/BDJ.8.e50451	Data_Paper	Annegret_Nicolai	1	65	Biodiversity_Data_Journal	8	2020	female	Université_Rennes_1	France	Europe	1,33	sb	4	-1		sb
LFLL129	Transdisciplinary_Bioblitz:_Rapid_biotic_and_abiotic_inventory_allows_studying_environmental_changes_over_60_years_at_the_Biological_Field_Station_of_Paimpont_(Brittany,_France)_and_opens_new_interdisciplinary_research_opportunities	https://doi.org/10.3897/BDJ.8.e50451	Data_Paper	Régis_Supper	2	65	Biodiversity_Data_Journal	8	2020	male	Université_Rennes_1	France	Europe	1,33	sb	4	-1		sb
CCS548	Weak_effects_of_geolocators_on_small_birds:_A_meta‐analysis_controlled_for_phylogeny_and_publication_bias	https://doi.org/10.1111/1365-2656.12962	Research_article	Petr_Procházka	2	65	Journal_of_Animal_Ecology	89	2020	male	Institute of Vertebrate Biology, The Czech Academy of Sciences, Brno, Czech Republic	Czech Republic	Europe	4.554	sb	4	-1		sb
CCS548	Weak_effects_of_geolocators_on_small_birds:_A_meta‐analysis_controlled_for_phylogeny_and_publication_bias	https://doi.org/10.1111/1365-2656.12962	Research_article	Vojtěch_Brlík	1	65	Journal_of_Animal_Ecology	89	2020	male	Institute of Vertebrate Biology, The Czech Academy of Sciences, Brno, Czech Republic	Czech Republic	Europe	4.554	sb	4	-1		sb
MBS367	Species–area_relationships_in_continuous_vegetation:_Evidence_from_Palaearctic_grasslands	https://doi.org/10.1111/jbi.13697	Original_article	Jürgen_Dengler	1	45	Journal_of_Biogeography	47	2020	male	University_of_Bayreuth	Germany	Europe	3.723	sb	4	-1		sb
MBS367	Species–area_relationships_in_continuous_vegetation:_Evidence_from_Palaearctic_grasslands	https://doi.org/10.1111/jbi.13697	Original_article	Idoia_Biurrun	2	45	Journal_of_Biogeography	47	2020	female	University_of_the_Basque_Country	Spain	Europe	3.723	sb	4	-1		sb
LFLL365	EDITOR'S_CHOICE:_How_much_would_it_cost_to_monitor_farmland_biodiversity_in_Europe?	https://doi.org/10.1111/1365-2664.12552	Research_article	Ilse_R_Geijzendorffer	1	35	Journal_of_Applied_Ecology	53	2016	female	Avignon_Université	France	Europe	5,84	sb	0	-5		sb
LFLL365	EDITOR'S_CHOICE:_How_much_would_it_cost_to_monitor_farmland_biodiversity_in_Europe?	https://doi.org/10.1111/1365-2664.12552	Research_article	Felix_Herzog	2	35	Journal_of_Applied_Ecology	53	2016	male	Institute_for_Sustainability_Sciences	Switzerland	Europe	5,84	sb	0	-5		sb
MBS366	Global_fern_and_lycophyte_richness_explained:_How_regional_and_local_factors_shape_plot_richness	https://doi.org/10.1111/jbi.13782	Original_article	Anna_Weigand	1	35	Journal_of_Biogeography	47	2020	female	University_of_Zurich	Switzerland	Europe	3.723	sb	4	-1		sb
MBS366	Global_fern_and_lycophyte_richness_explained:_How_regional_and_local_factors_shape_plot_richness	https://doi.org/10.1111/jbi.13782	Original_article	Michael_Kessler	2	35	Journal_of_Biogeography	47	2020	male	University_of_Zurich	Switzerland	Europe	3.723	sb	4	-1		sb
LFLL475	Towards_the_development_of_general_rules_describing_landscape_heterogeneity–multifunctionality_relationships	https://doi.org/10.1111/1365-2664.13260	Research_article	Fons_van_der_Plas	1	34	Journal_of_Applied_Ecology	56	2019	male	Senckenberg_Biodiversity_and_Climate_Research_Centre	Germany	Europe	5,84	sb	3	-2		sb
LFLL475	Towards_the_development_of_general_rules_describing_landscape_heterogeneity–multifunctionality_relationships	https://doi.org/10.1111/1365-2664.13260	Research_article	Peter_Manning	2	34	Journal_of_Applied_Ecology	56	2019	male	Senckenberg_Biodiversity_and_Climate_Research_Centre	Germany	Europe	5,84	sb	3	-2		sb
LFLL186	Synergies_between_the_key_biodiversity_area_and_systematic_conservation_planning_approaches	https://doi.org/10.1111/conl.12625	Review	Carlos_A_de_M_Scaramuzza	2	31	Conservation_Letters	12	2019	male	Ministry_of_Environment	Brazil	South_America	6.766	sb	3	-2		sb
LFLL186	Synergies_between_the_key_biodiversity_area_and_systematic_conservation_planning_approaches	https://doi.org/10.1111/conl.12625	Review	Robert_J_Smith	1	31	Conservation_Letters	12	2019	male	University_of_Kent	UK	Europe	6.766	sb	3	-2		sb
MBS347	Functionally_richer_communities_improve_ecosystem_functioning:_Dung_removal_and_secondary_seed_dispersal_by_dung_beetles_in_the_Western_Palaearctic	https://doi.org/10.1111/jbi.13452	Original_article	Tanja_Milotić	1	31	Journal_of_Biogeography	46	2019	female	Ghent_University	Belgium	Europe	3.723	sb	3	-2		sb
MBS347	Functionally_richer_communities_improve_ecosystem_functioning:_Dung_removal_and_secondary_seed_dispersal_by_dung_beetles_in_the_Western_Palaearctic	https://doi.org/10.1111/jbi.13452	Original_article	Maurice_Hoffmann	2	31	Journal_of_Biogeography	46	2019	male	Ghent_University	Belgium	Europe	3.723	sb	3	-2		sb
CCS	Soil physical conditions limit palm and tree basal area in Amazonian forests	10.1080/17550874.2013.772257	Research article	Thaise Emilio	1	30	Botanical_Journal_of_Scotland	7	2014	female	Programa de Pós-Graduação em Ecologia, Instituto Nacional de Pesquisas da Amazônia (INPA) , Manaus , Brasil	Brazil			db	4	4	pos	db
CCS	Soil physical conditions limit palm and tree basal area in Amazonian forests	10.1080/17550874.2013.772257	Research article	Oliver L. Phillips	2	30	Botanical_Journal_of_Scotland	7	2014	male	School of Geography , University of Leeds , Leeds , UK	UK			db	4	4	pos	db
LFLL442	Impacts_of_salvage_logging_on_biodiversity:_A_meta‐analysis	https://doi.org/10.1111/1365-2664.12945	Review	Jörg_Müller	2	29	Journal_of_Applied_Ecology	55	2018	male	University_of_Würzburg	Germany	Europe	5,84	sb	2	-3		sb
LFLL442	Impacts_of_salvage_logging_on_biodiversity:_A_meta‐analysis	https://doi.org/10.1111/1365-2664.12945	Review	Simon_Thorn	1	29	Journal_of_Applied_Ecology	55	2018	male	University_of_Würzburg	Germany	Europe	5,84	sb	2	-3		sb
LFLL484	High_ecosystem_service_delivery_potential_of_small_woodlands_in_agricultural_landscapes	https://doi.org/10.1111/1365-2664.13537	Research_article	Alicia_Valdés	1	28	Journal_of_Applied_Ecology	57	2020	female	Jules_Verne_University_of_Picardie	France	Europe	5,84	sb	4	-1		sb
LFLL484	High_ecosystem_service_delivery_potential_of_small_woodlands_in_agricultural_landscapes	https://doi.org/10.1111/1365-2664.13537	Research_article	Guillaume_Decocq	2	28	Journal_of_Applied_Ecology	57	2020	male	Jules_Verne_University_of_Picardie	France	Europe	5,84	sb	4	-1		sb
LFLL35	Toward_a_new_data_standard_for_combined_marine_biological_and_environmental_datasets_-_expanding_OBIS_beyond_species_occurrences	https://doi.org/10.3897/BDJ.5.e10989	Research_article	Daphnis_De_Pooter	1	27	Biodiversity_Data_Journal	5	2017	male	Flanders_Marine_Institute	Belgium	Europe	1,33	sb	1	-4		sb
LFLL35	Toward_a_new_data_standard_for_combined_marine_biological_and_environmental_datasets_-_expanding_OBIS_beyond_species_occurrences	https://doi.org/10.3897/BDJ.5.e10989	Research_article	Francisco_Hernandez	2	27	Biodiversity_Data_Journal	5	2017	male	Flanders_Marine_Institute	Belgium	Europe	1,33	sb	1	-4		sb
LMDV31	Local_Participation_in_Natural_Resource_Monitoring:_a_Characterization_of_Approaches_	https://doi.org/10.1111/j.1523-1739.2008.01063.xx	Contributed_papers	Deki_Yonten	2	27	Conservation_Biology	23	2009	male	Ministry_of_agriculture	Buthan	Asia	5.405	db	-5	-5	pre	sb
LMDV31	Local_Participation_in_Natural_Resource_Monitoring:_a_Characterization_of_Approaches_	https://doi.org/10.1111/j.1523-1739.2008.01063.xx	Contributed_papers	Finn_danielsen	1	27	Conservation_Biology	23	2009	male	Nordic_Agency_for_development_and_ecology	Denmark	Europe	5.405	db	-5	-5	pre	sb
LFLL441	The_impact_of_even‐aged_and_uneven‐aged_forest_management_on_regional_biodiversity_of_multiple_taxa_in_European_beech_forests	https://doi.org/10.1111/1365-2664.12950	Research_article	Christian_Ammer	2	27	Journal_of_Applied_Ecology	55	2018	male	University_of_Göttingen	Germany	Europe	5,84	sb	2	-3		sb
LFLL441	The_impact_of_even‐aged_and_uneven‐aged_forest_management_on_regional_biodiversity_of_multiple_taxa_in_European_beech_forests	https://doi.org/10.1111/1365-2664.12950	Research_article	Peter_Schall	1	27	Journal_of_Applied_Ecology	55	2018	male	University_of_Göttingen	Germany	Europe	5,84	sb	2	-3		sb
LFLL197	Conserving_European_biodiversity_across_realms	https://doi.org/10.1111/conl.12586	Policy_Perspectives	Ioannis_N_Vogiatzakis	2	26	Conservation_Letters	12	2019	male	Open_University_of_Cyprus	Cyprus	Europe	6.766	sb	3	-2		sb
LFLL197	Conserving_European_biodiversity_across_realms	https://doi.org/10.1111/conl.12586	Policy_Perspectives	Sylvaine_Giakoumi	1	26	Conservation_Letters	12	2019	female	Université_Côte_d'Azur	France	Europe	6.766	sb	3	-2		sb
LFLL314	Variable_levels_of_drift_in_tunicate_cardiopharyngeal_gene_regulatory_elements	https://doi.org/10.1186/s13227-019-0137-2	Research_article	Brad_Davidson	2	26	EvoDevo	10	2019	male	Swarthmore_College	USA	North_America	2.146	sb	3	-2		sb
LFLL314	Variable_levels_of_drift_in_tunicate_cardiopharyngeal_gene_regulatory_elements	https://doi.org/10.1186/s13227-019-0137-2	Research_article	William_Colgan	1	26	EvoDevo	10	2019	male	Broad_Institute	USA	North_America	2.146	sb	3	-2		sb
BSR139	The_climate-smart_village_approach:_framework_of_an_integrative_strategy_for_scaling_up_adaptation_options_in_agriculture	http://dx.doi.org/10.5751/ES-09844-230114	Synthesis	Pramod_K_Aggarwal	1	25	Ecology_and_Society	23	2018	male	CGIAR_Research_Program_on_Climate_Change_Agriculture_and_Food_Security_(CCAFS)	The_Netherlands	Europe	3,89	db	2	2		db
BSR139	The_climate-smart_village_approach:_framework_of_an_integrative_strategy_for_scaling_up_adaptation_options_in_agriculture	http://dx.doi.org/10.5751/ES-09844-230114	Synthesis	Bui_Tan_Yen	2	25	Ecology_and_Society	23	2018	male	CGIAR_Research_Program_on_Climate_Change_Agriculture_and_Food_Security_(CCAFS)	The_Netherlands	Europe	3,89	db	2	2		db
BSR	A 2021 Horizon Scan of Emerging Global Biological Conservation Issues	https://www.cell.com/trends/ecology-evolution/fulltext/S0169-5347(20)30306-2	Review	Ann T	2	25	Trends_in_Ecology_and_Evo	36	2021	female		UK			sb	3			sb
BSR	A 2021 Horizon Scan of Emerging Global Biological Conservation Issues	https://www.cell.com/trends/ecology-evolution/fulltext/S0169-5347(20)30306-2	Review	Willian S	1	25	Trends_in_Ecology_and_Evo	36	2021	male		UK			sb	3			sb
LMDV69	Biodiversity_Differences_between_Managed_and_Unmanaged_Forests:_Meta‐Analysis_of_Species_Richness_in_Europe_	https://doi.org/10.1111/j.1523-1739.2009.01399.x	Review	Risto_Virtanen	2	24	Conservation_Biology	24	2010	male	Cemagref	France	Europe	5.405	db	-4	-4	pre	sb
LMDV69	Biodiversity_Differences_between_Managed_and_Unmanaged_Forests:_Meta‐Analysis_of_Species_Richness_in_Europe_	https://doi.org/10.1111/j.1523-1739.2009.01399.x	Review	Yoan_Paillet	1	24	Conservation_Biology	24	2010	male	Cemagref	France	Europe	5.405	db	-4	-4	pre	sb
BSR137	Biocultural_approaches_to_developing_well-being_indicators_in_Solomon_Islands	http://dx.doi.org/10.5751/ES-09867-230132	Insight	Christopher_E_Filardi	2	24	Ecology_and_Society	23	2018	male	Nia_Tero	USA	North_America	3,89	db	2	2		db
BSR137	Biocultural_approaches_to_developing_well-being_indicators_in_Solomon_Islands	http://dx.doi.org/10.5751/ES-09867-230132	Insight	Joe_McCarter	1	24	Ecology_and_Society	23	2018	male	American_Museum_of_Natural_History	USA	North_America	3,89	db	2	2		db
LMDV568	The_Christmas_tree_project:_comparing_the_effects_of_five_treatments_on_the_health_of_cut_Christmas_trees_(Pinus_radiata,_Pinaceae)	https://doi.org/10.1071/BT14343	Research_article	Julia_Cooke	2	23	Australian_Journal_of_Botany	64	2016	female	Evolution & Ecology Research Centre, School of Biological, Earth and Environmental Sciences, UNSW Australia, NSW 2052, Australia	Australia	Oceania	1.386	sb	0	-5		sb
LMDV568	The_Christmas_tree_project:_comparing_the_effects_of_five_treatments_on_the_health_of_cut_Christmas_trees_(Pinus_radiata,_Pinaceae)	https://doi.org/10.1071/BT14343	Research_article	Olyvea_Akres	1	23	Australian_Journal_of_Botany	64	2016	female	Kambala, 794 New South Head Road, Rose Bay, NSW 2029, Australia	Australia	Oceania	1.386	sb	0	-5		sb
LMDV282	The_city_as_a_refuge_for_insect_pollinators	https://doi.org/10.1111/cobi.12840	Essay	Caragh_Threlfall	2	23	Conservation_Biology	31	2017	male	University_of_Melbourne	Australia	Oceania	5.405	db	1	1	pos	db
LMDV282	The_city_as_a_refuge_for_insect_pollinators	https://doi.org/10.1111/cobi.12840	Essay	Damon_Hall	1	23	Conservation_Biology	31	2017	male	Saint Louis University	USA	North_America	5.405	db	1	1	pos	db
LFLL173	Applying_a_New_Ensemble_Approach_to_Estimating_Stock_Status_of_Marine_Fisheries_around_the_World	https://doi.org/10.1111/conl.12363	Letter	Yimin_Ye	2	23	Conservation_Letters	11	2018	male	Food_and_Agricultural_Organization	Italy	Europe	6.766	sb	2	-3		sb
LFLL173	Applying_a_New_Ensemble_Approach_to_Estimating_Stock_Status_of_Marine_Fisheries_around_the_World	https://doi.org/10.1111/conl.12363	Letter	Andrew_A_Rosenberg	1	23	Conservation_Letters	11	2018	male	Union_of_Concerned_Scientists	USA	North_America	6.766	sb	2	-3		sb
LFLL187	Systematic_planning_can_rapidly_close_the_protection_gap_in_Australian_mammal_havens	https://doi.org/10.1111/conl.12611	Letter	Jeremy_Ringma	1	23	Conservation_Letters	12	2019	male	Royal_Melbourne_Institute_of_Technology	Australia	Oceania	6.766	sb	3	-2		sb
LFLL187	Systematic_planning_can_rapidly_close_the_protection_gap_in_Australian_mammal_havens	https://doi.org/10.1111/conl.12611	Letter	Michael_Bode	2	23	Conservation_Letters	12	2019	male	University_of_Technology	Australia	Oceania	6.766	sb	3	-2		sb
LFLL409	Patterns_and_correlates_of_claims_for_brown_bear_damage_on_a_continental_scale	https://doi.org/10.1111/1365-2664.12708	Research_article	Nuria_Selva	2	23	Journal_of_Applied_Ecology	54	2017	female	Polish_Academy_of_Sciences	Poland	Europe	5,84	sb	1	-4		sb
LFLL409	Patterns_and_correlates_of_claims_for_brown_bear_damage_on_a_continental_scale	https://doi.org/10.1111/1365-2664.12708	Research_article	Carlos_Bautista	1	23	Journal_of_Applied_Ecology	54	2017	male	Polish_Academy_of_Sciences	Poland	Europe	5,84	sb	1	-4		sb
CCS610	Integrating_multiple_data_sources_to_assess_the_distribution_and_abundance_of_bottlenose_dolphins_Tursiops_truncatus_in_Scottish_waters	https://doi.org/10.1111/j.1365-2907.2011.00208.x	Review	Barbara_Cheney	1	23	Mammal_review	43	2013	female	University of Aberdeen, Institute of Biological and Environmental Science, Lighthouse Field Station, Cromarty, IV11 8YJ UK	UK	Europe	2.804	db	2	4	pos	db
CCS610	Integrating_multiple_data_sources_to_assess_the_distribution_and_abundance_of_bottlenose_dolphins_Tursiops_truncatus_in_Scottish_waters	https://doi.org/10.1111/j.1365-2907.2011.00208.x	Review	Ben_Wilson	2	23	Mammal_review	43	2013	male	Scottish Association for Marine Science, Dunstaffnage Marine Laboratory, Oban, Argyll, PA37 1QA UK	UK	Europe	2.804	db	2	4	pos	db
BSR20	How_to_build_science-action_partnerships_for_local_land-use_planning_and_management:_lessons_from_Durban,_South_Africa	https://www.ecologyandsociety.org/vol21/iss1/art28/	Research_article	Jessica_Cockburn	1	22	Ecology_and_Society	21	2016	female	University_of_KwaZulu-Natal	South_Africa	Africa	3,89	db	0	0		db
BSR20	How_to_build_science-action_partnerships_for_local_land-use_planning_and_management:_lessons_from_Durban,_South_Africa	https://www.ecologyandsociety.org/vol21/iss1/art28/	Research_article	Sandi_Willows-Munro	2	22	Ecology_and_Society	21	2016	female	University_of_KwaZulu-Natal	South_Africa	Africa	3,89	db	0	0		db
MBS83	On_the_combined_effect_of_soil_fertility_and_topography_on_tree_growth_in_subtropical_forest_ecosystems—a_study_from_SE_China	https://doi.org/10.1093/jpe/rtw065	Research_article	Karsten_Schmidt	2	22	Journal_of_Plant_Ecology	10	2017	male	University_of_Tubingen	Germany	Europe	1.833	sb	1	-4		sb
MBS83	On_the_combined_effect_of_soil_fertility_and_topography_on_tree_growth_in_subtropical_forest_ecosystems—a_study_from_SE_China	https://doi.org/10.1093/jpe/rtw065	Research_article	Thomas_Scholten	1	22	Journal_of_Plant_Ecology	10	2017	male	University_of_Tubingen	Germany	Europe	1.833	sb	1	-4		sb
LFLL99	A_large-scale_species_level_dated_angiosperm_phylogeny_for_evolutionary_and_ecological_analyses	https://doi.org/10.3897/BDJ.8.e39677	Research_article	Olivier_Hardy	2	21	Biodiversity_Data_Journal	8	2020	male	Université_Libre_de_Bruxelles	Belgium	Europe	1,33	sb	4	-1		sb
LFLL99	A_large-scale_species_level_dated_angiosperm_phylogeny_for_evolutionary_and_ecological_analyses	https://doi.org/10.3897/BDJ.8.e39677	Research_article	Steven_Janssens	1	21	Biodiversity_Data_Journal	8	2020	male	Botanic_Garden_Meise	Belgium	Europe	1,33	sb	4	-1		sb
CCS	Spatial patterns of above-ground structure, biomass and composition in a network of six Andean elevation transects	10.1080/17550874.2013.820806	Research article	Cécile A.J. Girardin	1	21	Botanical_Journal_of_Scotland	7	2014	female	Environmental Change Institute, School of Geography and the Environment, University of Oxford , Oxford , UK	UK			db	4	4	pos	db
CCS	The productivity, metabolism and carbon cycle of two lowland tropical forest plots in south-western Amazonia, Peru	10.1080/17550874.2013.820805	Research article	Yadvinder Malhi	1	21	Botanical_Journal_of_Scotland	7	2014	male	Environmental Change Institute, School of Geography and the Environment, University of Oxford , Oxford , UK	UK			db	4	4	pos	db
CCS	The productivity, metabolism and carbon cycle of two lowland tropical forest plots in south-western Amazonia, Peru	10.1080/17550874.2013.820805	Research article	Oliver L. Phillips	2	21	Botanical_Journal_of_Scotland	7	2014	male	Department of Geography , University of Leeds , Leeds , UK	UK			db	4	4	pos	db
CCS	Spatial patterns of above-ground structure, biomass and composition in a network of six Andean elevation transects	10.1080/17550874.2013.820806	Research article	Yadvinder Malhi	2	21	Botanical_Journal_of_Scotland	7	2014	male	Environmental Change Institute, School of Geography and the Environment, University of Oxford , Oxford , UK	UK			db	4	4	pos	db
LMDV109	Establishing_IUCN_Red_List_Criteria_for_Threatened_Ecosystems_	https://doi.org/10.1111/j.1523-1739.2010.01598.x	Essay	Tara_Zamin	2	21	Conservation_Biology	25	2011	female	Queen's University	Canada	North_America	5.405	db	-3	-3	pre	sb
LMDV109	Establishing_IUCN_Red_List_Criteria_for_Threatened_Ecosystems_	https://doi.org/10.1111/j.1523-1739.2010.01598.x	Essay	John_Paul_Rodriguez	1	21	Conservation_Biology	25	2011	male	Instituto Venezolano de Investigaciones Científicas	Venezuela	South_America	5.405	db	-3	-3	pre	sb
BSR559	The_Motus_Wildlife_Tracking_System:_a_collaborative_research_network_to_enhance_the_understanding_of_wildlife_movement	http://dx.doi.org/10.5751/ACE-00953-120108	Methods	Bradley_K._Woodworth	2	20	Avian_Conservation_and_Ecology	12	2017	male	Acadia_University	Canada	North_America	2.541	db	1	1		db
BSR559	The_Motus_Wildlife_Tracking_System:_a_collaborative_research_network_to_enhance_the_understanding_of_wildlife_movement	http://dx.doi.org/10.5751/ACE-00953-120108	Methods	Philip_D._Taylor	1	20	Avian_Conservation_and_Ecology	12	2017	male	Acadia_University	Canada	North_America	2.541	db	1	1		db
LFLL88	Developing_a_vocabulary_and_ontology_for_modeling_insect_natural_history_data:_example_data,_use_cases,_and_competency_questions	https://doi.org/10.3897/BDJ.7.e33303	Short_communication	Brian_Stucky	1	20	Biodiversity_Data_Journal	7	2019	male	Florida_Museum_of_Natural_History	USA	North_America	1,33	sb	3	-2		sb
LFLL88	Developing_a_vocabulary_and_ontology_for_modeling_insect_natural_history_data:_example_data,_use_cases,_and_competency_questions	https://doi.org/10.3897/BDJ.7.e33303	Short_communication	Rob_Guralnick	2	20	Biodiversity_Data_Journal	7	2019	male	Florida_Museum_of_Natural_History	USA	North_America	1,33	sb	3	-2		sb
LFLL111	Craspedotropis_gretathunbergae,_a_new_species_of_Cyclophoridae_(Gastropoda:_Caenogastropoda),_discovered_and_described_on_a_field_course_to_Kuala_Belalong_rainforest,_Brunei	https://doi.org/10.3897/BDJ.8.e47484	Article	Iva_Njunjić	2	20	Biodiversity_Data_Journal	8	2020	female	Naturalis_Biodiversity_Center	The_Netherlands	Europe	1,33	sb	4	-1		sb
LFLL111	Craspedotropis_gretathunbergae,_a_new_species_of_Cyclophoridae_(Gastropoda:_Caenogastropoda),_discovered_and_described_on_a_field_course_to_Kuala_Belalong_rainforest,_Brunei	https://doi.org/10.3897/BDJ.8.e47484	Article	Menno_Schilthuizen	1	20	Biodiversity_Data_Journal	8	2020	male	Naturalis_Biodiversity_Center	The_Netherlands	Europe	1,33	sb	4	-1		sb
CCS	Seasonal production, allocation and cycling of carbon in two mid-elevation tropical montane forest plots in the Peruvian Andes	10.1080/17550874.2013.819042	Research article	Walter Huaraca Huasco	1	20	Botanical_Journal_of_Scotland	7	2014	male	Universidad Nacional de San Antonio Abad del Cusco , Cusco , Peru	Peru			db	4	4	pos	db
CCS	Productivity and carbon allocation in a tropical montane cloud forest in the Peruvian Andes	10.1080/17550874.2013.820222	Research article	Cécile A.J. Girardin	1	20	Botanical_Journal_of_Scotland	7	2014	female	Oxford University Centre for the Environment , Oxford University , Oxford , UK	UK			db	4	4	pos	db
CCS	Productivity and carbon allocation in a tropical montane cloud forest in the Peruvian Andes	10.1080/17550874.2013.820222	Research article	Yadvinder Malhi	2	20	Botanical_Journal_of_Scotland	7	2014	male	School of Geography and the Environment , University of Oxford , Oxford , UK	UK			db	4	4	pos	db
CCS	Seasonal production, allocation and cycling of carbon in two mid-elevation tropical montane forest plots in the Peruvian Andes	10.1080/17550874.2013.819042	Research article	Yadvinder Malhi	2	20	Botanical_Journal_of_Scotland	7	2014	male	Environmental Change Institute , University of Oxford , Oxford , UK	UK			db	4	4	pos	db
LMDV67	Neglect_of_Genetic_Diversity_in_Implementation_of_the_Convention_on_Biological_Diversity	https://doi.org/10.1111/j.1523-1739.2009.01425.x	Conservation_Practice_and_Policy	Linda_Laikre	1	20	Conservation_Biology	24	2010	female	Stockholm_University	Sweden	Europe	5.405	db	-4	-4	pre	sb
LMDV67	Neglect_of_Genetic_Diversity_in_Implementation_of_the_Convention_on_Biological_Diversity	https://doi.org/10.1111/j.1523-1739.2009.01425.xx	Conservation_Practice_and_Policy	Robin_S_Waples	2	20	Conservation_Biology	24	2010	male	Northwest_Fisheries_Science_Center	USA	North_America	5.405	db	-4	-4	pre	sb
CCS545	Estimates_for_energy_expenditure_in_free‐living_animals_using_acceleration_proxies:_A_reappraisal	https://doi.org/10.1111/1365-2656.13040	Research_article	Emily_L_C_Shepard	2	20	Journal_of_Animal_Ecology	89	2020	female	Department of Biosciences, Swansea University, Swansea, UK	UK	Europe	4.554	sb	4	-1		sb
CCS547	Optimizing_the_use_of_biologgers_for_movement_ecology_research	https://doi.org/10.1111/1365-2656.13094	Research_article	Hannah_J_Williams	1	20	Journal_of_Animal_Ecology	89	2020	female	Department of Biosciences, College of Science, Swansea University, Swansea, UK	UK	Europe	4.554	sb	4	-1		sb
CCS545	Estimates_for_energy_expenditure_in_free‐living_animals_using_acceleration_proxies:_A_reappraisal	https://doi.org/10.1111/1365-2656.13040	Research_article	Rory_P_Wilson	1	20	Journal_of_Animal_Ecology	89	2020	male	Department of Biosciences, Swansea University, Swansea, UK	UK	Europe	4.554	sb	4	-1		sb
CCS547	Optimizing_the_use_of_biologgers_for_movement_ecology_research	https://doi.org/10.1111/1365-2656.13094	Research_article	Luca_Börger	2	20	Journal_of_Animal_Ecology	89	2020	male	Department of Biosciences, College of Science, Swansea University, Swansea, UK	UK	Europe	4.554	sb	4	-1		sb
LFLL424	Integrating_invasive_species_policies_across_ornamental_horticulture_supply_chains_to_prevent_plant_invasions	https://doi.org/10.1111/1365-2664.12953	Policy_Direction	Philip_E_Hulme	1	20	Journal_of_Applied_Ecology	55	2018	male	Lincoln_University	New_Zealand	Oceania	5,84	sb	2	-3		sb
LFLL424	Integrating_invasive_species_policies_across_ornamental_horticulture_supply_chains_to_prevent_plant_invasions	https://doi.org/10.1111/1365-2664.12953	Policy_Direction	Laura_NH_Verbrugge	2	20	Journal_of_Applied_Ecology	55	2018	female	Radboud_University	The_Netherlands	Europe	5,84	sb	2	-3		sb
BSR	Investigating Biotic Interactions in Deep Time	https://www.cell.com/trends/ecology-evolution/fulltext/S0169-5347(20)30250-0	Review	Danielle F	1	20	Trends_in_Ecology_and_Evo	36	2021	female		Canada			sb	3			sb
BSR	Investigating Biotic Interactions in Deep Time	https://www.cell.com/trends/ecology-evolution/fulltext/S0169-5347(20)30250-0	Review	Katheleen Lyons	2	20	Trends_in_Ecology_and_Evo	36	2021	female		USA			sb	3			sb
MBS286	Vertical_stratification_of_moths_across_elevation_and_latitude	https://doi.org/10.1111/jbi.12616	Original_article	Louise_A_Ashton	1	19	Journal_of_Biogeography	43	2016	female	Griffith_University	Australia	Oceania	3.723	sb	0	-5		sb
MBS286	Vertical_stratification_of_moths_across_elevation_and_latitude	https://doi.org/10.1111/jbi.12616	Original_article	Roger_L_Kitching	2	19	Journal_of_Biogeography	43	2016	male	Griffith_University	Australia	Oceania	3.723	sb	0	-5		sb
BSR67	Using_an_agent-based_model_to_examine_forest_management_outcomes_in_a_fire-prone_landscape_in_Oregon,_USA	http://dx.doi.org/10.5751/ES-08841-220125	Research_article	Blair_Csuti	2	18	Ecology_and_Society	22	2017	male	Oregon_State_University	USA	North_America	3,89	db	1	1		db
BSR67	Using_an_agent-based_model_to_examine_forest_management_outcomes_in_a_fire-prone_landscape_in_Oregon,_USA	http://dx.doi.org/10.5751/ES-08841-220125	Research_article	Thomas_A._Spies	1	18	Ecology_and_Society	22	2017	male	USDA_Forest_Service_Pacific_Northwest_Research_Station	USA	North_America	3,89	db	1	1		db
CCS549	Light‐level_geolocator_analyses:_A_user's_guide	https://doi.org/10.1111/1365-2656.13036	Research_article	Simeon_Lisovski	1	18	Journal_of_Animal_Ecology	89	2020	male	Department of Bird Migration, Swiss Ornithological Institute, Sempach, Switzerland	Switzerland	Europe	4.554	sb	4	-1		sb
CCS549	Light‐level_geolocator_analyses:_A_user's_guide	https://doi.org/10.1111/1365-2656.13036	Research_article	Eli_S_Bridge	2	18	Journal_of_Animal_Ecology	89	2020	male	Oklahoma Biological Survey, University of Oklahoma, Norman, Oklahoma, USA	USA	North_America	4.554	sb	4	-1		sb
MBS59	Following_the_edge_of_the_flood:_use_of_shallow-water_habitat_by_larval_silver_carp_Hypophthalmichthys_molitrix_in_the_upper_Mississippi_river_system	https://doi.org/10.1080/02705060.2020.1742809	Research_article	Eric_J_Gittinger	2	18	Journal_of_Freshwater_Ecology	35	2020	male	University_of_Illinois	USA	North_America	1.239	sb	4	-1		sb
MBS59	Following_the_edge_of_the_flood:_use_of_shallow-water_habitat_by_larval_silver_carp_Hypophthalmichthys_molitrix_in_the_upper_Mississippi_river_system	https://doi.org/10.1080/02705060.2020.1742809	Research_article	John_H_Chick	1	18	Journal_of_Freshwater_Ecology	35	2020	male	University_of_Illinois	USA	North_America	1.239	sb	4	-1		sb
BSR	Global trends in aquatic animal tracking with acoustic telemetry	https://www.cell.com/trends/ecology-evolution/fulltext/S0169-5347(21)00247-0	Review	Jordan M	1	18	Trends_in_Ecology_and_Evo	37	2022	male		Canada			sb	4			sb
BSR	Global trends in aquatic animal tracking with acoustic telemetry	https://www.cell.com/trends/ecology-evolution/fulltext/S0169-5347(21)00247-0	Review	Aaron F	2	18	Trends_in_Ecology_and_Evo	37	2022	male		Canada			sb	4			sb
CCS	The productivity, allocation and cycling of carbon in forests at the dry margin of the Amazon forest in Bolivia	10.1080/17550874.2013.798364	Research article	Alejandro Araujo-Murakami	1	17	Botanical_Journal_of_Scotland	7	2014	male	Museo de Historia Natural Noel Kempff Mercado , Universidad Autónoma Gabriel René Moreno , Santa Cruz , Bolivia	Bolivia			db	4	4	pos	db
CCS	Basin-wide variations in Amazon forest nitrogen-cycling characteristics as inferred from plant and soil 15N:14N measurements	10.1080/17550874.2013.807524	Research article	Gabriela B. Nardoto	1	17	Botanical_Journal_of_Scotland	7	2014	female	Faculdade UnB Planaltina , Universidade de Brasília , Brasília , Brasil	Brazil			db	4	4	pos	db
CCS	Basin-wide variations in Amazon forest nitrogen-cycling characteristics as inferred from plant and soil 15N:14N measurements	10.1080/17550874.2013.807524	Research article	Luiz A. Martinelli	2	17	Botanical_Journal_of_Scotland	7	2014	male	Centro de Energia Nuclear na Agricultura, Universidade de São Paulo , Piracicaba , Brasil	Brazil			db	4	4	pos	db
CCS	The productivity, allocation and cycling of carbon in forests at the dry margin of the Amazon forest in Bolivia	10.1080/17550874.2013.798364	Research article	Yadvinder Malhi	2	17	Botanical_Journal_of_Scotland	7	2014	male	Environmental Change Institute, School of Geography and the Environment, University of Oxford , Oxford , UK	UK			db	4	4	pos	db
LMDV80	Ecosystem_Services_as_a_Common_Language_for_Coastal_Ecosystem‐Based_Management_	https://doi.org/10.1111/j.1523-1739.2009.01355.xx	Contributed_papers	Eric_Wolanski	2	17	Conservation_Biology	24	2010	male	James_Cook_University_&_Australian_Institute_of_Marine_Science	Australia	North_America	5.405	db	-4	-4	pre	sb
LMDV80	Ecosystem_Services_as_a_Common_Language_for_Coastal_Ecosystem‐Based_Management_	https://doi.org/10.1111/j.1523-1739.2009.01355.xx	Contributed_papers	Elise_F_Granek	1	17	Conservation_Biology	24	2010	female	Portland_State_University	USA	North_America	5.405	db	-4	-4	pre	sb
LFLL131	Projecting_Global_Biodiversity_Indicators_under_Future_Development_Scenarios	https://doi.org/10.1111/conl.12159	Letter	Carlo_Rondinini	2	17	Conservation_Letters	9	2016	male	Sapienza_University_of_Rome	Italy	Europe	6.766	sb	0	-5		sb
LFLL131	Projecting_Global_Biodiversity_Indicators_under_Future_Development_Scenarios	https://doi.org/10.1111/conl.12159	Letter	Piero_Visconti	1	17	Conservation_Letters	9	2016	male	Microsoft_Research_Computational_Science_Laboratory	UK	Europe	6.766	sb	0	-5		sb
LFLL176	Preventing_Global_Extinction_of_the_Javan_Rhino:_Tsunami_Risk_and_Future_Conservation_Direction	https://doi.org/10.1111/conl.12366	Letter	Ridwan_Setiawan	1	17	Conservation_Letters	11	2018	male	WWF_Indonesia	Indonesia	Asia	6.766	sb	2	-3		sb
LFLL176	Preventing_Global_Extinction_of_the_Javan_Rhino:_Tsunami_Risk_and_Future_Conservation_Direction	https://doi.org/10.1111/conl.12366	Letter	Sunarto_Sunarto	2	17	Conservation_Letters	11	2018	male	WWF_Indonesia	Indonesia	Asia	6.766	sb	2	-3		sb
BSR13	Endangered_species_management_and_ecosystem_restoration:_finding_the_common_ground	http://dx.doi.org/10.5751/ES-08134-210119	Research_article	and_John_Takekawa	2	17	Ecology_and_Society	21	2016	male	National_Audubon_Society	USA	North_America	3,89	db	0	0		db
BSR13	Endangered_species_management_and_ecosystem_restoration:_finding_the_common_ground	http://dx.doi.org/10.5751/ES-08134-210119	Research_article	Michael_L_Casazza	1	17	Ecology_and_Society	21	2016	male	U.S._Geological_Survey	USA	North_America	3,89	db	0	0		db
BSR89	Regime_shifts_and_panarchies_in_regional_scale_social-ecological_water_systems	http://dx.doi.org/10.5751/ES-08879-220131	Synthesis	Dagmar_Llewellyn	2	17	Ecology_and_Society	22	2017	female	University_of_New_Mexico	USA	North_America	3,89	db	1	1		db
BSR89	Regime_shifts_and_panarchies_in_regional_scale_social-ecological_water_systems	http://dx.doi.org/10.5751/ES-08879-220131	Synthesis	Lance_Gunderson	1	17	Ecology_and_Society	22	2017	male	Emory_University	USA	North_America	3,89	db	1	1		db
BSR133	Ecosystem_services,_social_interdependencies,_and_collective_action:_a_conceptual_framework	http://dx.doi.org/10.5751/ES-09848-230115	Insight	Cecile_Barnaud	1	17	Ecology_and_Society	23	2018	female	Université_de_Toulouse	France	Europe	3,89	db	2	2		db
BSR133	Ecosystem_services,_social_interdependencies,_and_collective_action:_a_conceptual_framework	http://dx.doi.org/10.5751/ES-09848-230115	Insight	Martine_Antona	2	17	Ecology_and_Society	23	2018	female	CIRAD	France	Europe	3,89	db	2	2		db
BSR	Data Integration for Large-Scale Models of Species Distributions	https://www.cell.com/trends/ecology-evolution/fulltext/S0169-5347(19)30255-1	Review	Robert O'hara	2	17	Trends_in_Ecology_and_Evo	35	2020	male		Norway			sb	2			sb
BSR	Data Integration for Large-Scale Models of Species Distributions	https://www.cell.com/trends/ecology-evolution/fulltext/S0169-5347(19)30255-1	Review	Nick J.B. Isaac	1	17	Trends_in_Ecology_and_Evo	35	2020	male		UK			sb	2			sb
BSR631	Toward_actionable,_coproduced_research_on_boreal_birds_focused_on_building_respectful_partnerships	http://dx.doi.org/10.5751/ACE-01589-150126	Essay	Alana_R._Westwood	1	16	Avian_Conservation_and_Ecology	15	2020	female	University_of_Alberta	Canada	North_America	2.541	db	4	4		db
BSR631	Toward_actionable,_coproduced_research_on_boreal_birds_focused_on_building_respectful_partnerships	http://dx.doi.org/10.5751/ACE-01589-150126	Essay	Darroch_M._Whitaker	2	16	Avian_Conservation_and_Ecology	15	2020	male	Parks_Canada	Canada	North_America	2.541	db	4	4		db
LFLL87	Connecting_data_and_expertise:_a_new_alliance_for_biodiversity_knowledge	https://doi.org/10.3897/BDJ.7.e33679	Forum	John_Wieczorek	2	16	Biodiversity_Data_Journal	7	2019	male	VertNet	Argentina	South_America	1,33	sb	3	-2		sb
LFLL87	Connecting_data_and_expertise:_a_new_alliance_for_biodiversity_knowledge	https://doi.org/10.3897/BDJ.7.e33679	Forum	Donald_Hobern	1	16	Biodiversity_Data_Journal	7	2019	male	Global_Biodiversity_Information_Facility_Secretariat	Denmark	Europe	1,33	sb	3	-2		sb
LFLL73	A_new_species_of_Clavicornaltica_(Coleoptera:_Chrysomelidae),_discovered_and_described_on_a_field_course_to_Kuala_Belalong,_Brunei	https://doi.org/10.3897/BDJ.7.e32555	Article	Iva_Njunjić	2	16	Biodiversity_Data_Journal	7	2019	female	Naturalis_Biodiversity_Center	The_Netherlands	Europe	1,33	sb	3	-2		sb
LFLL73	A_new_species_of_Clavicornaltica_(Coleoptera:_Chrysomelidae),_discovered_and_described_on_a_field_course_to_Kuala_Belalong,_Brunei	https://doi.org/10.3897/BDJ.7.e32555	Article	Menno_Schilthuizen	1	16	Biodiversity_Data_Journal	7	2019	male	Naturalis_Biodiversity_Center	The_Netherlands	Europe	1,33	sb	3	-2		sb
LFLL106	A_new_parasitoid_wasp,_Aphaereta_vondelparkensis_sp._n._(Braconidae,_Alysiinae),_from_a_city_park_in_the_centre_of_Amsterdam	https://doi.org/10.3897/BDJ.8.e49017	Article	Joris_Koene	2	16	Biodiversity_Data_Journal	8	2020	male	Vrije_Universiteit	The_Netherlands	Europe	1,33	sb	4	-1		sb
LFLL106	A_new_parasitoid_wasp,_Aphaereta_vondelparkensis_sp._n._(Braconidae,_Alysiinae),_from_a_city_park_in_the_centre_of_Amsterdam	https://doi.org/10.3897/BDJ.8.e49017	Article	Kees_van_Achterberg	1	16	Biodiversity_Data_Journal	8	2020	male	Naturalis_Biodiversity_Centre	The_Netherlands	Europe	1,33	sb	4	-1		sb
LMDV286	Mainstreaming_the_social_sciences_in_conservation	https://doi.org/10.1111/cobi.12788	contributed_papers	Nathan_J._Bennett	1	16	Conservation_Biology	31	2017	male	University of British Columbia	Canada	North_America	5.405	db	1	1	pos	db
LMDV284	Applying_the_dark_diversity_concept_to_nature_conservation	https://doi.org/10.1111/cobi.12723	Essay	Rob_J_Lewis	1	16	Conservation_Biology	31	2017	male	University of Tartu	Estonia	Europe	5.405	db	1	1	pos	db
LMDV284	Applying_the_dark_diversity_concept_to_nature_conservation	https://doi.org/10.1111/cobi.12723	Essay	Meelis_Partel	2	16	Conservation_Biology	31	2017	male	University of Tartu	Estonia	Europe	5.405	db	1	1	pos	db
LMDV286	Mainstreaming_the_social_sciences_in_conservation	https://doi.org/10.1111/cobi.12788	contributed_papers	Diogo_Verissimo	2	16	Conservation_Biology	31	2017	male	Rare	USA	North_America	5.405	db	1	1	pos	db
CCS	The integration and application of genomic information in mangrove conservation	https://doi.org/10.1111/cobi.13140	Diversity	Alison K.S. Wee	1	16	Conservation_Biology	33	2019	female		China			db	3	3	pos	db
CCS	The integration and application of genomic information in mangrove conservation	https://doi.org/10.1111/cobi.13141	Diversity	Tadashi Kajita	2	16	Conservation_Biology	33	2019	male		Japan			db	3	3	pos	db
LFLL182	Ecosystem‐Based_Fisheries_Management_for_Social–Ecological_Systems:_Renewing_the_Focus_in_the_United_States_with_Next_Generation_Fishery_Ecosystem_Plans	https://doi.org/10.1111/conl.12367	Policy_Perspectives	Anthony_DM_Smith	2	16	Conservation_Letters	11	2018	male	CSIRO_Oceans_and_Atmosphere	Australia	Oceania	6.766	sb	2	-3		sb
LFLL182	Ecosystem‐Based_Fisheries_Management_for_Social–Ecological_Systems:_Renewing_the_Focus_in_the_United_States_with_Next_Generation_Fishery_Ecosystem_Plans	https://doi.org/10.1111/conl.12367	Policy_Perspectives	Kristin_N_Marshall	1	16	Conservation_Letters	11	2018	female	University_of_Washington	USA	North_America	6.766	sb	2	-3		sb
BSR	Energy Flow Through Marine Ecosystems: Confronting Transfer Efficiency	https://www.cell.com/trends/ecology-evolution/fulltext/S0169-5347(20)30257-3	Review	Reg Watson	2	16	Trends_in_Ecology_and_Evo	36	2021	male		Australia			sb	3			sb
BSR	Energy Flow Through Marine Ecosystems: Confronting Transfer Efficiency	https://www.cell.com/trends/ecology-evolution/fulltext/S0169-5347(20)30257-3	Review	Tyler E	1	16	Trends_in_Ecology_and_Evo	36	2021	male		USA			sb	3			sb
LFLL95	Standardised_inventories_of_spiders_(Arachnida,_Araneae)_of_Macaronesia_II:_The_native_forests_and_dry_habitats_of_Madeira_archipelago_(Madeira_and_Porto_Santo_islands)	https://doi.org/10.3897/BDJ.8.e47502	Data_Paper	Jagoba_Malumbres-Olarte	1	15	Biodiversity_Data_Journal	8	2020	male	Universidade_dos_Açores	Portugal	Europe	1,33	sb	4	-1		sb
LFLL95	Standardised_inventories_of_spiders_(Arachnida,_Araneae)_of_Macaronesia_II:_The_native_forests_and_dry_habitats_of_Madeira_archipelago_(Madeira_and_Porto_Santo_islands)	https://doi.org/10.3897/BDJ.8.e47502	Data_Paper	Paulo_Borges	2	15	Biodiversity_Data_Journal	8	2020	male	Universidade_dos_Açores	Portugal	Europe	1,33	sb	4	-1		sb
LFLL184	License_to_Kill?—Disease_Eradication_Programs_May_Not_be_in_Line_with_the_Convention_on_Biological_Diversity	https://doi.org/10.1111/conl.12370	Policy_Perspectives	Axel_Hochkirch	1	15	Conservation_Letters	11	2018	male	Universität_Trier	Germany	Europe	6.766	sb	2	-3		sb
LFLL184	License_to_Kill?—Disease_Eradication_Programs_May_Not_be_in_Line_with_the_Convention_on_Biological_Diversity	https://doi.org/10.1111/conl.12370	Policy_Perspectives	Michael_Veith	2	15	Conservation_Letters	11	2018	male	Universität_Trier	Germany	Europe	6.766	sb	2	-3		sb
LFLL194	Restoring_to_the_future:_Environmental,_cultural,_and_management_trade‐offs_in_historical_versus_hybrid_restoration_of_a_highly_modified_ecosystem	https://doi.org/10.1111/conl.12606	Letter	Kimberly_M_Burnett	1	15	Conservation_Letters	12	2019	female	University_of_Hawai'i_Economic_Research_Organization	USA	North_America	6.766	sb	3	-2		sb
LFLL194	Restoring_to_the_future:_Environmental,_cultural,_and_management_trade‐offs_in_historical_versus_hybrid_restoration_of_a_highly_modified_ecosystem	https://doi.org/10.1111/conl.12606	Letter	Kawika_B_Winter	2	15	Conservation_Letters	12	2019	male	University_of_Hawai'i	USA	North_America	6.766	sb	3	-2		sb
BSR58	Key_features_for_more_successful_place-based_sustainability_research_on_social-ecological_systems:_a_Programme_on_Ecosystem_Change_and_Society_(PECS)_perspective	http://dx.doi.org/10.5751/ES-08826-220114	Research_article	Patricia_Balvanera	1	15	Ecology_and_Society	22	2017	female	Universidad_Nacional_Autónoma_de_México	Mexico	North_America	3,89	db	1	1		db
BSR58	Key_features_for_more_successful_place-based_sustainability_research_on_social-ecological_systems:_a_Programme_on_Ecosystem_Change_and_Society_(PECS)_perspective	http://dx.doi.org/10.5751/ES-08826-220114	Research_article	Gustavo_Perez-Verdin	2	15	Ecology_and_Society	22	2017	male	CIIDIR_Durango	Mexico	North_America	3,89	db	1	1		db
LFLL453	Marine_mammals_and_sonar:_Dose‐response_studies,_the_risk‐disturbance_hypothesis_and_the_role_of_exposure_context	https://doi.org/10.1111/1365-2664.12955	Review	Catriona_M_Harris	1	15	Journal_of_Applied_Ecology	55	2018	female	University_of_Saint_Andrews	UK	Europe	5,84	sb	2	-3		sb
LFLL453	Marine_mammals_and_sonar:_Dose‐response_studies,_the_risk‐disturbance_hypothesis_and_the_role_of_exposure_context	https://doi.org/10.1111/1365-2664.12955	Review	Vincent_M_Janik	2	15	Journal_of_Applied_Ecology	55	2018	male	University_of_Saint_Andrews	UK	Europe	5,84	sb	2	-3		sb
CCS	Genomically correlated trait combinations and antagonistic selection contributing to counterintuitive genetic patterns of adaptive diapause divergence in Rhagoletis flies	/doi/10.1111/jeb.13952	Research_Paper	Jeffrey L. Feder	1	15	Journal_of_evolutionary_biology	35	2022	male	Department of Biological Sciences, University of Notre Dame, Notre Dame, Indiana, USA	USA	North_America	2.541	db	4		pos	db
CCS	Genomically correlated trait combinations and antagonistic selection contributing to counterintuitive genetic patterns of adaptive diapause divergence in Rhagoletis flies	/doi/10.1111/jeb.13952	Research_Paper	Gregory J Ragland	2	15	Journal_of_evolutionary_biology	35	2022	male	Department of Biological Sciences, University of Notre Dame, Notre Dame, Indiana, USA	USA	North_America	2.541	db	4		pos	db
BSR	On Multifaceted Definitions of Multilevel Societies: Response to Papageorgiou and Farine	https://www.cell.com/trends/ecology-evolution/fulltext/S0169-5347(20)30304-9	Letter	Cyril C. Grueter,	1	15	Trends_in_Ecology_and_Evo	36	2021	male		Australia			sb	3			sb
BSR	Embracing Colonizations: A New Paradigm for Species Association Dynamics	https://www.cell.com/trends/ecology-evolution/fulltext/S0169-5347(17)30264-1	Opinion	Soren Nylin	1	15	Trends_in_Ecology_and_Evo	33	2018	male	Department of Zoology, Stockholm University, Stockholm, Sweden	Sweden	Europe		sb	0			sb
BSR	Embracing Colonizations: A New Paradigm for Species Association Dynamics	https://www.cell.com/trends/ecology-evolution/fulltext/S0169-5347(17)30264-1	Opinion	Niklas Janz	2	15	Trends_in_Ecology_and_Evo	33	2018	male	Department of Zoology, Stockholm University, Stockholm, Sweden	Sweden	Europe		sb	0			sb
BSR	On Multifaceted Definitions of Multilevel Societies: Response to Papageorgiou and Farine	https://www.cell.com/trends/ecology-evolution/fulltext/S0169-5347(20)30304-9	Letter	Larissa S	2	15	Trends_in_Ecology_and_Evo	36	2021	female		USA			sb	3			sb
BSR620	Updating_the_distribution_of_the_Sierra_Madre_Sparrow_Xenospiza_baileyi_across_central_Mexico:_historical_records,_new_localities,_and_conservation_perspectives	http://dx.doi.org/10.5751/ACE-01573-150115	Research_article	Luis_A._Sánchez-González	2	14	Avian_Conservation_and_Ecology	15	2020	male	Universidad_Nacional_Autónoma_de_México	Mexico	North_America	2.541	db	4	4		db
BSR620	Updating_the_distribution_of_the_Sierra_Madre_Sparrow_Xenospiza_baileyi_across_central_Mexico:_historical_records,_new_localities,_and_conservation_perspectives	http://dx.doi.org/10.5751/ACE-01573-150115	Research_article	Rubén_Ortega-Álvarez	1	14	Avian_Conservation_and_Ecology	15	2020	male	Universidad_Nacional_Autónoma_de_México	Mexico	North_America	2.541	db	4	4		db
LFLL121	Standardised_spider_(Arachnida,_Araneae)_inventory_of_Lammi,_Finland	https://doi.org/10.3897/BDJ.8.e50775	Data_Paper	Arttu_Soukainen	1	14	Biodiversity_Data_Journal	8	2020	male	University_of_Helsinki	Finland	Europe	1,33	sb	4	-1		sb
LFLL121	Standardised_spider_(Arachnida,_Araneae)_inventory_of_Lammi,_Finland	https://doi.org/10.3897/BDJ.8.e50775	Data_Paper	Pedro_Cardoso	2	14	Biodiversity_Data_Journal	8	2020	male	University_of_Helsinki	Finland	Europe	1,33	sb	4	-1		sb
CCS	Vertical distance from drainage drives floristic composition changes in an Amazonian rainforest	10.1080/17550874.2013.783642	Research article	Juliana Schietti	1	14	Botanical_Journal_of_Scotland	7	2014	female	Programa de Pós-Graduação em Ecologia, Instituto Nacional de Pesquisas da Amazônia – INPA , Manaus , Brazil	Brazil			db	4	4	pos	db
CCS	Vertical distance from drainage drives floristic composition changes in an Amazonian rainforest	10.1080/17550874.2013.783642	Research article	William E. Magnusson	2	14	Botanical_Journal_of_Scotland	7	2014	male	Coordenação de Pesquisa em Biodiversidade, Instituto Nacional de Pesquisas da Amazônia – INPA , Manaus , Brazil	Brazil			db	4	4	pos	db
CCS	The seasonal cycle of productivity, metabolism and carbon dynamics in a wet aseasonal forest in north-west Amazonia (Iquitos, Peru)	10.1080/17550874.2013.798365	Research article	Jhon del Aguila-Pasquel	1	14	Botanical_Journal_of_Scotland	7	2014	male	Universidad Nacional de la Amazonia Peruana , Iquitos , Peru ; Instituto de Investigaciones de la Amazonia Peruana , Iquitos , Peru	Peru			db	4	4	pos	db
CCS	The seasonal cycle of productivity, metabolism and carbon dynamics in a wet aseasonal forest in north-west Amazonia (Iquitos, Peru)	10.1080/17550874.2013.798365	Research article	Yadvinder Malhi	2	14	Botanical_Journal_of_Scotland	7	2014	male	Environmental Change Institute, School of Geography and the Environment, University of Oxford , Oxford , UK	UK			db	4	4	pos	db
LMDV171	Detecting_Insect_Pollinator_Declines_on_Regional_and_Global_Scales	https://doi.org/10.1111/j.1523-1739.2012.01962.x	Contributed_papers	Gretchen_Lebuhn	1	14	Conservation_Biology	27	2013	female	San Francisco State University	USA	North_America	5.405	db	-1	-1	pre	sb
LMDV171	Detecting_Insect_Pollinator_Declines_on_Regional_and_Global_Scales	https://doi.org/10.1111/j.1523-1739.2012.01962.x	Contributed_papers	Frank_Parker	2	14	Conservation_Biology	27	2013	male	Utah State University	USA	North_America	5.405	db	-1	-1	pre	sb
LFLL189	Time_series_analysis_reveals_synchrony_and_asynchrony_between_conflict_management_effort_and_increasing_large_grazing_bird_populations_in_northern_Europe	https://doi.org/10.1111/conl.12450	Letter	Jeremy_J_Cusack	1	14	Conservation_Letters	12	2019	male	University_of_Stirling	UK	Europe	6.766	sb	3	-2		sb
LFLL189	Time_series_analysis_reveals_synchrony_and_asynchrony_between_conflict_management_effort_and_increasing_large_grazing_bird_populations_in_northern_Europe	https://doi.org/10.1111/conl.12450	Letter	Nils_Bunnefeld	2	14	Conservation_Letters	12	2019	male	University_of_Stirling	UK	Europe	6.766	sb	3	-2		sb
LFLL250	Outflow_tract_septation_and_the_aortic_arch_system_in_reptiles:_lessons_for_understanding_the_mammalian_heart	https://doi.org/10.1186/s13227-017-0072-z	Research_article	Michael_K_Richardson	2	14	EvoDevo	8	2017	male	University_of_Leiden	The_Netherlands	Europe	2.146	sb	1	-4		sb
LFLL250	Outflow_tract_septation_and_the_aortic_arch_system_in_reptiles:_lessons_for_understanding_the_mammalian_heart	https://doi.org/10.1186/s13227-017-0072-z	Research_article	Robert_E_Poelmann	1	14	EvoDevo	8	2017	male	Leiden_University_Medical_Center	The_Netherlands	Europe	2.146	sb	1	-4		sb
CCS448	How_many_routes_lead_to_migration?_Comparison_of_methods_to_assess_and_characterize_migratory_movements	https://doi.org/10.1111/1365-2656.12449	Research_article	Francesca_Cagnacci	1	14	Journal_of_Animal_Ecology	85	2016	female	Research and Innovation Centre, Fondazione Edmund Mach, Via Mach 1, 38010 San Michele all'Adige, TN, Italy	Italy	Europe	4.554	sb	0	-5		sb
CCS448	How_many_routes_lead_to_migration?_Comparison_of_methods_to_assess_and_characterize_migratory_movements	https://doi.org/10.1111/1365-2656.12449	Research_article	Mark_Hebblewhite	2	14	Journal_of_Animal_Ecology	85	2016	male	Research and Innovation Centre, Fondazione Edmund Mach, Via Mach 1, 38010 San Michele all'Adige, TN, Italy	Italy	Europe	4.554	sb	0	-5		sb
LFLL432	Biodiversity_change_is_uncoupled_from_species_richness_trends:_Consequences_for_conservation_and_monitoring	https://doi.org/10.1111/1365-2664.12959	Research_article	Alexey_B_Ryabov	2	14	Journal_of_Applied_Ecology	55	2018	male	University_Oldenburg	Germany	Europe	5,84	sb	2	-3		sb
LFLL432	Biodiversity_change_is_uncoupled_from_species_richness_trends:_Consequences_for_conservation_and_monitoring	https://doi.org/10.1111/1365-2664.12959	Research_article	Helmut_Hillebrand	1	14	Journal_of_Applied_Ecology	55	2018	male	University_Oldenburg	Germany	Europe	5,84	sb	2	-3		sb
CCS	Shifting dynamics of climate-functional groups in old-growth Amazonian forests	10.1080/17550874.2012.715210	Research article	Nathalie Butt	1	13	Botanical_Journal_of_Scotland	7	2014	female	Oxford University School of Geography and the Environment , Oxford , UK ; School of Biological Sciences , University of Queensland , Brisbane , Australia	Australia			db	4	4	pos	db
CCS	Disequilibrium and hyperdynamic tree turnover at the forest–cerrado transition zone in southern Amazonia	10.1080/17550874.2013.818072	Research article	Beatriz S. Marimon	1	13	Botanical_Journal_of_Scotland	7	2014	female	Universidade do Estado de Mato Grosso, Departamento de Ciências Biológicas , Nova Xavantina , Brasil	Brazil			db	4	4	pos	db
CCS	Ecosystem respiration and net primary productivity after 8–10 years of experimental through-fall reduction in an eastern Amazon forest	10.1080/17550874.2013.798366	Research article	Antonio C.L. da Costa	1	13	Botanical_Journal_of_Scotland	7	2014	male	Universidade Federal do Pará , Belem , Pará , Brazil	Brazil			db	4	4	pos	db
CCS	Ecosystem respiration and net primary productivity after 8–10 years of experimental through-fall reduction in an eastern Amazon forest	10.1080/17550874.2013.798366	Research article	Yadvinder Malhi	2	13	Botanical_Journal_of_Scotland	7	2014	male	Environmental Change Institute, School of Geography and the Environment , University of Oxford , Oxford , UK	UK			db	4	4	pos	db
CCS	The production, allocation and cycling of carbon in a forest on fertile terra preta soil in eastern Amazonia compared with a forest on adjacent infertile soil	10.1080/17550874.2013.798367	Research article	Christopher E. Doughty	1	13	Botanical_Journal_of_Scotland	7	2014	male	Environmental Change Institute, University of Oxford , Oxford , UK	UK			db	4	4	pos	db
CCS	The production, allocation and cycling of carbon in a forest on fertile terra preta soil in eastern Amazonia compared with a forest on adjacent infertile soil	10.1080/17550874.2013.798367	Research article	Yadvinder Malhi	2	13	Botanical_Journal_of_Scotland	7	2014	male	Environmental Change Institute, University of Oxford , Oxford , UK	UK			db	4	4	pos	db
CCS	Shifting dynamics of climate-functional groups in old-growth Amazonian forests	10.1080/17550874.2012.715210	Research article	Oliver L. Phillips	2	13	Botanical_Journal_of_Scotland	7	2014	male	Earth and Biosphere Institute, School of Geography, University of Leeds , UK	UK			db	4	4	pos	db
CCS	Disequilibrium and hyperdynamic tree turnover at the forest–cerrado transition zone in southern Amazonia	10.1080/17550874.2013.818072	Research article	Oliver L. Phillips	2	13	Botanical_Journal_of_Scotland	7	2014	male	School of Geography , University of Leeds , Leeds , UK	UK			db	4	4	pos	db
LMDV95	Underestimating_Risks_to_the_Northern_Spotted_Owl_in_Fire‐Prone_Forests:_Response_to_Hanson_et_al.	https://doi.org/10.1111/j.1523-1739.2009.01414.x	Commentary	Melinda_Moeur	2	13	Conservation_Biology	24	2010	female	Department_of_Agriculture_Forest_Service	USA	North_America	5.405	db	-4	-4	pre	sb
LMDV95	Underestimating_Risks_to_the_Northern_Spotted_Owl_in_Fire‐Prone_Forests:_Response_to_Hanson_et_al.	https://doi.org/10.1111/j.1523-1739.2009.01414.x	Commentary	Thomas_A_Spies	1	13	Conservation_Biology	24	2010	male	Pacific_Northwest_Research_Station	USA	North_America	5.405	db	-4	-4	pre	sb
LMDV161	nhancing_Conservation,_Ecosystem_Services,_and_Local_Livelihoods_through_a_Wildlife_Premium_Mechanism	https://doi.org/10.1111/j.1523-1739.2012.01959.x	Conservation_Practice_and_Policy	Dirk_Joldersma	2	13	Conservation_Biology	27	2013	male	World Bank Group	USA	North_America	5.405	db	-1	-1	pre	sb
LMDV161	nhancing_Conservation,_Ecosystem_Services,_and_Local_Livelihoods_through_a_Wildlife_Premium_Mechanism	https://doi.org/10.1111/j.1523-1739.2012.01959.x	Conservation_Practice_and_Policy	Eric_Dinerstein	1	13	Conservation_Biology	27	2013	male	World Wildlife Fund	USA	North_America	5.405	db	-1	-1	pre	sb
LFLL200	Is_there_an_elephant_in_the_room?_A_response_to_Batavia_et_al	https://doi.org/10.1111/conl.12603	Correspondence	Amy_J_Dickman	1	13	Conservation_Letters	12	2019	female	University_of_Oxford	UK	Europe	6.766	sb	3	-2		sb
LFLL200	Is_there_an_elephant_in_the_room?_A_response_to_Batavia_et_al	https://doi.org/10.1111/conl.12603	Correspondence	David_W_Macdonald	2	13	Conservation_Letters	12	2019	male	University_of_Oxford	UK	Europe	6.766	sb	3	-2		sb
LFLL190	Tracking_trends_in_the_extinction_risk_of_wild_relatives_of_domesticated_species_to_assess_progress_against_global_biodiversity_targets	https://doi.org/10.1111/conl.12588	Letter	Philip_JK_McGowan	1	13	Conservation_Letters	12	2019	male	Newcastle_University	UK	Europe	6.766	sb	3	-2		sb
LFLL190	Tracking_trends_in_the_extinction_risk_of_wild_relatives_of_domesticated_species_to_assess_progress_against_global_biodiversity_targets	https://doi.org/10.1111/conl.12588	Letter	Stuart_HM_Butchart	2	13	Conservation_Letters	12	2019	male	BirdLife_International	UK	Europe	6.766	sb	3	-2		sb
BSR104	Systematic_evaluation_of_scenario_assessments_supporting_sustainable_integrated_natural_resources_management:_evidence_from_four_case_studies_in_Africa	http://dx.doi.org/10.5751/ES-09728-230105	Research_article	Ariane_Walz	2	13	Ecology_and_Society	23	2018	female	University_of_Potsdam	Germany	Europe	3,89	db	2	2		db
BSR104	Systematic_evaluation_of_scenario_assessments_supporting_sustainable_integrated_natural_resources_management:_evidence_from_four_case_studies_in_Africa	http://dx.doi.org/10.5751/ES-09728-230105	Research_article	Julia_Reinhardt	1	13	Ecology_and_Society	23	2018	female	Potsdam_Institute_for_Climate_Impact_Research_(PIK)	Germany	Europe	3,89	db	2	2		db
LFLL269	Developmental_constraint_through_negative_pleiotropy_in_the_zygomatic_arch	https://doi.org/10.1186/s13227-018-0092-3	Research_article	Benedikt_Hallgrímsson	2	13	EvoDevo	9	2018	male	University_of_Calgary	Canada	North_America	2.146	sb	2	-3		sb
LFLL269	Developmental_constraint_through_negative_pleiotropy_in_the_zygomatic_arch	https://doi.org/10.1186/s13227-018-0092-3	Research_article	Christopher_J_Percival	1	13	EvoDevo	9	2018	male	Stony_Brook_University	USA	North_America	2.146	sb	2	-3		sb
CCS543	Fear_of_the_dark?_Contrasting_impacts_of_humans_versus_lynx_on_diel_activity_of_roe_deer_across_Europe	https://doi.org/10.1111/1365-2656.13161	Research_article	A_J_Mark_Hewison	2	13	Journal_of_Animal_Ecology	89	2020	male	CEFS, Université de Toulouse, INRA, Castanet‐Tolosan, France	France	Europe	4.554	sb	4	-1		sb
CCS543	Fear_of_the_dark?_Contrasting_impacts_of_humans_versus_lynx_on_diel_activity_of_roe_deer_across_Europe	https://doi.org/10.1111/1365-2656.13161	Research_article	Nadège_C_Bonnot	1	13	Journal_of_Animal_Ecology	89	2020	female	Department of Ecology, Swedish University of Agricultural Sciences, Riddarhyttan, Sweden	Sweden	Europe	4.554	sb	4	-1		sb
MBS348	Migratory_birds_as_vehicles_for_parasite_dispersal?_Infection_by_avian_haemosporidians_over_the_year_and_throughout_the_range_of_a_long‐distance_migrant	https://doi.org/10.1111/jbi.13453	Original_article	Carlos_Daniel_Cadena	2	13	Journal_of_Biogeography	46	2019	male	Universidad_de_Los_Andes	Colombia	South_America	3.723	sb	3	-2		sb
MBS348	Migratory_birds_as_vehicles_for_parasite_dispersal?_Infection_by_avian_haemosporidians_over_the_year_and_throughout_the_range_of_a_long‐distance_migrant	https://doi.org/10.1111/jbi.13453	Original_article	Paulo_C_Pulgarín‐R	1	13	Journal_of_Biogeography	46	2019	male	Universidad_de_Los_Andes	Colombia	South_America	3.723	sb	3	-2		sb
MBS362	Macroecology_in_the_age_of_Big_Data_–_Where_to_go_from_here?	https://doi.org/10.1111/jbi.13633	Original_article	Dirk_Nikolaus_Karger	2	13	Journal_of_Biogeography	47	2020	male	Swiss_Federal_Research_Institute	Switzerland	Europe	3.723	sb	4	-1		sb
MBS362	Macroecology_in_the_age_of_Big_Data_–_Where_to_go_from_here?	https://doi.org/10.1111/jbi.13633	Original_article	Rafael_O_Wüest	1	13	Journal_of_Biogeography	47	2020	male	Swiss_Federal_Research_Institute	Switzerland	Europe	3.723	sb	4	-1		sb
MBS89	Impact_of_tree_diversity_and_environmental_conditions_on_the_survival_of_shrub_species_in_a_forest_biodiversity_experiment_in_subtropical_China	https://doi.org/10.1093/jpe/rtw099	Research_article	Bo_Yang	1	13	Journal_of_Plant_Ecology	10	2017	male	Martin_Luther_University_Halle-Wittenberg	Germany	Europe	1.833	sb	1	-4		sb
MBS89	Impact_of_tree_diversity_and_environmental_conditions_on_the_survival_of_shrub_species_in_a_forest_biodiversity_experiment_in_subtropical_China	https://doi.org/10.1093/jpe/rtw099	Research_article	Helge_Bruelheide	2	13	Journal_of_Plant_Ecology	10	2017	male	Martin_Luther_University_Halle-Wittenberg	Germany	Europe	1.833	sb	1	-4		sb
BSR	Scenarios and Models to Support Global Conservation Targets	https://www.cell.com/trends/ecology-evolution/fulltext/S0169-5347(18)30251-9	Review	Emily Nicholson	1	13	Trends_in_Ecology_and_Evo	34	2019	female	Deakin University, School of Life and Environmental Sciences, Centre for Integrative Ecology, Geelong, VIC, Australia	Australia			sb	1			sb
BSR	Environmental Protection Requires Accurate Application of Scientific Evidence	https://www.cell.com/trends/ecology-evolution/fulltext/S0169-5347(20)30313-X	Letter	Diva A	2	13	Trends_in_Ecology_and_Evo	36	2021	female		UK			sb	3			sb
BSR	Scenarios and Models to Support Global Conservation Targets	https://www.cell.com/trends/ecology-evolution/fulltext/S0169-5347(18)30251-9	Review	Simon Ferrier	2	13	Trends_in_Ecology_and_Evo	34	2019	male	CSIRO Land and Water, Canberra, ACT, Australia	USA			sb	1			sb
BSR	Environmental Protection Requires Accurate Application of Scientific Evidence	https://www.cell.com/trends/ecology-evolution/fulltext/S0169-5347(20)30313-X	Letter	Craig S	1	13	Trends_in_Ecology_and_Evo	36	2021	male		USA			sb	3			sb
BSR539	Assessing_range-wide_habitat_suitability_for_the_Lesser_Prairie-Chicken	http://dx.doi.org/10.5751/ACE-00807-110102	Research_article	Catherine_S._Jarnevich	1	12	Avian_Conservation_and_Ecology	11	2016	female	U.S._Geological_Survey	USA	North_America	2.541	db	0	0		db
BSR539	Assessing_range-wide_habitat_suitability_for_the_Lesser_Prairie-Chicken	http://dx.doi.org/10.5751/ACE-00807-110102	Research_article	William_E._Van_Pelt	2	12	Avian_Conservation_and_Ecology	11	2016	male	Arizona_Game_and_Fish_Department	USA	North_America	2.541	db	0	0		db
MBS167	Large-scale_phylogeographic_study_of_the_cosmopolitan_aphid_pest_Brachycaudus_helichrysi_reveals_host_plant_associated_lineages_that_evolved_in_allopatry	https://doi.org/10.1111/bij.12869	Research_article	Emmanuelle_Jousselin	2	12	Biological_Journal_Of_The_Linnean_Society	120	2017	female	Institut_National_de_la_Recherche_Agronomique	France	Europe	1,96	sb	1	-4		sb
MBS167	Large-scale_phylogeographic_study_of_the_cosmopolitan_aphid_pest_Brachycaudus_helichrysi_reveals_host_plant_associated_lineages_that_evolved_in_allopatry	https://doi.org/10.1111/bij.12869	Research_article	Megan_Popkin	1	12	Biological_Journal_Of_The_Linnean_Society	120	2017	female	Institut_National_de_la_Recherche_Agronomique	France	Europe	1,96	sb	1	-4		sb
BSR	Residence times of woody biomass in tropical forests	https://www.tandfonline.com/doi/full/10.1080/17550874.2013.770578	Article	Jon Lloyd	2	12	Botanical_Journal_of_Scotland	6	2013	male		Australia	Americas	2.64	db	3	3	pos	db
BSR	Residence times of woody biomass in tropical forests	https://www.tandfonline.com/doi/full/10.1080/17550874.2013.770578	Article	David Galbraith	1	12	Botanical_Journal_of_Scotland	6	2013	male		UK	Europe	2.64	db	3	3	pos	db
LMDV52	Developing_an_Ocean_Ethic:_Science,_Utility,_Aesthetics,_Self‐Interest,_and_Different_Ways_of_Knowing	https://doi.org/10.1111/j.1523-1739.2008.01057.x	Diversity	Polita_Glynn	2	12	Conservation_Biology	23	2009	female	Pew_Fellows_Program_in_Marine_Conservation	USA	North_America	5.405	db	-5	-5	pre	sb
LMDV52	Developing_an_Ocean_Ethic:_Science,_Utility,_Aesthetics,_Self‐Interest,_and_Different_Ways_of_Knowing	https://doi.org/10.1111/j.1523-1739.2008.01057.x	Diversity	Peter_J_Auster	1	12	Conservation_Biology	23	2009	male	University_of_Connecticut	USA	North_America	5.405	db	-5	-5	pre	sb
CCS	Applying science to pressing conservation needs for penguins	https://doi.org/10.1111/cobi.13378	Essay	Barbara Wienecke	2	12	Conservation_Biology	34	2020	female		Australia			db	4	4	pos	db
CCS	Applying science to pressing conservation needs for penguins	https://doi.org/10.1111/cobi.13378	Essay	P. D. Boersma	1	12	Conservation_Biology	34	2020	female		USA			db	4	4	pos	db
LFLL206	Conservation_risk_of_Batrachochytrium_salamandrivorans_to_endemic_lungless_salamanders	https://doi.org/10.1111/conl.12675	Letter	Edward_Davis_Carter	1	12	Conservation_Letters	13	2020	male	University_of_Tennessee	USA	North_America	6.766	sb	4	-1		sb
LFLL206	Conservation_risk_of_Batrachochytrium_salamandrivorans_to_endemic_lungless_salamanders	https://doi.org/10.1111/conl.12675	Letter	Matthew_J_Gray	2	12	Conservation_Letters	13	2020	male	University_of_Tennessee	USA	North_America	6.766	sb	4	-1		sb
LMDV364	A_framework_for_mapping_and_comparing_behavioural_theories_in_models_of_social-ecological_systems,	https://doi.org/10.1016/j.ecolecon.2016.08.008.	analysis	Maja_Schluter	1	12	Ecological_Economics	131	2017	female	Stockholm University	Sweden	Europe	4.482	sb	1	-4		sb
LMDV364	A_framework_for_mapping_and_comparing_behavioural_theories_in_models_of_social-ecological_systems,	https://doi.org/10.1016/j.ecolecon.2016.08.008.	analysis	Nanda_Wijermans	2	12	Ecological_Economics	131	2017	female	Stockholm University	Sweden	Europe	4.482	sb	1	-4		sb
BSR142	Bringing_multiple_values_to_the_table:_assessing_future_land-use_and_climate_change_in_North_Kona,_Hawai<U+02BB>i	http://dx.doi.org/10.5751/ES-09936-230133	Synthesis	Leah_L_Bremer	1	12	Ecology_and_Society	23	2018	female	University_of_Hawai	USA	North_America	3,89	db	2	2		db
BSR142	Bringing_multiple_values_to_the_table:_assessing_future_land-use_and_climate_change_in_North_Kona,_Hawai<U+02BB>i	http://dx.doi.org/10.5751/ES-09936-230133	Synthesis	Tamara_Ticktin	2	12	Ecology_and_Society	23	2018	female	University_of_Hawai	USA	North_America	3,89	db	2	2		db
BSR204	Drivers_of_decoupling_and_recoupling_of_crop_and_livestock_systems_at_farm_and_territorial_scales	http://dx.doi.org/10.5751/ES-11412-250124	Synthesis	Judson_F._Valentim	2	12	Ecology_and_Society	25	2020	male	Embrapa_Acre	Brazil	South_America	3,89	db	4	4		db
BSR204	Drivers_of_decoupling_and_recoupling_of_crop_and_livestock_systems_at_farm_and_territorial_scales	http://dx.doi.org/10.5751/ES-11412-250124	Synthesis	Rachael_D._Garrett	1	12	Ecology_and_Society	25	2020	female	ETH_Zürich	Switzerland	Europe	3,89	db	4	4		db
LMDV01	Climate_extremes_and_ozone_pollution:_a_growing_threat_to_china’s_food_security	https://doi.org/10.1002/ehs2.1203	Research_article	Hanqin_Tian	1	12	Ecosystem_Health_and_Sustainability	2	2016	male	Auburn_University	USA	North_America	2.315	db	0	0		db
LMDV01	Climate_extremes_and_ozone_pollution:_a_growing_threat_to_china’s_food_security	https://doi.org/10.1002/ehs2.1203	Research_article	John_Reilly	2	12	Ecosystem_Health_and_Sustainability	2	2016	male	Massachusetts_Institute_of_Technology	USA	North_America	2.315	db	0	0		db
LMDV22	_Estimating_leaf_mercury_content_in_Phragmites_australis_based_on_leaf_hyperspectral_reflectance	https://doi.org/10.1080/20964129.2020.1726211	Article	Weiwei_Liu	1	12	Ecosystem_Health_and_Sustainability	6	2020	male	Chinese_Academy_of_Forest	China	Asia	2.315	db	4	4		db
LFLL233	Neuronal_fate_specification_by_the_Dbx1_transcription_factor_is_linked_to_the_evolutionary_acquisition_of_a_novel_functional_domain	https://doi.org/10.1186/s13227-016-0055-5	Research_article	Sonia_Karaz	1	12	EvoDevo	7	2016	female	Université_Paris_Diderot	France	Europe	2.146	sb	0	-5		sb
LFLL233	Neuronal_fate_specification_by_the_Dbx1_transcription_factor_is_linked_to_the_evolutionary_acquisition_of_a_novel_functional_domain	https://doi.org/10.1186/s13227-016-0055-5	Research_article	Giuseppe_D'Onofrio	2	12	EvoDevo	7	2016	male	Stazione_Zoologica_Anton_Dohrn	Italy	Europe	2.146	sb	0	-5		sb
LFLL359	Integrating_spatially_explicit_indices_of_abundance_and_habitat_quality:_an_applied_example_for_greater_sage‐grouse_management	https://doi.org/10.1111/1365-2664.12558	Research_article	David_J_Delehanty	2	12	Journal_of_Applied_Ecology	53	2016	male	Idaho_State_University	USA	North_America	5,84	sb	0	-5		sb
LFLL359	Integrating_spatially_explicit_indices_of_abundance_and_habitat_quality:_an_applied_example_for_greater_sage‐grouse_management	https://doi.org/10.1111/1365-2664.12558	Research_article	Peter_S_Coates	1	12	Journal_of_Applied_Ecology	53	2016	male	US_Geological_Survey	USA	North_America	5,84	sb	0	-5		sb
LFLL426	Defining_and_classifying_migratory_habitats_as_sources_and_sinks:_The_migratory_pathway_approach	https://doi.org/10.1111/1365-2664.12952	Research_article	Richard_A_Erickson	1	12	Journal_of_Applied_Ecology	55	2018	male	US_Geological_Survey	USA	North_America	5,84	sb	2	-3		sb
LFLL426	Defining_and_classifying_migratory_habitats_as_sources_and_sinks:_The_migratory_pathway_approach	https://doi.org/10.1111/1365-2664.12952	Research_article	Wayne_E_Thorgmartin	2	12	Journal_of_Applied_Ecology	55	2018	male	US_Geological_Survey	USA	North_America	5,84	sb	2	-3		sb
LFLL464	Unintended_habitat_loss_on_private_land_from_grazing_restrictions_on_public_rangelands	https://doi.org/10.1111/1365-2664.13271	Research_article	Claire_A_Runge	1	12	Journal_of_Applied_Ecology	56	2019	female	University_of_California	USA	North_America	5,84	sb	3	-2		sb
LFLL464	Unintended_habitat_loss_on_private_land_from_grazing_restrictions_on_public_rangelands	https://doi.org/10.1111/1365-2664.13271	Research_article	Joe_Fargione	2	12	Journal_of_Applied_Ecology	56	2019	male	The_Nature_Conservancy	USA	North_America	5,84	sb	3	-2		sb
LFLL25	Biological_richness_of_a_large_urban_cemetery_in_Berlin._Results_of_a_multi-taxon_approach	https://doi.org/10.3897/BDJ.4.e7057	Research_article	Birgit_Seitz	2	11	Biodiversity_Data_Journal	4	2016	female	Technische_Universität_Berlin	Germany	Europe	1,33	sb	0	-5		sb
LFLL25	Biological_richness_of_a_large_urban_cemetery_in_Berlin._Results_of_a_multi-taxon_approach	https://doi.org/10.3897/BDJ.4.e7057	Research_article	Sascha_Buchholz	1	11	Biodiversity_Data_Journal	4	2016	male	Technische_Universität_Berlin	Germany	Europe	1,33	sb	0	-5		sb
LFLL54	On_the_diversity_and_richness_of_understory_bryophytes_at_Nectandra_Cloud_Forest_Reserve,_Costa_Rica	https://doi.org/10.3897/BDJ.5.e11778	Research_article	Evelyne_T_Lennette	2	11	Biodiversity_Data_Journal	5	2017	female	Nectandra_Institute	Costa_Rica	Central_America	1,33	sb	1	-4		sb
LFLL53	A_global_map_of_saltmarshes	https://doi.org/10.3897/BDJ.5.e11764	Data_Paper	Chris_Mcowen	1	11	Biodiversity_Data_Journal	5	2017	male	UN Environment World Conservation Monitoring Centre, Cambridge, UK	UK	Europe	1,33	sb	1	-4		sb
LFLL53	A_global_map_of_saltmarshes	https://doi.org/10.3897/BDJ.5.e11764	Data_Paper	Steven_Fletcher	2	11	Biodiversity_Data_Journal	5	2017	male	UN_Environment_World_Conservation_Monitoring_Centre	UK	Europe	1,33	sb	1	-4		sb
LFLL54	On_the_diversity_and_richness_of_understory_bryophytes_at_Nectandra_Cloud_Forest_Reserve,_Costa_Rica	https://doi.org/10.3897/BDJ.5.e11778	Research_article	Daniel_Norris	1	11	Biodiversity_Data_Journal	5	2017	male	University_of_California	USA	North_America	1,33	sb	1	-4		sb
LFLL118	First_records_of_31_species_of_butterflies_and_moths_(Lepidoptera)_in_Cameroon,_with_remarks_on_their_elevational_ranges	https://doi.org/10.3897/BDJ.8.e50543	Article	Robert_Tropek	2	11	Biodiversity_Data_Journal	8	2020	male	Czech_Academy_of_Sciences	Czech Republic	Europe	1,33	sb	4	-1		sb
LFLL118	First_records_of_31_species_of_butterflies_and_moths_(Lepidoptera)_in_Cameroon,_with_remarks_on_their_elevational_ranges	https://doi.org/10.3897/BDJ.8.e50543	Article	Sylvain_Delabye	1	11	Biodiversity_Data_Journal	8	2020	male	Czech_Academy_of_Sciences	Czech Republic	Europe	1,33	sb	4	-1		sb
CCS625	A_new_report_of_Craspedacusta_sowerbii_(Lankester,_1880)_in_southern_Chile	https://doi.org/10.3391/bir.2017.6.1.05	Research_article	Karen_Fraire-Pacheco	1	11	Bioinvasions_Records	6	2017	female	Universidad del Bío-Bío	Chile	South_America	1,5	db	1	1		db
CCS625	A_new_report_of_Craspedacusta_sowerbii_(Lankester,_1880)_in_southern_Chile	https://doi.org/10.3391/bir.2017.6.1.055	Research_article	Emmanuel_Vega-Román	2	11	Bioinvasions_Records	6	2017	male	Universidad del Bío-Bío	Chile	South_America	1,5	db	1	1		db
MBS151	Herbarium_genomics:_plastome_sequence_assembly_from_a_range_of_herbarium_specimens_using_an_Iterative_Organelle_Genome_Assembly_pipeline	https://doi.org/10.1111/bij.12642	Research_article	Freek_T_Bakker	1	11	Biological_Journal_Of_The_Linnean_Society	117	2016	male	Wageningen_University	The_Netherlands	Europe	1,96	sb	0	-5		sb
MBS151	Herbarium_genomics:_plastome_sequence_assembly_from_a_range_of_herbarium_specimens_using_an_Iterative_Organelle_Genome_Assembly_pipeline	https://doi.org/10.1111/bij.12642	Research_article	Rens_Holmer	2	11	Biological_Journal_Of_The_Linnean_Society	117	2016	male	Wageningen_University	The_Netherlands	Europe	1,96	sb	0	-5		sb
MBS202	Genetic_evidence_for_several_cryptic_species_within_the_Scarturus_elater_species_complex_(Rodentia:_Dipodoidea):_when_cryptic_species_are_really_cryptic	https://doi.org/10.1093/biolinnean/bly154	Original_article	Georgy_Shenbrot	2	11	Biological_Journal_Of_The_Linnean_Society	126	2019	male	Ben-Gurion_University_of_the_Negev	Israel	Asia	1,96	sb	3	-2		sb
MBS202	Genetic_evidence_for_several_cryptic_species_within_the_Scarturus_elater_species_complex_(Rodentia:_Dipodoidea):_when_cryptic_species_are_really_cryptic	https://doi.org/10.1093/biolinnean/bly154	Original_article	Anna_Bannikova	1	11	Biological_Journal_Of_The_Linnean_Society	126	2019	female	Vorobievy_Gory	Russia	Europe	1,96	sb	3	-2		sb
MBS216	Macroevolutionary_trends_of_brain_mass_in_Primates	https://doi.org/10.1093/biolinnean/blz161	Original_article	Marina_Melchionna	1	11	Biological_Journal_Of_The_Linnean_Society	129	2020	female	Università_degli_Studi_di_Napoli_Federico_II	Italy	Europe	1,96	sb	4	-1		sb
MBS216	Macroevolutionary_trends_of_brain_mass_in_Primates	https://doi.org/10.1093/biolinnean/blz161	Original_article	Pasquale_Raia	2	11	Biological_Journal_Of_The_Linnean_Society	129	2020	male	Università_degli_Studi_di_Napoli_Federico_II	Italy	Europe	1,96	sb	4	-1		sb
CCS	Assessing above-ground woody debris dynamics along a gradient of elevation in Amazonian cloud forests in Peru: balancing above-ground inputs and respiration outputs	10.1080/17550874.2013.818073	Research article	Yadvinder Malhi	2	11	Botanical_Journal_of_Scotland	7	2014	male	Environmental Change Institute , Oxford University , Oxford , UK	UK			db	4	4	pos	db
CCS	Assessing above-ground woody debris dynamics along a gradient of elevation in Amazonian cloud forests in Peru: balancing above-ground inputs and respiration outputs	10.1080/17550874.2013.818073	Research article	Daniel J. Gurdak	1	11	Botanical_Journal_of_Scotland	7	2014	male	Environmental Change Institute , Oxford University , Oxford , UK ; Department of Environmental and Forest Biology , State University of New York , Syracuse , USA	USA			db	4	4	pos	db
LMDV123	Effectiveness_of_Scat‐Detection_Dogs_in_Determining_Species_Presence_in_a_Tropical_Savanna_Landscape_	https://doi.org/10.1111/j.1523-1739.2010.01581.x	Contributed_papers	Carly_Vynne	1	11	Conservation_Biology	25	2011	female	University of Washington	USA	North_America	5.405	db	-3	-3	pre	sb
LMDV123	Effectiveness_of_Scat‐Detection_Dogs_in_Determining_Species_Presence_in_a_Tropical_Savanna_Landscape_	https://doi.org/10.1111/j.1523-1739.2010.01581.x	Contributed_papers	Samuel_K_Wasser	2	11	Conservation_Biology	25	2011	male	University of Washington	USA	North_America	5.405	db	-3	-3	pre	sb
LMDV298	Passive_acoustic_monitoring_of_the_decline_of_Mexico's_critically_endangered_vaquita	https://doi.org/10.1111/cobi.12789	contributed_papers	Armando_Jaramillo_Legorreta	1	11	Conservation_Biology	31	2017	male	Instituto Nacional de Ecología y Cambio Climático/SEMARNAT	Mexico	North_America	5.405	db	1	1	pos	db
LMDV298	Passive_acoustic_monitoring_of_the_decline_of_Mexico's_critically_endangered_vaquita	https://doi.org/10.1111/cobi.12789	contributed_papers	Barbara_Taylor	2	11	Conservation_Biology	31	2017	female	Southwest Fisheries Science Center, NOAA	USA	North_America	5.405	db	1	1	pos	db
LMDV310	Quantitative_tools_for_implementing_the_new_definition_of_significant_portion_of_the_range_in_the_U.S._Endangered_Species_Act	https://doi.org/10.1111/cobi.12963	Review	Julia_Earl	1	11	Conservation_Biology	32	2018	female	Louisiana Tech University,	USA	North_America	5.405	db	2	2	pos	db
LMDV310	Quantitative_tools_for_implementing_the_new_definition_of_significant_portion_of_the_range_in_the_U.S._Endangered_Species_Act	https://doi.org/10.1111/cobi.12963	Review	Laura_Lopez-Hoffman	2	11	Conservation_Biology	32	2018	female	University_of_Arizona	USA	North_America	5.405	db	2	2	pos	db
BSR	Use of ambiguous detections to improve estimates from species distribution models	https://conbio.onlinelibrary.wiley.com/doi/10.1111/cobi.13191	Conservation Methods	Julie L	1	11	Conservation_Biology	33	2019	female		France			db	3	3	pos	db
BSR	Use of ambiguous detections to improve estimates from species distribution models	https://conbio.onlinelibrary.wiley.com/doi/10.1111/cobi.13191	Conservation Methods	Olivier G	2	11	Conservation_Biology	33	2019	male		France			db	3	3	pos	db
BSR	Population viability and harvest sustainability for Madagascar lemurs	https://conbio.onlinelibrary.wiley.com/doi/10.1111/cobi.13151	Contributed papers	Cara B	1	11	Conservation_Biology	33	2019	female		USA			db	3	3	pos	db
BSR	Population viability and harvest sustainability for Madagascar lemurs	https://conbio.onlinelibrary.wiley.com/doi/10.1111/cobi.13151	Contributed papers	Christopher G	2	11	Conservation_Biology	33	2019	male		USA			db	3	3	pos	db
CCS	Effectiveness of Panama as an intercontinental land bridge for large mammals	https://doi.org/10.1111/cobi.13384	Contributed Papers	Ninon F. V. Meyer	1	11	Conservation_Biology	34	2020	female		Mexico			db	4	4	pos	db
CCS	Effectiveness of Panama as an intercontinental land bridge for large mammals	https://doi.org/10.1111/cobi.13384	Contributed Papers	Patrick A. Jansen	2	11	Conservation_Biology	34	2020	male		Panama			db	4	4	pos	db
LFLL179	The_Value_of_the_IUCN_Red_List_for_Business_Decision‐Making	https://doi.org/10.1111/conl.12353	Policy_Perspectives	John_D_Pilgrim	2	11	Conservation_Letters	11	2018	male	The_Biodiversity_Consultancy	UK	Europe	6.766	sb	2	-3		sb
LFLL179	The_Value_of_the_IUCN_Red_List_for_Business_Decision‐Making	https://doi.org/10.1111/conl.12353	Policy_Perspectives	Leon_Bennun	1	11	Conservation_Letters	11	2018	male	The_Biodiversity_Consultancy	UK	Europe	6.766	sb	2	-3		sb
LMDV338	Opening_the_black_box_of_energy_throughputs_in_farm_systems:_A_decomposition_analysis_between_the_energy_returns_to_external_inputs,_internal_biomass_reuses_and_total_inputs_consumed_(the_VallÃ¨s_County,_Catalonia,_c.1860_and_1999),	https://doi.org/10.1016/j.ecolecon.2015.11.012.	Analysis	David_Moreno-Delgado	2	11	Ecological_Economics	121	2016	male	Institut de Génomique Fonctionnelle	France	Europe	4.482	sb	0	-5		sb
LMDV338	Opening_the_black_box_of_energy_throughputs_in_farm_systems:_A_decomposition_analysis_between_the_energy_returns_to_external_inputs,_internal_biomass_reuses_and_total_inputs_consumed_(the_VallÃ¨s_County,_Catalonia,_c.1860_and_1999),	https://doi.org/10.1016/j.ecolecon.2015.11.012.	analysis	Enric_Tello	1	11	Ecological_Economics	121	2016	male	University of Barcelona	Spain	Europe	4.482	sb	0	-5		sb
BSR66	Spatiotemporal_dynamics_of_simulated_wildfire,_forest_management,_and_forest_succession_in_central_Oregon,_USA	http://dx.doi.org/10.5751/ES-08917-220124	Research_article	Ana_M._G._Barros	1	11	Ecology_and_Society	22	2017	female	Oregon_State_University	USA	North_America	3,89	db	1	1		db
BSR66	Spatiotemporal_dynamics_of_simulated_wildfire,_forest_management,_and_forest_succession_in_central_Oregon,_USA	http://dx.doi.org/10.5751/ES-08917-220124	Research_article	John_P._Bolte	2	11	Ecology_and_Society	22	2017	male	Oregon_State_University	USA	North_America	3,89	db	1	1		db
LMDV05	An_ecosystem‐based_approach_to_marine_risk_assessment	https://doi.org/10.1002/ehs2.1256	Research_article	Kelly_Andrews	2	11	Ecosystem_Health_and_Sustainability	3	2017	female	National_Marine_Fisheries_Service	USA	North_America	2.315	db	1	1		db
LMDV05	An_ecosystem‐based_approach_to_marine_risk_assessment	https://doi.org/10.1002/ehs2.1256	Research_article	Kirstin_Holsman	1	11	Ecosystem_Health_and_Sustainability	3	2017	female	National_Marine_Fisheries_Service	USA	North_America	2.315	db	1	1		db
LFLL287	Genome-wide_transcriptome_profiling_and_spatial_expression_analyses_identify_signals_and_switches_of_development_in_tapeworms	https://doi.org/10.1186/s13227-018-0110-5	Research_article	Matt_Berriman	2	11	EvoDevo	9	2018	male	Wellcome_Trust_Sanger_Institute	UK	Europe	2.146	sb	2	-3		sb
LFLL287	Genome-wide_transcriptome_profiling_and_spatial_expression_analyses_identify_signals_and_switches_of_development_in_tapeworms	https://doi.org/10.1186/s13227-018-0110-5	Research_article	Peter_D_Olson	1	11	EvoDevo	9	2018	male	The_Natural_History_Museum	UK	Europe	2.146	sb	2	-3		sb
LFLL456	Eco‐engineering_urban_infrastructure_for_marine_and_coastal_biodiversity:_Which_interventions_have_the_greatest_ecological_benefit?	https://doi.org/10.1111/1365-2664.12961	Review	Elisabeth_MA_Strain	1	11	Journal_of_Applied_Ecology	55	2018	female	Sydney_Institute_of_Marine_Science	Australia	Oceania	5,84	sb	2	-3		sb
LFLL456	Eco‐engineering_urban_infrastructure_for_marine_and_coastal_biodiversity:_Which_interventions_have_the_greatest_ecological_benefit?	https://doi.org/10.1111/1365-2664.12961	Review	Melanie_J_Bishop	2	11	Journal_of_Applied_Ecology	55	2018	female	Sydney_Institute_of_Marine_Science	Australia	Oceania	5,84	sb	2	-3		sb
LFLL469	Coordinated_species_importation_policies_are_needed_to_reduce_serious_invasions_globally:_The_case_of_alien_bumblebees_in_South_America	https://doi.org/10.1111/1365-2664.13121	Policy_Direction	Marcelo_A_Aizen	1	11	Journal_of_Applied_Ecology	56	2019	male	Universidad_Nacional_del_Comahue	Argentina	South_America	5,84	sb	3	-2		sb
LFLL469	Coordinated_species_importation_policies_are_needed_to_reduce_serious_invasions_globally:_The_case_of_alien_bumblebees_in_South_America	https://doi.org/10.1111/1365-2664.13121	Policy_Direction	Lawrence_D_Harder	2	11	Journal_of_Applied_Ecology	56	2019	male	University_of_Calgary	Canada	North_America	5,84	sb	3	-2		sb
LFLL467	Riparian_buffers_in_tropical_agriculture:_Scientific_support,_effectiveness_and_directions_for_policy	https://doi.org/10.1111/1365-2664.13280	Policy_Direction	Sarah_H_Luke	1	11	Journal_of_Applied_Ecology	56	2019	female	University_of_Kent	UK	Europe	5,84	sb	3	-2		sb
LFLL467	Riparian_buffers_in_tropical_agriculture:_Scientific_support,_effectiveness_and_directions_for_policy	https://doi.org/10.1111/1365-2664.13280	Policy_Direction	Matthew_J_Struebig	2	11	Journal_of_Applied_Ecology	56	2019	male	University_of_Kent	UK	Europe	5,84	sb	3	-2		sb
LFLL485	Rubber_agroforestry_in_Thailand_provides_some_biodiversity_benefits_without_reducing_yields	https://doi.org/10.1111/1365-2664.13530	Research_article	Eleanor_Warren-Thomas	1	11	Journal_of_Applied_Ecology	57	2020	female	University_of_East_Anglia	UK	Europe	5,84	sb	4	-1		sb
LFLL485	Rubber_agroforestry_in_Thailand_provides_some_biodiversity_benefits_without_reducing_yields	https://doi.org/10.1111/1365-2664.13530	Research_article	Paul_M_Dolman	2	11	Journal_of_Applied_Ecology	57	2020	male	University_of_East_Anglia	UK	Europe	5,84	sb	4	-1		sb
MBS283	On_the_origin_of_endemic_species_in_the_Red_Sea	https://doi.org/10.1111/jbi.12631	Synthesis	Joseph_D_DiBattista	1	11	Journal_of_Biogeography	43	2016	male	King_Abdullah_University_of_Science_and_Technology	Saudi_Arabia	Asia	3.723	sb	0	-5		sb
MBS283	On_the_origin_of_endemic_species_in_the_Red_Sea	https://doi.org/10.1111/jbi.12631	Synthesis	Michael_L_Berumen	2	11	Journal_of_Biogeography	43	2016	male	King_Abdullah_University_of_Science_and_Technology	Saudi_Arabia	Asia	3.723	sb	0	-5		sb
MBS338	Environmental_variation_is_a_major_predictor_of_global_trait_turnover_in_mammals	https://doi.org/10.1111/jbi.13091	Original_article	Ben_G_Holt	1	11	Journal_of_Biogeography	45	2018	male	Imperial_College_London	UK	Europe	3.723	sb	2	-3		sb
MBS338	Environmental_variation_is_a_major_predictor_of_global_trait_turnover_in_mammals	https://doi.org/10.1111/jbi.13091	Original_article	Catherine_H_Graham	2	11	Journal_of_Biogeography	45	2018	female	Stony_Brook_University	USA	North_America	3.723	sb	2	-3		sb
MBS363	Macroecology_as_a_hub_between_research_disciplines:_Opportunities,_challenges_and_possible_ways_forward	https://doi.org/10.1111/jbi.13751	Original_article	Susanne_A_Fritz	2	11	Journal_of_Biogeography	47	2020	female	Senckenberg_Biodiversity_and_Climate_Research_Institute	Germany	Europe	3.723	sb	4	-1		sb
MBS363	Macroecology_as_a_hub_between_research_disciplines:_Opportunities,_challenges_and_possible_ways_forward	https://doi.org/10.1111/jbi.13751	Original_article	Pedro_J_Leitão	1	11	Journal_of_Biogeography	47	2020	male	Technische_Universität_Braunschweig	Germany	Europe	3.723	sb	4	-1		sb
CCS	Post-glacial establishment of locally adapted fish populations over a steep salinity gradient	/doi/10.1111/jeb.13668	Special_issue	Erica H. Leder	1	11	Journal_of_evolutionary_biology	34	2021	female	Centre for Marine Evolutionary Biology, University of Gothenburg, Gothenburg, Sweden	Sweden	cont	2.541	db	3		pos	db
CCS	Post-glacial establishment of locally adapted fish populations over a steep salinity gradient	/doi/10.1111/jeb.13668	Special_issue	Ola Svensson	2	11	Journal_of_evolutionary_biology	34	2021	male	Centre for Marine Evolutionary Biology, University of Gothenburg, Gothenburg, Sweden	Sweden	cont	2.541	db	3		pos	db
MBS65	Growth–climate_response_and_drought_reconstruction_from_tree-ring_of_Mongolian_pine_in_Hulunbuir,_Northeast_China	https://doi.org/10.1093/jpe/rtv029	Research_article	Xiao_Zhang	2	11	Journal_of_Plant_Ecology	9	2016	male	Chinese_Academy_of_Forestry	China	Asia	1.833	sb	0	-5		sb
MBS65	Growth–climate_response_and_drought_reconstruction_from_tree-ring_of_Mongolian_pine_in_Hulunbuir,_Northeast_China	https://doi.org/10.1093/jpe/rtv029	Research_article	Zhongjie_Shi	1	11	Journal_of_Plant_Ecology	9	2016	male	Chinese_Academy_of_Forestry	China	Asia	1.833	sb	0	-5		sb
MBS87	Interspecific_and_intraspecific_variation_in_specific_root_length_drives_aboveground_biodiversity_effects_in_young_experimental_forest_stands	https://doi.org/10.1093/jpe/rtw096	Research_article	Keping_Ma	2	11	Journal_of_Plant_Ecology	10	2017	male	Chinese_Academy_of_Sciences	China	Asia	1.833	sb	1	-4		sb
MBS87	Interspecific_and_intraspecific_variation_in_specific_root_length_drives_aboveground_biodiversity_effects_in_young_experimental_forest_stands	https://doi.org/10.1093/jpe/rtw096	Research_article	Wensheng_Bu	1	11	Journal_of_Plant_Ecology	10	2017	male	Chinese_Academy_of_Sciences	China	Asia	1.833	sb	1	-4		sb
MBS119	Species_richness_and_composition_of_shrub-encroached_grasslands_in_relation_to_environmental_factors_in_northern_China	https://doi.org/10.1093/jpe/rtx062	Research_article	Jingyun_Fang	2	11	Journal_of_Plant_Ecology	12	2019	male	Chinese_Academy_of_Sciences	China	Asia	1.833	sb	3	-2		sb
AN256	Mechanisms of Assortative Mating in Speciation with Gene Flow: Connecting Theory and Empirical Research	https://doi/10.1086/694889	Synthesis	Michael Kopp	1	11	The_American_Naturalist	191	2018	male	1. Aix Marseille Université, CNRS, Centrale Marseille, I2M, 3 Place Victor Hugo, 13331 Marseille Cedex 3, France	France	Europe	2541	db	1		pos	db
AN95	Are Gastropods, Rather than Ants, Important Dispersers of Seeds of Myrmecochorous Forest Herbs?	https://doi/10.1086/663195	NATURAL HISTORY NOTE	Manfred Türke	1	11	The_American_Naturalist	179	2012	male	1. Institute of Ecology, Friedrich Schiller University, D-07743 Jena, Germany	Germany	Europe	2541	db	-3		pre	sb
AN96	Are Gastropods, Rather than Ants, Important Dispersers of Seeds of Myrmecochorous Forest Herbs?	https://doi/10.1086/663195	NATURAL HISTORY NOTE	Wolfgang W. Weisser	2	11	The_American_Naturalist	179	2012	male	1. Institute of Ecology, Friedrich Schiller University, D-07743 Jena, Germany	Germany	Europe	2541	db	-3		pre	sb
AN257	Mechanisms of Assortative Mating in Speciation with Gene Flow: Connecting Theory and Empirical Research	https://doi/10.1086/694889	Synthesis	G. Sander van Doorn	2	11	The_American_Naturalist	191	2018	male	9. Groningen Institute for Evolutionary Life Sciences, University of Groningen, Groningen, The Netherlands	The_Netherlands	Europe	2541	db	1		pos	db
CCS228	Does_defection_during_predator_inspection_affect_social_structure_in_wild_shoals_of_guppies?	https://doi.org/10.1016/j.anbehav.2007.06.004	Research_article	Jens_Krause	2	10	Animal_Behaviour	75	2008	male	Institute for Integrative and Comparative Biology, University of Leeds, U.K	UK	Europe	2.689	db	-1	-1	pre	sb
CCS228	Does_defection_during_predator_inspection_affect_social_structure_in_wild_shoals_of_guppies?	https://doi.org/10.1016/j.anbehav.2007.06.004	Research_article	Philip_O_R_Thomas	1	10	Animal_Behaviour	75	2008	male	Institute for Integrative and Comparative Biology, University of Leeds, U.K	UK	Europe	2.689	db	-1	-1	pre	sb
LMDV591	Current_issues_in_plant_cryopreservation_and_importance_for_ex_situ_conservation_of_threatened_Australian_native_species	https://doi.org/10.1071/BT18147	Research_Article	Robyn_Streczynski	1	10	Australian_Journal_of_Botany	67	2019	female	School of Pharmacy and Biomedical Sciences, Curtin Health Innovation Research Institute, Curtin University, GPO Box U1985, Perth, WA 6845, Australia.	Australia	Oceania	1.386	sb	3	-2		sb
LMDV591	Current_issues_in_plant_cryopreservation_and_importance_for_ex_situ_conservation_of_threatened_Australian_native_species	https://doi.org/10.1071/BT18147	Research_Article	Ricardo_L_Mancera	2	10	Australian_Journal_of_Botany	67	2019	male	School of Pharmacy and Biomedical Sciences, Curtin Health Innovation Research Institute, Curtin University, GPO Box U1985, Perth, WA 6845, Australia.	Australia	Oceania	1.386	sb	3	-2		sb
BSR603	Irruptions:_evidence_for_breeding_season_habitat_limitation_in_Piping_Plover_(Charadrius_melodus)	http://dx.doi.org/10.5751/ACE-01373-140119	Research_article	Alexra_Wilke	2	10	Avian_Conservation_and_Ecology	14	2019	female	The_Nature_Conservancy	USA	North_America	2.541	db	3	3		db
BSR603	Irruptions:_evidence_for_breeding_season_habitat_limitation_in_Piping_Plover_(Charadrius_melodus)	http://dx.doi.org/10.5751/ACE-01373-140119	Research_article	Samantha_Robinson	1	10	Avian_Conservation_and_Ecology	14	2019	female	Virginia_Tech	USA	North_America	2.541	db	3	3		db
LFLL17	Vegetation_and_floristics_of_a_lowland_tropical_rainforest_in_northeast_Australia	https://doi.org/10.3897/BDJ.4.e7599	Data_Paper	Susan_GW_Laurance	2	10	Biodiversity_Data_Journal	4	2016	female	James_Cook_University	Australia	Oceania	1,33	sb	0	-5		sb
LFLL17	Vegetation_and_floristics_of_a_lowland_tropical_rainforest_in_northeast_Australia	https://doi.org/10.3897/BDJ.4.e7599	Data_Paper	David_YP_Tng	1	10	Biodiversity_Data_Journal	4	2016	male	James_Cook_University	Australia	Oceania	1,33	sb	0	-5		sb
LFLL76	A_benchmark_dataset_of_herbarium_specimen_images_with_label_data	https://doi.org/10.3897/BDJ.7.e31817	Data_Paper	Mathias_Dillen	1	10	Biodiversity_Data_Journal	7	2019	male	Meise_Botanic_Garden	Belgium	Europe	1,33	sb	3	-2		sb
LFLL76	A_benchmark_dataset_of_herbarium_specimen_images_with_label_data	https://doi.org/10.3897/BDJ.7.e31817	Data_Paper	Sarah_Phillips	2	10	Biodiversity_Data_Journal	7	2019	female	Royal_Botanical_Gardens	UK	Europe	1,33	sb	3	-2		sb
LFLL81	New_record_of_Trissolcus_solocis_(Hymenoptera:_Scelionidae)_parasitising_Halyomorpha_halys_(Hemiptera:_Pentatomidae)_in_the_United_States_of_America	https://doi.org/10.3897/BDJ.7.e30124	Article	Glynn_Tillman	2	10	Biodiversity_Data_Journal	7	2019	female	US_Department_of_Agriculture	USA	North_America	1,33	sb	3	-2		sb
LFLL81	New_record_of_Trissolcus_solocis_(Hymenoptera:_Scelionidae)_parasitising_Halyomorpha_halys_(Hemiptera:_Pentatomidae)_in_the_United_States_of_America	https://doi.org/10.3897/BDJ.7.e30124	Article	Rammohan_Balusu	1	10	Biodiversity_Data_Journal	7	2019	male	Auburn_University	USA	North_America	1,33	sb	3	-2		sb
LFLL114	Towards_conserving_natural_diversity:_A_biotic_inventory_by_observations,_specimens,_DNA_barcoding_and_high-throughput_sequencing_methods	https://doi.org/10.3897/BDJ.8.e50124	Research_article	Joel_Stone	2	10	Biodiversity_Data_Journal	8	2020	male	University_of_Alaska_Fairbanks	USA	North_America	1,33	sb	4	-1		sb
LFLL114	Towards_conserving_natural_diversity:_A_biotic_inventory_by_observations,_specimens,_DNA_barcoding_and_high-throughput_sequencing_methods	https://doi.org/10.3897/BDJ.8.e50124	Research_article	Matthew_Bowser	1	10	Biodiversity_Data_Journal	8	2020	male	US_Fish_&_Wildlife_Service	USA	North_America	1,33	sb	4	-1		sb
CCS628	First_record_of_the_Charru_mussel_Mytella_charruana_d’Orbignyi,_1846_(Bivalvia:_Mytilidae)_from_Manila_Bay,_Luzon,_Philippines	https://doi.org/10.3391/bir.2017.6.1.088	Research_article	Ernelea_P._Cao	2	10	Bioinvasions_Records	6	2017	female	University of the Philippines Diliman	Philippines	Asia	1,5	db	1	1		db
CCS628	First_record_of_the_Charru_mussel_Mytella_charruana_d’Orbignyi,_1846_(Bivalvia:_Mytilidae)_from_Manila_Bay,_Luzon,_Philippines	https://doi.org/10.3391/bir.2017.6.1.08	Research_article	Benjamin_Vallejo_Jr	1	10	Bioinvasions_Records	6	2017	male	University of the Philippines Diliman	Philippines	Asia	1,5	db	1	1		db
CCS640	Winter_swarming_behavior_by_the_exotic_cladoceran_Daphnia_lumholtzi_Sars,_1885_in_a_Kentucky_(USA)_reservoir	https://doi.org/10.3391/bir.2018.7.1.066	Research_article	Dawn_T._Koenig	2	10	Bioinvasions_Records	7	2018	female	BSA Environmental Services	USA	North_America	1,5	db	2	2		db
CCS640	Winter_swarming_behavior_by_the_exotic_cladoceran_Daphnia_lumholtzi_Sars,_1885_in_a_Kentucky_(USA)_reservoir	https://doi.org/10.3391/bir.2018.7.1.06	Research_article	John_R._Beaver	1	10	Bioinvasions_Records	7	2018	male	BSA Environmental Services	USA	North_America	1,5	db	2	2		db
MBS153	The_use_of_museum_samples_for_large-scale_sequence_capture:_a_study_of_congeneric_horseshoe_bats_(family_Rhinolophidae)	https://doi.org/10.1111/bij.12620	Research_article	Sebastian_E_Bailey	1	10	Biological_Journal_Of_The_Linnean_Society	117	2016	male	Queen_Mary_University_of_London	UK	Europe	1,96	sb	0	-5		sb
MBS153	The_use_of_museum_samples_for_large-scale_sequence_capture:_a_study_of_congeneric_horseshoe_bats_(family_Rhinolophidae)	https://doi.org/10.1111/bij.12620	Research_article	Stephen_J_Rossiter	2	10	Biological_Journal_Of_The_Linnean_Society	117	2016	male	Queen_Mary_University_of_London	UK	Europe	1,96	sb	0	-5		sb
MBS231	Late_Miocene_origin_and_recent_population_collapse_of_the_Malagasy_savanna_olive_tree_(Noronhia_lowryi)	https://doi.org/10.1093/biolinnean/blz164	Original_article	Guillaume_Besnard	2	10	Biological_Journal_Of_The_Linnean_Society	129	2020	male	Université_Paul_Sabatier	France	Europe	1,96	sb	4	-1		sb
MBS231	Late_Miocene_origin_and_recent_population_collapse_of_the_Malagasy_savanna_olive_tree_(Noronhia_lowryi)	https://doi.org/10.1093/biolinnean/blz164	Original_article	Jordi_Salmona	1	10	Biological_Journal_Of_The_Linnean_Society	129	2020	male	Université_Paul_Sabatier	France	Europe	1,96	sb	4	-1		sb
MBS225	Evidence_for_rapid_phenotypic_and_behavioural_shifts_in_a_recently_established_cavefish_population	https://doi.org/10.1093/biolinnean/blz162	Original_article	Suzanne_E_McGaugh	1	10	Biological_Journal_Of_The_Linnean_Society	129	2020	female	University_of_Minnesota	USA	North_America	1,96	sb	4	-1		sb
MBS225	Evidence_for_rapid_phenotypic_and_behavioural_shifts_in_a_recently_established_cavefish_population	https://doi.org/10.1093/biolinnean/blz162	Original_article	Andrew_G_Gluesenkamp	2	10	Biological_Journal_Of_The_Linnean_Society	129	2020	male	Center_for_Conservation_and_Research	USA	North_America	1,96	sb	4	-1		sb
CCS41	Route,_speed_and_mode_of_oak_postglacial_colonisation_across_the_British_Isles:_Integrating_molecular_ecology,_palaeoecology_and_modelling_approaches	https://doi.org/10.1080/03746600508685085	Original_article	Andrew_Lowe	1	10	Botanical_Journal_of_Scotland	57	2005	male	Centre for Ecology & Hydrology , Edinburgh, Bush Estate, Penicuik , EH26 OQB , UK ; School of Integrative Biology , University of Queensland , St Lucia , Brisbane , QLD 4072 , Australia	Australia	Oceania	1,2	db	-2	-2	pre	sb
CCS41	Route,_speed_and_mode_of_oak_postglacial_colonisation_across_the_British_Isles:_Integrating_molecular_ecology,_palaeoecology_and_modelling_approaches	https://doi.org/10.1080/03746600508685085	Original_article	Joan_Cottrell	2	10	Botanical_Journal_of_Scotland	57	2005	male	Centre for Ecology & Hydrology , Edinburgh, Bush Estate, Penicuik , EH26 OQB , UK ; School of Integrative Biology , University of Queensland , St Lucia , Brisbane , QLD 4072 , Australia	Australia	Oceania	1,2	db	-2	-2	pre	sb
BSR	A novel application of satellite radar data: measuring carbon sequestration and detecting degradation in a community forestry project in Mozambique	https://www.tandfonline.com/doi/full/10.1080/17550874.2012.695814	Article	Edward T.A. Mitchard	1	10	Botanical_Journal_of_Scotland	6	2013	male		UK	Europe	2.64	db	3	3	pos	db
BSR	A novel application of satellite radar data: measuring carbon sequestration and detecting degradation in a community forestry project in Mozambique	https://www.tandfonline.com/doi/full/10.1080/17550874.2012.695814	Article	Sassan S. Saatchi	2	10	Botanical_Journal_of_Scotland	6	2013	male		UK	Europe	2.64	db	3	3	pos	db
CCS	Diversity, abundance and distribution of lianas of the Cerrado–Amazonian forest transition, Brazil	10.1080/17550874.2013.816799	Research article	Edmar Almeida de Oliveira	1	10	Botanical_Journal_of_Scotland	7	2014	male	Universidade do Estado de Mato Grosso (UNEMAT), Campus de Nova Xavantina, Programa de Pós-Graduação em Ecologia e Conservação , Nova Xavantina-MT , Brasil	Brazil			db	4	4	pos	db
CCS	Changes in forest structure and composition after fire in tropical montane cloud forests near the Andean treeline	10.1080/17550874.2013.816800	Research article	Rosa-Maria Román-Cuesta	2	10	Botanical_Journal_of_Scotland	7	2014	female	Centre for Ecological Research and Forestry Applications, Autonomous University of Barcelona , Barcelona , Spain	Spain			db	4	4	pos	db
CCS	Changes in forest structure and composition after fire in tropical montane cloud forests near the Andean treeline	10.1080/17550874.2013.816800	Research article	Imma Oliveras	1	10	Botanical_Journal_of_Scotland	7	2014	female	Environmental Change Institute, School of Geography and the Environment , University of Oxford , UK	UK			db	4	4	pos	db
CCS	Diversity, abundance and distribution of lianas of the Cerrado–Amazonian forest transition, Brazil	10.1080/17550874.2013.816799	Research article	Oliver L. Phillips	2	10	Botanical_Journal_of_Scotland	7	2014	male	Earth and Biosphere Institute, School of Geography, University of Leeds , Leeds , UK	UK			db	4	4	pos	db
LMDV33	Biodiversity_Conservation_in_Local_Planning_	https://doi.org/10.1111/j.1523-1739.2008.01110.x	Contributed_papers	James_R_Miller	1	10	Conservation_Biology	23	2009	male	Iowa_State_University	USA	North_America	5.405	db	-5	-5	pre	sb
LMDV33	Biodiversity_Conservation_in_Local_Planning_	https://doi.org/10.1111/j.1523-1739.2008.01110.x	Contributed_papers	Ryan_Marquardt	2	10	Conservation_Biology	23	2009	male	Iowa_State_University	USA	North_America	5.405	db	-5	-5	pre	sb
LMDV66	Payments_for_Ecosystem_Services_as_a_Framework_for_Community‐Based_Conservation_in_Northern_Tanzania_	https://doi.org/10.1111/j.1523-1739.2009.01393.xx	Conservation_Practice_and_Policy	Andrew_Williams	2	10	Conservation_Biology	24	2010	male	Tanzania_Natural_Resource_Forum	Tanzania	Africa	5.405	db	-4	-4	pre	sb
LMDV66	Payments_for_Ecosystem_Services_as_a_Framework_for_Community‐Based_Conservation_in_Northern_Tanzania_	https://doi.org/10.1111/j.1523-1739.2009.01393.x	Conservation_Practice_and_Policy	Fred_Nelson	1	10	Conservation_Biology	24	2010	male	Maliasili_Initiatives	Tanzania	Africa	5.405	db	-4	-4	pre	sb
LMDV172	Assessment_of_Management_to_Mitigate_Anthropogenic_Effects_on_Large_Whales	https://doi.org/10.1111/j.1523-1739.2012.01934.x	Contributed_papers	Julie_M_Van_Der_Hoop	1	10	Conservation_Biology	27	2013	female	Hole Oceanographic Institution	USA	North_America	5.405	db	-1	-1	pre	sb
LMDV172	Assessment_of_Management_to_Mitigate_Anthropogenic_Effects_on_Large_Whales	https://doi.org/10.1111/j.1523-1739.2012.01934.x	Contributed_papers	Andrew_R_Solow	2	10	Conservation_Biology	27	2013	male	Hole Oceanographic Institution	USA	North_America	5.405	db	-1	-1	pre	sb
LMDV271	Knowledge_co-production_and_boundary_work_to_promote_implementation_of_conservation_plans	https://doi.org/10.1111/cobi.12560	Contributed_papers	Belinda_Reyers	2	10	Conservation_Biology	30	2016	female	Council for Scientific and Industrial Research	South_Africa	Africa	5.405	db	0	0	pos	db
LMDV271	Knowledge_co-production_and_boundary_work_to_promote_implementation_of_conservation_plans	https://doi.org/10.1111/cobi.12560	Contributed_papers	Jeanne_Nel	1	10	Conservation_Biology	30	2016	female	Council for Scientific and Industrial Research	South_Africa	Africa	5.405	db	0	0	pos	db
LMDV258	A_typology_of_time-scale_mismatches_and_behavioral_interventions_to_diagnose_and_solve_conservation_problems	https://doi.org/10.1111/cobi.12632	Essay	Debra_Peters	2	10	Conservation_Biology	30	2016	female	USDA Agricultural Research Service	USA	North_America	5.405	db	0	0	pos	db
LMDV258	A_typology_of_time-scale_mismatches_and_behavioral_interventions_to_diagnose_and_solve_conservation_problems	https://doi.org/10.1111/cobi.12632	Essay	Robyn_Wilson	1	10	Conservation_Biology	30	2016	female	Ohio State University	USA	North_America	5.405	db	0	0	pos	db
LMDV317	Gaps_and_opportunities_for_the_World_Heritage_Convention_to_contribute_to_global_wilderness_conservation	https://doi.org/10.1111/cobi.12976	contributed_papers	James_Allan	1	10	Conservation_Biology	32	2018	male	University of Queensland	Australia	Oceania	5.405	db	2	2	pos	db
LMDV317	Gaps_and_opportunities_for_the_World_Heritage_Convention_to_contribute_to_global_wilderness_conservation	https://doi.org/10.1111/cobi.12976	contributed_papers	James_Watson	2	10	Conservation_Biology	32	2018	male	University of Queensland	Australia	Oceania	5.405	db	2	2	pos	db
CCS	Effectiveness of management zoning designed for flagship species in protecting sympatric species	https://doi.org/10.1111/cobi.13362	Contributed Papers	Xiaoli Shen	1	10	Conservation_Biology	34	2020	female		China			db	4	4	pos	db
CCS	Effectiveness of management zoning designed for flagship species in protecting sympatric species	https://doi.org/10.1111/cobi.13362	Contributed Papers	Keping Ma	2	10	Conservation_Biology	34	2020	male		China			db	4	4	pos	db
LFLL138	Mainstreaming_Impact_Evaluation_in_Nature_Conservation	https://doi.org/10.1111/conl.12180	Policy_Perspectives	Sven_Wunder	2	10	Conservation_Letters	9	2016	male	Center_for_International_Forestry_Research	Brazil	South_America	6.766	sb	0	-5		sb
LFLL138	Mainstreaming_Impact_Evaluation_in_Nature_Conservation	https://doi.org/10.1111/conl.12180	Policy_Perspectives	Kathy_Baylis	1	10	Conservation_Letters	9	2016	female	University_of_Illinois	USA	North_America	6.766	sb	0	-5		sb
LFLL149	Missing_the_Boat_on_Freshwater_Fish_Conservation_in_California	https://doi.org/10.1111/conl.12249	Letter	Peter_B_Moyle	2	10	Conservation_Letters	10	2017	male	University_of_California	USA	North_America	6.766	sb	1	-4		sb
LFLL149	Missing_the_Boat_on_Freshwater_Fish_Conservation_in_California	https://doi.org/10.1111/conl.12249	Letter	Theodore_E_Grantham	1	10	Conservation_Letters	10	2017	male	University_of_California	USA	North_America	6.766	sb	1	-4		sb
LFLL212	Ecosystem_indices_to_support_global_biodiversity_conservation	https://doi.org/10.1111/conl.12680	Letter	Emily_Nicholson	2	10	Conservation_Letters	13	2020	female	Deakin_University	Australia	Oceania	6.766	sb	4	-1		sb
LFLL212	Ecosystem_indices_to_support_global_biodiversity_conservation	https://doi.org/10.1111/conl.12680	Letter	Jessica_A_Rowland	1	10	Conservation_Letters	13	2020	female	Deakin_University	Australia	Oceania	6.766	sb	4	-1		sb
LFLL204	Molecular_tools_for_coral_reef_restoration:_Beyond_biomarker_discovery	https://doi.org/10.1111/conl.12687	Review	Carly_D_Kenkel	2	10	Conservation_Letters	13	2020	female	University_of_Southern_California	USA	North_America	6.766	sb	4	-1		sb
LFLL204	Molecular_tools_for_coral_reef_restoration:_Beyond_biomarker_discovery	https://doi.org/10.1111/conl.12687	Review	John_Everett_Parkinson	1	10	Conservation_Letters	13	2020	male	SECORE_International	USA	North_America	6.766	sb	4	-1		sb
LMDV465	Compounding_the_Disturbance:_Family_Forest_Owner_Reactions_to_Invasive_Forest_Insects	https://doi.org/10.1016/j.ecolecon.2019.106461	analysis	Marla_Lindsay	1	10	Ecological_Economics	167	2020	female	University of Massachusetts	USA	North_America	4.482	sb	4	-1		sb
LMDV465	Compounding_the_Disturbance:_Family_Forest_Owner_Reactions_to_Invasive_Forest_Insects	https://doi.org/10.1016/j.ecolecon.2019.106461	analysis	Jonathan_Thompson	2	10	Ecological_Economics	167	2020	male	Harvard_University	USA	North_America	4.482	sb	4	-1		sb
BSR29	Evaluating_the_process_of_ecological_restoration	http://dx.doi.org/10.5751/ES-08289-210141	Research_article	Scott_D._Wilson	2	10	Ecology_and_Society	21	2016	male	University_of_Regina	Canada	North_America	3,89	db	0	0		db
BSR29	Evaluating_the_process_of_ecological_restoration	http://dx.doi.org/10.5751/ES-08289-210141	Research_article	Christer_Nilsson	1	10	Ecology_and_Society	21	2016	male	Umeå_University	Sweden	Europe	3,89	db	0	0		db
BSR80	A_comparative_appraisal_of_the_resilience_of_marine_social-ecological_systems_to_mass_mortalities_of_bivalves	http://dx.doi.org/10.5751/ES-09084-220146	Research_article	Patrice_Guillotreau	1	10	Ecology_and_Society	22	2017	female	University_of_Nantes	France	Europe	3,89	db	1	1		db
BSR80	A_comparative_appraisal_of_the_resilience_of_marine_social-ecological_systems_to_mass_mortalities_of_bivalves	http://dx.doi.org/10.5751/ES-09084-220146	Research_article	Tetsuo_Seki	2	10	Ecology_and_Society	22	2017	male	Japan_Fisheries_Science_and_Technology_Association	Japan	Asia	3,89	db	1	1		db
BSR95	The_role_of_law_in_adaptive_governance	http://dx.doi.org/10.5751/ES-08731-220130	Insight	Barbara_A_Cosens	1	10	Ecology_and_Society	22	2017	female	University_of_Idaho_College_of_Law	USA	North_America	3,89	db	1	1		db
BSR95	The_role_of_law_in_adaptive_governance	http://dx.doi.org/10.5751/ES-08731-220130	Insight	Edella_Schlager	2	10	Ecology_and_Society	22	2017	female	University_of_Arizona	USA	North_America	3,89	db	1	1		db
LMDV17	Has_“Grain_for_Green”_threaten_food_security_on_the_Loess_Plateau_of_China?	https://doi.org/10.1080/20964129.2019.1709560	Article	Peng_Shi	1	10	Ecosystem_Health_and_Sustainability	6	2020	male	Xian_University_of_Technology	China	Asia	2.315	db	4	4		db
LMDV17	Has_“Grain_for_Green”_threaten_food_security_on_the_Loess_Plateau_of_China?	https://doi.org/10.1080/20964129.2019.1709560	Article	Lie_Xiao	2	10	Ecosystem_Health_and_Sustainability	6	2020	male	Xian_University_of_Technology	China	Asia	2.315	db	4	4		db
LMDV20	_Soil_fauna_diversity_at_different_stages_of_reed_restoration_in_a_lakeshore_wetland_at_Lake_Taihu,_China	https://doi.org/10.1080/20964129.2020.1722034	Article	Wei_Li	1	10	Ecosystem_Health_and_Sustainability	6	2020	male	Chinese_Academy_of_Forest	China	Asia	2.315	db	4	4		db
LMDV20	_Soil_fauna_diversity_at_different_stages_of_reed_restoration_in_a_lakeshore_wetland_at_Lake_Taihu,_China	https://doi.org/10.1080/20964129.2020.1722034	Article	Xu_Pan	2	10	Ecosystem_Health_and_Sustainability	6	2020	male	Chinese_Academy_of_Forest	China	Asia	2.315	db	4	4		db
LMDV553	Deceptive_pollination_of_Calanthe_by_skippers_that_commonly_act_as_nectar_thieves	https://doi.org/10.1111/ens.12386	Short_communication	Huolin_Luo	1	10	Entomological_Science	23	2020	male	Jiangxi Key Laboratory of Plant Resources, School of Life Science, Nanchang University, Nanchang, China	China	Asia	1.074	sb	4	-1		sb
LMDV553	Deceptive_pollination_of_Calanthe_by_skippers_that_commonly_act_as_nectar_thieves	https://doi.org/10.1111/ens.12386	Short_communication	Zongxin_Ren	2	10	Entomological_Science	23	2020	male	Key Laboratory of Biodiversity and Bio‐geography, Kunming Institute of Botany, Chinese Academy of Sciences, Kunming, China	China	Asia	1.074	sb	4	-1		sb
LFLL243	Differences_in_meristem_size_and_expression_of_branching_genes_are_associated_with_variation_in_panicle_phenotype_in_wild_and_domesticated_African_rice	https://doi.org/10.1186/s13227-017-0065-y	Research_article	Kim_Nhung_Ta	1	10	EvoDevo	8	2017	female	Université_de_Montpellier	France	Europe	2.146	sb	1	-4		sb
LFLL243	Differences_in_meristem_size_and_expression_of_branching_genes_are_associated_with_variation_in_panicle_phenotype_in_wild_and_domesticated_African_rice	https://doi.org/10.1186/s13227-017-0065-y	Research_article	Stephan_Jouannic	2	10	EvoDevo	8	2017	male	Université_de_Montpellier	France	Europe	2.146	sb	1	-4		sb
CCS510	Sociodemographic_factors_modulate_the_spatial_response_of_brown_bears_to_vacancies_created_by_hunting	https://doi.org/10.1111/1365-2656.12767	Research_article	Andreas_Zedrosser	1	10	Journal_of_Animal_Ecology	87	2018	male	University College of Southeast Norway, Telemark, Norway	Norway	Europe	4.554	sb	2	-3		sb
CCS510	Sociodemographic_factors_modulate_the_spatial_response_of_brown_bears_to_vacancies_created_by_hunting	https://doi.org/10.1111/1365-2656.12767	Research_article	Shane_C_Frank	1	10	Journal_of_Animal_Ecology	87	2018	male	University College of Southeast Norway, Telemark, Norway	Norway	Europe	4.554	sb	2	-3		sb
CCS511	Divergent_migration_within_lake_sturgeon_(Acipenser_fulvescens)_populations:_Multiple_distinct_patterns_exist_across_an_unrestricted_migration_corridor	https://doi.org/10.1111/1365-2656.12772	Research_article	Charles_C_Krueger	2	10	Journal_of_Animal_Ecology	87	2018	male	Department of Fisheries and Wildlife, Center for Systems Integration and Sustainability, Michigan State University, East Lansing, MI, USA	USA	North_America	4.554	sb	2	-3		sb
CCS511	Divergent_migration_within_lake_sturgeon_(Acipenser_fulvescens)_populations:_Multiple_distinct_patterns_exist_across_an_unrestricted_migration_corridor	https://doi.org/10.1111/1365-2656.12772	Research_article	Steven_T_Kessel	1	10	Journal_of_Animal_Ecology	87	2018	male	Center for Systems Integration and Sustainability, Michigan State University, East Lansing, MI, USA	USA	North_America	4.554	sb	2	-3		sb
LFLL387	Forest_diversity_promotes_individual_tree_growth_in_central_European_forest_stands	https://doi.org/10.1111/1365-2664.12783	Review	Juliette_Chamagne	1	10	Journal_of_Applied_Ecology	54	2017	female	University_of_Zurich	Switzerland	Europe	5,84	sb	1	-4		sb
LFLL387	Forest_diversity_promotes_individual_tree_growth_in_central_European_forest_stands	https://doi.org/10.1111/1365-2664.12783	Review	Andy_Hector	2	10	Journal_of_Applied_Ecology	54	2017	male	University_of_Oxford	UK	Europe	5,84	sb	1	-4		sb
LFLL420	The_added_value_of_including_key_microbial_traits_to_determine_nitrogen‐related_ecosystem_services_in_managed_grasslands	https://doi.org/10.1111/1365-2664.13010	Review	Jean-Christophe_Clément	2	10	Journal_of_Applied_Ecology	55	2018	male	Université_Joseph_Fourier	France	Europe	5,84	sb	2	-3		sb
LFLL420	The_added_value_of_including_key_microbial_traits_to_determine_nitrogen‐related_ecosystem_services_in_managed_grasslands	https://doi.org/10.1111/1365-2664.13010	Review	Thomas_Pommier	1	10	Journal_of_Applied_Ecology	55	2018	male	Institut_National_de_la_Recherche_Agronomique	France	Europe	5,84	sb	2	-3		sb
LFLL445	Top_soil_removal_reduces_water_pollution_from_phosphorus_and_dissolved_organic_matter_and_lowers_methane_emissions_from_rewetted_peatlands	https://doi.org/10.1111/1365-2664.12931	Research_article	Dominik_Zak	1	10	Journal_of_Applied_Ecology	55	2018	male	Leibniz_Institute_of_Freshwater_Ecology_and_Inland_Fisheries	Germany	Europe	5,84	sb	2	-3		sb
LFLL454	Mutualistic_interactions_amplify_saltmarsh_restoration_success	https://doi.org/10.1111/1365-2664.12960	Research_article	Marlous_Derksen-Hooijberg	1	10	Journal_of_Applied_Ecology	55	2018	male	Radboud_University	The_Netherlands	Europe	5,84	sb	2	-3		sb
LFLL454	Mutualistic_interactions_amplify_saltmarsh_restoration_success	https://doi.org/10.1111/1365-2664.12960	Research_article	Tjisse_van_der_Heide	2	10	Journal_of_Applied_Ecology	55	2018	male	Radboud_University	The_Netherlands	Europe	5,84	sb	2	-3		sb
LFLL445	Top_soil_removal_reduces_water_pollution_from_phosphorus_and_dissolved_organic_matter_and_lowers_methane_emissions_from_rewetted_peatlands	https://doi.org/10.1111/1365-2664.12931	Research_article	Robert_McInnes	2	10	Journal_of_Applied_Ecology	55	2018	male	RM_Wetlands_&_Environment_Ltd.	UK	Europe	5,84	sb	2	-3		sb
LFLL482	Integrating_diverse_social_and_ecological_motivations_to_achieve_landscape_restoration	https://doi.org/10.1111/1365-2664.13248	Commentary	Rachel_J_Standish	2	10	Journal_of_Applied_Ecology	56	2019	female	Murdoch_University	Australia	Oceania	5,84	sb	3	-2		sb
LFLL482	Integrating_diverse_social_and_ecological_motivations_to_achieve_landscape_restoration	https://doi.org/10.1111/1365-2664.13248	Commentary	Sacha_Jellinek	1	10	Journal_of_Applied_Ecology	56	2019	male	Greening_Australia	Australia	Oceania	5,84	sb	3	-2		sb
LFLL494	Low‐intensity_management_benefits_solitary_bees_in_olive_groves	https://doi.org/10.1111/1365-2664.13511	Research_article	Carlos_Martínez-Núñez	1	10	Journal_of_Applied_Ecology	57	2020	male	Universidad_de_Jaén	Spain	Europe	5,84	sb	4	-1		sb
LFLL494	Low‐intensity_management_benefits_solitary_bees_in_olive_groves	https://doi.org/10.1111/1365-2664.13511	Research_article	Pedro_J_Rey	2	10	Journal_of_Applied_Ecology	57	2020	male	Universidad_de_Jaén	Spain	Europe	5,84	sb	4	-1		sb
MBS368	Immediate_and_carry‐over_effects_of_insect_outbreaks_on_vegetation_growth_in_West_Greenland_assessed_from_cells_to_satellite	https://doi.org/10.1111/jbi.13644	Original_article	Signe_Normand	2	10	Journal_of_Biogeography	47	2020	female	Aarhus_University	Denmark	Europe	3.723	sb	4	-1		sb
MBS368	Immediate_and_carry‐over_effects_of_insect_outbreaks_on_vegetation_growth_in_West_Greenland_assessed_from_cells_to_satellite	https://doi.org/10.1111/jbi.13644	Original_article	Angela_Luisa_Prendin	1	10	Journal_of_Biogeography	47	2020	female	University_of_Padova	Italy	Europe	3.723	sb	4	-1		sb
CCS	Phylogeography of Artemisia frigida (Anthemideae, Asteraceae) based on genotyping-by-sequencing and plastid DNA data: Migration through Beringia	/doi/10.1111/jeb.13960	RESEARCH ARTICLE	Khurelpurev Oyundelger	1	10	Journal_of_evolutionary_biology	35	2022	female	Chair of Biodiversity of Higher Plants, International Institute (IHI) Zittau, Technische Universität Dresden, Zittau, Germany	Germany	Europe	2.541	db	4		pos	db
CCS	Phylogeography of Artemisia frigida (Anthemideae, Asteraceae) based on genotyping-by-sequencing and plastid DNA data: Migration through Beringia	/doi/10.1111/jeb.13960	RESEARCH ARTICLE	Christiane M. Ritz	2	10	Journal_of_evolutionary_biology	35	2022	female	Chair of Biodiversity of Higher Plants, International Institute (IHI) Zittau, Technische Universit<U+8FB0>t Dresden, Zittau, Germany	Germany	Europe	2.541	db	4		pos	db
MBS136	The_invasive_potential_of_a_hybrid_species:_insights_from_soil_chemical_properties_and_soil_microbial_communities	https://doi.org/10.1093/jpe/rtz050	Research_article	Feng_Sun	1	10	Journal_of_Plant_Ecology	13	2020	female	South_China_Normal_University	China	Asia	1.833	sb	4	-1		sb
MBS136	The_invasive_potential_of_a_hybrid_species:_insights_from_soil_chemical_properties_and_soil_microbial_communities	https://doi.org/10.1093/jpe/rtz050	Research_article	Changlian_Peng	2	10	Journal_of_Plant_Ecology	13	2020	male	South_China_Normal_University	China	Asia	1.833	sb	4	-1		sb
BSR	Habitat management as a generalized tool to boost European rabbit Oryctolagus cuniculus populations in the Iberian Peninsula: a cost-effectiveness analysis	/doi/10.1111/mam.12006	Review	Catarina Ferreira	1	10	Mammal_review	44	2014	female	Instituto de Investigaci<U+5766>n en Recursos Cineg<U+8FBF>ticos (IREC-CSIC-UCLM-JCCM), Ronda de Toledo, s/n, 13071 Ciudad Real, Spain	Spain	Europe	2.804	db	3		pos	db
BSR	Habitat management as a generalized tool to boost European rabbit Oryctolagus cuniculus populations in the Iberian Peninsula: a cost-effectiveness analysis	/doi/10.1111/mam.12006	Review	Miguel Delibes-Mateos	2	10	Mammal_review	44	2014	male	NA	Spain	Europe	2.804	db	3		pos	db
CCS	Environmental Change, If Unaccounted, Prevents Detection of Cryptic Evolution in a Wild Population	https://doi/10.1086/711874	Research_Paper	Tomos Potter	1	10	The_American_Naturalist	197	2021	male	Department of Zoology, University of Oxford, Oxford OX1 3PS, United Kingdom	UK	cont	2.541	db	4		pos	db
CCS	Environmental Change, If Unaccounted, Prevents Detection of Cryptic Evolution in a Wild Population	https://doi/10.1086/711874	Research_Paper	Tim Coulson	2	10	The_American_Naturalist	193	2021	male	Department of Zoology, University of Oxford, Oxford OX1 3PS, United Kingdom	UK	cont	2.541	db	4		pos	db
AN42	Low Demographic Variability in Wild Primate Populations: Fitness Impacts of Variation, Covariation, and Serial Correlation in Vital Rates	https://doi/10.1086/657443	E-article	Karen B. Strier	2	10	The_American_Naturalist	177	2011	female	1. Department of Biology, Duke University, Durham, North Carolina 27708;2. Department of Ecology and Evolutionary Biology, Princeton University, Princeton, New Jersey 08544;3. Institute of Primate Research, National Museums of Kenya, Nairobi, Kenya;4. Department of Anthropology, University of North Carolina, Charlotte, North Carolina 28223;5. Department of Ecology, Evolution, and Environmental Bi…	USA	North_America	2541	db	-4		pre	sb
AN41	Low Demographic Variability in Wild Primate Populations: Fitness Impacts of Variation, Covariation, and Serial Correlation in Vital Rates	https://doi/10.1086/657443	E-article	William F. Morris	1	10	The_American_Naturalist	177	2011	male	1. Department of Biology, Duke University, Durham, North Carolina 27708;2. Department of Ecology and Evolutionary Biology, Princeton University, Princeton, New Jersey 08544;3. Institute of Primate Research, National Museums of Kenya, Nairobi, Kenya;4. Department of Anthropology, University of North Carolina, Charlotte, North Carolina 28223;5. Department of Ecology, Evolution, and Environmental Bi…	USA	North_America	2541	db	-4		pre	sb
BSR571	Resighting_data_reveal_weak_connectivity_from_wintering_to_breeding_grounds_in_a_range-restricted_and_endangered_long-distance_migratory_passerine	http://dx.doi.org/10.5751/ACE-01159-130109	Research_article	Nathan_W_Cooper	1	9	Avian_Conservation_and_Ecology	13	2018	male	Smithsonian_Migratory_Bird_Center	USA	North_America	2.541	db	2	2		db
BSR571	Resighting_data_reveal_weak_connectivity_from_wintering_to_breeding_grounds_in_a_range-restricted_and_endangered_long-distance_migratory_passerine	http://dx.doi.org/10.5751/ACE-01159-130109	Research_article	Peter_P_Marra	2	9	Avian_Conservation_and_Ecology	13	2018	male	Smithsonian_Migratory_Bird_Center	USA	North_America	2.541	db	2	2		db
LFLL37	Building_a_database_for_long-term_monitoring_of_benthic_macrofauna_in_the_Pertuis-Charentais_(2004-2014)	https://doi.org/10.3897/BDJ.5.e10288	Data_Paper	Anne_Philippe	1	9	Biodiversity_Data_Journal	5	2017	female	Université_de_la_Rochelle	France	Europe	1,33	sb	1	-4		sb
LFLL37	Building_a_database_for_long-term_monitoring_of_benthic_macrofauna_in_the_Pertuis-Charentais_(2004-2014)	https://doi.org/10.3897/BDJ.5.e10288	Data_Paper	Pierrick_Bocher	2	9	Biodiversity_Data_Journal	5	2017	male	Université_de_la_Rochelle	France	Europe	1,33	sb	1	-4		sb
LFLL41	Guidelines_for_collecting_vouchers_and_tissues_intended_for_genomic_work_(Smithsonian_Institution):_Botany_Best_Practices	https://doi.org/10.3897/BDJ.5.e11625	Methods	Vicki_Funk	1	9	Biodiversity_Data_Journal	5	2017	female	Smithsonian_Institution	USA	North_America	1,33	sb	1	-4		sb
LFLL41	Guidelines_for_collecting_vouchers_and_tissues_intended_for_genomic_work_(Smithsonian_Institution):_Botany_Best_Practices	https://doi.org/10.3897/BDJ.5.e11625	Methods	Jonathan_Coddington	2	9	Biodiversity_Data_Journal	5	2017	male	Smithsonian_Institution	USA	North_America	1,33	sb	1	-4		sb
LFLL66	Herbarium_collection_of_the_Rio_de_Janeiro_Botanical_Garden_(RB),_Brazil	https://doi.org/10.3897/BDJ.6.e22757	Data_Paper	Rafaela_Forzza	2	9	Biodiversity_Data_Journal	6	2018	female	Rio_de_Janeiro_Botanical_Garden	Brazil	South_America	1,33	sb	2	-3		sb
LFLL66	Herbarium_collection_of_the_Rio_de_Janeiro_Botanical_Garden_(RB),_Brazil	https://doi.org/10.3897/BDJ.6.e22757	Data_Paper	João_Lanna	1	9	Biodiversity_Data_Journal	6	2018	male	Rio_de_Janeiro_Botanical_Garden	Brazil	South_America	1,33	sb	2	-3		sb
LFLL69	DNA_barcoding_data_release_for_Coleoptera_from_the_Gunung_Halimun_canopy_fogging_workpackage_of_the_Indonesian_Biodiversity_Information_System_(IndoBioSys)_project	https://doi.org/10.3897/BDJ.7.e31432	Research_article	Bruno_Cancian_de_Araujo	1	9	Biodiversity_Data_Journal	7	2019	male	Zoologische_Staatssammlung_München	Germany	Europe	1,33	sb	3	-2		sb
LFLL69	DNA_barcoding_data_release_for_Coleoptera_from_the_Gunung_Halimun_canopy_fogging_workpackage_of_the_Indonesian_Biodiversity_Information_System_(IndoBioSys)_project	https://doi.org/10.3897/BDJ.7.e31432	Research_article	Michael_Balke	2	9	Biodiversity_Data_Journal	7	2019	male	Zoologische_Staatssammlung_München	Germany	Europe	1,33	sb	3	-2		sb
LFLL124	Designing_an_Herbarium_Digitisation_Workflow_with_Built-In_Image_Quality_Management	https://doi.org/10.3897/BDJ.8.e47051	Methods	Quentin_Groom	2	9	Biodiversity_Data_Journal	8	2020	male	Botanic_Garden_Meise	Belgium	Europe	1,33	sb	4	-1		sb
LFLL124	Designing_an_Herbarium_Digitisation_Workflow_with_Built-In_Image_Quality_Management	https://doi.org/10.3897/BDJ.8.e47051	Methods	Abraham_Nieva_de_la_Hidalga	1	9	Biodiversity_Data_Journal	8	2020	male	Cardiff_University	UK	Europe	1,33	sb	4	-1		sb
CCS631	First_report_of_Northern_brown_shrimp_Penaeus_aztecus_Ives,_1891_in_Strait_of_Sicily	https://doi.org/10.3391/bir.2017.6.1.11	Research_article	Danilo_Scannella	1	9	Bioinvasions_Records	6	2017	male	Consiglio Nazionale delle Ricerche	Italy	Europe	1,5	db	1	1		db
CCS631	First_report_of_Northern_brown_shrimp_Penaeus_aztecus_Ives,_1891_in_Strait_of_Sicily	https://doi.org/10.3391/bir.2017.6.1.11	Research_article	Francesco_Colloca	2	9	Bioinvasions_Records	6	2017	male	Consiglio Nazionale delle Ricerche	Italy	Europe	1,5	db	1	1		db
CCS653	First_records_of_the_mourning_gecko_(Lepidodactylus_lugubris_Duméril_and_Bibron,_1836),_common_house_gecko_(Hemidactylus_frenatus_in_Duméril,_1836),_and_Tokay_gecko_(Gekko_gecko_Linnaeus,_1758)_on_Curaçao,_Dutch_Antilles,_and_remarks_on_their_Caribbean_distributions	https://doi.org/10.3391/bir.2019.8.1.04	Rapid_Communication	Jocelyn_E_Behm	1	9	Bioinvasions_Records	8	2019	female	Integrative Ecology Lab, Center for Biodiversity, Department of Biology, Temple University, 1925 N. 12th Street, Philadelphia, PA 19122, USA	USA	North_America	1,5	db	3	3		db
CCS653	First_records_of_the_mourning_gecko_(Lepidodactylus_lugubris_Duméril_and_Bibron,_1836),_common_house_gecko_(Hemidactylus_frenatus_in_Duméril,_1836),_and_Tokay_gecko_(Gekko_gecko_Linnaeus,_1758)_on_Curaçao,_Dutch_Antilles,_and_remarks_on_their_Caribbean_distributions	https://doi.org/10.3391/bir.2019.8.1.04	Rapid_Communication	Matthew_R._Helmus	2	9	Bioinvasions_Records	8	2019	male	Integrative Ecology Lab, Center for Biodiversity, Department of Biology, Temple University, 1925 N. 12th Street, Philadelphia, PA 19122, USA	USA	North_America	1,5	db	3	3		db
CCS678	Distribution_of_the_alien_species_Callinectes_sapidus_(Rathbun,_1896)_in_Sardinian_waters_(western_Mediterranean)	https://doi.org/10.3391/bir.2020.9.1.09	Rapid_Communication	Jacopo_Culurgioni	1	9	Bioinvasions_Records	9	2020	male	AGRIS, Agricultural Research Agency of Sardinia, SS 291 Sassari-Fertilia, Km 18,600, 07100 Sassari, Italy	Italy	Europe	1,5	db	4	4		db
CCS678	Distribution_of_the_alien_species_Callinectes_sapidus_(Rathbun,_1896)_in_Sardinian_waters_(western_Mediterranean)	https://doi.org/10.3391/bir.2020.9.1.09	Rapid_Communication	Nicola_Fois	2	9	Bioinvasions_Records	9	2020	male	AGRIS, Agricultural Research Agency of Sardinia, SS 291 Sassari-Fertilia, Km 18,600, 07100 Sassari, Italy	Italy	Europe	1,5	db	4	4		db
MBS207	Inferring_the_biogeography_and_demographic_history_of_an_endangered_butterfly_in_Europe_from_multilocus_markers	https://doi.org/10.1093/biolinnean/bly160	Original_article	Laurence_Després	1	9	Biological_Journal_Of_The_Linnean_Society	126	2019	female	Université_Grenoble_Alpes	France	Europe	1,96	sb	3	-2		sb
MBS207	Inferring_the_biogeography_and_demographic_history_of_an_endangered_butterfly_in_Europe_from_multilocus_markers	https://doi.org/10.1093/biolinnean/bly160	Original_article	Gentile_Francesco_Ficetola	2	9	Biological_Journal_Of_The_Linnean_Society	126	2019	male	Université_Grenoble_Alpes	France	Europe	1,96	sb	3	-2		sb
CCS101	Changes_in_duration_of_reproductive_phases_and_lagged_phenological_response_to_experimental_climate_warming	https://doi.org/10.1080/17550874.2011.557669	Article	Rebecca_A_Sherry	1	9	Botanical_Journal_of_Scotland	4	2011	female	Department of Botany and Microbiology , University of Oklahoma , Norman, USA Correspondencersherry@ou.edu	USA	North_America	1,2	db	1	1	pos	db
CCS101	Changes_in_duration_of_reproductive_phases_and_lagged_phenological_response_to_experimental_climate_warming	https://doi.org/10.1080/17550874.2011.557669	Article	Yiqi_Luo	2	9	Botanical_Journal_of_Scotland	4	2011	male	Department of Botany and Microbiology , University of Oklahoma , Norman, USA Correspondencersherry@ou.edu	USA	North_America	1,2	db	1	1	pos	db
CCS119	The_carbon_and_nitrogen_biogeochemistry_of_a_montane_Norway_spruce_(Picea_abies_(L.)_Karst.)_forest:_a_synthesis_of_long-term_research	https://doi.org/10.1080/17550874.2012.695813	Short_communication	Gabriele_Fuchs	2	9	Botanical_Journal_of_Scotland	5	2012	female	Forest Research and Training Center for Forests, Natural Hazards and Landscape (BFW), Forest Ecology and Soils , Vienna , Austria Correspondencerobert.jandl@bfw.gv.at	Austria	Europe	1,2	db	2	2	pos	db
CCS119	The_carbon_and_nitrogen_biogeochemistry_of_a_montane_Norway_spruce_(Picea_abies_(L.)_Karst.)_forest:_a_synthesis_of_long-term_research	https://doi.org/10.1080/17550874.2012.695813	Short_communication	Robert_Jandl	1	9	Botanical_Journal_of_Scotland	5	2012	male	Forest Research and Training Center for Forests, Natural Hazards and Landscape (BFW), Forest Ecology and Soils , Vienna , Austria Correspondencerobert.jandl@bfw.gv.at	Austria	Europe	1,2	db	2	2	pos	db
CCS	Ecosystem productivity and carbon cycling in intact and annually burnt forest at the dry southern limit of the Amazon rainforest (Mato Grosso, Brazil)	10.1080/17550874.2013.798368	Research article	Wanderley Rocha	1	9	Botanical_Journal_of_Scotland	7	2014	male	Amazon Environmental Research Institute (IPAM) , Canarana , Mato Grosso , Brazil ; Universidade do Estado do Mato Grosso , Novo Xavantina , Mato Grosso , Brazil	Brazil			db	4	4	pos	db
CCS	Ecosystem productivity and carbon cycling in intact and annually burnt forest at the dry southern limit of the Amazon rainforest (Mato Grosso, Brazil)	10.1080/17550874.2013.798368	Research article	Yadvinder Malhi	2	9	Botanical_Journal_of_Scotland	7	2014	male	Environmental Change Institute, School of Geography and the Environment, University of Oxford , UK	UK			db	4	4	pos	db
LMDV148	Reduced_Effect_of_Tasmanian_Devil_Facial_Tumor_Disease_at_the_Disease_Front	https://doi.org/10.1111/j.1523-1739.2011.01747.x	Contributed_papers	Hamish_McCallum	2	9	Conservation_Biology	26	2012	male	Griffith University	Australia	Oceania	5.405	db	-2	-2	pre	sb
LMDV148	Reduced_Effect_of_Tasmanian_Devil_Facial_Tumor_Disease_at_the_Disease_Front	https://doi.org/10.1111/j.1523-1739.2011.01747.x	Contributed_papers	Rodrigo_Hamede	1	9	Conservation_Biology	26	2012	male	University of Tasmania	Australia	Oceania	5.405	db	-2	-2	pre	sb
LMDV162	Graduate_Student's_Guide_to_Necessary_Skills_for_Nonacademic_Conservation_Careers	https://doi.org/10.1111/j.1523-1739.2012.01956.x	Conservation_Practice_and_Policy	Jessica_L_Blickley	1	9	Conservation_Biology	27	2013	female	University of California	USA	North_America	5.405	db	-1	-1	pre	sb
LMDV162	Graduate_Student's_Guide_to_Necessary_Skills_for_Nonacademic_Conservation_Careers	https://doi.org/10.1111/j.1523-1739.2012.01956.x	Conservation_Practice_and_Policy	Mark_W_Schwartz	2	9	Conservation_Biology	27	2013	male	University of California	USA	North_America	5.405	db	-1	-1	pre	sb
LMDV299	Trade-offs_and_efficiencies_in_optimal_budget-constrained_multispecies_corridor_networks	https://doi.org/10.1111/cobi.12814	contributed_papers	Bistra_Dilkina	1	9	Conservation_Biology	31	2017	female	Georgia Institute of Technology	USA	North_America	5.405	db	1	1	pos	db
LMDV299	Trade-offs_and_efficiencies_in_optimal_budget-constrained_multispecies_corridor_networks	https://doi.org/10.1111/cobi.12814	contributed_papers	Michael_Schwartz	2	9	Conservation_Biology	31	2017	male	U.S. Forest Service Rocky Mountain Research Station	USA	North_America	5.405	db	1	1	pos	db
BSR	Diverging response patterns of terrestrial and aquatic species to hydromorphological restoration	https://conbio.onlinelibrary.wiley.com/doi/10.1111/cobi.13176	Contributed papers	Francesca P	1	9	Conservation_Biology	33	2019	female		Germany			db	3	3	pos	db
BSR	Diverging response patterns of terrestrial and aquatic species to hydromorphological restoration	https://conbio.onlinelibrary.wiley.com/doi/10.1111/cobi.13176	Contributed papers	Peter H	2	9	Conservation_Biology	33	2019	male		Germany			db	3	3	pos	db
LFLL136	Evaluating_Trade‐Offs_between_Target_Persistence_Levels_and_Numbers_of_Species_Conserved	https://doi.org/10.1111/conl.12179	Letter	Martina_MI_Di_Fonzo	1	9	Conservation_Letters	9	2016	female	University_of_Queensland	Australia	Oceania	6.766	sb	0	-5		sb
LFLL136	Evaluating_Trade‐Offs_between_Target_Persistence_Levels_and_Numbers_of_Species_Conserved	https://doi.org/10.1111/conl.12179	Letter	Richard_F_Maloney	2	9	Conservation_Letters	9	2016	male	Department_of_Conservation	New_Zealand	Oceania	6.766	sb	0	-5		sb
LFLL148	Integrating_Expert_Perceptions_into_Food_Web_Conservation_and_Management	https://doi.org/10.1111/conl.12245	Letter	Adrian_C_Stier	1	9	Conservation_Letters	10	2017	male	National_Center_for_Ecological_Analysis_and_Synthesis	USA	North_America	6.766	sb	1	-4		sb
LFLL148	Integrating_Expert_Perceptions_into_Food_Web_Conservation_and_Management	https://doi.org/10.1111/conl.12245	Letter	Phillip_S_Levin	2	9	Conservation_Letters	10	2017	male	National_Oceanic_&_Atmospheric_Administration	USA	North_America	6.766	sb	1	-4		sb
BSR43	Pathogens,_disease,_and_the_social-ecological_resilience_of_protected_areas	http://dx.doi.org/10.5751/ES-07984-210120	Insight	Alta_De_Vos	1	9	Ecology_and_Society	21	2016	female	University_of_Cape_Town	South_Africa	Africa	3,89	db	0	0		db
BSR43	Pathogens,_disease,_and_the_social-ecological_resilience_of_protected_areas	http://dx.doi.org/10.5751/ES-07984-210120	Insight	Christine_Moore	2	9	Ecology_and_Society	21	2016	female	University_of_Cape_Town	South_Africa	Africa	3,89	db	0	0		db
BSR22	Operationalizing_ecosystem-based_adaptation:_harnessing_ecosystem_services_to_buffer_communities_against_climate_change	http://dx.doi.org/10.5751/ES-08266-210131	Research_article	Christine_Wamsler	1	9	Ecology_and_Society	21	2016	female	Lund_University_Centre_for_Sustainability_Studies_(LUCSUS)	Sweden	Europe	3,89	db	0	0		db
BSR22	Operationalizing_ecosystem-based_adaptation:_harnessing_ecosystem_services_to_buffer_communities_against_climate_change	http://dx.doi.org/10.5751/ES-08266-210131	Research_article	Sanna_Stålhammar	2	9	Ecology_and_Society	21	2016	female	Lund_University_Centre_for_Sustainability_Studies_(LUCSUS)	Sweden	Europe	3,89	db	0	0		db
BSR116	Stories_in_social-ecological_knowledge_cocreation	http://dx.doi.org/10.5751/ES-09932-230123	Research_article	Diego_Galafassi	1	9	Ecology_and_Society	23	2018	male	Stockholm_University	Sweden	Europe	3,89	db	2	2		db
BSR140	Polycentric_governance_in_telecoupled_resource_systems	http://dx.doi.org/10.5751/ES-09902-230116	Synthesis	Christoph_Oberlack	1	9	Ecology_and_Society	23	2018	male	_University_of_Bern	Switzerland	Europe	3,89	db	2	2		db
BSR140	Polycentric_governance_in_telecoupled_resource_systems	http://dx.doi.org/10.5751/ES-09902-230116	Synthesis	Urs_Wiesmann	2	9	Ecology_and_Society	23	2018	male	_University_of_Bern	Switzerland	Europe	3,89	db	2	2		db
BSR116	Stories_in_social-ecological_knowledge_cocreation	http://dx.doi.org/10.5751/ES-09932-230123	Research_article	Katrina_Brown	2	9	Ecology_and_Society	23	2018	female	University_of_Exeter	UK	Europe	3,89	db	2	2		db
LFLL252	Evolutionary_loss_of_melanogenesis_in_the_tunicate_Molgula_occulta	https://doi.org/10.1186/s13227-017-0074-x	Research_article	Claudia_Racioppi	1	9	EvoDevo	8	2017	female	Stazione_Zoologica_Anton_Dohrn	Italy	Europe	2.146	sb	1	-4		sb
LFLL252	Evolutionary_loss_of_melanogenesis_in_the_tunicate_Molgula_occulta	https://doi.org/10.1186/s13227-017-0074-x	Research_article	Filomena_Ristoratore	2	9	EvoDevo	8	2017	female	Stazione_Zoologica_Anton_Dohrn	Italy	Europe	2.146	sb	1	-4		sb
LFLL288	A_two-level_model_for_the_role_of_complex_and_young_genes_in_the_formation_of_organism_complexity_and_new_insights_into_the_relationship_between_evolution_and_development	https://doi.org/10.1186/s13227-018-0111-4	Research_article	Dong_Yang	1	9	EvoDevo	9	2018	male	Beijing_Institute_of_Lifeomics	China	Asia	2.146	sb	2	-3		sb
LFLL288	A_two-level_model_for_the_role_of_complex_and_young_genes_in_the_formation_of_organism_complexity_and_new_insights_into_the_relationship_between_evolution_and_development	https://doi.org/10.1186/s13227-018-0111-4	Research_article	Fuchu_He	2	9	EvoDevo	9	2018	male	Beijing_Institute_of_Lifeomics	China	Asia	2.146	sb	2	-3		sb
LFLL297	Novel_budding_mode_in_Polyandrocarpa_zorritensis:_a_model_for_comparative_studies_on_asexual_development_and_whole_body_regeneration	https://doi.org/10.1186/s13227-019-0121-x	Research_article	Marta_Scelzo	1	9	EvoDevo	10	2019	female	Sorbonne_Université	France	Europe	2.146	sb	3	-2		sb
LFLL297	Novel_budding_mode_in_Polyandrocarpa_zorritensis:_a_model_for_comparative_studies_on_asexual_development_and_whole_body_regeneration	https://doi.org/10.1186/s13227-019-0121-x	Research_article	Stefano_Tiozzo	2	9	EvoDevo	10	2019	male	Sorbonne_Université	France	Europe	2.146	sb	3	-2		sb
LFLL327	The_free-living_flatworm_Macrostomum_lignano	https://doi.org/10.1186/s13227-020-00150-1	Review	Eugene_Berezikov	2	9	EvoDevo	11	2020	male	University_of_Groningen	The_Netherlands	Europe	2.146	sb	4	-1		sb
LFLL327	The_free-living_flatworm_Macrostomum_lignano	https://doi.org/10.1186/s13227-020-00150-1	Review	Jakub_Wudarski	1	9	EvoDevo	11	2020	male	University_of_Groningen	The_Netherlands	Europe	2.146	sb	4	-1		sb
CCS447	‘You_shall_not_pass!’:_quantifying_barrier_permeability_and_proximity_avoidance_by_animals	https://doi.org/10.1111/1365-2656.12275	Research_article	Hawthorne_L_Beyer	1	9	Journal_of_Animal_Ecology	85	2016	male	University of Queensland, Brisbane, Qld, 4072 Australia	Australia	Oceania	4.554	sb	0	-5		sb
CCS465	Resource_specialists_lead_local_insect_community_turnover_associated_with_temperature_–_analysis_of_an_18‐year_full‐seasonal_record_of_moths_and_beetles	https://doi.org/10.1111/1365-2656.12452	Research_article	Ole_Karsholt	2	9	Journal_of_Animal_Ecology	85	2016	male	Natural History Museum of Denmark, University of Copenhagen, Copenhagen, Denmark	Denmark	Europe	4.554	sb	0	-5		sb
CCS465	Resource_specialists_lead_local_insect_community_turnover_associated_with_temperature_–_analysis_of_an_18‐year_full‐seasonal_record_of_moths_and_beetles	https://doi.org/10.1111/1365-2656.12452	Research_article	Philip_Francis_Thomsen	1	9	Journal_of_Animal_Ecology	85	2016	male	Centre for GeoGenetics, Natural History Museum of Denmark, University of Copenhagen, Copenhagen, Denmark	Denmark	Europe	4.554	sb	0	-5		sb
CCS447	‘You_shall_not_pass!’:_quantifying_barrier_permeability_and_proximity_avoidance_by_animals	https://doi.org/10.1111/1365-2656.12275	Research_article	Jason_Matthiopoulos	2	9	Journal_of_Animal_Ecology	85	2016	male	Institute of Biodiversity Animal Health and Comparative Medicine, University of Glasgow, Glasgow, G12 8QQ UK	UK	Europe	4.554	sb	0	-5		sb
CCS528	Metapopulation_dynamics_of_roseate_terns:_Sources,_sinks_and_implications_for_conservation_management_decisions	https://doi.org/10.1111/1365-2656.12904	Research_article	Adam_Seward	1	9	Journal_of_Animal_Ecology	88	2019	male	RSPB Centre for Conservation Science, The Royal Society for the Protection of Birds, Perth, UK	UK	Europe	4.554	sb	3	-2		sb
CCS528	Metapopulation_dynamics_of_roseate_terns:_Sources,_sinks_and_implications_for_conservation_management_decisions	https://doi.org/10.1111/1365-2656.12904	Research_article	Mark_Bolton	2	9	Journal_of_Animal_Ecology	88	2019	male	RSPB Centre for Conservation Science, The Royal Society for the Protection of Birds, The Lodge, Sandy, UK	UK	Europe	4.554	sb	3	-2		sb
CCS546	Accelerating_across_the_landscape:_The_energetic_costs_of_natal_dispersal_in_a_large_herbivore	https://doi.org/10.1111/1365-2656.13098	Research_article	Laura_Benoit	1	9	Journal_of_Animal_Ecology	89	2020	female	CEFS, Université de Toulouse, INRA, Castanet‐Tolosan, France	France	Europe	4.554	sb	4	-1		sb
CCS546	Accelerating_across_the_landscape:_The_energetic_costs_of_natal_dispersal_in_a_large_herbivore	https://doi.org/10.1111/1365-2656.13098	Research_article	Nicolas_Morellet	2	9	Journal_of_Animal_Ecology	89	2020	male	CEFS, Université de Toulouse, INRA, Castanet‐Tolosan, France	France	Europe	4.554	sb	4	-1		sb
CCS540	Wind_turbines_cause_functional_habitat_loss_for_migratory_soaring_birds	https://doi.org/10.1111/1365-2656.12961	Research_article	Ana_T_Marques	1	9	Journal_of_Animal_Ecology	89	2020	female	Faculdade de Ciências, Universidade de Lisboa, Edifício C2, Campo Grande, 1749‐016 Lisboa, Portugal	Portugal	Europe	4.554	sb	4	-1		sb
CCS540	Wind_turbines_cause_functional_habitat_loss_for_migratory_soaring_birds	https://doi.org/10.1111/1365-2656.12961	Research_article	João_P_Silva	2	9	Journal_of_Animal_Ecology	89	2020	female	Universidade de Lisboa, Edifício C2, Campo Grande, 1749‐016 Lisboa, Portugal	Portugal	Europe	4.554	sb	4	-1		sb
LFLL375	Effects_of_grazing_on_soil_nitrogen_spatial_heterogeneity_depend_on_herbivore_assemblage_and_pre‐grazing_plant_diversity	https://doi.org/10.1111/1365-2664.12537	Research_article	Chen_Liu	1	9	Journal_of_Applied_Ecology	53	2016	female	Northeast_Normal_University	China	Asia	5,84	sb	0	-5		sb
LFLL375	Effects_of_grazing_on_soil_nitrogen_spatial_heterogeneity_depend_on_herbivore_assemblage_and_pre‐grazing_plant_diversity	https://doi.org/10.1111/1365-2664.12537	Research_article	Haijao_Lin	2	9	Journal_of_Applied_Ecology	53	2016	female	Northeast_Normal_University	China	Asia	5,84	sb	0	-5		sb
LFLL364	Subordinate_plants_sustain_the_complexity_and_stability_of_soil_micro‐food_webs_in_natural_bamboo_forest_ecosystems	https://doi.org/10.1111/1365-2664.12538	Research_article	Shenglei_Fu	2	9	Journal_of_Applied_Ecology	53	2016	male	Chinese_Academy_of_Sciences	China	Asia	5,84	sb	0	-5		sb
LFLL364	Subordinate_plants_sustain_the_complexity_and_stability_of_soil_micro‐food_webs_in_natural_bamboo_forest_ecosystems	https://doi.org/10.1111/1365-2664.12538	Research_article	Yuanhu_Shao	1	9	Journal_of_Applied_Ecology	53	2016	male	Chinese_Academy_of_Sciences	China	Asia	5,84	sb	0	-5		sb
LFLL405	Does_hunting_or_hiking_affect_wildlife_communities_in_protected_areas?	https://doi.org/10.1111/1365-2664.12700	Research_article	Roland_Kays	1	9	Journal_of_Applied_Ecology	54	2017	male	North_Carolina_Museum_of_Natural_Sciences	USA	North_America	5,84	sb	1	-4		sb
LFLL405	Does_hunting_or_hiking_affect_wildlife_communities_in_protected_areas?	https://doi.org/10.1111/1365-2664.12700	Research_article	William_J_McShea	2	9	Journal_of_Applied_Ecology	54	2017	male	Smithsonian_Conservation_Biology_Institute	USA	North_America	5,84	sb	1	-4		sb
LFLL449	Flow_intermittence_and_ecosystem_services_in_rivers_of_the_Anthropocene	https://doi.org/10.1111/1365-2664.12941	Commentary	Thibault_Datry	1	9	Journal_of_Applied_Ecology	55	2018	male	Institut_National_de_Recherche_en_Sciences_et_Technologies_pour_l'environnement_et_l'agriculture	France	Europe	5,84	sb	2	-3		sb
LFLL449	Flow_intermittence_and_ecosystem_services_in_rivers_of_the_Anthropocene	https://doi.org/10.1111/1365-2664.12941	Commentary	Clifford_N_Dahm	2	9	Journal_of_Applied_Ecology	55	2018	male	University_of_New_Mexico	USA	North_America	5,84	sb	2	-3		sb
LFLL490	A_united_front_against_marine_invaders:_Developing_a_cost‐effective_marine_biosecurity_surveillance_partnership_between_government_and_industry	https://doi.org/10.1111/1365-2664.13557	Practitioner's_Perspective	David_A_Abdo	2	9	Journal_of_Applied_Ecology	57	2020	male	Aquatic_Biosecurity	Australia	Oceania	5,84	sb	4	-1		sb
LFLL490	A_united_front_against_marine_invaders:_Developing_a_cost‐effective_marine_biosecurity_surveillance_partnership_between_government_and_industry	https://doi.org/10.1111/1365-2664.13557	Practitioner's_Perspective	Justin_I_McDonald	1	9	Journal_of_Applied_Ecology	57	2020	male	Aquatic_Biosecurity	Australia	Oceania	5,84	sb	4	-1		sb
MBS315	Evolutionary_history_of_the_thicket_rats_(genus_Grammomys)_mirrors_the_evolution_of_African_forests_since_late_Miocene	https://doi.org/10.1111/jbi.12890	Original_article	Erik_Verheyen	2	9	Journal_of_Biogeography	44	2017	male	University_of_Antwerp	Belgium	Europe	3.723	sb	1	-4		sb
MBS315	Evolutionary_history_of_the_thicket_rats_(genus_Grammomys)_mirrors_the_evolution_of_African_forests_since_late_Miocene	https://doi.org/10.1111/jbi.12890	Original_article	Josef_Bryja	1	9	Journal_of_Biogeography	44	2017	male	Czech_Academy_of_Sciences	Czech Republic	Europe	3.723	sb	1	-4		sb
MBS354	A_forest_canopy_as_a_living_archipelago:_Why_phylogenetic_isolation_may_increase_and_age_decrease_diversity	https://doi.org/10.1111/jbi.13469	Original_article	Jose_Hidasi‐Neto	1	9	Journal_of_Biogeography	46	2019	male	Universidade_Federal_de_Goiás	Brazil	South_America	3.723	sb	3	-2		sb
MBS354	A_forest_canopy_as_a_living_archipelago:_Why_phylogenetic_isolation_may_increase_and_age_decrease_diversity	https://doi.org/10.1111/jbi.13469	Original_article	Andreas_Prinzing	2	9	Journal_of_Biogeography	46	2019	male	Universite_de_Rennes	France	Europe	3.723	sb	3	-2		sb
MBS381	Drivers_of_bromeliad_leaf_and_floral_bract_variation_across_a_latitudinal_gradient_in_the_Atlantic_Forest	https://doi.org/10.1111/jbi.13746	Original_article	Andrea_F_Costa	2	9	Journal_of_Biogeography	47	2020	female	Universidade_Federal_do_Rio_de_Janeiro	Brazil	South_America	3.723	sb	4	-1		sb
MBS381	Drivers_of_bromeliad_leaf_and_floral_bract_variation_across_a_latitudinal_gradient_in_the_Atlantic_Forest	https://doi.org/10.1111/jbi.13746	Original_article	Beatriz_Neves	1	9	Journal_of_Biogeography	47	2020	female	Universidade_Federal_do_Rio_de_Janeiro	Brazil	South_America	3.723	sb	4	-1		sb
MBS380	Plants_are_more_likely_to_be_spiny_at_mid‐elevations_in_the_Qinghai‐Tibetan_Plateau,_south‐western_China	https://doi.org/10.1111/jbi.13724	Original_article	Bo_Song	1	9	Journal_of_Biogeography	47	2020	male	Chinese_Academy_of_Sciences	China	Asia	3.723	sb	4	-1		sb
MBS380	Plants_are_more_likely_to_be_spiny_at_mid‐elevations_in_the_Qinghai‐Tibetan_Plateau,_south‐western_China	https://doi.org/10.1111/jbi.13724	Original_article	Hang_Sun	2	9	Journal_of_Biogeography	47	2020	male	Chinese_Academy_of_Sciences	China	Asia	3.723	sb	4	-1		sb
MBS384	Trait‐mediated_filtering_drives_contrasting_patterns_of_species_richness_and_functional_diversity_across_montane_bird_assemblages	https://doi.org/10.1111/jbi.13738	Original_article	Qiang_Zhang	1	9	Journal_of_Biogeography	47	2020	male	Institute_of_Applied_Biological_Resources	China	Asia	3.723	sb	4	-1		sb
MBS384	Trait‐mediated_filtering_drives_contrasting_patterns_of_species_richness_and_functional_diversity_across_montane_bird_assemblages	https://doi.org/10.1111/jbi.13738	Original_article	Fasheng_Zou	2	9	Journal_of_Biogeography	47	2020	male	Institute_of_Applied_Biological_Resources	China	Asia	3.723	sb	4	-1		sb
MBS375	Unveiling_the_food_webs_of_tetrapods_across_Europe_through_the_prism_of_the_Eltonian_niche	https://doi.org/10.1111/jbi.13773	Original_article	Louise_M_J_O’Connor	1	9	Journal_of_Biogeography	47	2020	female	Université_Savoie-Mont_Blanc	France	Europe	3.723	sb	4	-1		sb
MBS375	Unveiling_the_food_webs_of_tetrapods_across_Europe_through_the_prism_of_the_Eltonian_niche	https://doi.org/10.1111/jbi.13773	Original_article	Wilfried_Thuiller	2	9	Journal_of_Biogeography	47	2020	male	Université_Grenoble_Alpes	France	Europe	3.723	sb	4	-1		sb
CCS	Sexual isolation with and without ecological isolation in marine isopods Jaera albifrons and J. praehirsuta	/doi/10.1111/jeb.13559	Special_issue	Ambre Ribardière	1	9	Journal_of_evolutionary_biology	34	2021	female	UMR 7144, Station Biologique de Roscoff, CNRS & Sorbonne Universit<U+8FBF>, Roscoff, France	France	cont	2.541	db	3		pos	db
CCS	Sexual isolation with and without ecological isolation in marine isopods Jaera albifrons and J. praehirsuta	/doi/10.1111/jeb.13559	Special_issue	Thomas Broquet	2	9	Journal_of_evolutionary_biology	34	2021	male	UMR 7144, Station Biologique de Roscoff, CNRS & Sorbonne Universit<U+8FBF>, Roscoff, France	France	cont	2.541	db	3		pos	db
CCS	How the environment shapes animal signals: a test of the acoustic adaptation hypothesis in frogs	/doi/10.1111/jeb.13210	Research Paper	Sandra Goutte	1	9	Journal_of_evolutionary_biology	31	2018	female	Muséum national d'Histoire naturelle, Institut de Systématique, Evolution, Biodiversité	France	Europe	2.541	db	0		pos	db
CCS	How the environment shapes animal signals: a test of the acoustic adaptation hypothesis in frogs	/doi/10.1111/jeb.13210	Research Paper	Frederic Legendre	2	9	Journal_of_evolutionary_biology	31	2018	male	Muséum national d'Histoire naturelle, Institut de Systématique, Evolution, Biodiversité	France	Europe	2.541	db	0		pos	db
MBS41	An_assessment_of_European_bream_Abramis_brama_(Linnaeus,_1758)_fishery_in_the_downstream_of_the_Irtysh_River_in_China	https://doi.org/10.1080/02705060.2018.1538906	Original_article	Huiping_Ding	1	9	Journal_of_Freshwater_Ecology	34	2019	female	Institute_of_Hydroecology	China	Asia	1.239	sb	3	-2		sb
MBS49	Spatial_heterogeneity_of_food_web_structure_in_a_large_shallow_eutrophic_lake_(Lake_Taihu,_China):_implications_for_eutrophication_process_and_management	https://doi.org/10.1080/02705060.2019.1581101	Original_article	Delin_Xu	1	9	Journal_of_Freshwater_Ecology	34	2019	male	Nanjing_Institute_of_Environmental_Science	China	Asia	1.239	sb	3	-2		sb
MBS41	An_assessment_of_European_bream_Abramis_brama_(Linnaeus,_1758)_fishery_in_the_downstream_of_the_Irtysh_River_in_China	https://doi.org/10.1080/02705060.2018.1538906	Original_article	Yong_Chen	2	9	Journal_of_Freshwater_Ecology	34	2019	male	University_of_Maine	USA	North_America	1.239	sb	3	-2		sb
MBS61	Effects_of_precipitation_on_soil_organic_carbon_fractions_in_three_subtropical_forests_in_southern_China	https://doi.org/10.1093/jpe/rtv027	Research_article	Xiaomei_Chen	1	9	Journal_of_Plant_Ecology	9	2016	female	Guangzhou_University	China	Asia	1.833	sb	0	-5		sb
MBS61	Effects_of_precipitation_on_soil_organic_carbon_fractions_in_three_subtropical_forests_in_southern_China	https://doi.org/10.1093/jpe/rtv027	Research_article	Junhua_Yan	2	9	Journal_of_Plant_Ecology	9	2016	male	Chinese_Academy_of_Sciences	China	Asia	1.833	sb	0	-5		sb
MBS95	Opposing_intraspecific_vs._interspecific_diversity_effects_on_herbivory_and_growth_in_subtropical_experimental_tree_assemblages	https://doi.org/10.1093/jpe/rtw098	Research_article	Christoph_Z_Hahn	1	9	Journal_of_Plant_Ecology	10	2017	male	Helmholtz_Centre_for_Environmental_Research	Germany	Europe	1.833	sb	1	-4		sb
MBS95	Opposing_intraspecific_vs._interspecific_diversity_effects_on_herbivory_and_growth_in_subtropical_experimental_tree_assemblages	https://doi.org/10.1093/jpe/rtw098	Research_article	Walter_Durka	2	9	Journal_of_Plant_Ecology	10	2017	male	Helmholtz_Centre_for_Environmental_Research	Germany	Europe	1.833	sb	1	-4		sb
BSR	Environmentally Mediated Social Dilemmas	https://www.cell.com/trends/ecology-evolution/fulltext/S0169-5347(18)30249-0#%20	Review	Michael Hochberg	2	9	Trends_in_Ecology_and_Evo	34	2019	male	Institut des Sciences de l’Evolution, CNRS Unité Mixte de Recherche 5554, University of Montpellier, Montpellier, France	France			sb	1			sb
BSR	Environmentally Mediated Social Dilemmas	https://www.cell.com/trends/ecology-evolution/fulltext/S0169-5347(18)30249-0#%20	Review	Sylvie estrela	1	9	Trends_in_Ecology_and_Evo	34	2019	female	Microbial Sciences Institute, Yale University, West Haven, CT, USA	USA			sb	1			sb
MBS274	Molecular_phylogeny_and_host‐plant_use_(Lamiaceae)_of_the_Thymogethes_pollen_beetles_(Coleoptera)	https://doi.org/10.1111/zsc.12384	Original_article	Simone_Sabatelli	1	9	Zoologica_Scripta	49	2020	female	"La Sapienza"_University_of_Rome	Italy	Europe	2.603	sb	4	-1		sb
MBS274	Molecular_phylogeny_and_host‐plant_use_(Lamiaceae)_of_the_Thymogethes_pollen_beetles_(Coleoptera)	https://doi.org/10.1111/zsc.12384	Original_article	Paolo_Audisio	2	9	Zoologica_Scripta	49	2020	male	"La Sapienza"_University_of_Rome	Italy	Europe	2.603	sb	4	-1		sb
CCS366	Natural_variation_in_learning_and_memory_dynamics_studied_by_artificial_selection_on_learning_rate_in_parasitic_wasps	https://doi.org/10.1016/j.anbehav.2010.11.002	Research_article	Hans_M_Smid	2	8	Animal_Behaviour	81	2011	male	Wageningen University	The_Netherlands	Europe	2.689	db	0	0	pos	db
CCS366	Natural_variation_in_learning_and_memory_dynamics_studied_by_artificial_selection_on_learning_rate_in_parasitic_wasps	https://doi.org/10.1016/j.anbehav.2010.11.002	Research_article	Michaël_van_den_Berg	1	8	Animal_Behaviour	81	2011	male	Wageningen University	The_Netherlands	Europe	2.689	db	0	0	pos	db
BSR546	Estimating_density_of_a_rare_and_cryptic_high-mountain_Galliform_species,_the_Buff-throated_Partridge_Tetraophasis_szechenyii	http://dx.doi.org/10.5751/ACE-00853-110110	Short_communication	Yu_Xu	1	8	Avian_Conservation_and_Ecology	11	2016	male	Pingdingshan_University	China	Asia	2.541	db	0	0		db
BSR586	Hummingbirds_in_high_alpine_habitats_of_the_tropical_Mexican_mountains:_new_elevational_records_and_ecological_considerations	http://dx.doi.org/10.5751/ACE-01202-130114	Short_communication	Libertad_Arredondo-Amezcua	1	8	Avian_Conservation_and_Ecology	13	2018	female	Instituto_de_Ecología,_A._C.	Mexico	North_America	2.541	db	2	2		db
BSR586	Hummingbirds_in_high_alpine_habitats_of_the_tropical_Mexican_mountains:_new_elevational_records_and_ecological_considerations	http://dx.doi.org/10.5751/ACE-01202-130114	Short_communication	Mauricio_Quesada	2	8	Avian_Conservation_and_Ecology	13	2018	male	Universidad_Nacional_Autónoma_de_México	Mexico	North_America	2.541	db	2	2		db
BSR592	Diurnal_habitat_selection_of_migrating_Whooping_Crane_in_the_Great_Plains	http://dx.doi.org/10.5751/ACE-01317-140106	Research_article	Kristine_L._Metzger	2	8	Avian_Conservation_and_Ecology	14	2019	female	U.S._Fish_and_Wildlife_Service	USA	North_America	2.541	db	3	3		db
BSR592	Diurnal_habitat_selection_of_migrating_Whooping_Crane_in_the_Great_Plains	http://dx.doi.org/10.5751/ACE-01317-140106	Research_article	David_M_Baasch	1	8	Avian_Conservation_and_Ecology	14	2019	male	Executive_Director's_Office_for_the_Platte_River_Recovery_Implementation_Program	USA	North_America	2.541	db	3	3		db
LFLL12	Abyssal_fauna_of_the_UK-1_polymetallic_nodule_exploration_claim,_Clarion-Clipperton_Zone,_central_Pacific_Ocean:_Echinodermata	https://doi.org/10.3897/BDJ.4.e7251	Research_article	Thomas_G_Dahlgren	2	8	Biodiversity_Data_Journal	4	2016	male	Norwegian_Research_Centre	Norway	Europe	1,33	sb	0	-5		sb
LFLL12	Abyssal_fauna_of_the_UK-1_polymetallic_nodule_exploration_claim,_Clarion-Clipperton_Zone,_central_Pacific_Ocean:_Echinodermata	https://doi.org/10.3897/BDJ.4.e7251	Research_article	Adrian_G_Glover	1	8	Biodiversity_Data_Journal	4	2016	male	Natural_History_Museum	UK	Europe	1,33	sb	0	-5		sb
LFLL45	New_evidence_shows_that_Pocillopora_‘damicornis-like’_corals_in_Singapore_are_actually_Pocillopora_acuta_(Scleractinia:_Pocilloporidae)	https://doi.org/10.3897/BDJ.5.e11407	Research_article	Rosa_Celia_Poquita-Du	1	8	Biodiversity_Data_Journal	5	2017	female	National_University_of_Singapore	Singapore	Asia	1,33	sb	1	-4		sb
LFLL45	New_evidence_shows_that_Pocillopora_‘damicornis-like’_corals_in_Singapore_are_actually_Pocillopora_acuta_(Scleractinia:_Pocilloporidae)	https://doi.org/10.3897/BDJ.5.e11407	Research_article	Danwei_Huang	2	8	Biodiversity_Data_Journal	5	2017	male	National_University_of_Singapore	Singapore	Asia	1,33	sb	1	-4		sb
LFLL62	A_global_checklist_of_the_Bombycoidea_(Insecta:_Lepidoptera)	https://doi.org/10.3897/BDJ.6.e22236	Article	Ian_Kitching	1	8	Biodiversity_Data_Journal	6	2018	male	Natural_History_Museum	UK	Europe	1,33	sb	2	-3		sb
LFLL62	A_global_checklist_of_the_Bombycoidea_(Insecta:_Lepidoptera)	https://doi.org/10.3897/BDJ.6.e22236	Article	Akito_Y_Kawahara	2	8	Biodiversity_Data_Journal	6	2018	male	University_of_Florida	USA	North_America	1,33	sb	2	-3		sb
CCS663	The_Atlantic_blue_crab_Callinectes_sapidus_Rathbun,_1896_expands_its_non-native_distribution_into_the_Ria_Formosa_lagoon_and_the_Guadiana_estuary_(SW-Iberian_Peninsula,_Europe)	https://doi.org/10.3391/bir.2019.8.1.14	Rapid_Communication	Maria_Alexandra_Teodósio	2	8	Bioinvasions_Records	8	2019	female	Centre of Marine Sciences (CCMAR) University of Algarve, Campus de Gambelas, 8005-139 Faro, Portugal	Portugal	Europe	1,5	db	3	3		db
CCS663	The_Atlantic_blue_crab_Callinectes_sapidus_Rathbun,_1896_expands_its_non-native_distribution_into_the_Ria_Formosa_lagoon_and_the_Guadiana_estuary_(SW-Iberian_Peninsula,_Europe)	https://doi.org/10.3391/bir.2019.8.1.14	Rapid_Communication	Pedro_Morais	1	8	Bioinvasions_Records	8	2019	male	Department of Environmental Science, Policy, and Management, University of California, Berkeley, Mulford Hall, Berkeley,	USA	North_America	1,5	db	3	3		db
MBS150	Tales_from_the_crypt:_genome_mining_from_fungarium_specimens_improves_resolution_of_the_mushroom_tree_of_life	https://doi.org/10.1111/bij.12553	Research_article	Bryn_T_M_Dentinger	1	8	Biological_Journal_Of_The_Linnean_Society	117	2016	male	Royal_Botanic_Gardens	UK	Europe	1,96	sb	0	-5		sb
MBS150	Tales_from_the_crypt:_genome_mining_from_fungarium_specimens_improves_resolution_of_the_mushroom_tree_of_life	https://doi.org/10.1111/bij.12553	Research_article	Mary_Catherine_Aime	2	8	Biological_Journal_Of_The_Linnean_Society	117	2016	female	Purdue_University	USA	North_America	1,96	sb	0	-5		sb
MBS221	Dwarf_geckos_and_giant_rivers:_the_role_of_the_São_Francisco_River_in_the_evolution_of_Lygodactylus_klugei_(Squamata:_Gekkonidae)_in_the_semi-arid_Caatinga_of_north-eastern_Brazil	https://doi.org/10.1093/biolinnean/blz170	Original_article	Flávia_M_Lanna	1	8	Biological_Journal_Of_The_Linnean_Society	129	2020	female	Universidade_Federal_do_Rio_Grande_do_Norte	Brazil	South_America	1,96	sb	4	-1		sb
MBS221	Dwarf_geckos_and_giant_rivers:_the_role_of_the_São_Francisco_River_in_the_evolution_of_Lygodactylus_klugei_(Squamata:_Gekkonidae)_in_the_semi-arid_Caatinga_of_north-eastern_Brazil	https://doi.org/10.1093/biolinnean/blz170	Original_article	Adrian_A_Garda	2	8	Biological_Journal_Of_The_Linnean_Society	129	2020	male	Universidade_Federal_do_Rio_Grande_do_Norte	Brazil	South_America	1,96	sb	4	-1		sb
MBS228	Sexual_dimorphism_in_the_biomechanical_and_toxicological_performance_in_prey_incapacitation_of_two_morphologically_distinct_scorpion_species_(Chactas_sp._and_Centruroides_sp.)_	https://doi.org/10.1093/biolinnean/blz146	Original_article	Arie_Van_Der_Meijden	2	8	Biological_Journal_Of_The_Linnean_Society	129	2020	male	Universidad_del_Tolima	Colombia	South_America	1,96	sb	4	-1		sb
MBS228	Sexual_dimorphism_in_the_biomechanical_and_toxicological_performance_in_prey_incapacitation_of_two_morphologically_distinct_scorpion_species_(Chactas_sp._and_Centruroides_sp.)_	https://doi.org/10.1093/biolinnean/blz146	Original_article	Julio_César_González-Gómez	1	8	Biological_Journal_Of_The_Linnean_Society	129	2020	male	Universidad_del_Tolima	Colombia	South_America	1,96	sb	4	-1		sb
LMDV254	Reframing_the_concept_of_alternative_livelihoods	https://doi.org/10.1111/cobi.12607	conservation_Practice_and_Policy	E_J_Milner-Gulland	2	8	Conservation_Biology	30	2016	female	Imperial College London	England	Europe	5.405	db	0	0	pos	db
LMDV254	Reframing_the_concept_of_alternative_livelihoods	https://doi.org/10.1111/cobi.12607	conservation_Practice_and_Policy	Juliet_Wright	1	8	Conservation_Biology	30	2016	female	Imperial College London	England	Europe	5.405	db	0	0	pos	db
LMDV295	Using_historical_ecology_to_reassess_the_conservation_status_of_coniferous_forests_in_Central_Europe	https://doi.org/10.1111/cobi.12763	contributed_papers	Peter_Szaba	1	8	Conservation_Biology	31	2017	male	Czech Academy of Sciences	Czech Republic	Europe	5.405	db	1	1	pos	db
LMDV295	Using_historical_ecology_to_reassess_the_conservation_status_of_coniferous_forests_in_Central_Europe	https://doi.org/10.1111/cobi.12763	contributed_papers	Radim_Hodl	2	8	Conservation_Biology	31	2017	male	Czech Academy of Sciences	Czech Republic	Europe	5.405	db	1	1	pos	db
LMDV297	Predictors_of_specialist_avifaunal_decline_in_coastal_marshes	https://doi.org/10.1111/cobi.12797	contributed_papers	Maureen_Correll	1	8	Conservation_Biology	31	2017	female	University of Maine	USA	North_America	5.405	db	1	1	pos	db
LMDV297	Predictors_of_specialist_avifaunal_decline_in_coastal_marshes	https://doi.org/10.1111/cobi.12797	contributed_papers	Brian_Olsen	2	8	Conservation_Biology	31	2017	male	University of Maine	USA	North_America	5.405	db	1	1	pos	db
LMDV320	Determining_the_drivers_of_population_structure_in_a_highly_urbanized_landscape_to_inform_conservation_planning	https://doi.org/10.1111/cobi.12969	contributed_papers	Henri_Thomassen	1	8	Conservation_Biology	32	2018	male	University of Tübingen	Germany	Europe	5.405	db	2	2	pos	db
LMDV320	Determining_the_drivers_of_population_structure_in_a_highly_urbanized_landscape_to_inform_conservation_planning	https://doi.org/10.1111/cobi.12969	contributed_papers	Thomas_Smith	2	8	Conservation_Biology	32	2018	male	University_of_California_Los_Angeles	USA	North_America	5.405	db	2	2	pos	db
BSR	Assessing effects of non-native crayfish on mosquito survival	https://conbio.onlinelibrary.wiley.com/doi/10.1111/cobi.13198	Contributed papers	Gary B	1	8	Conservation_Biology	33	2019	male		USA			db	3	3	pos	db
BSR	Assessing effects of non-native crayfish on mosquito survival	https://conbio.onlinelibrary.wiley.com/doi/10.1111/cobi.13198	Contributed papers	Lee K	2	8	Conservation_Biology	33	2019	male		USA			db	3	3	pos	db
LFLL134	Did_Ranchers_and_Slaughterhouses_Respond_to_Zero‐Deforestation_Agreements_in_the_Brazilian_Amazon?	https://doi.org/10.1111/conl.12175	Letter	Holly_K_Gibbs	1	8	Conservation_Letters	9	2016	female	University_of_Wisconsin	USA	North_America	6.766	sb	0	-5		sb
LFLL134	Did_Ranchers_and_Slaughterhouses_Respond_to_Zero‐Deforestation_Agreements_in_the_Brazilian_Amazon?	https://doi.org/10.1111/conl.12175	Letter	Nathalie_F_Walker	2	8	Conservation_Letters	9	2016	female	National_Wildlife_Federation	USA	North_America	6.766	sb	0	-5		sb
LFLL167	Integrating_Social_and_Ecological_Knowledge_for_Targeting_Voluntary_Biodiversity_Conservation	https://doi.org/10.1111/conl.12340	Letter	Anni_Arponen	2	8	Conservation_Letters	11	2018	female	University_of_Helsinki	Finland	Europe	6.766	sb	2	-3		sb
LFLL167	Integrating_Social_and_Ecological_Knowledge_for_Targeting_Voluntary_Biodiversity_Conservation	https://doi.org/10.1111/conl.12340	Letter	Riikka_Paloniemi	1	8	Conservation_Letters	11	2018	female	Finnish_Environment_Institute	Finland	Europe	6.766	sb	2	-3		sb
LMDV365	Commercial_relationships_between_intermediaries_and_harvesters_of_the_mangrove_crab_Ucides_cordatus_(Linnaeus,_1763)_in_the_Mamanguape_River_estuary,_Brazil,_and_their_socio-ecological_implications,	https://doi.org/10.1016/j.ecolecon.2016.08.017.	surveys	Douglas_MacÃªdo_Nascimento	1	8	Ecological_Economics	131	2017	male	Universidade Federal Rural de Pernambuco	Brazil	South_America	4.482	sb	1	-4		sb
LMDV365	Commercial_relationships_between_intermediaries_and_harvesters_of_the_mangrove_crab_Ucides_cordatus_(Linnaeus,_1763)_in_the_Mamanguape_River_estuary,_Brazil,_and_their_socio-ecological_implications,	https://doi.org/10.1016/j.ecolecon.2016.08.017.	surveys	José_Silva_Mourão	2	8	Ecological_Economics	131	2017	male	Universidade Estadual da Paraíba	Brazil	South_America	4.482	sb	1	-4		sb
LMDV441	Ecosystem_Services_as_Boundary_Objects_for_Transdisciplinary_Collaboration	https://doi.org/10.1016/j.ecolecon.2017.07.016	Research_article	Cara_Steger	1	8	Ecological_Economics	143	2018	female	Colorado State University	USA	North_America	4.482	sb	2	-3		sb
LMDV441	Ecosystem_Services_as_Boundary_Objects_for_Transdisciplinary_Collaboration	https://doi.org/10.1016/j.ecolecon.2017.07.016	Research_article	Carena_Riper	2	8	Ecological_Economics	143	2018	female	University of Illinois at Urbana-Champaign	USA	North_America	4.482	sb	2	-3		sb
BSR40	Graduate_students_navigating_social-ecological_research:_insights_from_the_Long-Term_Ecological_Research_Network	http://dx.doi.org/10.5751/ES-08111-210107	Insight	Sydne_Record	1	8	Ecology_and_Society	21	2016	female	Bryn_Mawr_College	USA	North_America	3,89	db	0	0		db
BSR40	Graduate_students_navigating_social-ecological_research:_insights_from_the_Long-Term_Ecological_Research_Network	http://dx.doi.org/10.5751/ES-08111-210107	Insight	Ben_Beardmore	2	8	Ecology_and_Society	21	2016	male	Center_for_Limnology,_University_of_Wisconsin–Madison;_Wisconsin_Department_of_Natural_Resources	USA	North_America	3,89	db	0	0		db
BSR82	A_microeconomic_perspective_on_the_role_of_efficiency_and_equity_criteria_in_designing_natural_resource_policy	http://dx.doi.org/10.5751/ES-09133-220150	Research_article	Sarah_Mackay	2	8	Ecology_and_Society	22	2017	female	Waikato_Regional_Council	New_Zealand	Oceania	3,89	db	1	1		db
BSR82	A_microeconomic_perspective_on_the_role_of_efficiency_and_equity_criteria_in_designing_natural_resource_policy	http://dx.doi.org/10.5751/ES-09133-220150	Research_article	Geoff_Kaine	1	8	Ecology_and_Society	22	2017	male	Geoff_Kaine_Research	New_Zealand	Oceania	3,89	db	1	1		db
BSR55	Identifying_opportunities_to_improve_governance_of_aquatic_agricultural_systems_through_participatory_action_research	http://dx.doi.org/10.5751/ES-08929-220109	Research_article	Everisto_Mapedza	2	8	Ecology_and_Society	22	2017	male	International_Water_Management_Institute_Pretoria	South_Africa	Africa	3,89	db	1	1		db
BSR55	Identifying_opportunities_to_improve_governance_of_aquatic_agricultural_systems_through_participatory_action_research	http://dx.doi.org/10.5751/ES-08929-220109	Research_article	Jane_Marina_Apgar	1	8	Ecology_and_Society	22	2017	female	Institute_of_Development_Studies_Brighton	UK	Europe	3,89	db	1	1		db
BSR78	The_pleasure_of_pursuit:_recreational_hunters_in_rural_Southwest_China_exhibit_low_exit_rates_in_response_to_declining_catch	http://dx.doi.org/10.5751/ES-09072-220143	Research_article	Charlotte_H_Chang	1	8	Ecology_and_Society	22	2017	female	Princeton_University	USA	North_America	3,89	db	1	1		db
BSR78	The_pleasure_of_pursuit:_recreational_hunters_in_rural_Southwest_China_exhibit_low_exit_rates_in_response_to_declining_catch	http://dx.doi.org/10.5751/ES-09072-220143	Research_article	David_S_Wilcove	2	8	Ecology_and_Society	22	2017	male	Princeton_University	USA	North_America	3,89	db	1	1		db
BSR131	Quantifying_uncertainty_and_trade-offs_in_resilience_assessments	http://dx.doi.org/10.5751/ES-09920-230103	Insight	Craig_R._Allen	1	8	Ecology_and_Society	23	2018	male	U.S._Geological_Survey	USA	North_America	3,89	db	2	2		db
BSR131	Quantifying_uncertainty_and_trade-offs_in_resilience_assessments	http://dx.doi.org/10.5751/ES-09920-230103	Insight	Lance_Gunderson	2	8	Ecology_and_Society	23	2018	male	Emory_University	USA	North_America	3,89	db	2	2		db
BSR170	Creating_space,_aligning_motivations,_and_building_trust:_a_practical_framework_for_stakeholder_engagement_based_on_experience_in_12_ecosystem_services_case_studies	http://dx.doi.org/10.5751/ES-10061-240111	Insight	Heather_A._Schoonover	1	8	Ecology_and_Society	24	2019	female	Lund_University_Centre_for_Sustainability_Studies	Sweden	Europe	3,89	db	3	3		db
BSR170	Creating_space,_aligning_motivations,_and_building_trust:_a_practical_framework_for_stakeholder_engagement_based_on_experience_in_12_ecosystem_services_case_studies	http://dx.doi.org/10.5751/ES-10061-240111	Insight	Kimberly_A._Nicholas	2	8	Ecology_and_Society	24	2019	female	Lund_University_Centre_for_Sustainability_Studies	Sweden	Europe	3,89	db	3	3		db
BSR199	Land_use_planning_in_the_Amazon_basin:_challenges_from_resilience_thinking	http://dx.doi.org/10.5751/ES-11352-250108	Insight	Rocio_Juliana_Acuña-Posada	2	8	Ecology_and_Society	25	2020	female	Conservation_International_Foundation_Colombia	Colombia	South_America	3,89	db	4	4		db
BSR199	Land_use_planning_in_the_Amazon_basin:_challenges_from_resilience_thinking	http://dx.doi.org/10.5751/ES-11352-250108	Insight	Cesar_A_Ruiz_Agudelo	1	8	Ecology_and_Society	25	2020	male	Universidad_Jorge_Tadeo_Lozano	Colombia	South_America	3,89	db	4	4		db
BSR197	Coerced_regimes:_management_challenges_in_the_Anthropocene	http://dx.doi.org/10.5751/ES-11286-250104	Insight	David_G._Angeler	1	8	Ecology_and_Society	25	2020	male	Swedish_University_of_Agricultural_Sciences	Sweden	Europe	3,89	db	4	4		db
BSR197	Coerced_regimes:_management_challenges_in_the_Anthropocene	http://dx.doi.org/10.5751/ES-11286-250104	Insight	Craig_R._Allen	2	8	Ecology_and_Society	25	2020	male	University_of_Nebraska-Lincoln	USA	North_America	3,89	db	4	4		db
LMDV518	Effects_of_thiamethoxam_and_lambda‐cyhalothrin_on_spermatogenesis_of_Euschistus_heros_(Heteroptera:_Pentatomidae)	https://doi.org/10.1111/ens.12257	Original_article	Rachel_Colauto_Milanezi_Aguiar	1	8	Entomological_Science	20	2017	female	Universidade Estadual de Londrina	Brazil	South_America	1.074	sb	1	-4		sb
LMDV518	Effects_of_thiamethoxam_and_lambda‐cyhalothrin_on_spermatogenesis_of_Euschistus_heros_(Heteroptera:_Pentatomidae)	https://doi.org/10.1111/ens.12257	Original_article	Renata_Da_Rosa	2	8	Entomological_Science	20	2017	female	Universidade Estadual de Londrina	Brazil	South_America	1.074	sb	1	-4		sb
LMDV510	Transcriptome_sequencing_reveals_abundant_olfactory_genes_in_the_antennae_of_the_rice_leaffolder,_Cnaphalocrocis_medinalis_(Lepidoptera:_Pyralidae)	https://doi.org/10.1111/ens.12253	Original_article	Su_Liu	1	8	Entomological_Science	20	2017	female	Agricultural University	China	Asia	1.074	sb	1	-4		sb
LFLL266	Sex_determination_mode_does_not_affect_body_or_genital_development_of_the_central_bearded_dragon_(Pogona_vitticeps)	https://doi.org/10.1186/s13227-017-0087-5	Research_article	Sarah_L_Whiteley	1	8	EvoDevo	8	2017	female	University_of_Queensland	Australia	Oceania	2.146	sb	1	-4		sb
LFLL266	Sex_determination_mode_does_not_affect_body_or_genital_development_of_the_central_bearded_dragon_(Pogona_vitticeps)	https://doi.org/10.1186/s13227-017-0087-5	Research_article	Vera_Weisbecker	2	8	EvoDevo	8	2017	female	University_of_Queensland	Australia	Oceania	2.146	sb	1	-4		sb
LFLL257	Differences_in_the_genetic_control_of_early_egg_development_and_reproduction_between_C._elegans_and_its_parthenogenetic_relative_D._coronatus	https://doi.org/10.1186/s13227-017-0081-y	Research_article	Christopher_Kraus	1	8	EvoDevo	8	2017	male	Universität_zu_Köln	Germany	Europe	2.146	sb	1	-4		sb
LFLL257	Differences_in_the_genetic_control_of_early_egg_development_and_reproduction_between_C._elegans_and_its_parthenogenetic_relative_D._coronatus	https://doi.org/10.1186/s13227-017-0081-y	Research_article	Einhard_Schierenberg	2	8	EvoDevo	8	2017	male	Universität_zu_Köln	Germany	Europe	2.146	sb	1	-4		sb
LFLL333	Differential_cellular_proliferation_underlies_heterochronic_generation_of_cranial_diversity_in_phyllostomid_bats	https://doi.org/10.1186/s13227-020-00156-9	Research_article	Arhat_Abzhanov	2	8	EvoDevo	11	2020	male	Imperial_College_London	UK	Europe	2.146	sb	4	-1		sb
LFLL333	Differential_cellular_proliferation_underlies_heterochronic_generation_of_cranial_diversity_in_phyllostomid_bats	https://doi.org/10.1186/s13227-020-00156-9	Research_article	Jasmin_Camacho	1	8	EvoDevo	11	2020	female	Harvard_University	USA	North_America	2.146	sb	4	-1		sb
CCS462	Effects_of_management_on_aquatic_tree‐hole_communities_in_temperate_forests_are_mediated_by_detritus_amount_and_water_chemistry	https://doi.org/10.1111/1365-2656.12437	Research_article	Jana_S_Petermann	2	8	Journal_of_Animal_Ecology	85	2016	female	Department of Ecology and Evolution, University of Salzburg, Hellbrunnerstrasse 34, 5020 Salzburg, Austria	Austria	Europe	4.554	sb	0	-5		sb
CCS462	Effects_of_management_on_aquatic_tree‐hole_communities_in_temperate_forests_are_mediated_by_detritus_amount_and_water_chemistry	https://doi.org/10.1111/1365-2656.12437	Research_article	Martin_M_Gossner	1	8	Journal_of_Animal_Ecology	85	2016	male	Universität München, Hans‐Carl‐von‐Carlowitz‐Platz 2, 85354 Freising‐Weihenstephan, Germany	Germany	Europe	4.554	sb	0	-5		sb
CCS446	Predicting_the_continuum_between_corridors_and_barriers_to_animal_movements_using_Step_Selection_Functions_and_Randomized_Shortest_Paths	https://doi.org/10.1111/1365-2656.12386	Research_article	Luigi_Boitani	2	8	Journal_of_Animal_Ecology	85	2016	female	Department of Animal and Human Biology, Sapienza University, Viale dell'Università 32, Rome, 00185 Italy	Italy	Europe	4.554	sb	0	-5		sb
CCS446	Predicting_the_continuum_between_corridors_and_barriers_to_animal_movements_using_Step_Selection_Functions_and_Randomized_Shortest_Paths	https://doi.org/10.1111/1365-2656.12386	Research_article	Manuela_Panzacchi	1	8	Journal_of_Animal_Ecology	85	2016	female	Norwegian Institute for Nature Research (NINA), Trondheim, 7485 Norway	Norway	Europe	4.554	sb	0	-5		sb
CCS503	Invasive_earthworms_erode_soil_biodiversity:_A_meta‐analysis	https://doi.org/10.1111/1365-2656.12746	Research_article	Olga_Ferlian	1	8	Journal_of_Animal_Ecology	87	2018	female	German Centre for Integrative Biodiversity Research (iDiv) Halle‐Jena‐Leipzig, Leipzig, Germany	Germany	Europe	4.554	sb	2	-3		sb
CCS503	Invasive_earthworms_erode_soil_biodiversity:_A_meta‐analysis	https://doi.org/10.1111/1365-2656.12746	Research_article	Madhav_P_Thakur	2	8	Journal_of_Animal_Ecology	87	2018	male	German Centre for Integrative Biodiversity Research (iDiv) Halle‐Jena‐Leipzig, Leipzig, Germany	Germany	Europe	4.554	sb	2	-3		sb
CCS505	Spatio‐temporal_variation_in_lifelong_telomere_dynamics_in_a_long‐term_ecological_study	https://doi.org/10.1111/1365-2656.12741	Research_article	David_S_Richardson	2	8	Journal_of_Animal_Ecology	87	2018	male	School of Biological Sciences, University of East Anglia, Norwich Research Park, UK	UK	Europe	4.554	sb	2	-3		sb
CCS505	Spatio‐temporal_variation_in_lifelong_telomere_dynamics_in_a_long‐term_ecological_study	https://doi.org/10.1111/1365-2656.12741	Research_article	Lewis_G_Spurgin	1	8	Journal_of_Animal_Ecology	87	2018	male	School of Biological Sciences, University of East Anglia, Norwich Research Park, UK	UK	Europe	4.554	sb	2	-3		sb
CCS541	High_inter‐_and_intraspecific_niche_overlap_among_three_sympatrically_breeding,_closely_related_seabird_species:_Generalist_foraging_as_an_adaptation_to_a_highly_variable_environment?	https://doi.org/10.1111/1365-2656.13078	Research_article	Louise_Emmerson	2	8	Journal_of_Animal_Ecology	89	2020	female	Australian Antarctic Division, Department of the Environment and Energy, Kingston, Tas., Australia	Australia	Oceania	4.554	sb	4	-1		sb
CCS541	High_inter‐_and_intraspecific_niche_overlap_among_three_sympatrically_breeding,_closely_related_seabird_species:_Generalist_foraging_as_an_adaptation_to_a_highly_variable_environment?	https://doi.org/10.1111/1365-2656.13078	Research_article	Nina_Dehnhard	1	8	Journal_of_Animal_Ecology	89	2020	female	University of Antwerp, Antwerp (Wilrijk), Belgium	Belgium	Europe	4.554	sb	4	-1		sb
LFLL357	Transferability_of_predictive_models_of_coral_reef_fish_species_richness	https://doi.org/10.1111/1365-2664.12578	Research_article	Ana_MM_Sequeira	1	8	Journal_of_Applied_Ecology	53	2016	female	The_University_of_Western_Australia	Australia	Oceania	5,84	sb	0	-5		sb
LFLL357	Transferability_of_predictive_models_of_coral_reef_fish_species_richness	https://doi.org/10.1111/1365-2664.12578	Research_article	M_Julian_Caley	2	8	Journal_of_Applied_Ecology	53	2016	male	Australian_Institute_of_Marine_Science	Australia	Oceania	5,84	sb	0	-5		sb
LFLL383	The_impacts_of_climate_change_and_disturbance_on_spatio‐temporal_trajectories_of_biodiversity_in_a_temperate_forest_landscape	https://doi.org/10.1111/1365-2664.12644	Review	Dominik_Thom	1	8	Journal_of_Applied_Ecology	54	2017	male	University_of_Natural_Resources_and_Life_Sciences	Austria	Europe	5,84	sb	1	-4		sb
LFLL383	The_impacts_of_climate_change_and_disturbance_on_spatio‐temporal_trajectories_of_biodiversity_in_a_temperate_forest_landscape	https://doi.org/10.1111/1365-2664.12644	Review	Rupert_Seidl	2	8	Journal_of_Applied_Ecology	54	2017	male	University_of_Natural_Resources_and_Life_Sciences	Austria	Europe	5,84	sb	1	-4		sb
LFLL411	Extinction_risk_of_North_American_seed_plants_elevated_by_climate_and_land‐use_change	https://doi.org/10.1111/1365-2664.12701	Research_article	Jian_Zhang	1	8	Journal_of_Applied_Ecology	54	2017	male	East_China_Normal_University	China	Asia	5,84	sb	1	-4		sb
LFLL384	Extreme_climate_events_counteract_the_effects_of_climate_and_land‐use_changes_in_Alpine_tree_lines	https://doi.org/10.1111/1365-2664.12742	Review	Ceres_Barros	1	8	Journal_of_Applied_Ecology	54	2017	female	Université_Grenoble_Alpes	France	Europe	5,84	sb	1	-4		sb
LFLL411	Extinction_risk_of_North_American_seed_plants_elevated_by_climate_and_land‐use_change	https://doi.org/10.1111/1365-2664.12701	Research_article	Wilfried_Thuiller	2	8	Journal_of_Applied_Ecology	54	2017	male	Université_Grenoble_Alpes	France	Europe	5,84	sb	1	-4		sb
LFLL384	Extreme_climate_events_counteract_the_effects_of_climate_and_land‐use_changes_in_Alpine_tree_lines	https://doi.org/10.1111/1365-2664.12742	Review	Wilfried_Thuiller	2	8	Journal_of_Applied_Ecology	54	2017	male	Université_Grenoble_Alpes	France	Europe	5,84	sb	1	-4		sb
LFLL408	Do_cities_represent_sources,_sinks_or_isolated_islands_for_urban_wild_boar_population_structure?	https://doi.org/10.1111/1365-2664.12756	Research_article	Milena_Stillfried	1	8	Journal_of_Applied_Ecology	54	2017	female	Leibniz_Institute_of_Zoo_and_Wildlife_Research	Germany	Europe	5,84	sb	1	-4		sb
LFLL392	Genetic_differentiation_and_regional_adaptation_among_seed_origins_used_for_grassland_restoration:_lessons_from_a_multispecies_transplant_experiment	https://doi.org/10.1111/1365-2664.12645	Review	Anna_Bucharova	1	8	Journal_of_Applied_Ecology	54	2017	female	University_of_Tübingen	Germany	Europe	5,84	sb	1	-4		sb
LFLL391	Genetic_differentiation_within_multiple_common_grassland_plants_supports_seed_transfer_zones_for_ecological_restoration	https://doi.org/10.1111/1365-2664.12636	Review	Johannes_Kollmann	2	8	Journal_of_Applied_Ecology	54	2017	male	Technical_University_Munich	Germany	Europe	5,84	sb	1	-4		sb
LFLL391	Genetic_differentiation_within_multiple_common_grassland_plants_supports_seed_transfer_zones_for_ecological_restoration	https://doi.org/10.1111/1365-2664.12636	Review	Walter_Durka	1	8	Journal_of_Applied_Ecology	54	2017	male	Helmholtz_Centre_for_Environmental_Research	Germany	Europe	5,84	sb	1	-4		sb
LFLL392	Genetic_differentiation_and_regional_adaptation_among_seed_origins_used_for_grassland_restoration:_lessons_from_a_multispecies_transplant_experiment	https://doi.org/10.1111/1365-2664.12645	Review	Oliver_Bossdorf	2	8	Journal_of_Applied_Ecology	54	2017	male	University_of_Tübingen	Germany	Europe	5,84	sb	1	-4		sb
LFLL408	Do_cities_represent_sources,_sinks_or_isolated_islands_for_urban_wild_boar_population_structure?	https://doi.org/10.1111/1365-2664.12756	Research_article	Alain_C_Frantz	2	8	Journal_of_Applied_Ecology	54	2017	male	Museum_of_Natural_History	Luxembourg	Europe	5,84	sb	1	-4		sb
LFLL481	Plant_functional_diversity_and_nutrient_availability_can_improve_restoration_of_floating_fens_via_facilitation,_complementarity_and_selection_effects	https://doi.org/10.1111/1365-2664.13256	Research_article	Merel_B_Soons	2	8	Journal_of_Applied_Ecology	56	2019	female	Utrecht_University	The_Netherlands	Europe	5,84	sb	3	-2		sb
LFLL481	Plant_functional_diversity_and_nutrient_availability_can_improve_restoration_of_floating_fens_via_facilitation,_complementarity_and_selection_effects	https://doi.org/10.1111/1365-2664.13256	Research_article	Jeroen_P_van_Zuidam	1	8	Journal_of_Applied_Ecology	56	2019	male	Utrecht_University	The_Netherlands	Europe	5,84	sb	3	-2		sb
LFLL488	Exotic_eucalypts:_From_demonized_trees_to_allies_of_tropical_forest_restoration?	https://doi.org/10.1111/1365-2664.13513	Research_article	Pedro_HS_Brancalion	1	8	Journal_of_Applied_Ecology	57	2020	male	Universidade_de_São_Paulo	Brazil	South_America	5,84	sb	4	-1		sb
LFLL499	Do_diverse_landscapes_provide_for_effective_natural_pest_control_in_subtropical_rice?	https://doi.org/10.1111/1365-2664.13520	Research_article	Wopke_van_der_Werf	2	8	Journal_of_Applied_Ecology	57	2020	male	Wageningen_University_&_Research	The_Netherlands	Europe	5,84	sb	4	-1		sb
LFLL499	Do_diverse_landscapes_provide_for_effective_natural_pest_control_in_subtropical_rice?	https://doi.org/10.1111/1365-2664.13520	Research_article	Yi_Zou	1	8	Journal_of_Applied_Ecology	57	2020	male	Wageningen_University_&_Research	The_Netherlands	Europe	5,84	sb	4	-1		sb
LFLL488	Exotic_eucalypts:_From_demonized_trees_to_allies_of_tropical_forest_restoration?	https://doi.org/10.1111/1365-2664.13513	Research_article	Karen_D_Holl	2	8	Journal_of_Applied_Ecology	57	2020	female	University_of_California	USA	North_America	5,84	sb	4	-1		sb
LFLL496	Seeking_compromise_across_competing_goals_in_conservation_translocations:_The_case_of_the_‘extinct’_Floreana_Island_Galapagos_giant_tortoise	https://doi.org/10.1111/1365-2664.13516	Research_article	Elizabeth_A_Hunter	1	8	Journal_of_Applied_Ecology	57	2020	female	Georgia_Southern_University	USA	North_America	5,84	sb	4	-1		sb
LFLL496	Seeking_compromise_across_competing_goals_in_conservation_translocations:_The_case_of_the_‘extinct’_Floreana_Island_Galapagos_giant_tortoise	https://doi.org/10.1111/1365-2664.13516	Research_article	Kevin_T_Shoemaker	2	8	Journal_of_Applied_Ecology	57	2020	male	University_of_Nevada	USA	North_America	5,84	sb	4	-1		sb
MBS314	Evolution_in_the_South_American_‘Lost_World’:_insights_from_multilocus_phylogeography_of_stefanias_(Anura,_Hemiphractidae,_Stefania)	https://doi.org/10.1111/jbi.12860	Original_article	Franky_Bossuyt	2	8	Journal_of_Biogeography	44	2017	male	Vrije_Universiteit_Brussel	Belgium	Europe	3.723	sb	1	-4		sb
MBS314	Evolution_in_the_South_American_‘Lost_World’:_insights_from_multilocus_phylogeography_of_stefanias_(Anura,_Hemiphractidae,_Stefania)	https://doi.org/10.1111/jbi.12860	Original_article	Philippe_J_R_Kok	1	8	Journal_of_Biogeography	44	2017	male	Vrije_Universiteit_Brussel	Belgium	Europe	3.723	sb	1	-4		sb
MBS304	The_ecological_niche_and_distribution_of_Neanderthals_during_the_Last_Interglacial	https://doi.org/10.1111/jbi.12845	Original_article	Blas_M_Benito	1	8	Journal_of_Biogeography	44	2017	male	Aarhus_University	Denmark	Europe	3.723	sb	1	-4		sb
MBS304	The_ecological_niche_and_distribution_of_Neanderthals_during_the_Last_Interglacial	https://doi.org/10.1111/jbi.12845	Original_article	Brody_S_Sandel	2	8	Journal_of_Biogeography	44	2017	male	Aarhus_University	Denmark	Europe	3.723	sb	1	-4		sb
MBS336	African_origin_and_global_distribution_patterns:_Evidence_inferred_from_phylogenetic_and_biogeographical_analyses_of_ectomycorrhizal_fungal_genus_Strobilomyces	https://doi.org/10.1111/jbi.13094	Original_article	Li_H_Han	1	8	Journal_of_Biogeography	45	2018	female	Chinese_Academy_of_Sciences	China	Asia	3.723	sb	2	-3		sb
MBS324	Ice_sheets_and_genetics:_Insights_into_the_phylogeography_of_Scottish_Atlantic_salmon,_Salmo_salar_L.	https://doi.org/10.1111/jbi.13097	Original_article	Eef_Cauwelier	1	8	Journal_of_Biogeography	45	2018	male	Freshwater_Fisheries_Laboratory	UK	Europe	3.723	sb	2	-3		sb
MBS324	Ice_sheets_and_genetics:_Insights_into_the_phylogeography_of_Scottish_Atlantic_salmon,_Salmo_salar_L.	https://doi.org/10.1111/jbi.13097	Original_article	John_Gilbey	2	8	Journal_of_Biogeography	45	2018	male	Freshwater_Fisheries_Laboratory	UK	Europe	3.723	sb	2	-3		sb
MBS355	Drivers_of_species_richness_and_abundance_of_marine_macrophytes_on_shallow_tropical_reefs_of_north‐western_Australia	https://doi.org/10.1111/jbi.13470	Original_article	Ylva_S_Olsen	1	8	Journal_of_Biogeography	46	2019	female	University_of_Western_Australia	Australia	Oceania	3.723	sb	3	-2		sb
MBS355	Drivers_of_species_richness_and_abundance_of_marine_macrophytes_on_shallow_tropical_reefs_of_north‐western_Australia	https://doi.org/10.1111/jbi.13470	Original_article	Gary_A_Kendrick	2	8	Journal_of_Biogeography	46	2019	male	University_of_Western_Australia	Australia	Oceania	3.723	sb	3	-2		sb
MBS365	Productivity_begets_less_phylogenetic_diversity_but_higher_uniqueness_than_expected	https://doi.org/10.1111/jbi.13630	Original_article	Florent_Mazel	2	8	Journal_of_Biogeography	47	2020	male	University_of_British_Columbia	Canada	North_America	3.723	sb	4	-1		sb
MBS365	Productivity_begets_less_phylogenetic_diversity_but_higher_uniqueness_than_expected	https://doi.org/10.1111/jbi.13630	Original_article	Wilfried_Thuiller	1	8	Journal_of_Biogeography	47	2020	male	Université_Grenoble_Alpes	France	Europe	3.723	sb	4	-1		sb
MBS373	Reconstructing_the_geographic_and_climatic_origins_of_long‐distance_bird_migrations	https://doi.org/10.1111/jbi.13700	Original_article	Paul_Dufour	1	8	Journal_of_Biogeography	47	2020	male	Université_Savoie-Mont_Blanc	France	Europe	3.723	sb	4	-1		sb
MBS373	Reconstructing_the_geographic_and_climatic_origins_of_long‐distance_bird_migrations	https://doi.org/10.1111/jbi.13700	Original_article	Sébastien_Lavergne	2	8	Journal_of_Biogeography	47	2020	male	Université_Savoie-Mont_Blanc	France	Europe	3.723	sb	4	-1		sb
LFLL	Strength, diversity and plasticity of postmating reproductive barriers between two hybridizing oak species (Quercus robur L. and Quercus petraea (Matt) Liebl.)	/doi/10.1111/j.1420-9101.2011.02414.x	Research_paper	Pauline Garnier-Géré	2	8	Journal_of_evolutionary_biology	25	2012	female	Université de Bordeaux, UMR 1202 BIOGECO, 69 route d’Arcachon, F-33612 Cestas, France	France	Europe	3	db	-4		pre	sb
LFLL	Strength, diversity and plasticity of postmating reproductive barriers between two hybridizing oak species (Quercus robur L. and Quercus petraea (Matt) Liebl.)	/doi/10.1111/j.1420-9101.2011.02414.x	Research_paper	Pierre Abadie	1	8	Journal_of_evolutionary_biology	25	2012	male	Université de Bordeaux, UMR 1202 BIOGECO, 69 route d’Arcachon, F-33612 Cestas, France	France	Europe	3	db	-4		pre	sb
CCS	Parallel plumage colour evolution and introgressive hybridization in wheatears	/doi/10.1111/jeb.13401	Research Paper	Reto Burri	2	8	Journal_of_evolutionary_biology	32	2019	male	Department of Population Ecology, Institute of Ecology and Evolution, Friedrich Schiller University Jena, Jena, Germany	Germany	Europe	2.541	db	1		pos	db
CCS	On the origin of Robertsonian fusions in nature: evidence of telomere shortening in wild house mice	/doi/10.1111/jeb.12568	Research Paper	Aurora Ruiz-Herrera	2	8	Journal_of_evolutionary_biology	28	2015	female	Genome Integrity and Instability Group, Institut de Biotecnologia i Biomedicina (IBB), Universitat Aut<U+5606>noma de Barcelona, Barcelona, Spain	Spain	Europe	2.541	db	-1		pre	sb
CCS	On the origin of Robertsonian fusions in nature: evidence of telomere shortening in wild house mice	/doi/10.1111/jeb.12568	Research Paper	Rosa Ana Sánchez-Guillén	1	8	Journal_of_evolutionary_biology	28	2015	female	Genome Integrity and Instability Group, Institut de Biotecnologia i Biomedicina (IBB), Universitat Aut<U+5606>noma de Barcelona, Barcelona, Spain	Spain	Europe	2.541	db	-1		pre	sb
LFLL	Local adaptation and matching habitat choice in female barn owls with respect to melanic coloration	/doi/10.1111/j.1420-9101.2011.02407.x	Research_paper	Amélie Dreiss	1	8	Journal_of_evolutionary_biology	25	2012	female	Department of Ecology and Evolution, University of Lausanne, Lausanne, Switzerland	Switzerland	Europe	3	db	-4		pre	sb
LFLL	Local adaptation and matching habitat choice in female barn owls with respect to melanic coloration	/doi/10.1111/j.1420-9101.2011.02407.x	Research_paper	Alexandre Roulin	2	8	Journal_of_evolutionary_biology	25	2012	male	Department of Ecology and Evolution, University of Lausanne, Lausanne, Switzerland	Switzerland	Europe	3	db	-4		pre	sb
CCS	Parallel plumage colour evolution and introgressive hybridization in wheatears	/doi/10.1111/jeb.13401	Research Paper	Manuel Schweizer	1	8	Journal_of_evolutionary_biology	32	2019	male	Natural History Museum Bern, Bern, Switzerland	Switzerland	Europe	2.541	db	1		pos	db
LFLL	Genotype-by-environment interactions for cuticular hydrocarbon expression in Drosophila simulans	/doi/10.1111/jeb.12030	Research_paper	Fiona C. Ingleby	1	8	Journal_of_evolutionary_biology	26	2013	female	Centre for Ecology and Conservation, School of Biosciences, University of Exeter, Tremough, Penryn, UK	UK	Europe	3	db	-3		pre	sb
LFLL	Genotype-by-environment interactions for cuticular hydrocarbon expression in Drosophila simulans	/doi/10.1111/jeb.12030	Research_paper	John Hunt	2	8	Journal_of_evolutionary_biology	26	2013	male	Centre for Ecology and Conservation, School of Biosciences, University of Exeter, Tremough, Penryn, UK	UK	Europe	3	db	-3		pre	sb
CCS	Heritability and social brood effects on personality in juvenile and adult life-history stages in a wild passerine	/doi/10.1111/jeb.13197	Research Paper	Isabel Winney	1	8	Journal_of_evolutionary_biology	31	2018	female	Department of Animal and Plant Sciences, University of Sheffield, Sheffield, UK	UK	Europe	2.541	db	0		pos	db
CCS	Heritability and social brood effects on personality in juvenile and adult life-history stages in a wild passerine	/doi/10.1111/jeb.13197	Research Paper	Terry Burke	2	8	Journal_of_evolutionary_biology	31	2018	male	Department of Animal and Plant Sciences, University of Sheffield	UK	Europe	2.541	db	0		pos	db
MBS47	Resources_utilization_and_trophic_niche_between_silver_carp_and_bighead_carp_in_two_mesotrophic_deep_reservoirs	https://doi.org/10.1080/02705060.2018.1560368	Original_article	Man_Zhang	1	8	Journal_of_Freshwater_Ecology	34	2019	female	Henan_Normal_University	China	Asia	1.239	sb	3	-2		sb
MBS47	Resources_utilization_and_trophic_niche_between_silver_carp_and_bighead_carp_in_two_mesotrophic_deep_reservoirs	https://doi.org/10.1080/02705060.2018.1560368	Original_article	Xuejun_Li	2	8	Journal_of_Freshwater_Ecology	34	2019	male	Henan_Normal_University	China	Asia	1.239	sb	3	-2		sb
MBS52	Effect_of_ground_water_level_on_the_release_of_carbon,_nitrogen_and_phosphorus_during_decomposition_of_Carex._cinerascens_Kükenth_in_the_typical_seasonal_floodplain_in_dry_season	https://doi.org/10.1080/02705060.2019.1584128	Original_article	Quanjun_Zhang	1	8	Journal_of_Freshwater_Ecology	34	2019	male	Chinese_Academy_of_Sciences	China	Asia	1.239	sb	3	-2		sb
MBS54	Spatio-temporal_patterns_and_predictions_of_size-fractionated_chlorophyll_a_in_a_large_subtropical_river,_China	https://doi.org/10.1080/02705060.2019.1708487	Research_article	Chao_Wang	2	8	Journal_of_Freshwater_Ecology	35	2020	male	Chinese_Academy_of_Fishery_Science	China	Asia	1.239	sb	4	-1		sb
MBS54	Spatio-temporal_patterns_and_predictions_of_size-fractionated_chlorophyll_a_in_a_large_subtropical_river,_China	https://doi.org/10.1080/02705060.2019.1708487	Research_article	Jinhui_Sun	1	8	Journal_of_Freshwater_Ecology	35	2020	male	Tianjin_Agricultural_University	China	Asia	1.239	sb	4	-1		sb
MBS78	Diversity_of_root-associated_fungi_of_Vaccinium_mandarinorum_along_a_human_disturbance_gradient_in_subtropical_forests,_China	https://doi.org/10.1093/jpe/rtw022	Research_article	Yanhua_Zhang	1	8	Journal_of_Plant_Ecology	10	2017	male	Shaoxing_University	China	Asia	1.833	sb	1	-4		sb
MBS78	Diversity_of_root-associated_fungi_of_Vaccinium_mandarinorum_along_a_human_disturbance_gradient_in_subtropical_forests,_China	https://doi.org/10.1093/jpe/rtw022	Research_article	Yu_Liang	2	8	Journal_of_Plant_Ecology	10	2017	male	Chinese_Academy_of_Sciences	China	Asia	1.833	sb	1	-4		sb
MBS124	Environmental_and_spatial_contributions_to_seedling_and_adult_tree_assembly_across_tropical,_subtropical_and_subalpine_elevational_gradients	https://doi.org/10.1093/jpe/rtx072	Research_article	Jie_Yang	2	8	Journal_of_Plant_Ecology	12	2019	female	Chinese_Academy_of_Sciences	China	Asia	1.833	sb	3	-2		sb
MBS124	Environmental_and_spatial_contributions_to_seedling_and_adult_tree_assembly_across_tropical,_subtropical_and_subalpine_elevational_gradients	https://doi.org/10.1093/jpe/rtx072	Research_article	Xiaoyang_Song	1	8	Journal_of_Plant_Ecology	12	2019	male	Chinese_Academy_of_Sciences	China	Asia	1.833	sb	3	-2		sb
MBS143	Seasonal_variation_in_native_hydraulic_conductivity_between_two_deciduous_oak_species	https://doi.org/10.1093/jpe/rtz051	Research_article	Dilia_Mota-Gutiérrez	1	8	Journal_of_Plant_Ecology	13	2020	female	Universidad_Michoacana_de_San_Nicolás_de_Hidalgo	Mexico	North_America	1.833	sb	4	-1		sb
MBS143	Seasonal_variation_in_native_hydraulic_conductivity_between_two_deciduous_oak_species	https://doi.org/10.1093/jpe/rtz051	Research_article	Fernando_Pineda-García	2	8	Journal_of_Plant_Ecology	13	2020	male	Universidad_Nacional_Autónoma_de_México	Mexico	North_America	1.833	sb	4	-1		sb
AN136	Species Richness and the Temporal Stability of Biomass Production: A New Analysis of Recent Biodiversity Experiments	https://doi/10.1086/673916	Article	Jasper van Ruijven	2	8	The_American_Naturalist	183	2014	male	Nature Conservation and Plant Ecology group, Wageningen University	The_Netherlands	Europe	2541	db	-1		pre	sb
AN135	Species Richness and the Temporal Stability of Biomass Production: A New Analysis of Recent Biodiversity Experiments	https://doi/10.1086/673915	Article	Kevin Gross	1	8	The_American_Naturalist	183	2014	male	Biomathematics Program, North Carolina State University, Raleigh, North Carolina	USA	North_America	2541	db	-1		pre	sb
BSR	Towards an Evolutionary Theory of Stress Responses		Opinion	Barbara T	1	8	Trends_in_Ecology_and_Evo	36	2021	female		Switzerland			sb	3			sb
BSR	Towards an Evolutionary Theory of Stress Responses		Opinion	Carmen S	2	8	Trends_in_Ecology_and_Evo	36	2021	female		Switzerland			sb	3			sb
MBS251	Multilocus_phylogeny_and_taxonomy_of_East_Asian_voles_Alexandromys_(Rodentia,_Arvicolinae)	https://doi.org/10.1111/zsc.12261	Original_article	Natalia_I_Abramson	2	8	Zoologica_Scripta	47	2018	female	Russian_Academy_of_Science	Russia	Europe	2.603	sb	2	-3		sb
MBS251	Multilocus_phylogeny_and_taxonomy_of_East_Asian_voles_Alexandromys_(Rodentia,_Arvicolinae)	https://doi.org/10.1111/zsc.12261	Original_article	Andrey_A_Lissovsky	1	8	Zoologica_Scripta	47	2018	male	Moscow_State_University	Russia	Europe	2.603	sb	2	-3		sb
MBS267	A_new_surface_gliding_species_of_Chironomidae:_An_independent_invasion_of_marine_environments_and_its_evolutionary_implications	https://doi.org/10.1111/zsc.12331	Original_article	Xin_Qi	1	8	Zoologica_Scripta	48	2019	female	Taizhou_University	China	Asia	2.603	sb	3	-2		sb
MBS267	A_new_surface_gliding_species_of_Chironomidae:_An_independent_invasion_of_marine_environments_and_its_evolutionary_implications	https://doi.org/10.1111/zsc.12331	Original_article	Xin‐Hua_Wang	2	8	Zoologica_Scripta	48	2019	male	Nankai_University	China	Asia	2.603	sb	3	-2		sb
MBS262	Significant_Asia‐Europe_divergence_in_the_middle_spotted_woodpecker_(Aves,_Picidae)	https://doi.org/10.1111/zsc.12320	Original_article	Laura_Kamp	1	8	Zoologica_Scripta	48	2019	female	Naturhistorisches_Museum_der_Burgergemeinde_Bern	Switzerland	Europe	2.603	sb	3	-2		sb
MBS262	Significant_Asia‐Europe_divergence_in_the_middle_spotted_woodpecker_(Aves,_Picidae)	https://doi.org/10.1111/zsc.12320	Original_article	Manuel_Schweizer	2	8	Zoologica_Scripta	48	2019	male	Naturhistorisches_Museum_der_Burgergemeinde_Bern	Switzerland	Europe	2.603	sb	3	-2		sb
MBS272	Multilocus_phylogeny_of_a_cryptic_radiation_of_Afrotropical_long‐fingered_bats_(Chiroptera,_Miniopteridae)	https://doi.org/10.1111/zsc.12388	Original_article	Bruce_D_Patterson	2	8	Zoologica_Scripta	49	2020	male	Field_Museum_of_Natural_History	USA	North_America	2.603	sb	4	-1		sb
MBS272	Multilocus_phylogeny_of_a_cryptic_radiation_of_Afrotropical_long‐fingered_bats_(Chiroptera,_Miniopteridae)	https://doi.org/10.1111/zsc.12388	Original_article	Terrence_C_Demos	1	8	Zoologica_Scripta	49	2020	male	Field_Museum_of_Natural_History	USA	North_America	2.603	sb	4	-1		sb
CCS161	Self-organized_aggregation_in_cockroaches	https://doi.org/10.1016/j.anbehav.2004.02.009	Research_article	Guy_Theraulaz	2	7	Animal_Behaviour	69	2005	male	Centre de Recherches sur la Cognition Animale, CNRS, Université Paul Sabatier, France	France	Europe	2.689	db	-4	-4	pre	sb
CCS161	Self-organized_aggregation_in_cockroaches	https://doi.org/10.1016/j.anbehav.2004.02.009	Research_article	Raphael_Jeanson	1	7	Animal_Behaviour	69	2005	male	Centre de Recherches sur la Cognition Animale, CNRS, Université Paul Sabatier, France	France	Europe	2.689	db	-4	-4	pre	sb
CCS350	Do_dogs_distinguish_rational_from_irrational_acts?	https://doi.org/10.1016/j.anbehav.2010.10.001	Research_article	Juliane_Kaminski	1	7	Animal_Behaviour	81	2011	female	Max Planck Institute for Evolutionary Anthropology, Germany	Germany	Europe	2.689	db	0	0	pos	db
CCS350	Do_dogs_distinguish_rational_from_irrational_acts?	https://doi.org/10.1016/j.anbehav.2010.10.001	Research_article	Michael_Tomasello	2	7	Animal_Behaviour	81	2011	male	Max Planck Institute for Evolutionary Anthropology, Germany	Germany	Europe	2.689	db	0	0	pos	db
CCS440	Sexual_segregation_in_rockhopper_penguins_during_incubation	https://doi.org/10.1016/j.anbehav.2012.11.001	Research_article	Katrin_Ludynia	1	7	Animal_Behaviour	85	2013	female	Max-Planck Institute for Ornithology, Vogelwarte Radolfzell, Germany	Germany	Europe	2.689	db	2	2	pos	db
CCS440	Sexual_segregation_in_rockhopper_penguins_during_incubation	https://doi.org/10.1016/j.anbehav.2012.11.001	Research_article	Petra_Quillfeldt	2	7	Animal_Behaviour	85	2013	female	Max-Planck Institute for Ornithology, Vogelwarte Radolfzell, Germany	Germany	Europe	2.689	db	2	2	pos	db
CCS437	Individual_memory_and_the_emergence_of_cooperation	https://doi.org/10.1016/j.anbehav.2012.10.030	Research_article	João_Moreira	1	7	Animal_Behaviour	85	2013	male	Instituto para a Investigação Interdisciplinar, Universidade de Lisboa, Lisboa, Portugal	Portugal	Europe	2.689	db	2	2	pos	db
CCS437	Individual_memory_and_the_emergence_of_cooperation	https://doi.org/10.1016/j.anbehav.2012.10.030	Research_article	Jorge_M._Pacheco	2	7	Animal_Behaviour	85	2013	male	Instituto para a Investigação Interdisciplinar, Universidade de Lisboa, Lisboa, Portugal	Portugal	Europe	2.689	db	2	2	pos	db
LMDV572	Phosphorus-utilisation_efficiency_and_leaf-morphology_traits_of_Rytidosperma_species_(wallaby_grasses)_that_differ_in_their_growth_response_to_phosphorus_fertilisation	https://doi.org/10.1071/BT15202	Research_article	Heidi_A_Waddell	1	7	Australian_Journal_of_Botany	64	2016	female	CSIRO Agriculture, PO Box 1600, Canberra, ACT 2601, Australia	Australia	Oceania	1.386	sb	0	-5		sb
LMDV572	Phosphorus-utilisation_efficiency_and_leaf-morphology_traits_of_Rytidosperma_species_(wallaby_grasses)_that_differ_in_their_growth_response_to_phosphorus_fertilisation	https://doi.org/10.1071/BT15202	Research_article	Alan_E_Richardson	2	7	Australian_Journal_of_Botany	64	2016	male	CSIRO Agriculture, PO Box 1600, Canberra, ACT 2601, Australia	Australia	Oceania	1.386	sb	0	-5		sb
LMDV582	Temporal_vegetation_changes_in_a_seasonally_dry_tropical_forest_enclave_in_an_ecotonal_region_between_savanna_and_semiarid_zones_of_Brazil	https://doi.org/10.1071/BT16188	Research_article	Yule_Roberta_Ferreira_Nunes	2	7	Australian_Journal_of_Botany	65	2017	female	Department of General Biology, State University of Montes Claros, C.P. 126, CEP 39401-089, Montes Claros, Minas Gerais, Brazil.	Brazil	South_America	1.386	sb	1	-4		sb
LMDV582	Temporal_vegetation_changes_in_a_seasonally_dry_tropical_forest_enclave_in_an_ecotonal_region_between_savanna_and_semiarid_zones_of_Brazil	https://doi.org/10.1071/BT16188	Research_article	Geovany_Heitor_Reis	1	7	Australian_Journal_of_Botany	65	2017	male	Department of Forest Sciences, Federal University of Lavras, C.P. 3037, CEP 37200-000, Lavras, Minas Gerais, Brazil.	Brazil	South_America	1.386	sb	1	-4		sb
BSR566	Exposure_to_rodenticides_in_Northern_Spotted_and_Barred_Owls_on_remote_forest_lands_in_northwestern_California:_evidence_of_food_web_contamination	http://dx.doi.org/10.5751/ACE-01134-130102	Research_article	Shannon_Mendia	2	7	Avian_Conservation_and_Ecology	13	2018	female	Humboldt_State_University	USA	North_America	2.541	db	2	2		db
BSR585	Canada_Warbler_(Cardellina_canadensis):_novel_molecular_markers_and_a_preliminary_analysis_of_genetic_diversity_and_structure	http://dx.doi.org/10.5751/ACE-01176-130108	Short_communication	Brittney_A._Ferrari	1	7	Avian_Conservation_and_Ecology	13	2018	female	University_of_Georgia	USA	North_America	2.541	db	2	2		db
BSR566	Exposure_to_rodenticides_in_Northern_Spotted_and_Barred_Owls_on_remote_forest_lands_in_northwestern_California:_evidence_of_food_web_contamination	http://dx.doi.org/10.5751/ACE-01134-130102	Research_article	Mourad_W._Gabriel	1	7	Avian_Conservation_and_Ecology	13	2018	male	University_of_California	USA	North_America	2.541	db	2	2		db
BSR573	Characterization_of_Worm-eating_Warbler_(Helmitheros_vermivorum)_breeding_habitat_at_the_landscape_level_and_nest_scale	http://dx.doi.org/10.5751/ACE-01185-130111	Research_article	John_B._Dunning_Jr	2	7	Avian_Conservation_and_Ecology	13	2018	male	Purdue_University	USA	North_America	2.541	db	2	2		db
BSR573	Characterization_of_Worm-eating_Warbler_(Helmitheros_vermivorum)_breeding_habitat_at_the_landscape_level_and_nest_scale	http://dx.doi.org/10.5751/ACE-01185-130111	Research_article	Patrick_J._Ruhl	1	7	Avian_Conservation_and_Ecology	13	2018	male	Purdue_University	USA	North_America	2.541	db	2	2		db
BSR585	Canada_Warbler_(Cardellina_canadensis):_novel_molecular_markers_and_a_preliminary_analysis_of_genetic_diversity_and_structure	http://dx.doi.org/10.5751/ACE-01176-130108	Short_communication	Campbell_J._Nairn	2	7	Avian_Conservation_and_Ecology	13	2018	male	University_of_Georgia	USA	North_America	2.541	db	2	2		db
BSR604	Conservation_planning_for_boreal_birds_in_a_changing_climate:_a_framework_for_action	http://dx.doi.org/10.5751/ACE-01363-140113	Essay	Diana_Stralberg	1	7	Avian_Conservation_and_Ecology	14	2019	female	University_of_Alberta	Canada	North_America	2.541	db	3	3		db
BSR600	Estimating_the_conservation_value_of_protected_areas_in_Maritime_Canada_for_two_species_at_risk:_the_Olive-sided_Flycatcher_(Contopus_cooperi)_and_Canada_Warbler_(Cardellina_canadensis)	http://dx.doi.org/10.5751/ACE-01359-140116	Research_article	Alana_R._Westwood	1	7	Avian_Conservation_and_Ecology	14	2019	female	Boreal_Avian_Modelling_Project	Canada	North_America	2.541	db	3	3		db
BSR604	Conservation_planning_for_boreal_birds_in_a_changing_climate:_a_framework_for_action	http://dx.doi.org/10.5751/ACE-01363-140113	Essay	Junior_A._Tremblay	2	7	Avian_Conservation_and_Ecology	14	2019	male	Environment_and_Climate_Change_Canada	Canada	North_America	2.541	db	3	3		db
BSR600	Estimating_the_conservation_value_of_protected_areas_in_Maritime_Canada_for_two_species_at_risk:_the_Olive-sided_Flycatcher_(Contopus_cooperi)_and_Canada_Warbler_(Cardellina_canadensis)	http://dx.doi.org/10.5751/ACE-01359-140116	Research_article	Dan_Mazerolle	2	7	Avian_Conservation_and_Ecology	14	2019	male	Canadian_Forest_Service	Canada	North_America	2.541	db	3	3		db
BSR589	Influence_of_microhabitat_on_Honduran_Emerald_(Amazilia_luciae)_abundance_in_tropical_dry_forest_remnants	http://dx.doi.org/10.5751/ACE-01321-140103	Research_article	Fabiola_Rodríguez	1	7	Avian_Conservation_and_Ecology	14	2019	female	Indiana_University_of_Pennsylvania	USA	North_America	2.541	db	3	3		db
BSR602	Spatio-temporal_population_change_of_Arctic-breeding_waterbirds_on_the_Arctic_Coastal_Plain_of_Alaska	http://dx.doi.org/10.5751/ACE-01383-140118	Research_article	Courtney_L._Amundson	1	7	Avian_Conservation_and_Ecology	14	2019	female	U.S._Geological_Survey	USA	North_America	2.541	db	3	3		db
BSR589	Influence_of_microhabitat_on_Honduran_Emerald_(Amazilia_luciae)_abundance_in_tropical_dry_forest_remnants	http://dx.doi.org/10.5751/ACE-01321-140103	Research_article	Jeffery_L._Larkin	2	7	Avian_Conservation_and_Ecology	14	2019	male	Indiana_University_of_Pennsylvania	USA	North_America	2.541	db	3	3		db
BSR602	Spatio-temporal_population_change_of_Arctic-breeding_waterbirds_on_the_Arctic_Coastal_Plain_of_Alaska	http://dx.doi.org/10.5751/ACE-01383-140118	Research_article	Julian_B._Fischer	2	7	Avian_Conservation_and_Ecology	14	2019	male	U.S._Fish_and_Wildlife_Service	USA	North_America	2.541	db	3	3		db
BSR615	Modeling_the_occurrence_of_the_Yellow_Rail_(Coturnicops_noveboracensis)_in_the_context_of_ongoing_resource_development_in_the_oil_sands_region_of_Alberta	http://dx.doi.org/10.5751/ACE-01538-150110	Research_article	Erin_Bayne	2	7	Avian_Conservation_and_Ecology	15	2020	male	University_of_Alberta	Canada	North_America	2.541	db	4	4		db
BSR615	Modeling_the_occurrence_of_the_Yellow_Rail_(Coturnicops_noveboracensis)_in_the_context_of_ongoing_resource_development_in_the_oil_sands_region_of_Alberta	http://dx.doi.org/10.5751/ACE-01538-150110	Research_article	Richard_W._Hedley	1	7	Avian_Conservation_and_Ecology	15	2020	male	University_of_Alberta	Canada	North_America	2.541	db	4	4		db
BSR610	Habitat_selection_and_nest_survival_in_two_Great_Plains_shorebirds	http://dx.doi.org/10.5751/ACE-01487-150103	Research_article	Hannah_Specht	1	7	Avian_Conservation_and_Ecology	15	2020	female	University_of_Minnesota-Twin_Cities	USA	North_America	2.541	db	4	4		db
BSR610	Habitat_selection_and_nest_survival_in_two_Great_Plains_shorebirds	http://dx.doi.org/10.5751/ACE-01487-150103	Research_article	Todd_W._Arnold	2	7	Avian_Conservation_and_Ecology	15	2020	male	University_of_Minnesota-Twin_Cities	USA	North_America	2.541	db	4	4		db
BSR390	Relationship_of_visual_and_olfactory_signal_parameters_in_a_food-deceptive_flower_mimicry_system	https://doi.org/10.1093/beheco/arh147	Article	C._Giovanni_Galizia	1	7	Behavioral_Ecology	16	2005	male	University_of_California	USA	North_America	2.761	db	2	2	pos	db
BSR390	Relationship_of_visual_and_olfactory_signal_parameters_in_a_food-deceptive_flower_mimicry_system	https://doi.org/10.1093/beheco/arh147	Article	Randolf_Menzel	2	7	Behavioral_Ecology	16	2005	male	University_of_California	USA	North_America	2.761	db	2	2	pos	db
CCS	Light intensity limits foraging activity in nocturnal and crepuscular bees	https://doi.org/10.1093/beheco/arj001	Research_paper	Almut Kelber	1	7	Behavioral_Ecology	17	2006	female	Department for Cell and Organism Biology—Zoology, Lund University	Sweden	Europe	2.541	db	3	3	pos	db
CCS	Light intensity limits foraging activity in nocturnal and crepuscular bees	https://doi.org/10.1093/beheco/arj001	Research_paper	Robert A. Raguso	2	7	Behavioral_Ecology	17	2006	male	Department of Biological Sciences, University of South Carolina	USA	North_America	2.541	db	3	3	pos	db
LFLL64	The_Manú_Gradient_as_a_study_system_for_bird_pollination	https://doi.org/10.3897/BDJ.6.e22241	Research_article	Jill_E_Jankowski	2	7	Biodiversity_Data_Journal	6	2018	female	University_of_British_Columbia	Canada	North_America	1,33	sb	2	-3		sb
LFLL64	The_Manú_Gradient_as_a_study_system_for_bird_pollination	https://doi.org/10.3897/BDJ.6.e22241	Research_article	Mannfred_Boehm	1	7	Biodiversity_Data_Journal	6	2018	male	University_of_British_Columbia	Canada	North_America	1,33	sb	2	-3		sb
LFLL72	Photo_images,_3D/CT_data_and_mtDNA_of_the_freshwater_mussels_(Bivalvia:_Unionidae)_in_the_Kyushu_and_Ryukyu_Islands,_Japan,_with_SEM/EDS_analysis_of_the_shell	https://doi.org/10.3897/BDJ.7.e32114	Data_Paper	Takeshi_Yamasaki	2	7	Biodiversity_Data_Journal	7	2019	male	Yamashina_Institute_of_Ornithology	Japan	Asia	1,33	sb	3	-2		sb
LFLL72	Photo_images,_3D/CT_data_and_mtDNA_of_the_freshwater_mussels_(Bivalvia:_Unionidae)_in_the_Kyushu_and_Ryukyu_Islands,_Japan,_with_SEM/EDS_analysis_of_the_shell	https://doi.org/10.3897/BDJ.7.e32114	Data_Paper	Yuichi_Kano	1	7	Biodiversity_Data_Journal	7	2019	male	Kyushu_University	Japan	Asia	1,33	sb	3	-2		sb
LFLL93	Knock_knock,_who’s_there?:_marine_invertebrates_in_tubes_of_Ceriantharia_(Cnidaria:_Anthozoa)	https://doi.org/10.3897/BDJ.8.e47019	Research_article	Hellen_Ceriello	1	7	Biodiversity_Data_Journal	8	2020	female	Universidade_Estadual_Paulista	Brazil	South_America	1,33	sb	4	-1		sb
LFLL93	Knock_knock,_who’s_there?:_marine_invertebrates_in_tubes_of_Ceriantharia_(Cnidaria:_Anthozoa)	https://doi.org/10.3897/BDJ.8.e47019	Research_article	Sérgio_Stampar	2	7	Biodiversity_Data_Journal	8	2020	male	Universidade_Estadual_Paulista	Brazil	South_America	1,33	sb	4	-1		sb
LFLL128	Towards_a_catalogue_of_biodiversity_databases:_An_ontological_case_study	https://doi.org/10.3897/BDJ.8.e32765	Commentary	Jarrett_Blair	1	7	Biodiversity_Data_Journal	8	2020	male	University_of_Guelph	Canada	North_America	1,33	sb	4	-1		sb
LFLL128	Towards_a_catalogue_of_biodiversity_databases:_An_ontological_case_study	https://doi.org/10.3897/BDJ.8.e32765	Commentary	Robert_Hanner	2	7	Biodiversity_Data_Journal	8	2020	male	University_of_Guelph	Canada	North_America	1,33	sb	4	-1		sb
LFLL109	Cave_morphology,_microclimate_and_abundance_of_five_cave_predators_from_the_Monte_Albo_(Sardinia,_Italy)	https://doi.org/10.3897/BDJ.8.e48623	Data_Paper	Enrico_Lunghi	1	7	Biodiversity_Data_Journal	8	2020	male	Chinese_Academy_of_Sciences	China	Asia	1,33	sb	4	-1		sb
LFLL109	Cave_morphology,_microclimate_and_abundance_of_five_cave_predators_from_the_Monte_Albo_(Sardinia,_Italy)	https://doi.org/10.3897/BDJ.8.e48623	Data_Paper	Michael_Veith	2	7	Biodiversity_Data_Journal	8	2020	male	Universität_Trier	Germany	Europe	1,33	sb	4	-1		sb
LFLL94	Using_environmental_DNA_analyses_to_assess_the_occurrence_and_abundance_of_the_endangered_amphidromous_fish_Plecoglossus_altivelis_ryukyuensis	https://doi.org/10.3897/BDJ.8.e39679	Research_article	Yoshihisa_Akamatsu	1	7	Biodiversity_Data_Journal	8	2020	male	Yamaguchi_University	Japan	Asia	1,33	sb	4	-1		sb
LFLL94	Using_environmental_DNA_analyses_to_assess_the_occurrence_and_abundance_of_the_endangered_amphidromous_fish_Plecoglossus_altivelis_ryukyuensis	https://doi.org/10.3897/BDJ.8.e39679	Research_article	Yoshihisa_Kurita	2	7	Biodiversity_Data_Journal	8	2020	male	Kyushu_University	Japan	Asia	1,33	sb	4	-1		sb
LFLL123	The_InBIO_Barcoding_Initiative_Database:_DNA_barcodes_of_Portuguese_Diptera_01	https://doi.org/10.3897/BDJ.8.e49985	Data_Paper	Sonia_Ferreira	1	7	Biodiversity_Data_Journal	8	2020	female	Universidade_do_Porto	Portugal	Europe	1,33	sb	4	-1		sb
LFLL123	The_InBIO_Barcoding_Initiative_Database:_DNA_barcodes_of_Portuguese_Diptera_01	https://doi.org/10.3897/BDJ.8.e49985	Data_Paper	Pedro_Beja	2	7	Biodiversity_Data_Journal	8	2020	male	Universidade_do_Porto	Portugal	Europe	1,33	sb	4	-1		sb
CCS613	Establishment_of_the_reef-forming_tubeworm_Ficopomatus_enigmaticus_(Fauvel,_1923)_(Annelida:_Serpulidae)_in_southern_California	http://dx.doi.org/10.3391/bir.2016.5.1.033	Research_article	Christine_R._Whitcraft	2	7	Bioinvasions_Records	5	2016	female	California State University	USA	North_America	1,5	db	0	0		db
CCS613	Establishment_of_the_reef-forming_tubeworm_Ficopomatus_enigmaticus_(Fauvel,_1923)_(Annelida:_Serpulidae)_in_southern_California	http://dx.doi.org/10.3391/bir.2016.5.1.03	Research_article	Bruno_Pernet	1	7	Bioinvasions_Records	5	2016	male	California State University	USA	North_America	1,5	db	0	0		db
CCS648	Alien_scorpions_in_the_Municipality_of_São_Paulo,_Brazil_–_evidence_of_successful_establishment_of_Tityus_stigmurus_(Thorell,_1876)_and_first_records_of_Broteochactas_parvulus_Pocock,_1897,_and_Jaguajir_rochae_(Borelli,_1910)	https://doi.org/10.3391/bir.2018.7.1.14	Research_article	Rogério_Bertani	1	7	Bioinvasions_Records	7	2018	male	Instituto Butantan	Brazil	South_America	1,5	db	2	2		db
CCS648	Alien_scorpions_in_the_Municipality_of_São_Paulo,_Brazil_–_evidence_of_successful_establishment_of_Tityus_stigmurus_(Thorell,_1876)_and_first_records_of_Broteochactas_parvulus_Pocock,_1897,_and_Jaguajir_rochae_(Borelli,_1910)	https://doi.org/10.3391/bir.2018.7.1.144	Research_article	Sérgio_Cominato_Ferraz	2	7	Bioinvasions_Records	7	2018	male	Centro de Controle de Zoonoses de São Paulo	Brazil	South_America	1,5	db	2	2		db
CCS682	First_records_of_small_juveniles_of_the_red_drum_Sciaenops_ocellatus_(Linnaeus,_1766)_in_a_subtropical_mangrove_habitat_of_China	https://doi.org/10.3391/bir.2020.9.1.13	Research_article	Bai-an_Lin	1	7	Bioinvasions_Records	9	2020	female	State Key Laboratory of Marine Environmental Science, College of Ocean and Earth Sciences, Xiamen University, Xiamen, Fujian, China	China	Asia	1,5	db	4	4		db
CCS682	First_records_of_small_juveniles_of_the_red_drum_Sciaenops_ocellatus_(Linnaeus,_1766)_in_a_subtropical_mangrove_habitat_of_China	https://doi.org/10.3391/bir.2020.9.1.13	Research_article	Min_Liu	2	7	Bioinvasions_Records	9	2020	female	State Key Laboratory of Marine Environmental Science, College of Ocean and Earth Sciences, Xiamen University, Xiamen, Fujian, China	China	Asia	1,5	db	4	4		db
CCS681	First_record_of_the_Atlantic_spadefish_Chaetodipterus_faber_(Broussonet,_1782)_in_the_Mediterranean_Sea:_is_it_a_new_aquarium_release?	https://doi.org/10.3391/bir.2020.9.1.12	Research_article	Ioannis_Giovos	1	7	Bioinvasions_Records	9	2020	male	Sea, Environmental Organization for the Preservation of the Aquatic Ecosystems, Thessaloniki, Greece	Greece	Europe	1,5	db	4	4		db
CCS681	First_record_of_the_Atlantic_spadefish_Chaetodipterus_faber_(Broussonet,_1782)_in_the_Mediterranean_Sea:_is_it_a_new_aquarium_release?	https://doi.org/10.3391/bir.2020.9.1.12	Research_article	Nikos_Doumpas	1	7	Bioinvasions_Records	9	2020	male	Sea, Environmental Organization for the Preservation of the Aquatic Ecosystems, Thessaloniki, Greece	Greece	Europe	1,5	db	4	4		db
CCS670	The_first_record_of_Puccinia_abrupta_var._partheniicola,_on_Parthenium_hysterophorus_an_invasive_alien_plant_species_in_Pakistan	https://doi.org/10.3391/bir.2020.9.1.01	Rapid_Communication	Iram_M._Iqbal	1	7	Bioinvasions_Records	9	2020	female	Department of Botany, University of the Punjab, Quaid-e-Azam campus, Lahore, Pakistan	Pakistan	Asia	1,5	db	4	4		db
CCS670	The_first_record_of_Puccinia_abrupta_var._partheniicola,_on_Parthenium_hysterophorus_an_invasive_alien_plant_species_in_Pakistan	https://doi.org/10.3391/bir.2020.9.1.01	Rapid_Communication	Philip_Weyl	2	7	Bioinvasions_Records	9	2020	male	CABI Switzerland, Rue des Grillons 1, 2800 Delémont, Switzerland	Switzerland	Europe	1,5	db	4	4		db
MBS201	Cloudy_with_a_chance_of_speciation:_integrative_taxonomy_reveals_extraordinary_divergence_within_a_Mesoamerican_cloud_forest_bird	https://doi.org/10.1093/biolinnean/bly156	Original_article	Madhvi_X_Venkatraman	1	7	Biological_Journal_Of_The_Linnean_Society	126	2019	female	Occidental_College	USA	North_America	1,96	sb	3	-2		sb
MBS201	Cloudy_with_a_chance_of_speciation:_integrative_taxonomy_reveals_extraordinary_divergence_within_a_Mesoamerican_cloud_forest_bird	https://doi.org/10.1093/biolinnean/bly156	Original_article	John_E_Mccormack	2	7	Biological_Journal_Of_The_Linnean_Society	126	2019	male	Occidental_College	USA	North_America	1,96	sb	3	-2		sb
LMDV42	Effectiveness_of_Vegetation_Surrogates_for_Parasitoid_Wasps_in_Reserve_Selection_	https://doi.org/10.1111/j.1523-1739.2008.01069.x	Contributed_papers	Sally_E_M_Fraser	1	7	Conservation_Biology	23	2009	female	University_of_York	UK	Europe	5.405	db	-5	-5	pre	sb
LMDV43	Plant_Diversity_Hotspots_in_the_Atlantic_Coastal_Forests_of_Brazil_	https://doi.org/10.1111/j.1523-1739.2008.01075.x	Contributed_papers	Charlotte_Murray-Smith	1	7	Conservation_Biology	23	2009	female	University_of_Manchester	UK	Europe	5.405	db	-5	-5	pre	sb
LMDV43	Plant_Diversity_Hotspots_in_the_Atlantic_Coastal_Forests_of_Brazil_	https://doi.org/10.1111/j.1523-1739.2008.01075.x	Contributed_papers	Eve_J_Lucas	2	7	Conservation_Biology	23	2009	female	University_of_Manchester	UK	Europe	5.405	db	-5	-5	pre	sb
LMDV42	Effectiveness_of_Vegetation_Surrogates_for_Parasitoid_Wasps_in_Reserve_Selection_	https://doi.org/10.1111/j.1523-1739.2008.01069.x	Contributed_papers	Calvin_Dytham	2	7	Conservation_Biology	23	2009	male	University_of_York	UK	Europe	5.405	db	-5	-5	pre	sb
LMDV138	Eliciting_Expert_Knowledge_in_Conservation_Science	https://doi.org/10.1111/j.1523-1739.2011.01806.x	Review	Kerrie_Mengersen	2	7	Conservation_Biology	26	2012	female	Queensland University of Technology	Australia	Oceania	5.405	db	-2	-2	pre	sb
LMDV138	Eliciting_Expert_Knowledge_in_Conservation_Science	https://doi.org/10.1111/j.1523-1739.2011.01806.x	Review	Tara_G_Martin	1	7	Conservation_Biology	26	2012	female	CSIRO Ecosystem Science	Australia	Oceania	5.405	db	-2	-2	pre	sb
LMDV144	Assessing_the_Effectiveness_of_Marine_Reserves_on_Unsustainably_Harvested_Long-Lived_Sessile_Invertebrates	https://doi.org/10.1111/j.1523-1739.2011.01795.x	Contributed_papers	Cristina_Linares	1	7	Conservation_Biology	26	2012	female	Universitat de Barcelona	Spain	Europe	5.405	db	-2	-2	pre	sb
LMDV144	Assessing_the_Effectiveness_of_Marine_Reserves_on_Unsustainably_Harvested_Long-Lived_Sessile_Invertebrates	https://doi.org/10.1111/j.1523-1739.2011.01795.x	Contributed_papers	Mikel_Zabala	2	7	Conservation_Biology	26	2012	male	Universitat de Barcelona	Spain	Europe	5.405	db	-2	-2	pre	sb
LMDV268	Effects_of_reduced_water_quality_on_coral_reefs_in_and_out_of_no-take_marine_reserves	https://doi.org/10.1111/cobi.12576	Contributed_papers	Amelia_Wenger	1	7	Conservation_Biology	30	2016	female	James Cook University	Australia	Oceania	5.405	db	0	0	pos	db
LMDV268	Effects_of_reduced_water_quality_on_coral_reefs_in_and_out_of_no-take_marine_reserves	https://doi.org/10.1111/cobi.12576	Contributed_papers	Michelle_Devlin	2	7	Conservation_Biology	30	2016	female	James Cook University	Australia	Oceania	5.405	db	0	0	pos	db
LMDV275	Using_Twitter_to_communicate_conservation_science_from_a_professional_conference	https://doi.org/10.1111/cobi.12570	Contributed_papers	Sara_bombaci	1	7	Conservation_Biology	30	2016	female	Colorado State University	USA	North_America	5.405	db	0	0	pos	db
LMDV275	Using_Twitter_to_communicate_conservation_science_from_a_professional_conference	https://doi.org/10.1111/cobi.12570	Contributed_papers	Liba_Pejchar	2	7	Conservation_Biology	30	2016	female	Colorado State University	USA	North_America	5.405	db	0	0	pos	db
LMDV280	Developing_a_theory_of_change_for_a_community-based_response_to_illegal_wildlife_trade	https://doi.org/10.1111/cobi.12796	Conservation_and_policy	Duan_Biggs	1	7	Conservation_Biology	31	2017	male	Griffith University	Australia	Oceania	5.405	db	1	1	pos	db
LMDV280	Developing_a_theory_of_change_for_a_community-based_response_to_illegal_wildlife_trade	https://doi.org/10.1111/cobi.12796	Conservation_and_policy	Diane_Skinner	2	7	Conservation_Biology	31	2017	female	IUCN SSC African Elephant Specialist Group	Kenya	Africa	5.405	db	1	1	pos	db
LMDV309	Managing_conflict_between_large_carnivores_and_livestock	https://doi.org/10.1111/cobi.12959	Review	Lily_van_Eeden	1	7	Conservation_Biology	32	2018	female	University of Sydney	Australia	Oceania	5.405	db	2	2	pos	db
LMDV318	Bias_in_protected-area_location_and_its_effects_on_long-term_aspirations_of_biodiversity_conventions	https://doi.org/10.1111/cobi.12970	contributed_papers	James_Watson	2	7	Conservation_Biology	32	2018	male	University of Queensland	Australia	Oceania	5.405	db	2	2	pos	db
LMDV325	Using_soundscapes_to_detect_variable_degrees_of_human_influence_on_tropical_forests_in_Papua_New_Guinea	https://doi.org/10.1111/cobi.12968	contributed_papers	Edward_Game	2	7	Conservation_Biology	32	2018	male	University of Queensland	Australia	Oceania	5.405	db	2	2	pos	db
LMDV309	Managing_conflict_between_large_carnivores_and_livestock	https://doi.org/10.1111/cobi.12959	Review	Thomas_Newsome	2	7	Conservation_Biology	32	2018	male	University of Sydney	Australia	Oceania	5.405	db	2	2	pos	db
LMDV318	Bias_in_protected-area_location_and_its_effects_on_long-term_aspirations_of_biodiversity_conventions	https://doi.org/10.1111/cobi.12970	contributed_papers	Oscar_Venter	1	7	Conservation_Biology	32	2018	male	University of Northern British Columbia	Canada	North_America	5.405	db	2	2	pos	db
LMDV325	Using_soundscapes_to_detect_variable_degrees_of_human_influence_on_tropical_forests_in_Papua_New_Guinea	https://doi.org/10.1111/cobi.12968	contributed_papers	Zuzana_Burivalova	1	7	Conservation_Biology	32	2018	female	Princeton University	USA	North_America	5.405	db	2	2	pos	db
BSR	Combined use of eDNA metabarcoding and video surveillance for the assessment of fish biodiversity	https://conbio.onlinelibrary.wiley.com/doi/10.1111/cobi.13183	Conservation Methods	Michael S	1	7	Conservation_Biology	33	2019	male		Australia			db	3	3	pos	db
BSR	Combined use of eDNA metabarcoding and video surveillance for the assessment of fish biodiversity	https://conbio.onlinelibrary.wiley.com/doi/10.1111/cobi.13183	Conservation Methods	Euan Harvey	2	7	Conservation_Biology	33	2019	male		Australia			db	3	3	pos	db
CCS	A spatially explicit empirical model of structural development processes in natural forests based on climate and topography	https://doi.org/10.1111/cobi.13370	Contributed Papers	Yuichi Yamaura	1	7	Conservation_Biology	34	2020	male		Japan			db	4	4	pos	db
CCS	A spatially explicit empirical model of structural development processes in natural forests based on climate and topography	https://doi.org/10.1111/cobi.13370	Contributed Papers	Takashi Masaki	2	7	Conservation_Biology	34	2020	male		Japan			db	4	4	pos	db
LFLL132	Global_Biodiversity_Indicators_Reflect_the_Modeled_Impacts_of_Protected_Area_Policy_Change	https://doi.org/10.1111/conl.12163	Letter	Emily_Nicholson	2	7	Conservation_Letters	9	2016	female	Imperial_College_London	UK	Europe	6.766	sb	0	-5		sb
LFLL132	Global_Biodiversity_Indicators_Reflect_the_Modeled_Impacts_of_Protected_Area_Policy_Change	https://doi.org/10.1111/conl.12163	Letter	Brendan_Costelloe	1	7	Conservation_Letters	9	2016	male	Imperial_College_London	UK	Europe	6.766	sb	0	-5		sb
LFLL151	Analysis_of_Trade‐Offs_Between_Biodiversity,_Carbon_Farming_and_Agricultural_Development_in_Northern_Australia_Reveals_the_Benefits_of_Strategic_Planning	https://doi.org/10.1111/conl.12255	Letter	Alejandra_Morán-Ordóñez	1	7	Conservation_Letters	10	2017	female	The_University_of_Melbourne	Australia	Oceania	6.766	sb	1	-4		sb
LFLL156	“Devil_Tools_&_Tech”:_A_Synergy_of_Conservation_Research_and_Management_Practice	https://doi.org/10.1111/conl.12221	Policy_Perspectives	Carolyn_J_Hogg	1	7	Conservation_Letters	10	2017	female	Zoo_and_Aquarium_Association_Australasia	Australia	Oceania	6.766	sb	1	-4		sb
LFLL156	“Devil_Tools_&_Tech”:_A_Synergy_of_Conservation_Research_and_Management_Practice	https://doi.org/10.1111/conl.12221	Policy_Perspectives	Katherine_Belov	2	7	Conservation_Letters	10	2017	female	University_of_Sydney	Australia	Oceania	6.766	sb	1	-4		sb
LFLL151	Analysis_of_Trade‐Offs_Between_Biodiversity,_Carbon_Farming_and_Agricultural_Development_in_Northern_Australia_Reveals_the_Benefits_of_Strategic_Planning	https://doi.org/10.1111/conl.12255	Letter	Brendan_A_Wintle	2	7	Conservation_Letters	10	2017	male	The_University_of_Melbourne	Australia	Oceania	6.766	sb	1	-4		sb
LFLL153	Making_the_EU_Legislation_on_Invasive_Species_a_Conservation_Success	https://doi.org/10.1111/conl.12214	Policy_Perspectives	Assaf_Shwartz	2	7	Conservation_Letters	10	2017	male	Faculty_of_Architecture_and_Town_Planning	Israel	Asia	6.766	sb	1	-4		sb
LFLL153	Making_the_EU_Legislation_on_Invasive_Species_a_Conservation_Success	https://doi.org/10.1111/conl.12214	Policy_Perspectives	Simon_Tollington	1	7	Conservation_Letters	10	2017	male	University_of_Kent	UK	Europe	6.766	sb	1	-4		sb
LFLL166	Fuzzy_Models_to_Inform_Social_and_Environmental_Indicator_Selection_for_Conservation_Impact_Monitoring	https://doi.org/10.1111/conl.12338	Letter	Edward_T_Game	1	7	Conservation_Letters	11	2018	male	The_Nature_Conservancy	Australia	Oceania	6.766	sb	2	-3		sb
LFLL166	Fuzzy_Models_to_Inform_Social_and_Environmental_Indicator_Selection_for_Conservation_Impact_Monitoring	https://doi.org/10.1111/conl.12338	Letter	Lina_M_Rodríguez	2	7	Conservation_Letters	11	2018	female	Unaffiliated	Colombia	South_America	6.766	sb	2	-3		sb
LFLL169	Social_Media_Data_Can_Be_Used_to_Understand_Tourists’_Preferences_for_Nature‐Based_Experiences_in_Protected_Areas	https://doi.org/10.1111/conl.12343	Letter	Anna_Hausmann	1	7	Conservation_Letters	11	2018	female	University_of_KwaZulu-Natal	South_Africa	Africa	6.766	sb	2	-3		sb
LFLL169	Social_Media_Data_Can_Be_Used_to_Understand_Tourists’_Preferences_for_Nature‐Based_Experiences_in_Protected_Areas	https://doi.org/10.1111/conl.12343	Letter	Enrico_Di_Minin	2	7	Conservation_Letters	11	2018	male	University_of_KwaZulu-Natal	South_Africa	Africa	6.766	sb	2	-3		sb
LFLL168	Accounting_for_Life‐History_Strategies_and_Timescales_in_Marine_Restoration	https://doi.org/10.1111/conl.12341	Letter	Cristina_Linares	2	7	Conservation_Letters	11	2018	female	Universitat_de_Barcelona	Spain	Europe	6.766	sb	2	-3		sb
LFLL168	Accounting_for_Life‐History_Strategies_and_Timescales_in_Marine_Restoration	https://doi.org/10.1111/conl.12341	Letter	Ignasi_Montero-Serra	1	7	Conservation_Letters	11	2018	male	Universitat_de_Barcelona	Spain	Europe	6.766	sb	2	-3		sb
LFLL181	Endangered_Species,_Ecosystem_Integrity,_and_Human_Livelihoods	https://doi.org/10.1111/conl.12358	Policy_Perspectives	Brad_Erisman	2	7	Conservation_Letters	11	2018	male	University_of_Texas	USA	North_America	6.766	sb	2	-3		sb
LFLL181	Endangered_Species,_Ecosystem_Integrity,_and_Human_Livelihoods	https://doi.org/10.1111/conl.12358	Policy_Perspectives	Octavio_Aburto-Oropeza	1	7	Conservation_Letters	11	2018	male	Scripps_Institution_of_Oceanography	USA	North_America	6.766	sb	2	-3		sb
LFLL215	Biodiversity_means_business:_Reframing_global_biodiversity_goals_for_the_private_sector	https://doi.org/10.1111/conl.12690	Policy_Perspectives	Prue_FE_Addison	2	7	Conservation_Letters	13	2020	female	University_of_Oxford	UK	Europe	6.766	sb	4	-1		sb
LFLL215	Biodiversity_means_business:_Reframing_global_biodiversity_goals_for_the_private_sector	https://doi.org/10.1111/conl.12690	Policy_Perspectives	Thomas_Smith	1	7	Conservation_Letters	13	2020	male	University_of_Leeds	UK	Europe	6.766	sb	4	-1		sb
LFLL210	An_experimental_test_of_community‐based_strategies_for_mitigating_human–wildlife_conflict_around_protected_areas	https://doi.org/10.1111/conl.12679	Letter	Paola_S_Branco	1	7	Conservation_Letters	13	2020	female	University_of_Idaho	USA	North_America	6.766	sb	4	-1		sb
LFLL210	An_experimental_test_of_community‐based_strategies_for_mitigating_human–wildlife_conflict_around_protected_areas	https://doi.org/10.1111/conl.12679	Letter	Ryan_A_Long	2	7	Conservation_Letters	13	2020	male	University_of_Idaho	USA	North_America	6.766	sb	4	-1		sb
LMDV379	Overcoming_societal_addictions:_What_can_we_learn_from_individual_therapies?,	https://doi.org/10.1016/j.ecolecon.2016.09.023.	Research_article	Ida_Kubiszewski	2	7	Ecological_Economics	131	2017	female	Australian National University	Australia	Oceania	4.482	sb	1	-4		sb
LMDV379	Overcoming_societal_addictions:_What_can_we_learn_from_individual_therapies?,	https://doi.org/10.1016/j.ecolecon.2016.09.023.	Research_article	Robert_Costanza	1	7	Ecological_Economics	131	2017	male	Australian National University	Australia	Oceania	4.482	sb	1	-4		sb
LMDV461	Taking_stock_of_the_empirical_evidence_on_the_insurance_value_of_ecosystems	https://doi.org/10.1016/j.ecolecon.2019.106451	Research_article	Jouni_Paavola	2	7	Ecological_Economics	167	2020	male	University of Leeds	UK	Europe	4.482	sb	4	-1		sb
LMDV461	Taking_stock_of_the_empirical_evidence_on_the_insurance_value_of_ecosystems	https://doi.org/10.1016/j.ecolecon.2019.106451	Research_article	Martin_Dallimer	1	7	Ecological_Economics	167	2020	male	University of Leeds	UK	Europe	4.482	sb	4	-1		sb
BSR28	Theorizing_benefits_and_constraints_in_collaborative_environmental_governance:_a_transdisciplinary_social-ecological_network_approach_for_empirical_investigations	http://dx.doi.org/10.5751/ES-08368-210140	Research_article	Örjan_Bodin	1	7	Ecology_and_Society	21	2016	male	Stockholm_University	Sweden	Europe	3,89	db	0	0		db
BSR28	Theorizing_benefits_and_constraints_in_collaborative_environmental_governance:_a_transdisciplinary_social-ecological_network_approach_for_empirical_investigations	http://dx.doi.org/10.5751/ES-08368-210140	Research_article	Mark_Lubell	2	7	Ecology_and_Society	21	2016	male	University_of_California_at_Davis	USA	North_America	3,89	db	0	0		db
BSR70	Assessing_temporal_couplings_in_social–ecological_island_systems:_historical_deforestation_and_soil_loss_on_Mauritius_(Indian_Ocean)	http://dx.doi.org/10.5751/ES-09073-220129	Research_article	Sietze_Johannes_Norder	1	7	Ecology_and_Society	22	2017	male	Universidade_de_Lisboa_(UL)	Portugal	Europe	3,89	db	1	1		db
BSR92	The_contribution_of_sense_of_place_to_social-ecological_systems_research:_a_review_and_research_agenda	http://dx.doi.org/10.5751/ES-08872-220149	Synthesis	Vanessa_A_Masterson	1	7	Ecology_and_Society	22	2017	female	Stockholm_University	Sweden	Europe	3,89	db	1	1		db
BSR92	The_contribution_of_sense_of_place_to_social-ecological_systems_research:_a_review_and_research_agenda	http://dx.doi.org/10.5751/ES-08872-220149	Synthesis	Uno_Svedin	2	7	Ecology_and_Society	22	2017	male	Stockholm_University	Sweden	Europe	3,89	db	1	1		db
BSR70	Assessing_temporal_couplings_in_social–ecological_island_systems:_historical_deforestation_and_soil_loss_on_Mauritius_(Indian_Ocean)	http://dx.doi.org/10.5751/ES-09073-220129	Research_article	Kenneth_F._Rijsdijk	2	7	Ecology_and_Society	22	2017	male	University_of_Amsterdam_(UvA)	The_Netherlands	Europe	3,89	db	1	1		db
BSR88	Social-ecological_enabling_conditions_for_payments_for_ecosystem_services	http://dx.doi.org/10.5751/ES-08979-220118	Synthesis	Chelsie_L._Romulo	2	7	Ecology_and_Society	22	2017	female	George_Mason_University	USA	North_America	3,89	db	1	1		db
BSR88	Social-ecological_enabling_conditions_for_payments_for_ecosystem_services	http://dx.doi.org/10.5751/ES-08979-220118	Synthesis	Heidi_R._Huber-Stearns	1	7	Ecology_and_Society	22	2017	female	University_of_Oregon	USA	North_America	3,89	db	1	1		db
BSR62	A_distribution_analysis_of_the_central_Maya_lowlands_ecoinformation_network:_its_rises,_falls,_and_changes	http://dx.doi.org/10.5751/ES-08931-220120	Research_article	Beniamino_Volta	2	7	Ecology_and_Society	22	2017	male	University_of_California	USA	North_America	3,89	db	1	1		db
BSR62	A_distribution_analysis_of_the_central_Maya_lowlands_ecoinformation_network:_its_rises,_falls,_and_changes	http://dx.doi.org/10.5751/ES-08931-220120	Research_article	Joel_D._Gunn	1	7	Ecology_and_Society	22	2017	male	University_of_North_Carolina_Greensboro	USA	North_America	3,89	db	1	1		db
BSR136	From_concepts_to_practice:_combining_different_approaches_to_understand_drivers_of_landscape_change	http://dx.doi.org/10.5751/ES-09910-230125	Insight	Thanasis_Kizos	1	7	Ecology_and_Society	23	2018	male	University_of_the_Aegean	Greece	Europe	3,89	db	2	2		db
BSR136	From_concepts_to_practice:_combining_different_approaches_to_understand_drivers_of_landscape_change	http://dx.doi.org/10.5751/ES-09910-230125	Insight	Thomas_Balatsos	2	7	Ecology_and_Society	23	2018	male	University_of_the_Aegean	Greece	Europe	3,89	db	2	2		db
BSR120	Recovery_and_adaptation_after_the_2015_Nepal_earthquakes:_a_smallholder_household_perspective	http://dx.doi.org/10.5751/ES-09909-230129	Research_article	Inger_E._Måren	2	7	Ecology_and_Society	23	2018	female	University_of_Bergen	Norway	Europe	3,89	db	2	2		db
BSR122	Managing_urban_flood_resilience_as_a_multilevel_governance_challenge:_an_analysis_of_required_multilevel_coordination_mechanisms	http://dx.doi.org/10.5751/ES-09962-230131	Research_article	Piotr_Matczak	2	7	Ecology_and_Society	23	2018	male	Adam_Mickiewicz_University	Poland	Europe	3,89	db	2	2		db
BSR103	The_agrarian_metabolism_as_a_tool_for_assessing_agrarian_sustainability,_and_its_application_to_Spanish_agriculture_(1960-2008)	http://dx.doi.org/10.5751/ES-09773-230102	Research_article	Gloria_I_Guzmán	1	7	Ecology_and_Society	23	2018	female	Universidad_Pablo_de_Olavide_(Seville)	Spain	Europe	3,89	db	2	2		db
BSR103	The_agrarian_metabolism_as_a_tool_for_assessing_agrarian_sustainability,_and_its_application_to_Spanish_agriculture_(1960-2008)	http://dx.doi.org/10.5751/ES-09773-230102	Research_article	Manuel_González_de_Molina	2	7	Ecology_and_Society	23	2018	male	Universidad_Pablo_de_Olavide_(Seville)	Spain	Europe	3,89	db	2	2		db
BSR122	Managing_urban_flood_resilience_as_a_multilevel_governance_challenge:_an_analysis_of_required_multilevel_coordination_mechanisms	http://dx.doi.org/10.5751/ES-09962-230131	Research_article	Carel_Dieperink	1	7	Ecology_and_Society	23	2018	male	Utrecht_University	The_Netherlands	Europe	3,89	db	2	2		db
BSR102	Adaptive_pathways_and_coupled_infrastructure:_seven_centuries_of_adaptation_to_water_risk_and_the_production_of_vulnerability_in_Mexico_City	http://dx.doi.org/10.5751/ES-09712-230101	Research_article	Beth_Tellman	1	7	Ecology_and_Society	23	2018	female	Arizona_State_University	USA	North_America	3,89	db	2	2		db
BSR120	Recovery_and_adaptation_after_the_2015_Nepal_earthquakes:_a_smallholder_household_perspective	http://dx.doi.org/10.5751/ES-09909-230129	Research_article	Kathleen_Epstein	1	7	Ecology_and_Society	23	2018	female	Montana_State_University	USA	North_America	3,89	db	2	2		db
BSR102	Adaptive_pathways_and_coupled_infrastructure:_seven_centuries_of_adaptation_to_water_risk_and_the_production_of_vulnerability_in_Mexico_City	http://dx.doi.org/10.5751/ES-09712-230101	Research_article	Charles_L._Redman	2	7	Ecology_and_Society	23	2018	male	Arizona_State_University	USA	North_America	3,89	db	2	2		db
BSR154	Toward_understanding_the_dynamics_of_land_change_in_Latin_America:_potential_utility_of_a_resilience_approach_for_building_archetypes_of_land-systems_change	http://dx.doi.org/10.5751/ES-10349-240117	Research_article	Cecilia_C._Gelabert	2	7	Ecology_and_Society	24	2019	female	Universidad_de_Buenos_Aires,_Facultad_de_Agronomía	Argentina	South_America	3,89	db	3	3		db
BSR154	Toward_understanding_the_dynamics_of_land_change_in_Latin_America:_potential_utility_of_a_resilience_approach_for_building_archetypes_of_land-systems_change	http://dx.doi.org/10.5751/ES-10349-240117	Research_article	Juan_C._Rocha	1	7	Ecology_and_Society	24	2019	male	Stockholm_University	Sweden	Europe	3,89	db	3	3		db
LMDV16	_Understanding_the_attributes_of_the_dual_oasis_effect_in_an_arid_region_using_remote_sensing_and_observational_data	https://doi.org/10.1080/20964129.2019.1696153	Research_article	Ju_Wang	2	7	Ecosystem_Health_and_Sustainability	6	2020	male	Lanzhou_University	China	Asia	2.315	db	4	4		db
LMDV16	_Understanding_the_attributes_of_the_dual_oasis_effect_in_an_arid_region_using_remote_sensing_and_observational_data	https://doi.org/10.1080/20964129.2019.1696153	Research_article	Qiang_Bie	1	7	Ecosystem_Health_and_Sustainability	6	2020	male	Lanzhou_University	China	Asia	2.315	db	4	4		db
LMDV18	_Harnessing_perennial_and_indeterminant_growth_habits_for_ratoon_cotton_(Gossypium_spp.)_cropping	https://doi.org/10.1080/20964129.2020.1715264	Review	Xin_Zhang	1	7	Ecosystem_Health_and_Sustainability	6	2020	male	Henan_Institute_Of_science_and_Technology	China	Asia	2.315	db	4	4		db
LMDV525	Species_diversity_of_insects_in_Japan:_Their_origins_and_diversification_processes	https://doi.org/10.1111/ens.12261	Review	Koji_Tojo	1	7	Entomological_Science	20	2017	male	Shinshu University	Japan	Asia	1.074	sb	1	-4		sb
LMDV525	Species_diversity_of_insects_in_Japan:_Their_origins_and_diversification_processes	https://doi.org/10.1111/ens.12261	Review	Sean_D_Schoville	2	7	Entomological_Science	20	2017	male	University of Wisconsin‐Madison	USA	North_America	1.074	sb	1	-4		sb
LMDV542	The_parasitoid_wasp_Eruga_unilabiana_Pádua_&_Sobczak,_sp._nov._(Hymenoptera:_Ichneumonidae)_induces_behavioral_modification_in_its_spider_host	https://doi.org/10.1111/ens.12278	Original_article	Jober_F_Sobczak	1	7	Entomological_Science	21	2018	male	Instituto de Ciências Exatas e da Natureza, Universidade da Integração Internacional da Lusofonia Afro‐Brasileira – UNILAB, Brazil	Brazil	South_America	1.074	sb	2	-3		sb
LMDV542	The_parasitoid_wasp_Eruga_unilabiana_Pádua_&_Sobczak,_sp._nov._(Hymenoptera:_Ichneumonidae)_induces_behavioral_modification_in_its_spider_host	https://doi.org/10.1111/ens.12278	Original_article	Yuri_F_Messas	2	7	Entomological_Science	21	2018	male	Departamento de Biologia Animal, Universidade Estadual de Campinas – UNICAMP, Brazil	Brazil	South_America	1.074	sb	2	-3		sb
LFLL241	Limb_patterning_genes_and_heterochronic_development_of_the_emu_wing_bud	https://doi.org/10.1186/s13227-016-0063-5	Research_article	Craig_A_Smith	1	7	EvoDevo	7	2016	male	Monash_University	Australia	Oceania	2.146	sb	0	-5		sb
LFLL241	Limb_patterning_genes_and_heterochronic_development_of_the_emu_wing_bud	https://doi.org/10.1186/s13227-016-0063-5	Research_article	David_M_Lambert	2	7	EvoDevo	7	2016	male	Griffith_University	Australia	Oceania	2.146	sb	0	-5		sb
LFLL222	HOX_gene_complement_and_expression_in_the_planarian_Schmidtea_mediterranea	https://doi.org/10.1186/s13227-016-0044-8	Short_research_article	Bret_J_Pearson	2	7	EvoDevo	7	2016	male	Hospital_for_Sick_Children	Canada	North_America	2.146	sb	0	-5		sb
LFLL222	HOX_gene_complement_and_expression_in_the_planarian_Schmidtea_mediterranea	https://doi.org/10.1186/s13227-016-0044-8	Short_research_article	Ko_W_Currie	1	7	EvoDevo	7	2016	male	Hospital_for_Sick_Children	Canada	North_America	2.146	sb	0	-5		sb
LFLL264	Comparing_growth_in_surface_and_cave_morphs_of_the_species_Astyanax_mexicanus:_insights_from_scales	https://doi.org/10.1186/s13227-017-0086-6	Research_article	Sylvie_Rétaux	2	7	EvoDevo	8	2017	female	Paris-Saclay_Institute_of_Neuroscience	France	Europe	2.146	sb	1	-4		sb
LFLL264	Comparing_growth_in_surface_and_cave_morphs_of_the_species_Astyanax_mexicanus:_insights_from_scales	https://doi.org/10.1186/s13227-017-0086-6	Research_article	Victor_Simon	1	7	EvoDevo	8	2017	male	Paris-Saclay_Institute_of_Neuroscience	France	Europe	2.146	sb	1	-4		sb
LFLL277	Expression_of_meis_and_hoxa11_in_dipnoan_and_teleost_fins_provides_new_insights_into_the_evolution_of_vertebrate_appendages	https://doi.org/10.1186/s13227-018-0099-9	Research_article	Paolo_Sordino	2	7	EvoDevo	9	2018	male	Stazione_Zoologica_Anton_Dohrn	Italy	Europe	2.146	sb	2	-3		sb
LFLL277	Expression_of_meis_and_hoxa11_in_dipnoan_and_teleost_fins_provides_new_insights_into_the_evolution_of_vertebrate_appendages	https://doi.org/10.1186/s13227-018-0099-9	Research_article	Fernanda_Langellotto	1	7	EvoDevo	9	2018	female	Dragonfly_Therapeutics_Inc.	USA	North_America	2.146	sb	2	-3		sb
LFLL321	Putative_stem_cells_in_the_hemolymph_and_in_the_intestinal_submucosa_of_the_solitary_ascidian_Styela_plicata	https://doi.org/10.1186/s13227-019-0144-3	Research_article	Federico_D_Brown	2	7	EvoDevo	10	2019	male	Universidade_de_São_Paulo	Brazil	South_America	2.146	sb	3	-2		sb
LFLL321	Putative_stem_cells_in_the_hemolymph_and_in_the_intestinal_submucosa_of_the_solitary_ascidian_Styela_plicata	https://doi.org/10.1186/s13227-019-0144-3	Research_article	Juan_Jiménez-Merino	1	7	EvoDevo	10	2019	male	Universidade_de_São_Paulo	Brazil	South_America	2.146	sb	3	-2		sb
LFLL296	Establishment_of_the_mayfly_Cloeon_dipterum_as_a_new_model_system_to_investigate_insect_evolution	https://doi.org/10.1186/s13227-019-0120-y	Review	Isabel_Almudi	1	7	EvoDevo	10	2019	female	Centro_Andaluz_de_Biología_del_Desarrollo	Spain	Europe	2.146	sb	3	-2		sb
LFLL296	Establishment_of_the_mayfly_Cloeon_dipterum_as_a_new_model_system_to_investigate_insect_evolution	https://doi.org/10.1186/s13227-019-0120-y	Review	Fernando_Casares	2	7	EvoDevo	10	2019	male	Centro_Andaluz_de_Biología_del_Desarrollo	Spain	Europe	2.146	sb	3	-2		sb
LFLL334	Can_the_anatomy_of_abnormal_flowers_elucidate_relationships_of_the_androecial_members_in_the_ginger_(Zingiberaceae)?	https://doi.org/10.1186/s13227-020-00157-8	Research_article	Xiumei_Li	1	7	EvoDevo	11	2020	female	Guangdong_Academy_of_Agricultural_Sciences	China	Asia	2.146	sb	4	-1		sb
LFLL334	Can_the_anatomy_of_abnormal_flowers_elucidate_relationships_of_the_androecial_members_in_the_ginger_(Zingiberaceae)?	https://doi.org/10.1186/s13227-020-00157-8	Research_article	Jingping_Liao	2	7	EvoDevo	11	2020	male	Chinese_Academy_of_Sciences	China	Asia	2.146	sb	4	-1		sb
LFLL338	Evolution_and_development_of_three_highly_specialized_floral_structures_of_bee-pollinated_Phalaenopsis_species	https://doi.org/10.1186/s13227-020-00160-z	Research_article	Barbara_Gravendeel	2	7	EvoDevo	11	2020	female	Naturalis_Biodiversity_Center	The_Netherlands	Europe	2.146	sb	4	-1		sb
LFLL338	Evolution_and_development_of_three_highly_specialized_floral_structures_of_bee-pollinated_Phalaenopsis_species	https://doi.org/10.1186/s13227-020-00160-z	Research_article	Dewi_Pramanik	1	7	EvoDevo	11	2020	female	Naturalis_Biodiversity_Center	The_Netherlands	Europe	2.146	sb	4	-1		sb
CCS463	Taxonomic_and_functional_composition_of_arthropod_assemblages_across_contrasting_Amazonian_forests	https://doi.org/10.1111/1365-2656.12445	Research_article	Greg_P_A_Lamarre	1	7	Journal_of_Animal_Ecology	85	2016	male	Université Antilles‐Guyane, UMR Ecologie des Forêts de Guyane, 97310 Kourou, French Guiana	French_Guiana	South_America	4.554	sb	0	-5		sb
CCS459	Cold‐seeking_behaviour_mitigates_reproductive_losses_from_fungal_infection_in_Drosophila	https://doi.org/10.1111/1365-2656.12438	Research_article	Vicky_L_Hunt	1	7	Journal_of_Animal_Ecology	85	2016	female	Milner Centre for Evolution and Department of Biology and Biochemistry, University of Bath, Claverton Down, Bath, BA2 7AY UK	UK	Europe	4.554	sb	0	-5		sb
CCS459	Cold‐seeking_behaviour_mitigates_reproductive_losses_from_fungal_infection_in_Drosophila	https://doi.org/10.1111/1365-2656.12438	Research_article	Nicholas_K_Priest	2	7	Journal_of_Animal_Ecology	85	2016	male	University of Bath, Claverton Down, Bath, BA2 7AY UK	UK	Europe	4.554	sb	0	-5		sb
CCS456	Reefscapes_of_fear:_predation_risk_and_reef_hetero‐geneity_interact_to_shape_herbivore_foraging_behaviour	https://doi.org/10.1111/1365-2656.12440	Research_article	Laura_B_Catano	1	7	Journal_of_Animal_Ecology	85	2016	female	Department of Biological Sciences, Florida International University, Marine Sciences Building, 3000 NE 151st Street, North Miami, FL 33181, USA	USA	North_America	4.554	sb	0	-5		sb
CCS456	Reefscapes_of_fear:_predation_risk_and_reef_hetero‐geneity_interact_to_shape_herbivore_foraging_behaviour	https://doi.org/10.1111/1365-2656.12440	Research_article	Deron_E_Burkepile	2	7	Journal_of_Animal_Ecology	85	2016	male	Florida International University, Marine Sciences Building, 3000 NE 151st Street, North Miami, FL 33181, USA	USA	North_America	4.554	sb	0	-5		sb
CCS463	Taxonomic_and_functional_composition_of_arthropod_assemblages_across_contrasting_Amazonian_forests	https://doi.org/10.1111/1365-2656.12445	Research_article	Christopher_Baraloto	2	7	Journal_of_Animal_Ecology	85	2016	male	International Center for Tropical Botany, Department of Biological Sciences, International Center for Tropical Botany, Florida International University, Miami, FL, 33199 USA	USA	North_America	4.554	sb	0	-5		sb
CCS476	Let's_stay_together?_Intrinsic_and_extrinsic_factors_involved_in_pair_bond_dissolution_in_a_recolonizing_wolf_population	https://doi.org/10.1111/1365-2656.12587	Research_article	Cyril_Milleret	1	7	Journal_of_Animal_Ecology	86	2017	male	Faculty of Applied Ecology and Agricultural Sciences, Hedmark University of Applied Sciences, Evenstad, N‐2480 Koppang, Norway	Norway	Europe	4.554	sb	1	-4		sb
CCS476	Let's_stay_together?_Intrinsic_and_extrinsic_factors_involved_in_pair_bond_dissolution_in_a_recolonizing_wolf_population	https://doi.org/10.1111/1365-2656.12587	Research_article	Håkan_Sand	2	7	Journal_of_Animal_Ecology	86	2017	male	Grimsö Wildlife Research Station, Department of Ecology, Swedish University of Agricultural Sciences, SE‐730 91 Riddarhyttan, Sweden	Sweden	Europe	4.554	sb	1	-4		sb
CCS494	Allee_effects_in_social_species	https://doi.org/10.1111/1365-2656.12759	Review	Franck_Courchamp	2	7	Journal_of_Animal_Ecology	87	2018	male	Ecologie Systématique Evolution, CNRS, Univ. Paris‐Sud, AgroParisTech, Université Paris‐Saclay, Orsay, France	France	Europe	4.554	sb	2	-3		sb
CCS494	Allee_effects_in_social_species	https://doi.org/10.1111/1365-2656.12759	Review	Elena_Angulo	1	7	Journal_of_Animal_Ecology	87	2018	female	Estación Biológica de Doñana, CSIC, Sevilla, Spain	Spain	Europe	4.554	sb	2	-3		sb
CCS514	Ants_are_the_major_agents_of_resource_removal_from_tropical_rainforests	https://doi.org/10.1111/1365-2656.12728	Research_article	Catherine_L_Parr	2	7	Journal_of_Animal_Ecology	87	2018	female	School of Environmental Sciences, University of Liverpool, Liverpool, UK	UK	Europe	4.554	sb	2	-3		sb
CCS514	Ants_are_the_major_agents_of_resource_removal_from_tropical_rainforests	https://doi.org/10.1111/1365-2656.12728	Research_article	Hannah_M_Griffiths	1	7	Journal_of_Animal_Ecology	87	2018	female	School of Environmental Sciences, University of Liverpool, Liverpool, UK	UK	Europe	4.554	sb	2	-3		sb
CCS524	Zebra_diel_migrations_reduce_encounter_risk_with_lions_at_night	https://doi.org/10.1111/1365-2656.12910	Research_article	Nicolas_Courbin	1	7	Journal_of_Animal_Ecology	88	2019	male	Terrestrial Ecology Unit, Department of Biology, Ghent University, Gent, Belgium	Belgium	Europe	4.554	sb	3	-2		sb
CCS522	Individual_variation,_population‐specific_behaviours_and_stochastic_processes_shape_marine_migration_phenologies	https://doi.org/10.1111/1365-2656.12852	Research_article	Cameron_Freshwater	1	7	Journal_of_Animal_Ecology	88	2019	male	Department of Biology, University of Victoria, Victoria, British Columbia, Canada	Canada	North_America	4.554	sb	3	-2		sb
CCS522	Individual_variation,_population‐specific_behaviours_and_stochastic_processes_shape_marine_migration_phenologies	https://doi.org/10.1111/1365-2656.12852	Research_article	Francis_Juanes	2	7	Journal_of_Animal_Ecology	88	2019	male	Department of Biology, University of Victoria, Victoria, British Columbia, Canada	Canada	North_America	4.554	sb	3	-2		sb
CCS524	Zebra_diel_migrations_reduce_encounter_risk_with_lions_at_night	https://doi.org/10.1111/1365-2656.12910	Research_article	Simon_Chamaillé‐Jammes	2	7	Journal_of_Animal_Ecology	88	2019	male	CEFE, CNRS, Univ. Montpellier, Univ. Paul Valéry Montpellier 3, EPHE, IRD, Montpellier, France	France	Europe	4.554	sb	3	-2		sb
CCS542	Weak_spatiotemporal_response_of_prey_to_predation_risk_in_a_freely_interacting_system	https://doi.org/10.1111/1365-2656.12968	Research_article	Jeremy_J_Cusack	1	7	Journal_of_Animal_Ecology	89	2020	male	Department of Zoology, University of Oxford, Oxford, UK	UK	Europe	4.554	sb	4	-1		sb
CCS542	Weak_spatiotemporal_response_of_prey_to_predation_risk_in_a_freely_interacting_system	https://doi.org/10.1111/1365-2656.12968	Research_article	Daniel_R_MacNulty	2	7	Journal_of_Animal_Ecology	89	2020	male	Department of Wildland Resources and Ecology Center, Utah State University, Logan, Utah	USA	North_America	4.554	sb	4	-1		sb
LFLL368	Supporting_local_diversity_of_habitats_and_species_on_farmland:_a_comparison_of_three_wildlife‐friendly_schemes	https://doi.org/10.1111/1365-2664.12557	Research_article	Chloe_J_Hardman	1	7	Journal_of_Applied_Ecology	53	2016	female	University_of_Reading	UK	Europe	5,84	sb	0	-5		sb
LFLL368	Supporting_local_diversity_of_habitats_and_species_on_farmland:_a_comparison_of_three_wildlife‐friendly_schemes	https://doi.org/10.1111/1365-2664.12557	Research_article	Ken_Norris	2	7	Journal_of_Applied_Ecology	53	2016	male	Zoological_Society_of_London	UK	Europe	5,84	sb	0	-5		sb
LFLL385	Mixed_policies_give_more_options_in_multifunctional_tropical_forest_landscapes	https://doi.org/10.1111/1365-2664.12666	Review	Elizabeth_A_Law	1	7	Journal_of_Applied_Ecology	54	2017	female	University_of_Queensland	Australia	Oceania	5,84	sb	1	-4		sb
LFLL385	Mixed_policies_give_more_options_in_multifunctional_tropical_forest_landscapes	https://doi.org/10.1111/1365-2664.12666	Review	Kerrie_A_Wilson	2	7	Journal_of_Applied_Ecology	54	2017	female	University_of_Queensland	Australia	Oceania	5,84	sb	1	-4		sb
LFLL386	Optimizing_management_to_enhance_multifunctionality_in_a_boreal_forest_landscape	https://doi.org/10.1111/1365-2664.12790	Review	María_Triviño	1	7	Journal_of_Applied_Ecology	54	2017	female	University_of_Jyväskylä	Finland	Europe	5,84	sb	1	-4		sb
LFLL386	Optimizing_management_to_enhance_multifunctionality_in_a_boreal_forest_landscape	https://doi.org/10.1111/1365-2664.12790	Review	Mikko_Mönkkönen	2	7	Journal_of_Applied_Ecology	54	2017	male	University_of_Jyväskylä	Finland	Europe	5,84	sb	1	-4		sb
LFLL388	Disentangling_relationships_between_plant_diversity_and_decomposition_processes_under_forest_restoration	https://doi.org/10.1111/1365-2664.12733	Review	Saori_Fujii	1	7	Journal_of_Applied_Ecology	54	2017	female	Yokohama_National_University	Japan	Asia	5,84	sb	1	-4		sb
LFLL397	Enhanced_yeast_feeding_following_mating_facilitates_control_of_the_invasive_fruit_pest_Drosophila_suzukii	https://doi.org/10.1111/1365-2664.12688	Research_article	Boyd_A_Mori	1	7	Journal_of_Applied_Ecology	54	2017	male	Swedish_University_of_Agricultural_Sciences	Sweden	Europe	5,84	sb	1	-4		sb
LFLL397	Enhanced_yeast_feeding_following_mating_facilitates_control_of_the_invasive_fruit_pest_Drosophila_suzukii	https://doi.org/10.1111/1365-2664.12688	Research_article	Paul_G_Becher	2	7	Journal_of_Applied_Ecology	54	2017	male	Swedish_University_of_Agricultural_Sciences	Sweden	Europe	5,84	sb	1	-4		sb
LFLL390	Evolution_of_plant_materials_for_ecological_restoration:_insights_from_the_applied_and_basic_literature	https://doi.org/10.1111/1365-2664.12739	Review	Erin_K_Espeland	1	7	Journal_of_Applied_Ecology	54	2017	female	USDA_ARS_Pest_Management_Research_Unit	USA	North_America	5,84	sb	1	-4		sb
LFLL390	Evolution_of_plant_materials_for_ecological_restoration:_insights_from_the_applied_and_basic_literature	https://doi.org/10.1111/1365-2664.12739	Review	Julie_E_Etterson	2	7	Journal_of_Applied_Ecology	54	2017	female	University_of_Minnesota	USA	North_America	5,84	sb	1	-4		sb
LFLL388	Disentangling_relationships_between_plant_diversity_and_decomposition_processes_under_forest_restoration	https://doi.org/10.1111/1365-2664.12733	Review	Forest_Isbell	2	7	Journal_of_Applied_Ecology	54	2017	male	University_of_Minnesota	USA	North_America	5,84	sb	1	-4		sb
LFLL425	Are_ranger_patrols_effective_in_reducing_poaching‐related_threats_within_protected_areas?	https://doi.org/10.1111/1365-2664.12965	Research_article	Jennifer_F_Moore	1	7	Journal_of_Applied_Ecology	55	2018	female	University_of_Florida	USA	North_America	5,84	sb	2	-3		sb
LFLL425	Are_ranger_patrols_effective_in_reducing_poaching‐related_threats_within_protected_areas?	https://doi.org/10.1111/1365-2664.12965	Research_article	Madan_K_Oli	2	7	Journal_of_Applied_Ecology	55	2018	male	University_of_Florida	USA	North_America	5,84	sb	2	-3		sb
LFLL468	Towards_grizzly_bear_population_recovery_in_a_modern_landscape	https://doi.org/10.1111/1365-2664.13259	Practitioner's_Perspective	Scott_E_Nielsen	2	7	Journal_of_Applied_Ecology	56	2019	male	University_of_Alberta	Canada	North_America	5,84	sb	3	-2		sb
LFLL468	Towards_grizzly_bear_population_recovery_in_a_modern_landscape	https://doi.org/10.1111/1365-2664.13259	Practitioner's_Perspective	Sean_CP_Coogan	1	7	Journal_of_Applied_Ecology	56	2019	male	University_of_Alberta	Canada	North_America	5,84	sb	3	-2		sb
LFLL480	Advancing_restoration_ecology:_A_new_approach_to_predict_time_to_recovery	https://doi.org/10.1111/1365-2664.13254	Review	Jan_Sulavik	2	7	Journal_of_Applied_Ecology	56	2019	male	Western_Norway_University_of_Applied_Sciences	Norway	Europe	5,84	sb	3	-2		sb
LFLL480	Advancing_restoration_ecology:_A_new_approach_to_predict_time_to_recovery	https://doi.org/10.1111/1365-2664.13254	Review	Knut_Rydgren	1	7	Journal_of_Applied_Ecology	56	2019	male	Western_Norway_University_of_Applied_Sciences	Norway	Europe	5,84	sb	3	-2		sb
LFLL491	Emerging_risks_of_non‐native_species_escapes_from_aquaculture:_Call_for_policy_improvements_in_China_and_other_developing_countries	https://doi.org/10.1111/1365-2664.13521	Policy_Direction	Rui-Ting_Ju	1	7	Journal_of_Applied_Ecology	57	2020	female	Fudan_University	China	Asia	5,84	sb	4	-1		sb
LFLL491	Emerging_risks_of_non‐native_species_escapes_from_aquaculture:_Call_for_policy_improvements_in_China_and_other_developing_countries	https://doi.org/10.1111/1365-2664.13521	Policy_Direction	Bo_Li	2	7	Journal_of_Applied_Ecology	57	2020	male	Fudan_University	China	Asia	5,84	sb	4	-1		sb
MBS295	Spatial_autocorrelation_analysis_and_ecological_niche_modelling_allows_inference_of_range_dynamics_driving_the_population_genetic_structure_of_a_Neotropical_savanna_tree	https://doi.org/10.1111/jbi.12622	Original_article	Mariana_P_C_Telles	2	7	Journal_of_Biogeography	43	2016	female	Universidade_Federal_de_Goiás	Brazil	South_America	3.723	sb	0	-5		sb
MBS295	Spatial_autocorrelation_analysis_and_ecological_niche_modelling_allows_inference_of_range_dynamics_driving_the_population_genetic_structure_of_a_Neotropical_savanna_tree	https://doi.org/10.1111/jbi.12622	Original_article	José_Alexandre_F_Diniz‐Filho	1	7	Journal_of_Biogeography	43	2016	male	Universidade_Federal_de_Goiás	Brazil	South_America	3.723	sb	0	-5		sb
MBS284	Evolutionary_history_of_the_subnival_flora_of_the_Himalaya‐Hengduan_Mountains:_first_insights_from_comparative_phylogeography_of_four_perennial_herbs	https://doi.org/10.1111/jbi.12610	Original_article	Dong_Luo	1	7	Journal_of_Biogeography	43	2016	male	Chinese_Academy_of_Sciences	China	Asia	3.723	sb	0	-5		sb
MBS284	Evolutionary_history_of_the_subnival_flora_of_the_Himalaya‐Hengduan_Mountains:_first_insights_from_comparative_phylogeography_of_four_perennial_herbs	https://doi.org/10.1111/jbi.12610	Original_article	Hang_Sun	2	7	Journal_of_Biogeography	43	2016	male	Chinese_Academy_of_Sciences	China	Asia	3.723	sb	0	-5		sb
MBS292	Climatic_niche_attributes_and_diversification_in_Anolis_lizards	https://doi.org/10.1111/jbi.12627	Original_article	Juan_M_Daza	2	7	Journal_of_Biogeography	43	2016	male	Universidad_de_Antioquia	Colombia	South_America	3.723	sb	0	-5		sb
MBS292	Climatic_niche_attributes_and_diversification_in_Anolis_lizards	https://doi.org/10.1111/jbi.12627	Original_article	Julián_A_Velasco	1	7	Journal_of_Biogeography	43	2016	male	Universidad_Nacional_Autónoma_de_México	Mexico	Central_America	3.723	sb	0	-5		sb
MBS294	A_novel_phylogenetic_regionalization_of_phytogeographical_zones_of_southern_Africa_reveals_their_hidden_evolutionary_affinities	https://doi.org/10.1111/jbi.12619	Original_article	Barnabas_H_Daru	1	7	Journal_of_Biogeography	43	2016	male	University_of_Johannesburg	South_Africa	Africa	3.723	sb	0	-5		sb
MBS294	A_novel_phylogenetic_regionalization_of_phytogeographical_zones_of_southern_Africa_reveals_their_hidden_evolutionary_affinities	https://doi.org/10.1111/jbi.12619	Original_article	T_Jonathan_Davies	2	7	Journal_of_Biogeography	43	2016	male	University_of_Johannesburg	South_Africa	Africa	3.723	sb	0	-5		sb
MBS303	Ecological_niche_modelling_and_coalescent_simulations_to_explore_the_recent_geographical_range_history_of_five_widespread_bumblebee_species_in_Europe	https://doi.org/10.1111/jbi.12748	Original_article	Simon_Dellicour	1	7	Journal_of_Biogeography	44	2017	male	University_of_Leuven	Belgium	Europe	3.723	sb	1	-4		sb
MBS303	Ecological_niche_modelling_and_coalescent_simulations_to_explore_the_recent_geographical_range_history_of_five_widespread_bumblebee_species_in_Europe	https://doi.org/10.1111/jbi.12748	Original_article	Thomas_Lecocq	2	7	Journal_of_Biogeography	44	2017	male	University_of_Mons	Belgium	Europe	3.723	sb	1	-4		sb
MBS319	Oceanic_currents_drove_population_genetic_connectivity_of_the_brown_alga_Sargassum_thunbergii_in_the_north‐west_Pacific	https://doi.org/10.1111/jbi.12856	Original_article	Jing‐Jing_Li	1	7	Journal_of_Biogeography	44	2017	female	Chinese_Academy_of_Sciences	China	Asia	3.723	sb	1	-4		sb
MBS319	Oceanic_currents_drove_population_genetic_connectivity_of_the_brown_alga_Sargassum_thunbergii_in_the_north‐west_Pacific	https://doi.org/10.1111/jbi.12856	Original_article	Hikaru_Endo	2	7	Journal_of_Biogeography	44	2017	male	Tohoku_University	Japan	Asia	3.723	sb	1	-4		sb
MBS322	Historical_biogeography_of_the_palaeoendemic_toad_genus_Oreophrynella_(Amphibia:_Bufonidae)_sheds_a_new_light_on_the_origin_of_the_Pantepui_endemic_terrestrial_biota	https://doi.org/10.1111/jbi.13093	Original_article	Philippe_J_R_Kok	1	7	Journal_of_Biogeography	45	2018	male	Vrije_Universiteit_Brussel	Belgium	Europe	3.723	sb	2	-3		sb
MBS328	Contrasting_phylogeography_of_two_Western_Palaearctic_fish_parasites_despite_similar_life_cycles	https://doi.org/10.1111/jbi.13118	Original_article	Christelle_Tougard	2	7	Journal_of_Biogeography	45	2018	female	Université_de_Montpellier	France	Europe	3.723	sb	2	-3		sb
MBS328	Contrasting_phylogeography_of_two_Western_Palaearctic_fish_parasites_despite_similar_life_cycles	https://doi.org/10.1111/jbi.13118	Original_article	Marie‐Jeanne_Perrot‐Minnot	1	7	Journal_of_Biogeography	45	2018	female	University_of_Bourgogne_Franche‐Comté	France	Europe	3.723	sb	2	-3		sb
MBS322	Historical_biogeography_of_the_palaeoendemic_toad_genus_Oreophrynella_(Amphibia:_Bufonidae)_sheds_a_new_light_on_the_origin_of_the_Pantepui_endemic_terrestrial_biota	https://doi.org/10.1111/jbi.13093	Original_article	D_Bruce_Means	2	7	Journal_of_Biogeography	45	2018	male	Coastal_Plains_Institute_and_Land_Conservancy	USA	North_America	3.723	sb	2	-3		sb
MBS345	Two_speed_invasion:_assisted_and_intrinsic_dispersal_of_common_mynas_over_150_years_of_colonization	https://doi.org/10.1111/jbi.13473	Original_article	Kyle_M_Ewart	1	7	Journal_of_Biogeography	46	2019	male	Australian_Museum	Australia	Oceania	3.723	sb	3	-2		sb
MBS345	Two_speed_invasion:_assisted_and_intrinsic_dispersal_of_common_mynas_over_150_years_of_colonization	https://doi.org/10.1111/jbi.13473	Original_article	Richard_E_Major	2	7	Journal_of_Biogeography	46	2019	male	Australian_Museum	Australia	Oceania	3.723	sb	3	-2		sb
MBS358	Pre‐Pleistocene_origin_of_phylogeographical_breaks_in_African_rain_forest_trees:_New_insights_from_Greenwayodendron_(Annonaceae)_phylogenomics	https://doi.org/10.1111/jbi.13476	Original_article	Jérémy_Migliore	1	7	Journal_of_Biogeography	46	2019	male	Université_Libre_de_Bruxelles	Belgium	Europe	3.723	sb	3	-2		sb
MBS358	Pre‐Pleistocene_origin_of_phylogeographical_breaks_in_African_rain_forest_trees:_New_insights_from_Greenwayodendron_(Annonaceae)_phylogenomics	https://doi.org/10.1111/jbi.13476	Original_article	Olivier_J_Hardy	2	7	Journal_of_Biogeography	46	2019	male	Université_Libre_de_Bruxelles	Belgium	Europe	3.723	sb	3	-2		sb
MBS357	Evolving_in_isolation:_Genetic_tests_reject_recent_connections_of_Amazonian_savannas_with_the_central_Cerrado	https://doi.org/10.1111/jbi.13468	Original_article	Luciana_C_Resende‐Moreira	1	7	Journal_of_Biogeography	46	2019	female	Universidade_Federal_de_Minas_Gerais	Brazil	South_America	3.723	sb	3	-2		sb
MBS357	Evolving_in_isolation:_Genetic_tests_reject_recent_connections_of_Amazonian_savannas_with_the_central_Cerrado	https://doi.org/10.1111/jbi.13468	Original_article	Maria_Bernadete_Lovato	2	7	Journal_of_Biogeography	46	2019	female	Universidade_Federal_de_Minas_Gerais	Brazil	South_America	3.723	sb	3	-2		sb
MBS359	Evolutionary_and_demographic_correlates_of_Pleistocene_coastline_changes_in_the_Sicilian_wall_lizard_Podarcis_wagleriana	https://doi.org/10.1111/jbi.13479	Original_article	Gabriele_Senczuk	1	7	Journal_of_Biogeography	46	2019	female	La_Sapienza_University_of_Rome	Italy	Europe	3.723	sb	3	-2		sb
MBS359	Evolutionary_and_demographic_correlates_of_Pleistocene_coastline_changes_in_the_Sicilian_wall_lizard_Podarcis_wagleriana	https://doi.org/10.1111/jbi.13479	Original_article	Daniele_Salvi	2	7	Journal_of_Biogeography	46	2019	female	Universidade_do_Porto	Portugal	Europe	3.723	sb	3	-2		sb
MBS342	The_coastal_North_Pacific:_Origins_and_history_of_a_dominant_marine_biota	https://doi.org/10.1111/jbi.13471	Original_article	Barbara_E_Wortham	2	7	Journal_of_Biogeography	46	2019	female	University_of_California	USA	North_America	3.723	sb	3	-2		sb
MBS342	The_coastal_North_Pacific:_Origins_and_history_of_a_dominant_marine_biota	https://doi.org/10.1111/jbi.13471	Original_article	Geerat_J_Vermeij	1	7	Journal_of_Biogeography	46	2019	male	University_of_California	USA	North_America	3.723	sb	3	-2		sb
MBS382	Functional_traits_explain_amphibian_distribution_in_the_Brazilian_Atlantic_Forest	https://doi.org/10.1111/jbi.13727	Original_article	Ricardo_Lourenço‐de‐Moraes	1	7	Journal_of_Biogeography	47	2020	male	Universidade_Federal_da_Paraíba	Brazil	South_America	3.723	sb	4	-1		sb
MBS382	Functional_traits_explain_amphibian_distribution_in_the_Brazilian_Atlantic_Forest	https://doi.org/10.1111/jbi.13727	Original_article	Rogério_P_Bastos	2	7	Journal_of_Biogeography	47	2020	male	Universidade_Federal_de_Goiás	Brazil	South_America	3.723	sb	4	-1		sb
MBS371	Model_complexity_affects_species_distribution_projections_under_climate_change	https://doi.org/10.1111/jbi.13734	Original_article	Niklaus_E_Zimmermann	2	7	Journal_of_Biogeography	47	2020	male	Swiss_Federal_Research_Institute	Switzerland	Europe	3.723	sb	4	-1		sb
MBS371	Model_complexity_affects_species_distribution_projections_under_climate_change	https://doi.org/10.1111/jbi.13734	Original_article	Philipp_Brun	1	7	Journal_of_Biogeography	47	2020	male	Swiss_Federal_Research_Institute	Switzerland	Europe	3.723	sb	4	-1		sb
CCS	How do species barriers decay? Concordance and local introgression in mosaic hybrid zones of mussels	/doi/10.1111/jeb.13709	Special_issue	Alexis Simon	1	7	Journal_of_evolutionary_biology	34	2021	male	ISEM, Univ Montpellier, CNRS, EPHE, IRD, Montpellier, France	France	cont	2.541	db	3		pos	db
CCS	How do species barriers decay? Concordance and local introgression in mosaic hybrid zones of mussels	/doi/10.1111/jeb.13709	Special_issue	Nicolas Bierne	2	7	Journal_of_evolutionary_biology	34	2021	male	ISEM, Univ Montpellier, CNRS, EPHE, IRD, Montpellier, France	France	cont	2.541	db	3		pos	db
CCS	Genetic and morphological divergence between Littorina fabalis ecotypes in Northern Europe	/doi/10.1111/jeb.13705	Special_issue	Rui Faria	2	7	Journal_of_evolutionary_biology	34	2021	male	CIBIO, Centro de Investigação em Biodiversidade e Recursos Genéticos, InBIO, Laboratório Associado, Universidade do Porto, Vairão, Portugal	Portugal	cont	2.541	db	3		pos	db
CCS	Genetic and morphological divergence between Littorina fabalis ecotypes in Northern Europe	/doi/10.1111/jeb.13705	Special_issue	Juan Galindo	1	7	Journal_of_evolutionary_biology	34	2021	male	Department of Biochemistry, Genetics and Immunology, Universidade de Vigo, Vigo, Spain	Spain	cont	2.541	db	3		pos	db
CCS	Recombination, chromosome number and eusociality in the Hymenoptera	/doi/10.1111/jeb.12543	Research Paper	Laura Ross	1	7	Journal_of_evolutionary_biology	28	2015	female	School of Biological Sciences, Institute of Evolutionary Biology, University of Edinburgh	UK	Europe	2.541	db	-1		pre	sb
CCS	Ecological divergence and speciation in common bottlenose dolphins in the western South Atlantic	/doi/10.1111/jeb.13575	Special_issue	Ana P. B. Costa	1	7	Journal_of_evolutionary_biology	34	2021	female	Department of Biology, University of Louisiana at Lafayette, Lafayette, LA, USA	USA	cont	2.541	db	3		pos	db
CCS	Ecological divergence and speciation in common bottlenose dolphins in the western South Atlantic	/doi/10.1111/jeb.13575	Special_issue	Patricia E. Rosel	2	7	Journal_of_evolutionary_biology	34	2021	female	National Marine Fisheries Service, Southeast Fisheries Science Center, Lafayette, LA, USA	USA	cont	2.541	db	3		pos	db
LFLL	Fitness consequences of social network position in a wild population of forked fungus beetles (Bolitotherus cornutus)	/doi/10.1111/j.1420-9101.2011.02411.x	Research_paper	Vincent A. Formica	1	7	Journal_of_evolutionary_biology	25	2012	male	Mountain Lake Biological Station, Department of Biology, University of Virginia, Charlottesville, VA, USA	USA	North_America	3	db	-4		pre	sb
LFLL	Fitness consequences of social network position in a wild population of forked fungus beetles (Bolitotherus cornutus)	/doi/10.1111/j.1420-9101.2011.02411.x	Research_paper	Edmund D. Brodie III	2	7	Journal_of_evolutionary_biology	25	2012	male	Mountain Lake Biological Station, Department of Biology, University of Virginia, Charlottesville, VA, USA	USA	North_America	3	db	-4		pre	sb
CCS	Recombination, chromosome number and eusociality in the Hymenoptera	/doi/10.1111/jeb.12543	Research Paper	Nate B Hardy	2	7	Journal_of_evolutionary_biology	28	2015	male	Department of Entomology and Plant Pathology, Auburn University, Auburn, AL, USA	USA	North_America	2.541	db	-1		pre	sb
MBS06	Fatty_acid_biomarkers_to_verify_cyanobacteria_feeding_abilities_of_herbivorous_consumers	https://doi.org/10.1080/02705060.2015.1025304	Article	Dongwoo_Yang	1	7	Journal_of_Freshwater_Ecology	31	2016	male	Ajou_University	South_Korea	Asia	1.239	sb	0	-5		sb
MBS06	Fatty_acid_biomarkers_to_verify_cyanobacteria_feeding_abilities_of_herbivorous_consumers	https://doi.org/10.1080/02705060.2015.1025304	Article	Sangkyu_Park	2	7	Journal_of_Freshwater_Ecology	31	2016	male	Ajou_University	South_Korea	Asia	1.239	sb	0	-5		sb
MBS19	Application_of_dual_stable_isotopes_in_investigating_the_utilization_of_two_wild_dominant_filamentous_algae_as_food_sources_for_Daphnia_magna	https://doi.org/10.1080/02705060.2017.1298537	Original_article	Hong_Fu	1	7	Journal_of_Freshwater_Ecology	32	2017	male	Chinese_Academy_of_Sciences	China	Asia	1.239	sb	1	-4		sb
MBS19	Application_of_dual_stable_isotopes_in_investigating_the_utilization_of_two_wild_dominant_filamentous_algae_as_food_sources_for_Daphnia_magna	https://doi.org/10.1080/02705060.2017.1298537	Original_article	Zhenbin_Wu	2	7	Journal_of_Freshwater_Ecology	32	2017	male	Chinese_Academy_of_Sciences	China	Asia	1.239	sb	1	-4		sb
MBS25	Patterns_of_larval_fish_assemblages_along_the_direction_of_freshwater_input_within_the_southern_branch_of_the_Yangtze_Estuary,_China:_implications_for_conservation	https://doi.org/10.1080/02705060.2018.1426503	Article	Lei_Gao	1	7	Journal_of_Freshwater_Ecology	33	2018	male	Chinese_Academy_of_Sciences	China	Asia	1.239	sb	2	-3		sb
MBS25	Patterns_of_larval_fish_assemblages_along_the_direction_of_freshwater_input_within_the_southern_branch_of_the_Yangtze_Estuary,_China:_implications_for_conservation	https://doi.org/10.1080/02705060.2018.1426503	Article	Songguang_Xie	2	7	Journal_of_Freshwater_Ecology	33	2018	male	Chinese_Academy_of_Sciences	China	Asia	1.239	sb	2	-3		sb
MBS32	A_comparison_of_the_growth_and_photosynthetic_response_of_Vallisneria_natans_(Lour.)_Hara_to_a_long-term_water_depth_gradient_under_flowing_and_static_water	https://doi.org/10.1080/02705060.2018.1432509	Article	Hua_Wei	1	7	Journal_of_Freshwater_Ecology	33	2018	male	Chinese_Academy_of_Sciences	China	Asia	1.239	sb	2	-3		sb
MBS32	A_comparison_of_the_growth_and_photosynthetic_response_of_Vallisneria_natans_(Lour.)_Hara_to_a_long-term_water_depth_gradient_under_flowing_and_static_water	https://doi.org/10.1080/02705060.2018.1432509	Article	Zhenbin_Wu	2	7	Journal_of_Freshwater_Ecology	33	2018	male	Chinese_Academy_of_Sciences	China	Asia	1.239	sb	2	-3		sb
MBS22	Water_quality_improvement_through_the_interaction_of_biotic_and_abiotic_variables_within_the_rhizospheric_zone_of_an_artificial_floating_vegetation_island	https://doi.org/10.1080/02705060.2017.1422559	Article	Hae-Jin_Lee	2	7	Journal_of_Freshwater_Ecology	33	2018	male	National_Institute_of_Environmental_Research	South_Korea	Asia	1.239	sb	2	-3		sb
MBS22	Water_quality_improvement_through_the_interaction_of_biotic_and_abiotic_variables_within_the_rhizospheric_zone_of_an_artificial_floating_vegetation_island	https://doi.org/10.1080/02705060.2017.1422559	Article	Hae-Kyung_Park	1	7	Journal_of_Freshwater_Ecology	33	2018	male	National_Institute_of_Environmental_Research	South_Korea	Asia	1.239	sb	2	-3		sb
MBS33	Response_of_Taxodium_distichum_to_winter_submergence_in_the_water-level-fluctuating_zone_of_the_Three_Gorges_Reservoir_region	https://doi.org/10.1080/02705060.2018.1470041	Original_article	Ting_Wang	1	7	Journal_of_Freshwater_Ecology	34	2019	female	Southwest_University	China	Asia	1.239	sb	3	-2		sb
MBS39	Bellamya_aeruginosa_(Reeve)_promote_the_growth_of_Elodea_nuttallii_(Planch.)_H._St_John_in_high_nutrient_environment	https://doi.org/10.1080/02705060.2018.1549597	Original_article	Huijun_Ding	2	7	Journal_of_Freshwater_Ecology	34	2019	female	Jiangxi_Institute_of_Water_Sciences	China	Asia	1.239	sb	3	-2		sb
MBS53	Monitoring_the_genetic_effects_of_broodstock_enhancement_of_silver_carp_(Hypophthalmichthys_molitrix)_in_middle_Yangtze_River_based_on_cytb_gene_and_D-loop_sequences	https://doi.org/10.1080/02705060.2019.1588795	Original_article	Huijuan_Chen	1	7	Journal_of_Freshwater_Ecology	34	2019	female	Southwest_University	China	Asia	1.239	sb	3	-2		sb
MBS53	Monitoring_the_genetic_effects_of_broodstock_enhancement_of_silver_carp_(Hypophthalmichthys_molitrix)_in_middle_Yangtze_River_based_on_cytb_gene_and_D-loop_sequences	https://doi.org/10.1080/02705060.2019.1588795	Original_article	Yun_Li	2	7	Journal_of_Freshwater_Ecology	34	2019	female	Southwest_University	China	Asia	1.239	sb	3	-2		sb
MBS33	Response_of_Taxodium_distichum_to_winter_submergence_in_the_water-level-fluctuating_zone_of_the_Three_Gorges_Reservoir_region	https://doi.org/10.1080/02705060.2018.1470041	Original_article	Shuai_Li	2	7	Journal_of_Freshwater_Ecology	34	2019	male	Southwest_University	China	Asia	1.239	sb	3	-2		sb
MBS38	Seasonal_dynamics_of_zooplankton_functional_group_and_its_relationship_with_physico-chemical_variables_in_high_turbid_nutrient-rich_Small_Xingkai_Wetland_Lake,_Northeast_China	https://doi.org/10.1080/02705060.2018.1443847	Original_article	Chengxue_Ma	1	7	Journal_of_Freshwater_Ecology	34	2019	male	Northeast_Forestry_University	China	Asia	1.239	sb	3	-2		sb
MBS39	Bellamya_aeruginosa_(Reeve)_promote_the_growth_of_Elodea_nuttallii_(Planch.)_H._St_John_in_high_nutrient_environment	https://doi.org/10.1080/02705060.2018.1549597	Original_article	Wei_Li	1	7	Journal_of_Freshwater_Ecology	34	2019	male	Nanchang_Institute_of_Technology	China	Asia	1.239	sb	3	-2		sb
MBS40	Spatial_and_temporal_variation_of_phytoplankton_functional_groups_in_extremely_alkaline_Dali_Nur_Lake,_North_China	https://doi.org/10.1080/02705060.2018.1554545	Original_article	Chengxue_Ma	1	7	Journal_of_Freshwater_Ecology	34	2019	male	Northeast_Forestry_University	China	Asia	1.239	sb	3	-2		sb
MBS38	Seasonal_dynamics_of_zooplankton_functional_group_and_its_relationship_with_physico-chemical_variables_in_high_turbid_nutrient-rich_Small_Xingkai_Wetland_Lake,_Northeast_China	https://doi.org/10.1080/02705060.2018.1443847	Original_article	Khalid_Abdullah_Al-Ghanim	2	7	Journal_of_Freshwater_Ecology	34	2019	male	King_Saud_University	Saudi_Arabia	Asia	1.239	sb	3	-2		sb
MBS40	Spatial_and_temporal_variation_of_phytoplankton_functional_groups_in_extremely_alkaline_Dali_Nur_Lake,_North_China	https://doi.org/10.1080/02705060.2018.1554545	Original_article	Shahid_Mahboob	2	7	Journal_of_Freshwater_Ecology	34	2019	male	King_Saud_University	Saudi_Arabia	Asia	1.239	sb	3	-2		sb
MBS44	Correlational_patterns_of_species_diversity,_swimming_ability_and_ecological_tolerance_of_non-marine_ostracoda_(Crustacea)_with_different_reproductive_modes_in_shallow_water_bodies_of_ağrı_region_(Turkey)	https://doi.org/10.1080/02705060.2019.1576551	Original_article	Nurhayat_Dalkıran	2	7	Journal_of_Freshwater_Ecology	34	2019	female	Uludag_University	Turkey	Asia	1.239	sb	3	-2		sb
MBS44	Correlational_patterns_of_species_diversity,_swimming_ability_and_ecological_tolerance_of_non-marine_ostracoda_(Crustacea)_with_different_reproductive_modes_in_shallow_water_bodies_of_ağrı_region_(Turkey)	https://doi.org/10.1080/02705060.2019.1576551	Original_article	Okan_Külköylüoğlu	1	7	Journal_of_Freshwater_Ecology	34	2019	male	Abant_Izzet_Baysal_University	Turkey	Asia	1.239	sb	3	-2		sb
MBS62	Soil_carbon_dynamics_in_a_Pinus_massoniana_plantation_following_clear-cutting_and_slash_removal	https://doi.org/10.1093/jpe/rtv030	Research_article	Yuan_Wen	1	7	Journal_of_Plant_Ecology	9	2016	female	Beijing_Normal_University	China	Asia	1.833	sb	0	-5		sb
MBS60	Impacts_of_fire_severity_and_post-fire_reforestation_on_carbon_pools_in_boreal_larch_forests_in_Northeast_China	https://doi.org/10.1093/jpe/rtv036	Research_article	Jingyun_Fang	2	7	Journal_of_Plant_Ecology	9	2016	male	Peking_University	China	Asia	1.833	sb	0	-5		sb
MBS60	Impacts_of_fire_severity_and_post-fire_reforestation_on_carbon_pools_in_boreal_larch_forests_in_Northeast_China	https://doi.org/10.1093/jpe/rtv036	Research_article	Xueyang_Hu	1	7	Journal_of_Plant_Ecology	9	2016	male	Peking_University	China	Asia	1.833	sb	0	-5		sb
MBS62	Soil_carbon_dynamics_in_a_Pinus_massoniana_plantation_following_clear-cutting_and_slash_removal	https://doi.org/10.1093/jpe/rtv030	Research_article	Jingxin_Wang	2	7	Journal_of_Plant_Ecology	9	2016	male	West_Virginia_University	USA	North_America	1.833	sb	0	-5		sb
MBS76	Soil_respiration_is_driven_by_fine_root_biomass_along_a_forest_chronosequence_in_subtropical_China	https://doi.org/10.1093/jpe/rtw044	Research_article	Chao_Wang	1	7	Journal_of_Plant_Ecology	10	2017	male	Peking_University	China	Asia	1.833	sb	1	-4		sb
MBS76	Soil_respiration_is_driven_by_fine_root_biomass_along_a_forest_chronosequence_in_subtropical_China	https://doi.org/10.1093/jpe/rtw044	Research_article	Jin-Sheng_He	2	7	Journal_of_Plant_Ecology	10	2017	male	Peking_University	China	Asia	1.833	sb	1	-4		sb
MBS100	Understanding_plant_drought_resistance_in_a_Mediterranean_coastal_sand_dune_ecosystem:_differences_between_native_and_exotic_invasive_species	https://doi.org/10.1093/jpe/rtx014	Research_article	Cristina_Antunes	1	7	Journal_of_Plant_Ecology	11	2018	female	Universidade_de_Lisboa	Portugal	Europe	1.833	sb	2	-3		sb
MBS100	Understanding_plant_drought_resistance_in_a_Mediterranean_coastal_sand_dune_ecosystem:_differences_between_native_and_exotic_invasive_species	https://doi.org/10.1093/jpe/rtx014	Research_article	Cristina_Máguas	2	7	Journal_of_Plant_Ecology	11	2018	female	Universidade_de_Lisboa	Portugal	Europe	1.833	sb	2	-3		sb
MBS123	Environmental_landscape_determinants_of_maximum_forest_canopy_height_of_boreal_forests	https://doi.org/10.1093/jpe/rtx071	Research_article	Lingfeng_Mao	1	7	Journal_of_Plant_Ecology	12	2019	male	University_of_Alberta	Canada	North_America	1.833	sb	3	-2		sb
MBS123	Environmental_landscape_determinants_of_maximum_forest_canopy_height_of_boreal_forests	https://doi.org/10.1093/jpe/rtx071	Research_article	Scott_E_Nielsen	2	7	Journal_of_Plant_Ecology	12	2019	male	University_of_Alberta	Canada	North_America	1.833	sb	3	-2		sb
MBS118	Effects_of_salinity_and_clonal_integration_on_the_amphibious_plant_Paspalum_paspaloides:_growth,_photosynthesis_and_tissue_ion_regulation	https://doi.org/10.1093/jpe/rtx061	Research_article	Fei-Hai_Yu	2	7	Journal_of_Plant_Ecology	12	2019	male	Beijing_Forestry_University	China	Asia	1.833	sb	3	-2		sb
MBS118	Effects_of_salinity_and_clonal_integration_on_the_amphibious_plant_Paspalum_paspaloides:_growth,_photosynthesis_and_tissue_ion_regulation	https://doi.org/10.1093/jpe/rtx061	Research_article	Ya-Ping_Xing	1	7	Journal_of_Plant_Ecology	12	2019	male	Beijing_Forestry_University	China	Asia	1.833	sb	3	-2		sb
MBS144	Spatiotemporal_variation_in_leaf_size_and_shape_in_response_to_climate	https://doi.org/10.1093/jpe/rtz053	Research_article	Yaoqi_Li	1	7	Journal_of_Plant_Ecology	13	2020	female	Peking_University	China	Asia	1.833	sb	4	-1		sb
MBS144	Spatiotemporal_variation_in_leaf_size_and_shape_in_response_to_climate	https://doi.org/10.1093/jpe/rtz053	Research_article	Zhiheng_Wang	2	7	Journal_of_Plant_Ecology	13	2020	male	Peking_University	China	Asia	1.833	sb	4	-1		sb
CCS554	Monitoring_red_squirrels_Sciurus_vulgaris_and_grey_squirrels_Sciurus_carolinensis_in_Britain	https://doi.org/10.1046/j.0305-1838.2003.00028.x	Review	JOHN_GURNELL	1	7	Mammal_review	34	2004	male	School of Biological Sciences, Queen Mary, University of London	UK	Europe	2.804	db	-5	-5	pre	sb
CCS603	Habitat_heterogeneity_and_mammalian_predator–prey_interactions	https://doi.org/10.1111/j.1365-2907.2011.00189.x	Review	Lucrezia_GORINI	1	7	Mammal_review	42	2012	female	Hedmark University College, Department of Applied Ecology and Agricultural Sciences, Evenstad, NO‐2480 Koppang, Norway	Norway	Europe	2.804	db	1	3	pos	db
CCS603	Habitat_heterogeneity_and_mammalian_predator–prey_interactions	https://doi.org/10.1111/j.1365-2907.2011.00189.x	Review	Erlend_B_NILSEN	2	7	Mammal_review	42	2012	male	Norwegian Institute for Nature Research, Tungasletta – 2, NO‐7485 Trondheim Norway.	Norway	Europe	2.804	db	1	3	pos	db
CCS	Why Do Phytoplankton Evolve Large Size in Response to Grazing?	https://doi/10.1086/706251	Research_Paper	Pedro Branco	1	7	The_American_Naturalist	195	2020	male	Department of Freshwater and Marine Ecology, Institute for Biodiversity and Ecosystem Dynamics, University of Amsterdam	Amsterdam	Europe	2.541	db	3		pos	db
CCS	Why Do Phytoplankton Evolve Large Size in Response to Grazing?	https://doi/10.1086/706251	Research_Paper	Jef Huisman	2	7	The_American_Naturalist	193	2020	male	Department of Freshwater and Marine Ecology, Institute for Biodiversity and Ecosystem Dynamics, University of Amsterdam	Amsterdam	Europe	2.541	db	3		pos	db
AN285	Biophysical Modeling of Water Economy Can Explain Geographic Gradient of Body Size in Anurans	https://doi/10.1086/700833	Article	Sidney F. Gouveia	1	7	The_American_Naturalist	193	2019	male	Department of Ecology, Federal University of Sergipe, São Cristóvão, Sergipe	Brazil	South_America	2541	db	2		pos	db
AN286	Biophysical Modeling of Water Economy Can Explain Geographic Gradient of Body Size in Anurans	https://doi/10.1086/700833	Article	Pablo Ariel Martinez	2	7	The_American_Naturalist	193	2019	male	Department of Ecology, Federal University of Sergipe, São Cristóvão, Sergipe	Brazil	South_America	2541	db	2		pos	db
AN115	Evolution of Diadromy in Fish: Insights from a Tropical Genus (Kuhlia Species)	https://doi/10.1086/668593	Article	Pierre Feutry	1	7	The_American_Naturalist	181	2013	male	1. Muse´um National d’Histoire Naturelle, Milieux et Peuplements Aquatiques, Unite´ de Mixte de Recherche (UMR) 7208, Ichtyologie, 57 rue Cuvier, CP026, Paris 75231, France;	France	Europe	2541	db	-2		pre	sb
AN116	Evolution of Diadromy in Fish: Insights from a Tropical Genus (Kuhlia Species)	https://doi/10.1086/668593	Article	Philippe Keith	2	7	The_American_Naturalist	181	2013	male	1. Muse´um National d’Histoire Naturelle, Milieux et Peuplements Aquatiques, Unite´ de Mixte de Recherche (UMR) 7208, Ichtyologie, 57 rue Cuvier, CP026, Paris 75231, France;	France	Europe	2541	db	-2		pre	sb
AN140	Mutualistic Mimicry and Filtering by Altitude Shape the Structure of Andean Butterfly Communities	https://doi/10.1086/674100	Article	Marianne Elias	2	7	The_American_Naturalist	183	2014	female	Unité Mixte de Recherche 7205, CNRS/Muséum National d’Histoire Naturelle, Paris	France	Europe	2541	db	-1		pre	sb
AN139	Mutualistic Mimicry and Filtering by Altitude Shape the Structure of Andean Butterfly Communities	https://doi/10.1086/674100	Article	Nicolas Chazot	1	7	The_American_Naturalist	183	2014	male	Unité Mixte de Recherche 7205, CNRS/Muséum National d’Histoire Naturelle, Paris	France	Europe	2541	db	-1		pre	sb
AN239	Resist Globally, Infect Locally: A Transcontinental Test of Adaptation by Stickleback and Their Tapeworm Parasite	https://doi/10.1086/689597	Article	Jesse N. Weber	1	7	The_American_Naturalist	189	2017	male	1. Department of Integrative Biology, University of Texas, Austin, Texas 78712; 2. Department of Evolutionary Ecology, Max Planck Institute for Evolutionary Biology, August-Thienemann-Straße 2, 24306 Plön, Germany	Germany	Europe	2541	db	0		pos	db
AN240	Resist Globally, Infect Locally: A Transcontinental Test of Adaptation by Stickleback and Their Tapeworm Parasite	https://doi/10.1086/689597	Article	Daniel I. Bolnick	2	7	The_American_Naturalist	189	2017	male	1. Department of Integrative Biology, University of Texas, Austin, Texas 78712; 2. Department of Evolutionary Ecology, Max Planck Institute for Evolutionary Biology, August-Thienemann-Straße 2, 24306 Plön, Germany	Germany	Europe	2541	db	0		pos	db
AN296	Delayed Chemical Defense: Timely Expulsion of Herbivores Can Reduce Competition with Neighboring Plants	https://doi/10.1086/700577	Article	Pia Backmann	1	7	The_American_Naturalist	193	2019	female	German Centre for Integrative Biodiversity Research (iDiv) Halle-Jena-Leipzig, 04103 Leipzig	Germany	Europe	2541	db	2		pos	db
AN297	Delayed Chemical Defense: Timely Expulsion of Herbivores Can Reduce Competition with Neighboring Plants	https://doi/10.1086/700577	Article	Nicole M. van Dam	2	7	The_American_Naturalist	193	2019	female	German Centre for Integrative Biodiversity Research (iDiv) Halle-Jena-Leipzig, 04103 Leipzig	Germany	Europe	2541	db	2		pos	db
AN84	UV Photoreceptors and UV-Yellow Wing Pigments in Heliconius Butterflies Allow a Color Signal to Serve both Mimicry and Intraspecific Communication	https://doi/10.1086/663192	Article	Adriana D. Briscoe	2	7	The_American_Naturalist	179	2012	female	1. Department of Ecology and Evolutionary Biology, University of California, Irvine, California 92697;	USA	North_America	2541	db	-3		pre	sb
AN83	UV Photoreceptors and UV-Yellow Wing Pigments in Heliconius Butterflies Allow a Color Signal to Serve both Mimicry and Intraspecific Communication	https://doi/10.1086/663192	Article	Seth M. Bybee	1	7	The_American_Naturalist	179	2012	male	1. Department of Ecology and Evolutionary Biology, University of California, Irvine, California 92697;	USA	North_America	2541	db	-3		pre	sb
BSR	3D Imaging Insights into Forests and Coral Reefs	https://www.cell.com/trends/ecology-evolution/fulltext/S0169-5347(19)30283-6#%20	Forum	Kim Calders	1	7	Trends_in_Ecology_and_Evo	35	2020	male	CAVElab – Computational and Applied Vegetation Ecology, Faculty of Bioscience Engineering, Ghent University, B-9000 Ghent, Belgium	Belgium			sb	2			sb
BSR	3D Imaging Insights into Forests and Coral Reefs	https://www.cell.com/trends/ecology-evolution/fulltext/S0169-5347(19)30283-6#%20	Forum	Mathias Disney	2	7	Trends_in_Ecology_and_Evo	35	2020	male	UCL Department of Geography, University College London, Gower Street, London, WC1E 6BT, UK	UK			sb	2			sb
BSR	Predicting Chronic Climate-Driven Disturbances and Their Mitigation	https://www.cell.com/trends/ecology-evolution/fulltext/S0169-5347(17)30261-6	Opinion	Nate G. McDowell	1	7	Trends_in_Ecology_and_Evo	33	2018	male	Pacific Northwest National Laboratory, Richland, WA, USA	USA	North_America		sb	0			sb
BSR	Predicting Chronic Climate-Driven Disturbances and Their Mitigation	https://www.cell.com/trends/ecology-evolution/fulltext/S0169-5347(17)30261-6	Opinion	Richard S. Middleton	2	7	Trends_in_Ecology_and_Evo	33	2018	male	Earth and Environmental Sciences Division, Los Alamos National Laboratory, Los Alamos, NM, USA	USA	North_America		sb	0			sb
BSR	Evolution of Cellular Differentiation: From Hypotheses to Models		Review	Pedro M	1	7	Trends_in_Ecology_and_Evo	36	2021	male		USA			sb	3			sb
BSR	Evolution of Cellular Differentiation: From Hypotheses to Models		Review	Karl N	2	7	Trends_in_Ecology_and_Evo	36	2021	male		USA			sb	3			sb
MBS253	Coalescent_species_delimitation_of_a_Sumatran_parachuting_frog	https://doi.org/10.1111/zsc.12248	Original_article	Kyle_A_O'Connell	1	7	Zoologica_Scripta	47	2018	male	University_of_Texas	USA	North_America	2.603	sb	2	-3		sb
MBS253	Coalescent_species_delimitation_of_a_Sumatran_parachuting_frog	https://doi.org/10.1111/zsc.12248	Original_article	Matthew_K_Fujita	2	7	Zoologica_Scripta	47	2018	male	University_of_Texas	USA	North_America	2.603	sb	2	-3		sb
MBS266	Species_delimitation_in_Neotropical_fishes_of_the_genus_Characidium_(Teleostei,_Characiformes)	https://doi.org/10.1111/zsc.12318	Original_article	Érica_A_Serrano	1	7	Zoologica_Scripta	48	2019	female	Universidade_Estadual_Paulista	Brazil	South_America	2.603	sb	3	-2		sb
MBS266	Species_delimitation_in_Neotropical_fishes_of_the_genus_Characidium_(Teleostei,_Characiformes)	https://doi.org/10.1111/zsc.12318	Original_article	Fausto_Foresti	2	7	Zoologica_Scripta	48	2019	male	Universidade_Estadual_Paulista	Brazil	South_America	2.603	sb	3	-2		sb
MBS275	Novel_sexual_dimorphism_in_a_new_genus_of_Bathynellidae_from_Russia,_with_a_revision_of_phylogenetic_relationships	https://doi.org/10.1111/zsc.12387	Original_article	Ana_I_Camacho	1	7	Zoologica_Scripta	49	2020	female	Museo_Nacional_de_Ciencias_Naturales	Spain	Europe	2.603	sb	4	-1		sb
MBS275	Novel_sexual_dimorphism_in_a_new_genus_of_Bathynellidae_from_Russia,_with_a_revision_of_phylogenetic_relationships	https://doi.org/10.1111/zsc.12387	Original_article	Isabel_Rey	2	7	Zoologica_Scripta	49	2020	female	Museo_Nacional_de_Ciencias_Naturales	Spain	Europe	2.603	sb	4	-1		sb
CCS146	The_mammary_pheromone_of_the_rabbit:_from_where_does_it_come?	https://doi.org/10.1016/j.anbehav.2004.05.006	Research_article	Anne-Sophie_Moncomble	1	6	Animal_Behaviour	69	2005	female	Centre des Sciences du Goût, Ethology and Sensory Psychobiology Group, UMR 5170 CNRS-Université de Bourgogne-Inra, France	France	Europe	2.689	db	-4	-4	pre	sb
CCS146	The_mammary_pheromone_of_the_rabbit:_from_where_does_it_come?	https://doi.org/10.1016/j.anbehav.2004.05.006	Research_article	Benoist_Schaal	2	6	Animal_Behaviour	69	2005	male	Centre des Sciences du Goût, Ethology and Sensory Psychobiology Group, UMR 5170 CNRS-Université de Bourgogne-Inra, France	France	Europe	2.689	db	-4	-4	pre	sb
CCS188	The_innate_basis_of_food-hoarding_decisions_in_grey_squirrels:_evidence_for_behavioural_adaptations_to_the_oaks	https://doi.org/10.1016/j.anbehav.2005.05.005	Research_article	Michael_A_Steele	1	6	Animal_Behaviour	71	2006	male	Department of Biology, Wilkes University, Wilkes-Barre, PA, U.S.A.	USA	North_America	2.689	db	-3	-3	pre	sb
CCS188	The_innate_basis_of_food-hoarding_decisions_in_grey_squirrels:_evidence_for_behavioural_adaptations_to_the_oaks	https://doi.org/10.1016/j.anbehav.2005.05.005	Research_article	Michael_E_Pereira	1	6	Animal_Behaviour	71	2006	male	The Latin School of Chicago, IL, U.S.A.	USA	North_America	2.689	db	-3	-3	pre	sb
CCS235	Pleiotropic_antipredator_strategies,_fleeing_and_feigning_death,_correlated_with_dopamine_levels_in_Tribolium_castaneum	https://doi.org/10.1016/j.anbehav.2007.04.019	Research_article	Seiichi_Moriya	2	6	Animal_Behaviour	75	2008	male	National Agricultural Research Center, Tsukuba, Japan	Japan	Asia	2.689	db	-1	-1	pre	sb
CCS235	Pleiotropic_antipredator_strategies,_fleeing_and_feigning_death,_correlated_with_dopamine_levels_in_Tribolium_castaneum	https://doi.org/10.1016/j.anbehav.2007.04.019	Research_article	Takahisa_Miyatake	1	6	Animal_Behaviour	75	2008	male	Graduate School of Environmental Science, Okayama University, Japan	Japan	Asia	2.689	db	-1	-1	pre	sb
CCS363	Wild_bearded_capuchin_monkeys_(Cebus_libidinosus)_place_nuts_in_anvils_selectively	https://doi.org/10.1016/j.anbehav.2010.10.021	Research_article	Elisabetta_Visalberghi	2	6	Animal_Behaviour	81	2011	female	Consiglio Nazionale delle Ricerche	Italy	Europe	2.689	db	0	0	pos	db
CCS337	The_social_structure_of_New_Caledonian_crows	https://doi.org/10.1016/j.anbehav.2010.09.015	Research_article	Gavin_R_Hunt	2	6	Animal_Behaviour	81	2011	male	Department of Psychology, University of Auckland, New Zealand	New_Zealand	Europe	2.689	db	0	0	pos	db
CCS337	The_social_structure_of_New_Caledonian_crows	https://doi.org/10.1016/j.anbehav.2010.09.015	Research_article	_Jennifer_C_Holzhaider	1	6	Animal_Behaviour	81	2011	female	Department of Psychology, University of Auckland, Private Bag 92019, Auckland 1142, New Zealand.	New_Zealand	Oceania	2.689	db	0	0	pos	db
CCS365	Behavioural_type_affects_dominance_and_growth_in_staged_encounters_of_cooperatively_breeding_cichlids	https://doi.org/10.1016/j.anbehav.2010.11.001	Research_article	Dik_Heg	2	6	Animal_Behaviour	81	2011	male	University of Bern	Switzerland	Europe	2.689	db	0	0	pos	db
CCS365	Behavioural_type_affects_dominance_and_growth_in_staged_encounters_of_cooperatively_breeding_cichlids	https://doi.org/10.1016/j.anbehav.2010.11.001	Research_article	Thomas_Riebli	1	6	Animal_Behaviour	81	2011	male	University of Bern	Switzerland	Europe	2.689	db	0	0	pos	db
CCS331	Scent_marking_in_wild_banded_mongooses:_1._Sex-specific_scents_and_overmarking	https://doi.org/10.1016/j.anbehav.2010.07.010	Research_article	Michael_A_Cant	2	6	Animal_Behaviour	81	2011	male	School of Biosciences, University of Exeter (Cornwall Campus), U.K.	UK	Europe	2.689	db	0	0	pos	db
CCS331	Scent_marking_in_wild_banded_mongooses:_1._Sex-specific_scents_and_overmarking	https://doi.org/10.1016/j.anbehav.2010.07.010	Research_article	Neil_R_Jordan	1	6	Animal_Behaviour	81	2011	male	Large Animal Research Group, Department of Zoology, University of Cambridge, U.K.	UK	Europe	2.689	db	0	0	pos	db
CCS332	Scent_marking_in_wild_banded_mongooses:_2._Intrasexual_overmarking_and_competition_between_males	https://doi.org/10.1016/j.anbehav.2010.07.009	Research_article	Michael_A_Cant	2	6	Animal_Behaviour	81	2011	male	School of Biosciences, University of Exeter (Cornwall Campus), U.K.	UK	Europe	2.689	db	0	0	pos	db
CCS332	Scent_marking_in_wild_banded_mongooses:_2._Intrasexual_overmarking_and_competition_between_males	https://doi.org/10.1016/j.anbehav.2010.07.008	Research_article	Neil_R_Jordan	1	6	Animal_Behaviour	81	2011	male	Large Animal Research Group, Department of Zoology, University of Cambridge, U.K.	UK	Europe	2.689	db	0	0	pos	db
CCS333	Scent_marking_in_wild_banded_mongooses:_3._Intrasexual_overmarking_in_females	https://doi.org/10.1016/j.anbehav.2010.10.007	Research_article	Michael_A_Cant	2	6	Animal_Behaviour	81	2011	male	School of Biosciences, University of Exeter (Cornwall Campus), U.K.	UK	Europe	2.689	db	0	0	pos	db
CCS333	Scent_marking_in_wild_banded_mongooses:_3._Intrasexual_overmarking_in_females	https://doi.org/10.1016/j.anbehav.2010.10.007	Research_article	Neil_R_Jordan	1	6	Animal_Behaviour	81	2011	male	Large Animal Research Group, Department of Zoology, University of Cambridge, U.K.	UK	Europe	2.689	db	0	0	pos	db
CCS363	Wild_bearded_capuchin_monkeys_(Cebus_libidinosus)_place_nuts_in_anvils_selectively	https://doi.org/10.1016/j.anbehav.2010.10.021	Research_article	Qing_Liu	1	6	Animal_Behaviour	81	2011	male	University of Georgia	USA	North_America	2.689	db	0	0	pos	db
CCS377	Flexibility_in_the_duration_of_parental_care:_zebra_finch_parents_respond_to_offspring_needs	https://doi.org/10.1016/j.anbehav.2011.10.003	Research_article	Fritz_Trillmich	2	6	Animal_Behaviour	83	2012	male	Department of Behavioural Biology, Bielefeld University, Germany	Germany	Europe	2.689	db	1	1	pos	db
CCS409	Mothers_never_miss_the_moment:_a_fine-tuned_mechanism_for_vertical_symbiont_transmission_in_a_subsocial_insect	https://doi.org/10.1016/j.anbehav.2011.11.006	Research_article	Takahiro_Hosokawa	1	6	Animal_Behaviour	83	2012	male	National Institute of Advanced Industrial Science and Technology	Japan	Asia	2.689	db	1	1	pos	db
CCS409	Mothers_never_miss_the_moment:_a_fine-tuned_mechanism_for_vertical_symbiont_transmission_in_a_subsocial_insect	https://doi.org/10.1016/j.anbehav.2011.11.006	Research_article	Takema_Fukatsu	2	6	Animal_Behaviour	83	2012	male	National Institute of Advanced Industrial Science and Technology	Japan	Asia	2.689	db	1	1	pos	db
CCS377	Flexibility_in_the_duration_of_parental_care:_zebra_finch_parents_respond_to_offspring_needs	https://doi.org/10.1016/j.anbehav.2011.10.003	Research_article	Anke_Rehling	1	6	Animal_Behaviour	83	2012	female	College of Medical, Veterinary and Life Sciences, University of Glasgow, U.K.	UK	Europe	2.689	db	1	1	pos	db
CCS384	Firefly_flashing_and_jumping_spider_predation	https://doi.org/10.1016/j.anbehav.2011.10.008	Research_article	Elizabeth_M_Jakob	2	6	Animal_Behaviour	83	2012	female	Department of Psychology, University of Massachusetts Amherst, Amherst, MA, U.S.A.	USA	North_America	2.689	db	1	1	pos	db
CCS384	Firefly_flashing_and_jumping_spider_predation	https://doi.org/10.1016/j.anbehav.2011.10.008	Research_article	Skye_M_Long	1	6	Animal_Behaviour	83	2012	female	University of Massachusetts Amherst, Amherst, MA, U.S.A.	USA	North_America	2.689	db	1	1	pos	db
CCS425	Faking_it:_deliberately_altered_voice_pitch_and_vocal_attractiveness	https://doi.org/10.1016/j.anbehav.2012.10.015	Research_article	David_R._Feinberg	2	6	Animal_Behaviour	85	2013	male	Department of Psychology, Neuroscience & Behaviour, McMaster University, Hamilton, ON, Canada	Canada	North_America	2.689	db	2	2	pos	db
CCS425	Faking_it:_deliberately_altered_voice_pitch_and_vocal_attractiveness	https://doi.org/10.1016/j.anbehav.2012.10.015	Research_article	Paul_J._Fraccaro	1	6	Animal_Behaviour	85	2013	male	Department of Psychology, Neuroscience & Behaviour, McMaster University, Hamilton, ON, Canada	Canada	North_America	2.689	db	2	2	pos	db
CCS417	The_effect_of_alloparental_experience_and_care_on_anxiety-like,_social_and_parental_behaviour_in_adult_mandarin_voles	https://doi.org/10.1016/j.anbehav.2012.10.007	Research_article	Yani_Li	2	6	Animal_Behaviour	85	2013	female	Shaanxi Normal University, Xi'an, China	China	Asia	2.689	db	2	2	pos	db
CCS417	The_effect_of_alloparental_experience_and_care_on_anxiety-like,_social_and_parental_behaviour_in_adult_mandarin_voles	https://doi.org/10.1016/j.anbehav.2012.10.007	Research_article	Ruiyong_Wu	1	6	Animal_Behaviour	85	2013	male	Shaanxi Normal University, Xi'an, China	China	Asia	2.689	db	2	2	pos	db
CCS436	Learnt_information_in_species-specific_‘trail_pheromone’_communication_in_stingless_bees	https://doi.org/10.1016/j.anbehav.2012.10.029	Research_article	Christian_Reichle	1	6	Animal_Behaviour	85	2013	male	Institute for Experimental Ecology, University of Ulm, Ulm, Germany	Germany	Europe	2.689	db	2	2	pos	db
CCS436	Learnt_information_in_species-specific_‘trail_pheromone’_communication_in_stingless_bees	https://doi.org/10.1016/j.anbehav.2012.10.029	Research_article	Stefan_Jarau	2	6	Animal_Behaviour	85	2013	male	Institute for Experimental Ecology, University of Ulm, Ulm, Germany	Germany	Europe	2.689	db	2	2	pos	db
CCS434	Facial_markings_in_the_hover_wasps:_quality_signals_and_familiar_recognition_cues_in_two_species_of_Stenogastrinae	https://doi.org/10.1016/j.anbehav.2012.10.027	Research_article	David_Baracchi	1	6	Animal_Behaviour	85	2013	male	Dipartimento di Biologia Evoluzionistica ‘Leo Pardi’, Firenze, Italy	Italy	Europe	2.689	db	2	2	pos	db
CCS434	Facial_markings_in_the_hover_wasps:_quality_signals_and_familiar_recognition_cues_in_two_species_of_Stenogastrinae	https://doi.org/10.1016/j.anbehav.2012.10.027	Research_article	Stefano_Turillazzi	2	6	Animal_Behaviour	85	2013	male	Dipartimento di Biologia Evoluzionistica ‘Leo Pardi’, Firenze, Italy	Italy	Europe	2.689	db	2	2	pos	db
LMDV569	Seed_development_following_reciprocal_crossing_among_autotetraploid_and_diploid_Acacia_mangium_and_diploid_A._auriculiformis	https://doi.org/10.1071/BT15130	Research_article	Anthony_Koutoulis	2	6	Australian_Journal_of_Botany	64	2016	male	School of Biological Sciences, University of Tasmania, Private Bag 55, Hobart, Tas. 7001, Australia	Australia	Oceania	1.386	sb	0	-5		sb
LMDV569	Seed_development_following_reciprocal_crossing_among_autotetraploid_and_diploid_Acacia_mangium_and_diploid_A._auriculiformis	https://doi.org/10.1071/BT15130	Research_article	Chi_Quynh_Nghiem	1	6	Australian_Journal_of_Botany	64	2016	female	Institute of Forest Tree Improvement and Biotechnology, the Vietnamese Academy of Forest Sciences, Hanoi, Vietnam	Vietnam	Asia	1.386	sb	0	-5		sb
LMDV602	Mulling_over_the_mulla_mullas:_revisiting_phosphorus_hyperaccumulation_in_the_Australian_plant_genus_Ptilotus_(Amaranthaceae)	https://doi.org/10.1071/BT19188	Research_article	Megan_H_Ryan	2	6	Australian_Journal_of_Botany	68	2020	female	The UWA Institute of Agriculture, The University of Western Australia, 35 Stirling Highway, Crawley, WA 6009, Australia.	Australia	Oceania	1.386	sb	4	-1		sb
LMDV602	Mulling_over_the_mulla_mullas:_revisiting_phosphorus_hyperaccumulation_in_the_Australian_plant_genus_Ptilotus_(Amaranthaceae)	https://doi.org/10.1071/BT19188	Research_article	Timothy_A_Hammer	1	6	Australian_Journal_of_Botany	68	2020	male	School of Biological Sciences, The University of Western Australia, 35 Stirling Highway, Crawley, WA 6009, Australia.	Australia	Oceania	1.386	sb	4	-1		sb
BSR557	Species_traits_and_local_abundance_affect_bird-window_collision_frequency	http://dx.doi.org/10.5751/ACE-01014-120117	Research_article	Thomas_W._Wittig	1	6	Avian_Conservation_and_Ecology	12	2017	male	Duke_University	USA	North_America	2.541	db	1	1		db
BSR557	Species_traits_and_local_abundance_affect_bird-window_collision_frequency	http://dx.doi.org/10.5751/ACE-01014-120117	Research_article	Zane_Lichtneger	2	6	Avian_Conservation_and_Ecology	12	2017	male	SAS_Institute_Inc.	USA	North_America	2.541	db	1	1		db
BSR574	Postfledging_survival_and_local_recruitment_of_a_riparian_songbird_in_habitat_influenced_by_reservoir_operations	http://dx.doi.org/10.5751/ACE-01190-130112	Research_article	David_J._Green	2	6	Avian_Conservation_and_Ecology	13	2018	male	Simon_Fraser_University	Canada	North_America	2.541	db	2	2		db
BSR574	Postfledging_survival_and_local_recruitment_of_a_riparian_songbird_in_habitat_influenced_by_reservoir_operations	http://dx.doi.org/10.5751/ACE-01190-130112	Research_article	Matthew_Hepp	1	6	Avian_Conservation_and_Ecology	13	2018	male	Simon_Fraser_University	Canada	North_America	2.541	db	2	2		db
BSR580	Using_a_natural_reference_system_to_evaluate_songbird_habitat_restoration	http://dx.doi.org/10.5751/ACE-01193-130122	Research_article	Darin_J._McNeil	1	6	Avian_Conservation_and_Ecology	13	2018	male	Indiana_University_of_Pennsylvania	USA	North_America	2.541	db	2	2		db
BSR580	Using_a_natural_reference_system_to_evaluate_songbird_habitat_restoration	http://dx.doi.org/10.5751/ACE-01193-130122	Research_article	Jeffery_L._Larkin	2	6	Avian_Conservation_and_Ecology	13	2018	male	Indiana_University_of_Pennsylvania	USA	North_America	2.541	db	2	2		db
BSR605	Pathways_for_avian_science,_conservation,_and_management_in_boreal_Alaska	http://dx.doi.org/10.5751/ACE-01347-140115	Essay	Steven_M._Matsuoka	1	6	Avian_Conservation_and_Ecology	14	2019	male	Boreal_Avian_Modelling_Project	Canada	North_America	2.541	db	3	3		db
BSR605	Pathways_for_avian_science,_conservation,_and_management_in_boreal_Alaska	http://dx.doi.org/10.5751/ACE-01347-140115	Essay	Moira_A._Ingle	2	6	Avian_Conservation_and_Ecology	14	2019	female	Alaska_Department_of_Fish_and_Game	USA	North_America	2.541	db	3	3		db
BSR628	Bioacoustic_analyses_reveal_that_bird_communities_recover_with_forest_succession_in_tropical_dry_forests	http://dx.doi.org/10.5751/ACE-01615-150125	Research_article	Kiirsti_C._Owen	1	6	Avian_Conservation_and_Ecology	15	2020	female	University_of_Windsor	Canada	North_America	2.541	db	4	4		db
BSR616	Breeding_population_decline_and_associations_with_nest_site_use_of_Leach’s_Storm-Petrels_on_Kent_Island,_New_Brunswick_from_2001_to_2018	http://dx.doi.org/10.5751/ACE-01526-150111	Research_article	Kyle_J._N._d'Entremont	1	6	Avian_Conservation_and_Ecology	15	2020	male	Dalhousie_University	Canada	North_America	2.541	db	4	4		db
BSR616	Breeding_population_decline_and_associations_with_nest_site_use_of_Leach’s_Storm-Petrels_on_Kent_Island,_New_Brunswick_from_2001_to_2018	http://dx.doi.org/10.5751/ACE-01526-150111	Research_article	Robert_A._Ronconi	2	6	Avian_Conservation_and_Ecology	15	2020	male	Environment_and_Climate_Change_Canada	Canada	North_America	2.541	db	4	4		db
BSR628	Bioacoustic_analyses_reveal_that_bird_communities_recover_with_forest_succession_in_tropical_dry_forests	http://dx.doi.org/10.5751/ACE-01615-150125	Research_article	Daniel_J._Mennill	2	6	Avian_Conservation_and_Ecology	15	2020	male	University_of_Windsor	Canada	North_America	2.541	db	4	4		db
BSR269	Mate_choice_based_on_static_versus_dynamic_secondary_sexual_traits_in_the_dark-eyed_junco	https://doi.org/10.1093/beheco/10.1.91	Article	Jennifer_A_Hill	1	6	Behavioral_Ecology	10	1999	female	Illinois_Natural_History_Survey	USA	North_America	2.761	db	-2	-2	pre	sb
BSR269	Mate_choice_based_on_static_versus_dynamic_secondary_sexual_traits_in_the_dark-eyed_junco	https://doi.org/10.1093/beheco/10.1.91	Article	Charles_Ziegenfus	2	6	Behavioral_Ecology	10	1999	male	James_Madison_University	USA	North_America	2.761	db	-2	-2	pre	sb
BSR360	Immune_challenge_mediates_vocal_communication_in_a_passerine_bird:_an_experiment	https://doi.org/10.1093/beheco/arg108	Article	László_Zsolt_Garamszegi	1	6	Behavioral_Ecology	15	2004	male	University_of_Antwerp	Belgium	Europe	2.761	db	1	1	pos	db
BSR360	Immune_challenge_mediates_vocal_communication_in_a_passerine_bird:_an_experiment	https://doi.org/10.1093/beheco/arg108	Article	Murielle_Richard	2	6	Behavioral_Ecology	15	2004	female	Universite´_Pierre_et_Marie_Curie	France	Europe	2.761	db	1	1	pos	db
BSR407	Operational_sex_ratio_in_newts:_field_responses_and_characterization_of_a_constituent_chemical_cue	https://doi.org/10.1093/beheco/arh164	Article	Dale_M._Madison	2	6	Behavioral_Ecology	16	2005	male	Binghamton_University	USA	North_America	2.761	db	2	2	pos	db
BSR407	Operational_sex_ratio_in_newts:_field_responses_and_characterization_of_a_constituent_chemical_cue	https://doi.org/10.1093/beheco/arh164	Article	Jason_R._Rohr	1	6	Behavioral_Ecology	16	2005	male	Binghamton_University	USA	North_America	2.761	db	2	2	pos	db
CCS	Sex ratio and male sexual characters in a population of blue tits, Parus caeruleus	https://doi.org/10.1093/beheco/ari089	Research_paper	Amélie N. Dreiss	1	6	Behavioral_Ecology	17	2006	female	Laboratoire Fonctionnement et Evolution des Syste`mes Ecologiques, UMR 7625, Universite´ Pierre et Marie Curie	France	cont	2.541	db	3	3	pos	db
CCS	Sex ratio and male sexual characters in a population of blue tits, Parus caeruleus	https://doi.org/10.1093/beheco/ari089	Research_paper	Etienne Danchin	2	6	Behavioral_Ecology	17	2006	male	Laboratoire Evolution et Diversite´ Biologique, Universite´ Paul Sabatier, Toulouse, France	France	cont	2.541	db	3	3	pos	db
LFLL22	First_record_of_Puerulus_mesodontus_Chan,_Ma_&_Chu,_2013_(Crustacea,_Decapoda,_Achelata,_Palinuridae)_from_south_of_Java,_Indonesia	https://doi.org/10.3897/BDJ.4.e8069	Research_article	Achmad_Farajallah	2	6	Biodiversity_Data_Journal	4	2016	male	Bogor_Agricultural_University	Indonesia	Asia	1,33	sb	0	-5		sb
LFLL22	First_record_of_Puerulus_mesodontus_Chan,_Ma_&_Chu,_2013_(Crustacea,_Decapoda,_Achelata,_Palinuridae)_from_south_of_Java,_Indonesia	https://doi.org/10.3897/BDJ.4.e8069	Research_article	Yusli_Wardiatno	1	6	Biodiversity_Data_Journal	4	2016	male	Bogor_Agricultural_University	Indonesia	Asia	1,33	sb	0	-5		sb
LFLL39	An_endangered_West_African_rattan_palm:_Eremospatha_dransfieldii	https://doi.org/10.3897/BDJ.5.e11176	Conservation_Profile	Ariane_Cosiaux	1	6	Biodiversity_Data_Journal	5	2017	female	University_of_Yaoundé	Cameroon	Africa	1,33	sb	1	-4		sb
LFLL49	Nine_new_species_of_Uramya_Robineau-Desvoidy_(Diptera:_Tachinidae)_from_Area_de_Conservación_Guanacaste_in_northwestern_Costa_Rica,_with_a_key_to_their_identification	https://doi.org/10.3897/BDJ.5.e9649	Article	AJ_Fleming	1	6	Biodiversity_Data_Journal	5	2017	male	Agriculture_Agri-Food_Canada	Canada	North_America	1,33	sb	1	-4		sb
LFLL39	An_endangered_West_African_rattan_palm:_Eremospatha_dransfieldii	https://doi.org/10.3897/BDJ.5.e11176	Conservation_Profile	Thomas_LP_Couvreur	2	6	Biodiversity_Data_Journal	5	2017	male	Institut_de_Recherche_pour_le_Développement	France	Europe	1,33	sb	1	-4		sb
LFLL49	Nine_new_species_of_Uramya_Robineau-Desvoidy_(Diptera:_Tachinidae)_from_Area_de_Conservación_Guanacaste_in_northwestern_Costa_Rica,_with_a_key_to_their_identification	https://doi.org/10.3897/BDJ.5.e9649	Article	Tanya_Dapkey	2	6	Biodiversity_Data_Journal	5	2017	female	University_of_Pennsylvania	USA	North_America	1,33	sb	1	-4		sb
LFLL82	Reference_DNA_barcodes_and_other_mitochondrial_markers_for_identifying_Caribbean_Octocorals	https://doi.org/10.3897/BDJ.7.e30970r	Research_article	Rachel_Collin	2	6	Biodiversity_Data_Journal	7	2019	female	Smithsonian_Tropical_Research_Institute	Panama	Central_America	1,33	sb	3	-2		sb
LFLL82	Reference_DNA_barcodes_and_other_mitochondrial_markers_for_identifying_Caribbean_Octocorals	https://doi.org/10.3897/BDJ.7.e30970r	Research_article	Jaime_Morín	1	6	Biodiversity_Data_Journal	7	2019	male	Universidad_Nacional_Mayor_de_San_Marcos	Peru	South_America	1,33	sb	3	-2		sb
LFLL112	A_new_genus_and_new_species_in_the_tribe_Uramyini_(Diptera:_Tachinidae)_from_Area_de_Conservación_Guanacaste_in_northwestern_Costa_Rica	https://doi.org/10.3897/BDJ.8.e48907	Article	AJ_Fleming	1	6	Biodiversity_Data_Journal	8	2020	male	Agriculture_Agri-Food_Canada	Canada	North_America	1,33	sb	4	-1		sb
LFLL117	A_new_alien_mantis_in_Italy:_is_the_Indochina_mantis_Hierodula_patellifera_chasing_the_train_for_Europe?	https://doi.org/10.3897/BDJ.8.e50779	Research_article	Enzo_Moretto	2	6	Biodiversity_Data_Journal	8	2020	male	Esapolis_Invertebrate_Museum_&_Butterfly_Arc	Italy	Europe	1,33	sb	4	-1		sb
LFLL117	A_new_alien_mantis_in_Italy:_is_the_Indochina_mantis_Hierodula_patellifera_chasing_the_train_for_Europe?	https://doi.org/10.3897/BDJ.8.e50779	Research_article	Roberto_Battiston	1	6	Biodiversity_Data_Journal	8	2020	male	Musei_del_Canal_di_Brenta	Italy	Europe	1,33	sb	4	-1		sb
LFLL91	Documenting_decapod_biodiversity_in_the_Caribbean_from_DNA_barcodes_generated_during_field_training_in_taxonomy	https://doi.org/10.3897/BDJ.8.e47333	Research_article	Rachel_Collin	2	6	Biodiversity_Data_Journal	8	2020	female	Smithsonian_Tropical_Research_Institute	Panama	Central_America	1,33	sb	4	-1		sb
LFLL91	Documenting_decapod_biodiversity_in_the_Caribbean_from_DNA_barcodes_generated_during_field_training_in_taxonomy	https://doi.org/10.3897/BDJ.8.e47333	Research_article	Dagoberto_Venera-Pontón	1	6	Biodiversity_Data_Journal	8	2020	male	Smithsonian_Tropical_Research_Institute	Panama	Central_America	1,33	sb	4	-1		sb
LFLL112	A_new_genus_and_new_species_in_the_tribe_Uramyini_(Diptera:_Tachinidae)_from_Area_de_Conservación_Guanacaste_in_northwestern_Costa_Rica	https://doi.org/10.3897/BDJ.8.e48907	Article	Daniel_Janzen	2	6	Biodiversity_Data_Journal	8	2020	male	University_of_Pennsylvania	USA	North_America	1,33	sb	4	-1		sb
CCS639	Distribution_of_the_invasive_calanoid_copepod_Pseudodiaptomus_marinus_(Sato,_1913)_in_the_Belgian_part_of_the_North_Sea	https://doi.org/10.3391/bir.2018.7.1.055	Research_article	Marleen_De_Troch	2	6	Bioinvasions_Records	7	2018	female	Ghent University	Belgium	Europe	1,5	db	2	2		db
CCS639	Distribution_of_the_invasive_calanoid_copepod_Pseudodiaptomus_marinus_(Sato,_1913)_in_the_Belgian_part_of_the_North_Sea	https://doi.org/10.3391/bir.2018.7.1.05	Research_article	Yana_Deschutter	1	6	Bioinvasions_Records	7	2018	female	Ghent University	Belgium	Europe	1,5	db	2	2		db
CCS668	“Flying_under_the_radar”_–_how_misleading_distributional_data_led_to_wrong_appreciation_of_knotweeds_invasion_(Reynoutria_spp.)_in_Croatia	https://doi.org/10.3391/bir.2019.8.1.19	Research_article	Nina_Vuković	1	6	Bioinvasions_Records	8	2019	female	University of Zagreb, Department of Biology, Division of Botany, Marulićev trg 20/II, 10000 Zagreb, Croatia	Croatia	Europe	1,5	db	3	3		db
CCS668	“Flying_under_the_radar”_–_how_misleading_distributional_data_led_to_wrong_appreciation_of_knotweeds_invasion_(Reynoutria_spp.)_in_Croatia	https://doi.org/10.3391/bir.2019.8.1.20	Research_article	Stjepan_Dekanić	2	6	Bioinvasions_Records	8	2019	male	Perceptives Ltd., Koprivnička ulica 38, 10000 Zagreb, Croatia	Croatia	Europe	1,5	db	3	3		db
CCS650	First_detection_of_a_highly_invasive_freshwater_amphipod_Crangonyx_floridanus_(Bousfield,_1963)_in_the_United_Kingdom	https://doi.org/10.3391/bir.2019.8.1.01	Research_article	Michael_Sweet	2	6	Bioinvasions_Records	8	2019	male	Aquatic Research Facility, Environmental Sustainability Research Centre, University of Derby, Derby, DE22 1GB, UK	UK	Europe	1,5	db	3	3		db
CCS650	First_detection_of_a_highly_invasive_freshwater_amphipod_Crangonyx_floridanus_(Bousfield,_1963)_in_the_United_Kingdom	https://doi.org/10.3391/bir.2019.8.1.01	Research_article	Quentin_Mauvisseau	1	6	Bioinvasions_Records	8	2019	male	Aquatic Research Facility, Environmental Sustainability Research Centre, University of Derby, Derby, DE22 1GB, UK	UK	Europe	1,5	db	3	3		db
CCS680	First_record_of_American_lobster,_Homarus_americanus_(H._Milne_Edwards,_1837),_in_the_Mediterranean_Sea	https://doi.org/10.3391/bir.2020.9.1.11	Research_article	Tanja_Šegvić-Bubić	2	6	Bioinvasions_Records	9	2020	female	Institute of Oceanography and Fisheries, Šetalište I. Meštrovića 63, 21000 Split, Croatia	Croatia	Europe	1,5	db	4	4		db
CCS680	First_record_of_American_lobster,_Homarus_americanus_(H._Milne_Edwards,_1837),_in_the_Mediterranean_Sea	https://doi.org/10.3391/bir.2020.9.1.11	Research_article	Mišo_Pavičić	1	6	Bioinvasions_Records	9	2020	male	Institute of Oceanography and Fisheries, Šetalište I. Meštrovića 63, 21000 Split, Croatia	Croatia	Europe	1,5	db	4	4		db
CCS684	The_invasive_New_Zealand_mud_snail_Potamopyrgus_antipodarum_(J.E._Gray,_1843)_in_central_Pennsylvania	https://doi.org/10.3391/bir.2020.9.1.15	Research_article	Edward_P._Levri	1	6	Bioinvasions_Records	9	2020	male	Division of Mathematics and Natural Sciences, Penn State – Altoona, 3000 Ivyside Park, Altoona, PA 16601, USA	USA	North_America	1,5	db	4	4		db
CCS684	The_invasive_New_Zealand_mud_snail_Potamopyrgus_antipodarum_(J.E._Gray,_1843)_in_central_Pennsylvania	https://doi.org/10.3391/bir.2020.9.1.15	Research_article	Xiaosong_Li	2	6	Bioinvasions_Records	9	2020	male	Department of Energy and Mineral Engineering, Penn State University, University Park, PA 16802, USA	USA	North_America	1,5	db	4	4		db
MBS152	Museomics_illuminate_the_history_of_an_extinct,_paleoendemic_plant_lineage_(Hesperelaea,_Oleaceae)_known_from_an_1875_collection_from_Guadalupe_Island,_Mexico	https://doi.org/10.1111/bij.12509	Research_article	Loubab_Zedane	1	6	Biological_Journal_Of_The_Linnean_Society	117	2016	female	Université_Paul_Sabatier	France	Europe	1,96	sb	0	-5		sb
MBS152	Museomics_illuminate_the_history_of_an_extinct,_paleoendemic_plant_lineage_(Hesperelaea,_Oleaceae)_known_from_an_1875_collection_from_Guadalupe_Island,_Mexico	https://doi.org/10.1111/bij.12509	Research_article	Guillaume_Besnard	2	6	Biological_Journal_Of_The_Linnean_Society	117	2016	male	Université_Paul_Sabatier	France	Europe	1,96	sb	0	-5		sb
MBS154	Valuing_museum_specimens:_high-throughput_DNA_sequencing_on_historical_collections_of_New_Guinea_crowned_pigeons_(Goura)	https://doi.org/10.1111/bij.12494	Research_article	Christophe_Thébaud	2	6	Biological_Journal_Of_The_Linnean_Society	117	2016	male	Université_Paul_Sabatier	France	Europe	1,96	sb	0	-5		sb
MBS154	Valuing_museum_specimens:_high-throughput_DNA_sequencing_on_historical_collections_of_New_Guinea_crowned_pigeons_(Goura)	https://doi.org/10.1111/bij.12494	Research_article	Guillaume_Besnard	1	6	Biological_Journal_Of_The_Linnean_Society	117	2016	male	Université_Paul_Sabatier	France	Europe	1,96	sb	0	-5		sb
MBS158	First_steps_in_studying_the_origins_of_secondary_woodiness_in_Begonia_(Begoniaceae):_combining_anatomy,_phylogenetics,_and_stem_transcriptomics	https://doi.org/10.1111/bij.12492	Research_article	Frederic_Lens	2	6	Biological_Journal_Of_The_Linnean_Society	117	2016	male	Leiden_University	The_Netherlands	Europe	1,96	sb	0	-5		sb
MBS158	First_steps_in_studying_the_origins_of_secondary_woodiness_in_Begonia_(Begoniaceae):_combining_anatomy,_phylogenetics,_and_stem_transcriptomics	https://doi.org/10.1111/bij.12492	Research_article	Catherine_Kidner	1	6	Biological_Journal_Of_The_Linnean_Society	117	2016	female	Royal_Botanic_Gardens	UK	Europe	1,96	sb	0	-5		sb
MBS171	Phylogeography_and_species_delimitation_in_convict_cichlids_(Cichlidae:_Amatitlania):_implications_for_taxonomy_and_Plio–Pleistocene_evolutionary_history_in_Central_America	https://doi.org/10.1111/bij.12845	Research_article	Jerald_B_Johnson	2	6	Biological_Journal_Of_The_Linnean_Society	120	2017	male	Brigham_Young_University	USA	North_America	1,96	sb	1	-4		sb
MBS171	Phylogeography_and_species_delimitation_in_convict_cichlids_(Cichlidae:_Amatitlania):_implications_for_taxonomy_and_Plio–Pleistocene_evolutionary_history_in_Central_America	https://doi.org/10.1111/bij.12845	Research_article	Justin_C_Bagley	1	6	Biological_Journal_Of_The_Linnean_Society	120	2017	male	Brigham_Young_University	USA	North_America	1,96	sb	1	-4		sb
MBS194	Deep_intraspecific_divergence_in_Drosophila_meridionalis,_a_cactophilic_member_of_the_New_World_Drosophila_repleta_group	https://doi.org/10.1093/biolinnean/blx134	Original_article	Dora_Yovana_Barrios-Leal	1	6	Biological_Journal_Of_The_Linnean_Society	123	2018	female	Universidade_de_São_Paulo	Brazil	South_America	1,96	sb	2	-3		sb
MBS194	Deep_intraspecific_divergence_in_Drosophila_meridionalis,_a_cactophilic_member_of_the_New_World_Drosophila_repleta_group	https://doi.org/10.1093/biolinnean/blx134	Original_article	Maura_Helena_Manfrin	2	6	Biological_Journal_Of_The_Linnean_Society	123	2018	female	Universidade_de_São_Paulo	Brazil	South_America	1,96	sb	2	-3		sb
MBS203	Litter_size_variation_in_didelphid_marsupials:_evidence_of_phylogenetic_constraints_and_adaptation	https://doi.org/10.1093/biolinnean/bly157	Original_article	Thaís_Battistella	1	6	Biological_Journal_Of_The_Linnean_Society	126	2019	female	Universidade_Federal_de_Santa_Maria	Brazil	South_America	1,96	sb	3	-2		sb
MBS203	Litter_size_variation_in_didelphid_marsupials:_evidence_of_phylogenetic_constraints_and_adaptation	https://doi.org/10.1093/biolinnean/bly157	Original_article	Nilton_Cáceres	2	6	Biological_Journal_Of_The_Linnean_Society	126	2019	male	Universidade_Federal_de_Santa_Maria	Brazil	South_America	1,96	sb	3	-2		sb
MBS227	Geographical_isolation_and_restricted_gene_flow_drive_speciation_of_Aegla_singularis_(Decapoda:_Anomura:_Aeglidae)_in_southern_South_America	https://doi.org/10.1093/biolinnean/blz148	Original_article	Gisela_Loretán	1	6	Biological_Journal_Of_The_Linnean_Society	129	2020	female	Universidad_Nacional_del_Litoral	Argentina	South_America	1,96	sb	4	-1		sb
MBS227	Geographical_isolation_and_restricted_gene_flow_drive_speciation_of_Aegla_singularis_(Decapoda:_Anomura:_Aeglidae)_in_southern_South_America	https://doi.org/10.1093/biolinnean/blz148	Original_article	Federico_Giri	2	6	Biological_Journal_Of_The_Linnean_Society	129	2020	male	Universidad_Nacional_del_Litoral	Argentina	South_America	1,96	sb	4	-1		sb
MBS222	The_other_side_of_the_Sahulian_coin:_biogeography_and_evolution_of_Melanesian_forest_dragons_(Agamidae)	https://doi.org/10.1093/biolinnean/blz125	Original_article	Paul_M_Oliver	2	6	Biological_Journal_Of_The_Linnean_Society	129	2020	male	Griffith_University	Australia	Oceania	1,96	sb	4	-1		sb
MBS222	The_other_side_of_the_Sahulian_coin:_biogeography_and_evolution_of_Melanesian_forest_dragons_(Agamidae)	https://doi.org/10.1093/biolinnean/blz125	Original_article	Oliver_J_S_Tallowin	1	6	Biological_Journal_Of_The_Linnean_Society	129	2020	male	UN_Environment_World_Conservation_Monitoring_Centre	UK	Europe	1,96	sb	4	-1		sb
CCS40	Postglacial_history_of_Atlantic_oakwoods:_Context,_dynamics_and_controlling_factors	https://doi.org/10.1080/03746600508685084	Original_article	Joseph_Le_Cuziat	2	6	Botanical_Journal_of_Scotland	57	2005	male	CEREGE CNRS 6635/Université Paul Cézanne , Europôle Méditerranéen de l'Arbois , BP80, F-13545 , Aix-en-Provence cedex 4 , France Correspondencebrewer@cerege.fr	France	Europe	1,2	db	-2	-2	pre	sb
CCS40	Postglacial_history_of_Atlantic_oakwoods:_Context,_dynamics_and_controlling_factors	https://doi.org/10.1080/03746600508685084	Original_article	Simon_Brewer	1	6	Botanical_Journal_of_Scotland	57	2005	male	CEREGE CNRS 6635/Université Paul Cézanne , Europôle Méditerranéen de l'Arbois , BP80, F-13545 , Aix-en-Provence cedex 4 , France Correspondencebrewer@cerege.fr	France	Europe	1,2	db	-2	-2	pre	sb
CCS100	Winter_warming_pulses_affect_the_development_of_planted_temperate_grassland_and_dwarf-shrub_heath_communities	https://doi.org/10.1080/17550874.2011.558125	Article	Carl_Beierkuhnlein	2	6	Botanical_Journal_of_Scotland	4	2011	male	University of Bayreuth, Biogeography , Bayreuth, Germany Correspondencejuergen.kreyling@uni-bayreuth.de	Germany	Europe	1,2	db	1	1	pos	db
CCS100	Winter_warming_pulses_affect_the_development_of_planted_temperate_grassland_and_dwarf-shrub_heath_communities	https://doi.org/10.1080/17550874.2011.558125	Article	Juergen_Kreyling	1	6	Botanical_Journal_of_Scotland	4	2011	male	University of Bayreuth, Biogeography , Bayreuth, Germany Correspondencejuergen.kreyling@uni-bayreuth.de	Germany	Europe	1,2	db	1	1	pos	db
CCS106	Using_digital_camera_images_to_detect_canopy_condition_of_deciduous_broad-leaved_trees	https://doi.org/10.1080/17550874.2011.579188	Article	Shin_Nagai	1	6	Botanical_Journal_of_Scotland	4	2011	female	Research Institute for Global Change, Japan Agency for Marine-Earth Science and Technology , Yokohama, Japan ; National Institute of Advanced Industrial Science and Technology , Tsukuba, Japan Correspondencenagais@jamstec.go.jp	Japan	Europe	1,2	db	1	1	pos	db
CCS106	Using_digital_camera_images_to_detect_canopy_condition_of_deciduous_broad-leaved_trees	https://doi.org/10.1080/17550874.2011.579188	Article	Kenlo_Nishida_Nasahara	2	6	Botanical_Journal_of_Scotland	4	2011	male	Research Institute for Global Change, Japan Agency for Marine-Earth Science and Technology , Yokohama, Japan ; National Institute of Advanced Industrial Science and Technology , Tsukuba, Japan Correspondencenagais@jamstec.go.jp	Japan	Europe	1,2	db	1	1	pos	db
CCS105	The_comparison_of_several_colour_indices_for_the_photographic_recording_of_canopy_phenology_of__Fagus_crenata__Blume_in_eastern_Japan	https://doi.org/10.1080/17550874.2011.563759	Article	Toshie_Mizunuma	1	6	Botanical_Journal_of_Scotland	4	2011	female	School of GeoSciences, University of Edinburgh , Edinburgh, UK CorrespondenceToshie.Mizunuma@ed.ac.uk	UK	Europe	1,2	db	1	1	pos	db
CCS105	The_comparison_of_several_colour_indices_for_the_photographic_recording_of_canopy_phenology_of__Fagus_crenata__Blume_in_eastern_Japan	https://doi.org/10.1080/17550874.2011.563759	Article	John_Grace	2	6	Botanical_Journal_of_Scotland	4	2011	male	School of GeoSciences, University of Edinburgh , Edinburgh, UK CorrespondenceToshie.Mizunuma@ed.ac.uk	UK	Europe	1,2	db	1	1	pos	db
BSR	Spectral characteristics of pine needles at the limit of tree growth in subarctic Finland	https://www.tandfonline.com/doi/full/10.1080/17550874.2012.754512	Article	Sigrid Dengel	1	6	Botanical_Journal_of_Scotland	6	2013	female		Finland	Europe	2.64	db	3	3	pos	db
BSR	Spectral characteristics of pine needles at the limit of tree growth in subarctic Finland	https://www.tandfonline.com/doi/full/10.1080/17550874.2012.754512	Article	Toshie Mizunuma	2	6	Botanical_Journal_of_Scotland	6	2013	female		UK	Europe	2.64	db	3	3	pos	db
CCS	Dissolved organic carbon concentration and its relationship to electrical conductivity in the waters of a stream in a forested Amazonian blackwater catchment	10.1080/17550874.2013.820223	Research article	Maria T.F. Monteiro	1	6	Botanical_Journal_of_Scotland	7	2014	female	Instituto Nacional de Pesquisas da Amazônia , Manaus , Brazil	Brazil			db	4	4	pos	db
CCS	Dissolved organic carbon concentration and its relationship to electrical conductivity in the waters of a stream in a forested Amazonian blackwater catchment	10.1080/17550874.2013.820223	Research article	Javier Tomasella	2	6	Botanical_Journal_of_Scotland	7	2014	male	Instituto Nacional de Pesquisas da Amazônia , Manaus , Brazil ; Instituto Nacional de Pesquisas Espaciais , Sao Paulo , Brazil	Brazil			db	4	4	pos	db
CCS	Gap formation and carbon cycling in the Brazilian Amazon: measurement using high-resolution optical remote sensing and studies in large forest plots	10.1080/17550874.2013.795629	Research article	Cleber G. Oliveira	2	6	Botanical_Journal_of_Scotland	7	2014	male	Instituto Nacional de Pesquisas Espaciais , São José , dos Campos , Brasil	Brazil			db	4	4	pos	db
CCS	Gap formation and carbon cycling in the Brazilian Amazon: measurement using high-resolution optical remote sensing and studies in large forest plots	10.1080/17550874.2013.795629	Research article	Fernando D.B. Espírito-Santo	1	6	Botanical_Journal_of_Scotland	7	2014	male	Institute for the Study of Earth, Oceans and Space, Morse Hall, University of New Hampshire , Durham , NH , USA ; Jet Propulsion Laboratory, Radar Science and Engineering Section , Pasadena , CA , USA	USA			db	4	4	pos	db
LMDV32	Expanding_the_Global_Network_of_Protected_Areas_to_Save_the_Imperiled_Mediterranean_Biome_	https://doi.org/10.1111/j.1523-1739.2008.01072.xx	Contributed_papers	Emma_C_Underwood	1	6	Conservation_Biology	23	2009	female	University_of_California_at_Davis	USA	North_America	5.405	db	-5	-5	pre	sb
LMDV32	Expanding_the_Global_Network_of_Protected_Areas_to_Save_the_Imperiled_Mediterranean_Biome_	https://doi.org/10.1111/j.1523-1739.2008.01072.xx	Contributed_papers	M_Rebecca_Shaw	2	6	Conservation_Biology	23	2009	female	The_Nature_Conservancy	USA	North_America	5.405	db	-5	-5	pre	sb
LMDV85	Value_of_Semi‐Open_Corridors_for_Simultaneously_Connecting_Open_and_Wooded_Habitats:_a_Case_Study_with_Ground_Beetles_	https://doi.org/10.1111/j.1523-1739.2009.01295.xx	Contributed_papers	Britta_Eggers	1	6	Conservation_Biology	24	2010	female	Institute_of_Ecology_and_Environmental_Chemistry	Germany	Europe	5.405	db	-4	-4	pre	sb
LMDV85	Value_of_Semi‐Open_Corridors_for_Simultaneously_Connecting_Open_and_Wooded_Habitats:_a_Case_Study_with_Ground_Beetles_	https://doi.org/10.1111/j.1523-1739.2009.01295.xx	Contributed_papers	Thorsten_Assmann	2	6	Conservation_Biology	24	2010	male	Institute_of_Ecology_and_Environmental_Chemistry	Germany	Europe	5.405	db	-4	-4	pre	sb
LMDV76	Potential_Effects_of_the_United_States‐Mexico_Border_Fence_on_Wildlife_	https://doi.org/10.1111/j.1523-1739.2009.01277.x	Contributed_papers	Aaron_D_Flesch	1	6	Conservation_Biology	24	2010	male	University_of_Arizona	USA	North_America	5.405	db	-4	-4	pre	sb
LMDV76	Potential_Effects_of_the_United_States‐Mexico_Border_Fence_on_Wildlife_	https://doi.org/10.1111/j.1523-1739.2009.01277.x	Contributed_papers	John_R_Morgart	2	6	Conservation_Biology	24	2010	male	National_Wildlife_Refuge	USA	North_America	5.405	db	-4	-4	pre	sb
LMDV117	Effects_of_Postfire_Salvage_Logging_on_Deadwood‐Associated_Beetles_	https://doi.org/10.1111/j.1523-1739.2010.01566.x	Contributed_papers	_David_W_Langor	2	6	Conservation_Biology	25	2011	male	Canadian_Forest_Service	Canada	North_America	5.405	db	-3	-3	pre	sb
LMDV117	Effects_of_Postfire_Salvage_Logging_on_Deadwood‐Associated_Beetles_	https://doi.org/10.1111/j.1523-1739.2010.01566.x	Contributed_papers	Tyler_P_Cobb	1	6	Conservation_Biology	25	2011	male	Royal Alberta Museum	Canada	North_America	5.405	db	-3	-3	pre	sb
LMDV115	Effects_of_Harvesting_Flowers_from_Shrubs_on_the_Persistence_and_Abundance_of_Wild_Shrub_Populations_at_Multiple_Spatial_Extents_	https://doi.org/10.1111/j.1523-1739.2010.01628.x	Contributed_papers	Frank_M_Schurr	2	6	Conservation_Biology	25	2011	male	University of Potsdam	Germany	Europe	5.405	db	-3	-3	pre	sb
LMDV115	Effects_of_Harvesting_Flowers_from_Shrubs_on_the_Persistence_and_Abundance_of_Wild_Shrub_Populations_at_Multiple_Spatial_Extents_	https://doi.org/10.1111/j.1523-1739.2010.01628.x	Contributed_papers	Juliano_Sarmento_Cabral	1	6	Conservation_Biology	25	2011	male	University of Potsdam	Germany	Europe	5.405	db	-3	-3	pre	sb
LMDV122	Effects_of_Trophy_Hunting_on_Lion_and_Leopard_Populations_in_Tanzania_	https://doi.org/10.1111/j.1523-1739.2010.01576.x	Contributed_papers	Craig_Packer	1	6	Conservation_Biology	25	2011	male	University of Minnesota	USA	North_America	5.405	db	-3	-3	pre	sb
LMDV122	Effects_of_Trophy_Hunting_on_Lion_and_Leopard_Populations_in_Tanzania_	https://doi.org/10.1111/j.1523-1739.2010.01576.x	Contributed_papers	Tim_Caro	2	6	Conservation_Biology	25	2011	male	University_of_California_at_Davis	USA	North_America	5.405	db	-3	-3	pre	sb
LMDV134	Serious_New_Threat_to_Brazilian_Forests	https://doi.org/10.1111/j.1523-1739.2011.01798.x	Letter	William_F_Laurance	2	6	Conservation_Biology	26	2012	male	James_Cook_University	Australia	oceania	5.405	db	-2	-2	pre	sb
LMDV134	Serious_New_Threat_to_Brazilian_Forests	https://doi.org/10.1111/j.1523-1739.2011.01798.x	Letter	Alison_G_Nazareno	1	6	Conservation_Biology	26	2012	male	University of Santa Catarina	Brazil	South_America	5.405	db	-2	-2	pre	sb
LMDV154	Uncertain_Sightings_and_the_Extinction_of_the_Ivory-Billed_Woodpecker	https://doi.org/10.1111/j.1523-1739.2011.01743.x	Note	David_Roberts	2	6	Conservation_Biology	26	2012	male	University of Kent	UK	Europe	5.405	db	-2	-2	pre	sb
LMDV154	Uncertain_Sightings_and_the_Extinction_of_the_Ivory-Billed_Woodpecker	https://doi.org/10.1111/j.1523-1739.2011.01743.x	Note	Andrew_Solow	1	6	Conservation_Biology	26	2012	male	Woods Hole Oceanographic Institution	USA	North_America	5.405	db	-2	-2	pre	sb
LMDV182	Persistent_Unequal_Sex_Ratio_in_a_Population_of_Grayling_(Salmonidae)_and_Possible_Role_of_Temperature_Increase	https://doi.org/10.1111/j.1523-1739.2012.01909.x	Note	Claus_Wedekind	1	6	Conservation_Biology	27	2013	male	University of Lausanne	Switzerland	Europe	5.405	db	-1	-1	pre	sb
LMDV182	Persistent_Unequal_Sex_Ratio_in_a_Population_of_Grayling_(Salmonidae)_and_Possible_Role_of_Temperature_Increase	https://doi.org/10.1111/j.1523-1739.2012.01909.x	Note	Joachim_Guthruf	2	6	Conservation_Biology	27	2013	male	Aquatica	Switzerland	Europe	5.405	db	-1	-1	pre	sb
LMDV169	Lethal_Effects_of_Water_Quality_on_Threatened_California_Salamanders_but_Not_on_Co-Occurring_Hybrid_Salamanders	https://doi.org/10.1111/j.1523-1739.2012.01955.x	Contributed_papers	Maureen_E_Ryan	1	6	Conservation_Biology	27	2013	female	University_of_California_at_Davis	USA	North_America	5.405	db	-1	-1	pre	sb
LMDV169	Lethal_Effects_of_Water_Quality_on_Threatened_California_Salamanders_but_Not_on_Co-Occurring_Hybrid_Salamanders	https://doi.org/10.1111/j.1523-1739.2012.01955.x	Contributed_papers	H_Bradley_Shaffer	2	6	Conservation_Biology	27	2013	male	La Kretz Center for California Conservation Science	USA	North_America	5.405	db	-1	-1	pre	sb
LMDV273	Resolving_future_fire_management_conflicts_using_multicriteria_decision_making	https://doi.org/10.1111/cobi.12580	Contributed_papers	Don_Driscoll	1	6	Conservation_Biology	30	2016	male	National Environmental Research Program	Australia	Oceania	5.405	db	0	0	pos	db
LMDV273	Resolving_future_fire_management_conflicts_using_multicriteria_decision_making	https://doi.org/10.1111/cobi.12580	Contributed_papers	Owen_Price	2	6	Conservation_Biology	30	2016	male	University of Wollongon	Australia	oceania	5.405	db	0	0	pos	db
LMDV272	Synergies_and_trade-offs_in_achieving_global_biodiversity_targets	https://doi.org/10.1111/cobi.12559	Contributed_papers	Carlo_Rondinini	2	6	Conservation_Biology	30	2016	male	SapienzaUniversità di Roma	Italy	Europe	5.405	db	0	0	pos	db
LMDV272	Synergies_and_trade-offs_in_achieving_global_biodiversity_targets	https://doi.org/10.1111/cobi.12559	Contributed_papers	Moreno_Di_Marco	1	6	Conservation_Biology	30	2016	male	SapienzaUniversità di Roma	Italy	Europe	5.405	db	0	0	pos	db
LMDV290	Tropical_amphibians_in_shifting_thermal_landscapes_under_land-use_and_climate_change	https://doi.org/10.1111/cobi.12769	contributed_papers	Maureen_Donnely	2	6	Conservation_Biology	31	2017	female	Florida_International_University	USA	North_America	5.405	db	1	1	pos	db
LMDV294	Accounting_for_adaptive_capacity_and_uncertainty_in_assessments_of_speciesâ€™_climate-change_vulnerability	https://doi.org/10.1111/cobi.12764	contributed_papers	Alisa_Wade	1	6	Conservation_Biology	31	2017	female	University of Montana	USA	North_America	5.405	db	1	1	pos	db
LMDV290	Tropical_amphibians_in_shifting_thermal_landscapes_under_land-use_and_climate_change	https://doi.org/10.1111/cobi.12769	contributed_papers	Justin_Nowakowski	1	6	Conservation_Biology	31	2017	male	University of California, Davis	USA	North_America	5.405	db	1	1	pos	db
LMDV294	Accounting_for_adaptive_capacity_and_uncertainty_in_assessments_of_speciesâ€™_climate-change_vulnerability	https://doi.org/10.1111/cobi.12764	contributed_papers	Clint_Muhfield	2	6	Conservation_Biology	31	2017	male	University of Montana	USA	North_America	5.405	db	1	1	pos	db
LMDV329	Expanding_career_pathways_in_conservation_science	UR - https://doi.org/10.1111/cobi.12987	Diversity	Erika_Zavaleta	1	6	Conservation_Biology	32	2018	female	University of California	USA	North_America	5.405	db	2	2	pos	db
LMDV329	Expanding_career_pathways_in_conservation_science	UR - https://doi.org/10.1111/cobi.12987	Diversity	Brett_Dickson	2	6	Conservation_Biology	32	2018	male	Northern_Arizona_University	USA	North_America	5.405	db	2	2	pos	db
BSR	Effects of howler monkey reintroduction on ecological interactions and processes	https://conbio.onlinelibrary.wiley.com/doi/10.1111/cobi.13188	Essay	Luisa G	1	6	Conservation_Biology	33	2019	female		Brazil			db	3	3	pos	db
BSR	Effects of howler monkey reintroduction on ecological interactions and processes	https://conbio.onlinelibrary.wiley.com/doi/10.1111/cobi.13188	Essay	Alexandra P	2	6	Conservation_Biology	33	2019	female		Brazil			db	3	3	pos	db
CCS	Compliance with and ecosystem function of biodiversity offsets in North American and European freshwaters	https://doi.org/10.1111/cobi.13343	Review	Sebastian Theis	1	6	Conservation_Biology	34	2020	male		Canada			db	4	4	pos	db
CCS	Compliance with and ecosystem function of biodiversity offsets in North American and European freshwaters	https://doi.org/10.1111/cobi.13344	Review	Mark S. Poesch	2	6	Conservation_Biology	34	2020	male		Canada			db	4	4	pos	db
LFLL155	A_Policy‐Driven_Knowledge_Agenda_for_Global_Forest_and_Landscape_Restoration	https://doi.org/10.1111/conl.12220	Policy_Perspectives	Robin_L_Chazdon	1	6	Conservation_Letters	10	2017	female	University_of_Connecticut	USA	North_America	6.766	sb	1	-4		sb
LFLL155	A_Policy‐Driven_Knowledge_Agenda_for_Global_Forest_and_Landscape_Restoration	https://doi.org/10.1111/conl.12220	Policy_Perspectives	Chetan_Kumar	2	6	Conservation_Letters	10	2017	male	International_Union_for_the_Conservation_of_Nature	USA	North_America	6.766	sb	1	-4		sb
LFLL180	Neocolonial_Conservation:_Is_Moving_Rhinos_to_Australia_Conservation_or_Intellectual_Property_Loss	https://doi.org/10.1111/conl.12354	Policy_Perspectives	Stephen_T_Garnett	2	6	Conservation_Letters	11	2018	male	Charles_Darwin_University	Australia	Oceania	6.766	sb	2	-3		sb
LFLL170	Climatic_Disequilibrium_Threatens_Conservation_Priority_Forests	https://doi.org/10.1111/conl.12349	Letter	Andrew_J_Suggitt	2	6	Conservation_Letters	11	2018	male	University_of_Exeter	UK	Europe	6.766	sb	2	-3		sb
LFLL170	Climatic_Disequilibrium_Threatens_Conservation_Priority_Forests	https://doi.org/10.1111/conl.12349	Letter	Brian_Huntley	1	6	Conservation_Letters	11	2018	male	Durham_University	UK	Europe	6.766	sb	2	-3		sb
LFLL180	Neocolonial_Conservation:_Is_Moving_Rhinos_to_Australia_Conservation_or_Intellectual_Property_Loss	https://doi.org/10.1111/conl.12354	Policy_Perspectives	Matt_W_Hayward	1	6	Conservation_Letters	11	2018	male	Bangor_University	UK	Europe	6.766	sb	2	-3		sb
LFLL199	The_elephant_(head)_in_the_room:_A_critical_look_at_trophy_hunting	https://doi.org/10.1111/conl.12565	Policy_Perspectives	Arian_D_Wallach	2	6	Conservation_Letters	12	2019	female	University_of_Technology	Australia	Oceania	6.766	sb	3	-2		sb
LFLL196	Increasing_disturbance_demands_new_policies_to_conserve_intact_forest	https://doi.org/10.1111/conl.12449	Policy_Perspectives	David_B_Lindenmayer	2	6	Conservation_Letters	12	2019	male	The_Australian_National_University	Australia	Oceania	6.766	sb	3	-2		sb
LFLL195	Peace_in_Colombia_is_a_critical_moment_for_Neotropical_connectivity_and_conservation:_Save_the_northern_Andes–Amazon_biodiversity_bridge	https://doi.org/10.1111/conl.12594	Policy_Perspectives	Mauricio_Linares	2	6	Conservation_Letters	12	2019	male	Universidad_del_Rosario	Colombia	South_America	6.766	sb	3	-2		sb
LFLL195	Peace_in_Colombia_is_a_critical_moment_for_Neotropical_connectivity_and_conservation:_Save_the_northern_Andes–Amazon_biodiversity_bridge	https://doi.org/10.1111/conl.12594	Policy_Perspectives	Nicola_Clerici	1	6	Conservation_Letters	12	2019	male	Universidad_del_Rosario	Colombia	South_America	6.766	sb	3	-2		sb
LFLL196	Increasing_disturbance_demands_new_policies_to_conserve_intact_forest	https://doi.org/10.1111/conl.12449	Policy_Perspectives	Jörg_Müller	1	6	Conservation_Letters	12	2019	male	University_of_Würzburg	Germany	Europe	6.766	sb	3	-2		sb
LFLL199	The_elephant_(head)_in_the_room:_A_critical_look_at_trophy_hunting	https://doi.org/10.1111/conl.12565	Policy_Perspectives	Chelsea_Batavia	1	6	Conservation_Letters	12	2019	female	Oregon_State_University	USA	North_America	6.766	sb	3	-2		sb
LFLL214	Better_biodiversity_accounting_is_needed_to_prevent_bioperversity_and_maximize_co‐benefits_from_savanna_burning	https://doi.org/10.1111/conl.12685	Policy_Perspectives	Ben_Corey	1	6	Conservation_Letters	13	2020	male	Department_of_Biodiversity_Conservation_and_Attractions	Australia	Oceania	6.766	sb	4	-1		sb
LFLL214	Better_biodiversity_accounting_is_needed_to_prevent_bioperversity_and_maximize_co‐benefits_from_savanna_burning	https://doi.org/10.1111/conl.12685	Policy_Perspectives	Justin_J_Perry	2	6	Conservation_Letters	13	2020	male	CSIRO	Australia	Oceania	6.766	sb	4	-1		sb
LFLL208	Operationalizing_vulnerability_for_social–ecological_integration_in_conservation_and_natural_resource_management	https://doi.org/10.1111/conl.12677	Letter	Joachim_Claudet	2	6	Conservation_Letters	13	2020	male	PSL_Université_Paris	France	Europe	6.766	sb	4	-1		sb
LFLL208	Operationalizing_vulnerability_for_social–ecological_integration_in_conservation_and_natural_resource_management	https://doi.org/10.1111/conl.12677	Letter	Lauric_Thiault	1	6	Conservation_Letters	13	2020	male	PSL_Université_Paris	France	Europe	6.766	sb	4	-1		sb
LMDV399	A_new_agri-food_systems_sustainability_approach_to_identify_shared_transformation_pathways_towards_sustainability,	https://doi.org/10.1016/j.ecolecon.2016.08.019.	Research_article	Marianne_Hubeau	1	6	Ecological_Economics	131	2017	female	Institute for Agricultural and Fisheries Research	Belgium	Europe	4.482	sb	1	-4		sb
LMDV399	A_new_agri-food_systems_sustainability_approach_to_identify_shared_transformation_pathways_towards_sustainability,	https://doi.org/10.1016/j.ecolecon.2016.08.019.	Research_article	Guido_Van_Huylenbroeck	2	6	Ecological_Economics	131	2017	male	Ghent University	Belgium	Europe	4.482	sb	1	-4		sb
LMDV407	Climate_change_and_the_economy_in_Baja_California:_Assessment_of_macroeconomic_impacts_of_the_State's_Climate_Action_Plan,	https://doi.org/10.1016/j.ecolecon.2016.08.020.	analysis	Federico_MartÃ­nez	2	6	Ecological_Economics	131	2017	male	El Colegio de la Frontera Norte	Mexico	North_America	4.482	sb	1	-4		sb
LMDV407	Climate_change_and_the_economy_in_Baja_California:_Assessment_of_macroeconomic_impacts_of_the_State's_Climate_Action_Plan,	https://doi.org/10.1016/j.ecolecon.2016.08.020.	analysis	Dan_Wei	1	6	Ecological_Economics	131	2017	male	University of Southern California	USA	North_America	4.482	sb	1	-4		sb
LMDV466	Human_agency_in_the_Anthropocene	https://doi.org/10.1016/j.ecolecon.2019.106463	analysis	Ilona_Otto	1	6	Ecological_Economics	167	2020	female	Potsdam Institute for Climate Impact Research	Germany	Europe	4.482	sb	4	-1		sb
LMDV466	Human_agency_in_the_Anthropocene	https://doi.org/10.1016/j.ecolecon.2019.106463	analysis	Wolfgang_Lucht	2	6	Ecological_Economics	167	2020	male	Potsdam Institute for Climate Impact Research	Germany	Europe	4.482	sb	4	-1		sb
LMDV472	Exposure_to_green_areas:_Modelling_health_benefits_in_a_context_of_study_heterogeneity	https://doi.org/10.1016/j.ecolecon.2019.106401	Methodological_and_Ideological_Options	Aline_Chiabai	1	6	Ecological_Economics	167	2020	female	Basque Centre for Climate Change	Spain	Europe	4.482	sb	4	-1		sb
LMDV472	Exposure_to_green_areas:_Modelling_health_benefits_in_a_context_of_study_heterogeneity	https://doi.org/10.1016/j.ecolecon.2019.106401	Methodological_and_Ideological_Options	Tim_Taylor	2	6	Ecological_Economics	167	2020	male	University of Exeter Medical School	UK	Europe	4.482	sb	4	-1		sb
BSR16	Integrating_traditional_knowledge_when_it_appears_to_conflict_with_conservation:_lessons_from_the_discovery_and_protection_of_sitatunga_in_Ghana	http://dx.doi.org/10.5751/ES-08089-210124	Research_article	Jana_M._McPherson	1	6	Ecology_and_Society	21	2016	female	Calgary_Zoological_Society	Canada	North_America	3,89	db	0	0		db
BSR16	Integrating_traditional_knowledge_when_it_appears_to_conflict_with_conservation:_lessons_from_the_discovery_and_protection_of_sitatunga_in_Ghana	http://dx.doi.org/10.5751/ES-08089-210124	Research_article	Axel_Moehrenschlager	2	6	Ecology_and_Society	21	2016	male	Calgary_Zoological_Society	Canada	North_America	3,89	db	0	0		db
BSR25	Ways_of_farming_and_ways_of_thinking:_do_farmers’_mental_models_of_the_landscape_relate_to_their_land_management_practices?	http://dx.doi.org/10.5751/ES-08281-210135	Research_article	Carole_Vuillot	1	6	Ecology_and_Society	21	2016	female	Université_de_Montpellier	France	Europe	3,89	db	0	0		db
BSR25	Ways_of_farming_and_ways_of_thinking:_do_farmers’_mental_models_of_the_landscape_relate_to_their_land_management_practices?	http://dx.doi.org/10.5751/ES-08281-210135	Research_article	Annick_Gibon	2	6	Ecology_and_Society	21	2016	female	Université_de_Toulouse	France	Europe	3,89	db	0	0		db
BSR09	Climate_adaptation,_transitions,_and_socially_innovative_action-research_approaches	http://dx.doi.org/10.5751/ES-08059-210113	Research_article	Inês_S_Campos	1	6	Ecology_and_Society	21	2016	female	University_of_Lisbon	Portugal	Europe	3,89	db	0	0		db
BSR09	Climate_adaptation,_transitions,_and_socially_innovative_action-research_approaches	http://dx.doi.org/10.5751/ES-08059-210113	Research_article	Gil_Penha-Lopes	2	6	Ecology_and_Society	21	2016	male	University_of_Lisbon	Portugal	Europe	3,89	db	0	0		db
BSR02	Social_organization_influences_the_exchange_and_species_richness_of_medicinal_plants_in_Amazonian_homegardens	http://dx.doi.org/10.5751/ES-07944-210101	Research_article	Isabel_Díaz-Reviriego	1	6	Ecology_and_Society	21	2016	female	Universitat_Autònoma_de_Barcelona	Spain	Europe	3,89	db	0	0		db
BSR02	Social_organization_influences_the_exchange_and_species_richness_of_medicinal_plants_in_Amazonian_homegardens	http://dx.doi.org/10.5751/ES-07944-210101	Research_article	Victoria_Reyes-García	2	6	Ecology_and_Society	21	2016	female	Universitat_Autònoma_de_Barcelona	Spain	Europe	3,89	db	0	0		db
BSR03	Local_perceptions_as_a_guide_for_the_sustainable_management_of_natural_resources:_empirical_evidence_from_a_small-scale_society_in_Bolivian_Amazonia	http://dx.doi.org/10.5751/ES-08092-210102	Research_article	Victoria_Reyes-García	2	6	Ecology_and_Society	21	2016	female	Universitat_Autònoma_de_Barcelona	Spain	Europe	3,89	db	0	0		db
BSR03	Local_perceptions_as_a_guide_for_the_sustainable_management_of_natural_resources:_empirical_evidence_from_a_small-scale_society_in_Bolivian_Amazonia	http://dx.doi.org/10.5751/ES-08092-210102	Research_article	Álvaro_Fernández-Llamazares	1	6	Ecology_and_Society	21	2016	male	Universitat_Autònoma_de_Barcelona	Spain	Europe	3,89	db	0	0		db
BSR51	Learning_about_social-ecological_trade-offs	http://dx.doi.org/10.5751/ES-08920-220102	Research_article	Diego_Galafassi	1	6	Ecology_and_Society	22	2017	male	Stockholm_University	Sweden	Europe	3,89	db	1	1		db
BSR51	Learning_about_social-ecological_trade-offs	http://dx.doi.org/10.5751/ES-08920-220102	Research_article	Ioan_Fazey	2	6	Ecology_and_Society	22	2017	male	University_of_Dundee	UK	Europe	3,89	db	1	1		db
BSR118	Reimagining_large-scale_open-water_fisheries_governance_through_adaptive_comanagement_in_hilsa_shad_sanctuaries	http://dx.doi.org/10.5751/ES-09917-230126	Research_article	Martin_L_van_Brakel	1	6	Ecology_and_Society	23	2018	male		Bangladesh	ASIA	3,89	db	2	2		db
BSR118	Reimagining_large-scale_open-water_fisheries_governance_through_adaptive_comanagement_in_hilsa_shad_sanctuaries	http://dx.doi.org/10.5751/ES-09917-230126	Research_article	Md._Abdul_Wahab	2	6	Ecology_and_Society	23	2018	male	Bangladesh Agricultural University (BAU),	Bangladesh	ASIA	3,89	db	2	2		db
BSR110	How_can_integrated_valuation_of_ecosystem_services_help_understanding_and_steering_agroecological_transitions?	http://dx.doi.org/10.5751/ES-09843-230112	Research_article	Nicolas_Dendoncker	1	6	Ecology_and_Society	23	2018	male	University_of_Namur	Belgium	Europe	3,89	db	2	2		db
BSR110	How_can_integrated_valuation_of_ecosystem_services_help_understanding_and_steering_agroecological_transitions?	http://dx.doi.org/10.5751/ES-09843-230112	Research_article	Cecile_Barnaud	2	6	Ecology_and_Society	23	2018	female	Université_de_Toulouse	France	Europe	3,89	db	2	2		db
BSR135	The_plurality_of_values_in_sustainable_agriculture_models:_diverse_lock-in_and_coevolution_patterns	http://dx.doi.org/10.5751/ES-09881-230121	Insight	Gael_Plumecocq	1	6	Ecology_and_Society	23	2018	male	Université_de_Toulouse	France	Europe	3,89	db	2	2		db
BSR135	The_plurality_of_values_in_sustainable_agriculture_models:_diverse_lock-in_and_coevolution_patterns	http://dx.doi.org/10.5751/ES-09881-230121	Insight	Olivier_Therond	2	6	Ecology_and_Society	23	2018	male	Université_de_Lorraine	France	Europe	3,89	db	2	2		db
BSR113	Farmer_perceptions_of_plant–soil_interactions_can_affect_adoption_of_sustainable_management_practices_in_cocoa_agroforests:_a_case_study_from_Southeast_Sulawesi	http://dx.doi.org/10.5751/ES-09921-230118	Research_article	Ariani_C_Wartenberg	1	6	Ecology_and_Society	23	2018	female	Swiss_Federal_Institute_of_Technology	Switzerland	Europe	3,89	db	2	2		db
BSR113	Farmer_perceptions_of_plant–soil_interactions_can_affect_adoption_of_sustainable_management_practices_in_cocoa_agroforests:_a_case_study_from_Southeast_Sulawesi	http://dx.doi.org/10.5751/ES-09921-230118	Research_article	Johan_Six	2	6	Ecology_and_Society	23	2018	male	Swiss_Federal_Institute_of_Technology	Switzerland	Europe	3,89	db	2	2		db
BSR111	Supplying_the_wildlife_trade_as_a_livelihood_strategy_in_a_biodiversity_hotspot	http://dx.doi.org/10.5751/ES-09821-230113	Research_article	Freya_A._V._St._John	2	6	Ecology_and_Society	23	2018	female	University_of_Kent	UK	Europe	3,89	db	2	2		db
BSR111	Supplying_the_wildlife_trade_as_a_livelihood_strategy_in_a_biodiversity_hotspot	http://dx.doi.org/10.5751/ES-09821-230113	Research_article	Janine_E._Robinson	1	6	Ecology_and_Society	23	2018	female	University_of_Kent	UK	Europe	3,89	db	2	2		db
BSR147	Are_community_forests_a_viable_model_for_the_Democratic_Republic_of_Congo?	http://dx.doi.org/10.5751/ES-10672-240106	Research_article	Guillaume_Lescuyer	1	6	Ecology_and_Society	24	2019	male	Univ_Montpellier	France	Europe	3,89	db	3	3		db
BSR147	Are_community_forests_a_viable_model_for_the_Democratic_Republic_of_Congo?	http://dx.doi.org/10.5751/ES-10672-240106	Research_article	Paolo_Omar_Cerutti	2	6	Ecology_and_Society	24	2019	male	CIFOR	Kenya	Africa	3,89	db	3	3		db
BSR172	Policy_tools_to_address_scale_mismatches:_insights_from_U.S._forest_governance	http://dx.doi.org/10.5751/ES-10703-240121	Insight	Courtney_A._Schultz	1	6	Ecology_and_Society	24	2019	female	Colorado_State_University	USA	North_America	3,89	db	3	3		db
BSR172	Policy_tools_to_address_scale_mismatches:_insights_from_U.S._forest_governance	http://dx.doi.org/10.5751/ES-10703-240121	Insight	Heidi_R._Huber-Stearns	2	6	Ecology_and_Society	24	2019	female	University_of_Oregon	USA	North_America	3,89	db	3	3		db
BSR177	Indigenous_and_local_knowledge_in_sustainability_transformations_research:_a_literature_review	http://dx.doi.org/10.5751/ES-11305-250103	Research_article	Berta_Martín-López	2	6	Ecology_and_Society	25	2020	female	Leuphana_University	Germany	Europe	3,89	db	4	4		db
BSR177	Indigenous_and_local_knowledge_in_sustainability_transformations_research:_a_literature_review	http://dx.doi.org/10.5751/ES-11305-250103	Research_article	David_P._M._Lam	1	6	Ecology_and_Society	25	2020	male	Leuphana_University	Germany	Europe	3,89	db	4	4		db
BSR188	Assessing_vulnerability_of_subsistence_travel_to_effects_of_environmental_change_in_Interior_Alaska	http://dx.doi.org/10.5751/ES-11426-250120	Research_article	Helen_S._Cold	1	6	Ecology_and_Society	25	2020	female	University_of_Alaska_Fairbanks	USA	North_America	3,89	db	4	4		db
BSR188	Assessing_vulnerability_of_subsistence_travel_to_effects_of_environmental_change_in_Interior_Alaska	http://dx.doi.org/10.5751/ES-11426-250120	Research_article	Krista_M._Heeringa	2	6	Ecology_and_Society	25	2020	female	University_of_Alaska_Fairbanks	USA	North_America	3,89	db	4	4		db
LMDV13	Environmental_impacts_of_domestic_resource_extraction_in_China	https://doi.org/10.1080/20964129.2019.1577703	Special_Issue	Feng_Shi	2	6	Ecosystem_Health_and_Sustainability	5	2019	female	Qilu University of Technology	China	Asia	2.315	db	3	3		db
LMDV13	Environmental_impacts_of_domestic_resource_extraction_in_China	https://doi.org/10.1080/20964129.2019.1577703	Special_Issue	Shen_Zhao	1	6	Ecosystem_Health_and_Sustainability	5	2019	male	Northeastern University	China	Asia	2.315	db	3	3		db
LMDV21	_Ecological_risk_assessment_of_soil_cadmium_in_China’s_coastal_economic_development_zone:_a_meta-analysis	https://doi.org/10.1080/20964129.2020.1733921	Article	Yajuan_Shi	2	6	Ecosystem_Health_and_Sustainability	6	2020	female	Chinese_Academy_of_Sciences	China	Asia	2.315	db	4	4		db
LMDV21	_Ecological_risk_assessment_of_soil_cadmium_in_China’s_coastal_economic_development_zone:_a_meta-analysis	https://doi.org/10.1080/20964129.2020.1733921	Article	Mingxing_Sun	1	6	Ecosystem_Health_and_Sustainability	6	2020	male	Chinese_Academy_of_Sciences	China	Asia	2.315	db	4	4		db
LMDV502	Note_on_using_nuclear_28S_rDNA_for_sequencing_ancient_and_strongly_degraded_insect_DNA	https://doi.org/10.1111/ens.12242	Short_communication	Sebastian_Büsse	1	6	Entomological_Science	20	2017	male	Kiel University	Germany	Europe	1.074	sb	1	-4		sb
LMDV502	Note_on_using_nuclear_28S_rDNA_for_sequencing_ancient_and_strongly_degraded_insect_DNA	https://doi.org/10.1111/ens.12242	Short_communication	Thomas_Hörnschemeyer	2	6	Entomological_Science	20	2017	male	Georg‐August‐University Göttingen	Germany	Europe	1.074	sb	1	-4		sb
LMDV498	Geographical_distribution_of_morphological_abnormalities_and_wing_color_pattern_modifications_of_the_pale_grass_blue_butterfly_in_northeastern_Japan	https://doi.org/10.1111/ens.12233	Original_article	Joji_M_Otaki	2	6	Entomological_Science	20	2017	male	University of the Ryukyus	Japan	Asia	1.074	sb	1	-4		sb
LMDV498	Geographical_distribution_of_morphological_abnormalities_and_wing_color_pattern_modifications_of_the_pale_grass_blue_butterfly_in_northeastern_Japan	https://doi.org/10.1111/ens.12233	Original_article	Atsuki_Hiyama	1	6	Entomological_Science	20	2017	male	University of the Ryukyus	Japan	Asia	1.074	sb	1	-4		sb
LMDV505	A_solanum_beetle_on_a_fabaceous_weed:_Host_plant_generalization_and_specialization_are_two_sides_of_the_same_coin	https://doi.org/10.1111/ens.12251	Original_article	Haruo_Katakura	2	6	Entomological_Science	20	2017	male	Hokkaido University	Japan	Asia	1.074	sb	1	-4		sb
LMDV505	A_solanum_beetle_on_a_fabaceous_weed:_Host_plant_generalization_and_specialization_are_two_sides_of_the_same_coin	https://doi.org/10.1111/ens.12251	Original_article	Hideki_Ueno	1	6	Entomological_Science	20	2017	male	Niigata University	Japan	Asia	1.074	sb	1	-4		sb
LMDV516	Species‐dependent_microarchitectural_traits_of_iridescent_scales_in_the_triad_taxa_of_Ornithoptera_birdwing_butterflies	https://doi.org/10.1111/ens.12256	Original_article	Joji_M_Otaki	2	6	Entomological_Science	20	2017	male	Kanagawa University	Japan	Asia	1.074	sb	1	-4		sb
LMDV516	Species‐dependent_microarchitectural_traits_of_iridescent_scales_in_the_triad_taxa_of_Ornithoptera_birdwing_butterflies	https://doi.org/10.1111/ens.12256	Original_article	Makoto_Kazama	1	6	Entomological_Science	20	2017	male	Kanagawa University	Japan	Asia	1.074	sb	1	-4		sb
LMDV511	Host‐associated_divergence_in_the_activity_of_digestive_enzymes_in_two_populations_of_the_gypsy_moth_Lymantria_dispar_(Lepidoptera:_Erebidae)	https://doi.org/10.1111/ens.12250	Short_communication	Jelica_Lazarević	1	6	Entomological_Science	20	2017	female	University of Belgrade	Serbia	Europe	1.074	sb	1	-4		sb
LMDV511	Host‐associated_divergence_in_the_activity_of_digestive_enzymes_in_two_populations_of_the_gypsy_moth_Lymantria_dispar_(Lepidoptera:_Erebidae)	https://doi.org/10.1111/ens.12250	Short_communication	Biljana_Stojković	2	6	Entomological_Science	20	2017	female	University of Belgrade	Serbia	Europe	1.074	sb	1	-4		sb
LMDV558	Cytomolecular_analysis_of_the_male_sex_chromosome_of_Tropidacris_cristata_grandis_(Thunberg,_1824)_(Orthoptera:_Romaleidae)	https://doi.org/10.1111/ens.12338	Original_article	Joana_Nere_Cru_Baldissera	1	6	Entomological_Science	22	2019	female	Departamento de Biologia Geral, CCB, Universidade Estadual de Londrina (UEL), Londrina, Brazil	Brazil	South_America	1.074	sb	3	-2		sb
LMDV558	Cytomolecular_analysis_of_the_male_sex_chromosome_of_Tropidacris_cristata_grandis_(Thunberg,_1824)_(Orthoptera:_Romaleidae)	https://doi.org/10.1111/ens.12338	Original_article	Renata_da_Rosa	2	6	Entomological_Science	22	2019	female	Departamento de Biologia Geral, CCB, Universidade Estadual de Londrina (UEL), Londrina, Brazil	Brazil	South_America	1.074	sb	3	-2		sb
LMDV554	Isolation_and_characterization_of_α‐(1→3)‐glucan‐degrading_bacteria_from_the_gut_of_Diaperis_boleti_feeding_on_Laetiporus_sulphureus	https://doi.org/10.1111/ens.12332	Short_communication	Adrian_Wiater	1	6	Entomological_Science	22	2019	male	Department of Industrial Microbiology, Maria Curie‐Skłodowska University, Lublin, Poland	Poland	Europe	1.074	sb	3	-2		sb
LMDV554	Isolation_and_characterization_of_α‐(1→3)‐glucan‐degrading_bacteria_from_the_gut_of_Diaperis_boleti_feeding_on_Laetiporus_sulphureus	https://doi.org/10.1111/ens.12332	Short_communication	Janus_Szczodrak	2	6	Entomological_Science	22	2019	male	Department of Industrial Microbiology, Maria Curie‐Skłodowska University, Lublin, Poland	Poland	Europe	1.074	sb	3	-2		sb
LMDV556	Site‐specific_profiles_of_biochemical_properties_in_the_larval_digestive_tract_of_Japanese_rhinoceros_beetle,_Trypoxylus_dichotomus_(Coleoptera:_Scarabaeidae)	https://doi.org/10.1111/ens.12394	Original_article	Noriko_Wada	1	6	Entomological_Science	23	2020	female	Laboratory of Biotechnology and Science in Daily Life, Department of Bioscience in Daily Life, College of Bioresource Sciences, Nihon University, Kanagawa, Japan	Japan	Asia	1.074	sb	4	-1		sb
LMDV556	Site‐specific_profiles_of_biochemical_properties_in_the_larval_digestive_tract_of_Japanese_rhinoceros_beetle,_Trypoxylus_dichotomus_(Coleoptera:_Scarabaeidae)	https://doi.org/10.1111/ens.12394	Original_article	Hirosi_Anzai	2	6	Entomological_Science	23	2020	male	Laboratory of Biotechnology and Science in Daily Life, Department of Bioscience in Daily Life, College of Bioresource Sciences, Nihon University, Kanagawa, Japan	Japan	Asia	1.074	sb	4	-1		sb
LFLL220	Developmental_changes_and_novelties_in_ceratophryid_frogs	https://doi.org/10.1186/s13227-016-0043-9	Research_article	Marissa_Fabrezi	1	6	EvoDevo	7	2016	female	Instituto_de_Bio_y_Geociencias_CONICET	Argentina	South_America	2.146	sb	0	-5		sb
LFLL220	Developmental_changes_and_novelties_in_ceratophryid_frogs	https://doi.org/10.1186/s13227-016-0043-9	Research_article	Richard_J_Wassersug	2	6	EvoDevo	7	2016	male	Dalhousie_University	Canada	North_America	2.146	sb	0	-5		sb
LFLL217	Large-scale_gene_expression_study_in_the_ophiuroid_Amphiura_filiformis_provides_insights_into_evolution_of_gene_regulatory_networks	https://doi.org/10.1186/s13227-015-0039-x	Research_article	David_Viktor_Dylus	1	6	EvoDevo	7	2016	male	University_of_Lausanne	Switzerland	Europe	2.146	sb	0	-5		sb
LFLL217	Large-scale_gene_expression_study_in_the_ophiuroid_Amphiura_filiformis_provides_insights_into_evolution_of_gene_regulatory_networks	https://doi.org/10.1186/s13227-015-0039-x	Research_article	Paola_Oliveri	2	6	EvoDevo	7	2016	female	University_College_London	UK	Europe	2.146	sb	0	-5		sb
LFLL230	The_phenotypic_plasticity_of_developmental_modules	https://doi.org/10.1186/s13227-016-0053-7	Research_article	Aabha_I_Sharma	1	6	EvoDevo	7	2016	female	Northwestern_University_Feinberg_School_of_Medicine	USA	North_America	2.146	sb	0	-5		sb
LFLL227	Morphogenesis_and_morphometric_scaling_of_lung_airway_development_follows_phylogeny_in_chicken,_quail,_and_duck_embryos	https://doi.org/10.1186/s13227-016-0049-3	Short_research_article	Celeste_M_Nelson	2	6	EvoDevo	7	2016	female	Princeton_University	USA	North_America	2.146	sb	0	-5		sb
LFLL228	Conserved_expression_of_vertebrate_microvillar_gene_homologs_in_choanocytes_of_freshwater_sponges	https://doi.org/10.1186/s13227-016-0050-x	Research_article	Jesús_F_Peña	1	6	EvoDevo	7	2016	male	University_of_Denver	USA	North_America	2.146	sb	0	-5		sb
LFLL228	Conserved_expression_of_vertebrate_microvillar_gene_homologs_in_choanocytes_of_freshwater_sponges	https://doi.org/10.1186/s13227-016-0050-x	Research_article	Scott_A_Nichols	2	6	EvoDevo	7	2016	male	University_of_Denver	USA	North_America	2.146	sb	0	-5		sb
LFLL230	The_phenotypic_plasticity_of_developmental_modules	https://doi.org/10.1186/s13227-016-0053-7	Research_article	Yuichiro_Suzuki	2	6	EvoDevo	7	2016	male	Wellesley_College	USA	North_America	2.146	sb	0	-5		sb
LFLL227	Morphogenesis_and_morphometric_scaling_of_lung_airway_development_follows_phylogeny_in_chicken,_quail,_and_duck_embryos	https://doi.org/10.1186/s13227-016-0049-3	Short_research_article	Daniel_Tzou	1	6	EvoDevo	7	2016	male	Princeton_University	USA	North_America	2.146	sb	0	-5		sb
LFLL306	Unravelling_the_genes_forming_the_wing_pattern_supergene_in_the_polymorphic_butterfly_Heliconius_numata	https://doi.org/10.1186/s13227-019-0129-2	Research_article	Suzanne_V_Saenko	1	6	EvoDevo	10	2019	female	Sorbonne_Université	France	Europe	2.146	sb	3	-2		sb
LFLL306	Unravelling_the_genes_forming_the_wing_pattern_supergene_in_the_polymorphic_butterfly_Heliconius_numata	https://doi.org/10.1186/s13227-019-0129-2	Research_article	Violaine_Llaurens	2	6	EvoDevo	10	2019	female	Sorbonne_Université	France	Europe	2.146	sb	3	-2		sb
LFLL311	Comparative_transcriptomic_analysis_of_a_wing-dimorphic_stonefly_reveals_candidate_wing_loss_genes	https://doi.org/10.1186/s13227-019-0135-4	Research_article	Graham_A_McCulloch	1	6	EvoDevo	10	2019	male	University_of_Otago	New_Zealand	Oceania	2.146	sb	3	-2		sb
LFLL311	Comparative_transcriptomic_analysis_of_a_wing-dimorphic_stonefly_reveals_candidate_wing_loss_genes	https://doi.org/10.1186/s13227-019-0135-4	Research_article	Jonathan_M_Waters	2	6	EvoDevo	10	2019	male	University_of_Otago	New_Zealand	Oceania	2.146	sb	3	-2		sb
LFLL309	Conserved_gene_signalling_and_a_derived_patterning_mechanism_underlie_the_development_of_avian_footpad_scales	https://doi.org/10.1186/s13227-019-0130-9	Research_article	Gareth_J_Fraser	2	6	EvoDevo	10	2019	male	University_of_Sheffield	UK	Europe	2.146	sb	3	-2		sb
LFLL309	Conserved_gene_signalling_and_a_derived_patterning_mechanism_underlie_the_development_of_avian_footpad_scales	https://doi.org/10.1186/s13227-019-0130-9	Research_article	Rory_L_Cooper	1	6	EvoDevo	10	2019	male	University_of_Sheffield	UK	Europe	2.146	sb	3	-2		sb
LFLL308	Bar,_stripe_and_spot_development_in_sand-dwelling_cichlids_from_Lake_Malawi	https://doi.org/10.1186/s13227-019-0132-7	Research_article	Laura_A_Hendrick	1	6	EvoDevo	10	2019	female	University_of_North_Carolina	USA	North_America	2.146	sb	3	-2		sb
LFLL308	Bar,_stripe_and_spot_development_in_sand-dwelling_cichlids_from_Lake_Malawi	https://doi.org/10.1186/s13227-019-0132-7	Research_article	Pierre_Le_Pabic	2	6	EvoDevo	10	2019	male	University_of_North_Carolina	USA	North_America	2.146	sb	3	-2		sb
CCS466	Influences_of_sampling_effort_on_detected_patterns_and_structuring_processes_of_a_Neotropical_plant–hummingbird_network	https://doi.org/10.1111/1365-2656.12459	Research_article	Marlies_Sazima	2	6	Journal_of_Animal_Ecology	85	2016	female	Programa de Pós‐Graduação em Ecologia, Universidade Estadual de Campinas (Unicamp), Cx. Postal 6109, CEP 13083‐862 Campinas, SP, Brazil	Brazil	South_America	4.554	sb	0	-5		sb
CCS466	Influences_of_sampling_effort_on_detected_patterns_and_structuring_processes_of_a_Neotropical_plant–hummingbird_network	https://doi.org/10.1111/1365-2656.12459	Research_article	Jeferson_Vizentin‐Bugoni	1	6	Journal_of_Animal_Ecology	85	2016	male	Universidade Estadual de Campinas (Unicamp), Cx. Postal 6109, CEP 13083‐862 Campinas, SP, Brazil	Brazil	South_America	4.554	sb	0	-5		sb
CCS444	Can_habitat_selection_predict_abundance?	https://doi.org/10.1111/1365-2656.12359	Review	Mark_S_Boyce	1	6	Journal_of_Animal_Ecology	85	2016	male	Department of Biological Sciences, University of Alberta, Edmonton, AB, T6G 2E9 Canada	Canada	North_America	4.554	sb	0	-5		sb
CCS467	Community_structure_influences_species’_abundance_along_environmental_gradients	https://doi.org/10.1111/1365-2656.12461	Research_article	Anders_G_Finstad	2	6	Journal_of_Animal_Ecology	85	2016	male	Norwegian Institute for Nature Research (NINA), P.O. Box 5685 Sluppen, NO‐7485 Trondheim, Norway	Norway	Europe	4.554	sb	0	-5		sb
CCS467	Community_structure_influences_species’_abundance_along_environmental_gradients	https://doi.org/10.1111/1365-2656.12461	Research_article	Antti_P_Eloranta	1	6	Journal_of_Animal_Ecology	85	2016	male	Norwegian Institute for Nature Research (NINA), P.O. Box 5685 Sluppen, NO‐7485 Trondheim, Norway	Norway	Europe	4.554	sb	0	-5		sb
CCS444	Can_habitat_selection_predict_abundance?	https://doi.org/10.1111/1365-2656.12359	Review	Bram_van_Moorter	2	6	Journal_of_Animal_Ecology	85	2016	male	Norwegian Institute for Nature Research (NINA), Trondheim, 7485 Norway	Norway	Europe	4.554	sb	0	-5		sb
CCS453	Adaptive_strategies_in_nocturnally_migrating_insects_and_songbirds:_contrasting_responses_to_wind	https://doi.org/10.1111/1365-2656.12420	Research_article	Thomas_Alerstam	2	6	Journal_of_Animal_Ecology	85	2016	male	Department of Biology, Lund University, 223 62 Lund, Sweden	Sweden	Europe	4.554	sb	0	-5		sb
CCS453	Adaptive_strategies_in_nocturnally_migrating_insects_and_songbirds:_contrasting_responses_to_wind	https://doi.org/10.1111/1365-2656.12420	Research_article	Jason_W_Chapman	1	6	Journal_of_Animal_Ecology	85	2016	male	Department of AgroEcology, Rothamsted Research, Harpenden AL5 2JQ, UK	UK	Europe	4.554	sb	0	-5		sb
CCS449	What_is_the_animal_doing?_Tools_for_exploring_behavioural_structure_in_animal_movements	https://doi.org/10.1111/1365-2656.12379	Research_article	C_Michael_Wagner	2	6	Journal_of_Animal_Ecology	85	2016	male	Department of Fisheries and Wildlife, Michigan State University, East Lansing, MI, 48824 USA	USA	North_America	4.554	sb	0	-5		sb
CCS449	What_is_the_animal_doing?_Tools_for_exploring_behavioural_structure_in_animal_movements	https://doi.org/10.1111/1365-2656.12379	Research_article	Eliezer_Gurarie	1	6	Journal_of_Animal_Ecology	85	2016	male	Department of Biology, University of Maryland, College Park, MD, 20742 USA	USA	North_America	4.554	sb	0	-5		sb
CCS486	Shrub_encroachment_is_linked_to_extirpation_of_an_apex_predator	https://doi.org/10.1111/1365-2656.12607	Research_article	Christopher_E_Gordon	1	6	Journal_of_Animal_Ecology	86	2017	male	Hawkesbury Institute for the Environment, Western Sydney University, Penrith, NSW, 2751 Australia	Australia	Oceania	4.554	sb	1	-4		sb
CCS486	Shrub_encroachment_is_linked_to_extirpation_of_an_apex_predator	https://doi.org/10.1111/1365-2656.12607	Research_article	Mike_Letnic	2	6	Journal_of_Animal_Ecology	86	2017	male	Centre for Ecosystem Science, University of New South Wales, Sydney, NSW, 2052 Australia	Australia	Oceania	4.554	sb	1	-4		sb
CCS475	Hunting_promotes_sexual_conflict_in_brown_bears	https://doi.org/10.1111/1365-2656.12576	Research_article	Fanie_Pelletier	2	6	Journal_of_Animal_Ecology	86	2017	female	Département de Biologie, Université de Sherbrooke, 2500 boulevard de l'Université, Sherbrooke, QC, J1K 2R1 Canada	Canada	North_America	4.554	sb	1	-4		sb
CCS475	Hunting_promotes_sexual_conflict_in_brown_bears	https://doi.org/10.1111/1365-2656.12576	Research_article	Jacinthe_Gosselin	1	6	Journal_of_Animal_Ecology	86	2017	female	Département de Biologie, Université de Sherbrooke, 2500 boulevard de l'Université, Sherbrooke, QC, J1K 2R1 Canada	Canada	North_America	4.554	sb	1	-4		sb
CCS482	Sensitivity_of_UK_butterflies_to_local_climatic_extremes:_which_life_stages_are_most_at_risk?	https://doi.org/10.1111/1365-2656.12594	Research_article	Aldina_M_A_Franco	2	6	Journal_of_Animal_Ecology	86	2017	female	School of Environmental Sciences, University of East Anglia, Norwich Research Park, Norwich, NR4 7TJ UK	UK	Europe	4.554	sb	1	-4		sb
CCS482	Sensitivity_of_UK_butterflies_to_local_climatic_extremes:_which_life_stages_are_most_at_risk?	https://doi.org/10.1111/1365-2656.12594	Research_article	Osgur_McDermott_Long	1	6	Journal_of_Animal_Ecology	86	2017	male	School of Environmental Sciences, University of East Anglia, Norwich Research Park, Norwich, NR4 7TJ UK	UK	Europe	4.554	sb	1	-4		sb
CCS520	Genetic_and_environmental_contributions_to_the_impact_of_a_range‐expanding_predator_on_aquatic_ecosystems	https://doi.org/10.1111/1365-2656.12938	Research_article	Lieven_Therry	1	6	Journal_of_Animal_Ecology	88	2019	male	CNRS, Université Toulouse III Paul Sabatier, Station d’Écologie Théorique et Expérimentale, UMR‐5321, Moulis, France	France	Europe	4.554	sb	3	-2		sb
CCS520	Genetic_and_environmental_contributions_to_the_impact_of_a_range‐expanding_predator_on_aquatic_ecosystems	https://doi.org/10.1111/1365-2656.12938	Research_article	Simon_Blanchet	2	6	Journal_of_Animal_Ecology	88	2019	male	CNRS, Université Toulouse III Paul Sabatier, Station d’Écologie Théorique et Expérimentale, UMR‐5321, Moulis, France	France	Europe	4.554	sb	3	-2		sb
CCS527	Land‐use_change_alters_the_mechanisms_assembling_rainforest_mammal_communities_in_Borneo	https://doi.org/10.1111/1365-2656.12903	Research_article	Oliver_R_Wearn	1	6	Journal_of_Animal_Ecology	88	2019	male	Institute of Zoology, Zoological Society of London, London, UK	UK	Europe	4.554	sb	3	-2		sb
CCS527	Land‐use_change_alters_the_mechanisms_assembling_rainforest_mammal_communities_in_Borneo	https://doi.org/10.1111/1365-2656.12903	Research_article	Robert_M_Ewers	2	6	Journal_of_Animal_Ecology	88	2019	male	Department of Life Sciences, Imperial College London, Ascot, UK	UK	Europe	4.554	sb	3	-2		sb
CCS544	A_framework_to_estimate_the_likelihood_of_species_interactions_and_behavioural_responses_using_animal‐borne_acoustic_telemetry_transceivers_and_accelerometers	https://doi.org/10.1111/1365-2656.13156	Research_article	Amanda_N_Barkley	1	6	Journal_of_Animal_Ecology	89	2020	female	Department of Integrative Biology, University of Windsor, Windsor, ON, Canada	Canada	North_America	4.554	sb	4	-1		sb
CCS544	A_framework_to_estimate_the_likelihood_of_species_interactions_and_behavioural_responses_using_animal‐borne_acoustic_telemetry_transceivers_and_accelerometers	https://doi.org/10.1111/1365-2656.13156	Research_article	Nigel_E_Hussey	2	6	Journal_of_Animal_Ecology	89	2020	male	Department of Integrative Biology, University of Windsor, Windsor, ON, Canada	Canada	North_America	4.554	sb	4	-1		sb
CCS537	Movement_reveals_reproductive_tactics_in_male_elephants	https://doi.org/10.1111/1365-2656.13035	Research_article	Lucy_A_Taylor	1	6	Journal_of_Animal_Ecology	89	2020	female	Department of Zoology, University of Oxford, Oxford, UK	UK	Europe	4.554	sb	4	-1		sb
CCS538	Personality_predicts_foraging_site_fidelity_and_trip_repeatability_in_a_marine_predator	https://doi.org/10.1111/1365-2656.13106	Research_article	Samantha_C_Patrick	2	6	Journal_of_Animal_Ecology	89	2020	female	School of Environmental Sciences, University of Liverpool, Liverpool, UK	UK	Europe	4.554	sb	4	-1		sb
CCS538	Personality_predicts_foraging_site_fidelity_and_trip_repeatability_in_a_marine_predator	https://doi.org/10.1111/1365-2656.13106	Research_article	Stephanie_M_Harris	1	6	Journal_of_Animal_Ecology	89	2020	female	School of Environmental Sciences, University of Liverpool, Liverpool, UK	UK	Europe	4.554	sb	4	-1		sb
CCS537	Movement_reveals_reproductive_tactics_in_male_elephants	https://doi.org/10.1111/1365-2656.13035	Research_article	George_Wittemyer	2	6	Journal_of_Animal_Ecology	89	2020	male	University, Fort Collins, Colorado	USA	North_America	4.554	sb	4	-1		sb
CCS551	Navigating_through_the_r_packages_for_movement	https://doi.org/10.1111/1365-2656.13116	Review	Mathieu_Basille	2	6	Journal_of_Animal_Ecology	89	2020	male	Department of Wildlife Ecology and Conservation, Fort Lauderdale Research and Education Center, University of Florida, Fort Lauderdale, FL, USA	USA	North_America	4.554	sb	4	-1		sb
CCS551	Navigating_through_the_r_packages_for_movement	https://doi.org/10.1111/1365-2656.13116	Review	Rocío_Joo	1	6	Journal_of_Animal_Ecology	89	2020	male	Department of Wildlife Ecology and Conservation, Fort Lauderdale Research and Education Center, University of Florida, Fort Lauderdale, FL, USA	USA	North_America	4.554	sb	4	-1		sb
LFLL354	Using_abiotic_drivers_of_fish_spawning_to_inform_environmental_flow_management	https://doi.org/10.1111/1365-2664.12542	Research_article	Alison_J_King	1	6	Journal_of_Applied_Ecology	53	2016	female	Arthur_Rylah_Institute_for_Environmental_Research	Australia	Oceania	5,84	sb	0	-5		sb
LFLL354	Using_abiotic_drivers_of_fish_spawning_to_inform_environmental_flow_management	https://doi.org/10.1111/1365-2664.12542	Research_article	Leah_Beesley	2	6	Journal_of_Applied_Ecology	53	2016	female	Arthur_Rylah_Institute_for_Environmental_Research	Australia	Oceania	5,84	sb	0	-5		sb
LFLL372	Enriched_rearing_environment_and_wild_genetic_background_can_enhance_survival_and_disease_resistance_of_salmonid_fishes_during_parasite_epidemics	https://doi.org/10.1111/1365-2664.12568	Research_article	Anssi_Karvonen	1	6	Journal_of_Applied_Ecology	53	2016	male	University_of_Jyväskylä	Finland	Europe	5,84	sb	0	-5		sb
LFLL372	Enriched_rearing_environment_and_wild_genetic_background_can_enhance_survival_and_disease_resistance_of_salmonid_fishes_during_parasite_epidemics	https://doi.org/10.1111/1365-2664.12568	Research_article	Pekka_Hyvärinen	2	6	Journal_of_Applied_Ecology	53	2016	male	Natural_Resources_Institute_Finland	Finland	Europe	5,84	sb	0	-5		sb
LFLL356	Effects_of_seal_predation_on_a_modelled_marine_fish_community_and_consequences_for_a_commercial_fishery	https://doi.org/10.1111/1365-2664.12548	Research_article	Jennifer_E_Houle	1	6	Journal_of_Applied_Ecology	53	2016	female	Queen's_University_Belfast	UK	Europe	5,84	sb	0	-5		sb
LFLL356	Effects_of_seal_predation_on_a_modelled_marine_fish_community_and_consequences_for_a_commercial_fishery	https://doi.org/10.1111/1365-2664.12548	Research_article	David_G_Reid	2	6	Journal_of_Applied_Ecology	53	2016	male	Marine_Institute	UK	Europe	5,84	sb	0	-5		sb
LFLL366	Managing_Neotropical_oil_palm_expansion_to_retain_phylogenetic_diversity	https://doi.org/10.1111/1365-2664.12571	Research_article	David_P_Edwards	2	6	Journal_of_Applied_Ecology	53	2016	male	University_of_Sheffield	UK	Europe	5,84	sb	0	-5		sb
LFLL366	Managing_Neotropical_oil_palm_expansion_to_retain_phylogenetic_diversity	https://doi.org/10.1111/1365-2664.12571	Research_article	Graham_W_Prescott	1	6	Journal_of_Applied_Ecology	53	2016	male	University_of_Cambridge	UK	Europe	5,84	sb	0	-5		sb
LFLL355	Aquatic_pollution_increases_use_of_terrestrial_prey_subsidies_by_stream_fish	https://doi.org/10.1111/1365-2664.12543	Research_article	Johanna_M_Kraus	1	6	Journal_of_Applied_Ecology	53	2016	female	US_Geological_Survey	USA	North_America	5,84	sb	0	-5		sb
LFLL379	Grassland_birds_demonstrate_delayed_response_to_large‐scale_tree_removal_in_central_North_America	https://doi.org/10.1111/1365-2664.12554	Research_article	Sarah_J_Thompson	1	6	Journal_of_Applied_Ecology	53	2016	female	University_of_Minnesota	USA	North_America	5,84	sb	0	-5		sb
LFLL355	Aquatic_pollution_increases_use_of_terrestrial_prey_subsidies_by_stream_fish	https://doi.org/10.1111/1365-2664.12543	Research_article	Richard_B_Wanty	2	6	Journal_of_Applied_Ecology	53	2016	male	US_Geological_Survey	USA	North_America	5,84	sb	0	-5		sb
LFLL379	Grassland_birds_demonstrate_delayed_response_to_large‐scale_tree_removal_in_central_North_America	https://doi.org/10.1111/1365-2664.12554	Research_article	Nick_Palaia	2	6	Journal_of_Applied_Ecology	53	2016	male	US_Wish_and_Wildlife_Service	USA	North_America	5,84	sb	0	-5		sb
LFLL414	Supplementary_feeding_and_young_extraction_from_the_wild_are_not_a_sensible_alternative_to_captive_breeding_for_reintroducing_bearded_vultures_Gypaetus_barbatus	https://doi.org/10.1111/1365-2664.12541	Forum	Antoni_Margalida	1	6	Journal_of_Applied_Ecology	54	2017	male	University_of_Lleida	Spain	Europe	5,84	sb	1	-4		sb
LFLL414	Supplementary_feeding_and_young_extraction_from_the_wild_are_not_a_sensible_alternative_to_captive_breeding_for_reintroducing_bearded_vultures_Gypaetus_barbatus	https://doi.org/10.1111/1365-2664.12541	Forum	David_Serrano	2	6	Journal_of_Applied_Ecology	54	2017	male	Estación_Biológica_de_Doñana	Spain	Europe	5,84	sb	1	-4		sb
LFLL393	Phylogenetic_diversity_is_maintained_despite_richness_losses_over_time_in_restored_tallgrass_prairie_plant_communities	https://doi.org/10.1111/1365-2664.12639	Review	David_J_Gibson	2	6	Journal_of_Applied_Ecology	54	2017	male	Southern_Illinois_University	USA	North_America	5,84	sb	1	-4		sb
LFLL393	Phylogenetic_diversity_is_maintained_despite_richness_losses_over_time_in_restored_tallgrass_prairie_plant_communities	https://doi.org/10.1111/1365-2664.12639	Review	Nicholas_A_Barber	1	6	Journal_of_Applied_Ecology	54	2017	male	Northern_Illinois_University	USA	North_America	5,84	sb	1	-4		sb
LFLL428	Evaluating_the_success_of_wildlife_crossing_structures_using_genetic_approaches_and_an_experimental_design:_Lessons_from_a_gliding_mammal	https://doi.org/10.1111/1365-2664.12966	Research_article	Kylie_Soanes	1	6	Journal_of_Applied_Ecology	55	2018	female	University_of_Melbourne	Australia	Oceania	5,84	sb	2	-3		sb
LFLL428	Evaluating_the_success_of_wildlife_crossing_structures_using_genetic_approaches_and_an_experimental_design:_Lessons_from_a_gliding_mammal	https://doi.org/10.1111/1365-2664.12966	Research_article	Rodney_van_der_Ree	2	6	Journal_of_Applied_Ecology	55	2018	male	University_of_Melbourne	Australia	Oceania	5,84	sb	2	-3		sb
LFLL440	Compensatory_dynamics_maintain_bird_phylogenetic_diversity_in_fragmented_tropical_landscapes	https://doi.org/10.1111/1365-2664.12962	Research_article	Deborah_Faria	2	6	Journal_of_Applied_Ecology	55	2018	female	Universidade_Estadual_de_Santa_Cruz	Brazil	South_America	5,84	sb	2	-3		sb
LFLL440	Compensatory_dynamics_maintain_bird_phylogenetic_diversity_in_fragmented_tropical_landscapes	https://doi.org/10.1111/1365-2664.12962	Research_article	José_Carlos_Morante-Filho	1	6	Journal_of_Applied_Ecology	55	2018	male	Universidade_Estadual_de_Santa_Cruz	Brazil	South_America	5,84	sb	2	-3		sb
LFLL452	Relationships_between_forest_cover_and_fish_diversity_in_the_Amazon_River_floodplain	https://doi.org/10.1111/1365-2664.12967	Research_article	Carlos_EC_Freitas	2	6	Journal_of_Applied_Ecology	55	2018	male	Universidade_Federal_do_Amazonas	Brazil	South_America	5,84	sb	2	-3		sb
LFLL422	Farmer_perception_and_utilization_of_leaf_functional_traits_in_managing_agroecosystems	https://doi.org/10.1111/1365-2664.13027	Review	Marney_E_Isaac	1	6	Journal_of_Applied_Ecology	55	2018	female	University_of_Toronto	Canada	North_America	5,84	sb	2	-3		sb
LFLL418	Shifts_in_plant_functional_strategies_over_the_course_of_wheat_domestication	https://doi.org/10.1111/1365-2664.13029	Review	Agathe_Roucou	1	6	Journal_of_Applied_Ecology	55	2018	female	Université_de_Montpellier	France	Europe	5,84	sb	2	-3		sb
LFLL422	Farmer_perception_and_utilization_of_leaf_functional_traits_in_managing_agroecosystems	https://doi.org/10.1111/1365-2664.13027	Review	Nicole_Sibelet	2	6	Journal_of_Applied_Ecology	55	2018	female	Université_de_Montpellier	France	Europe	5,84	sb	2	-3		sb
LFLL418	Shifts_in_plant_functional_strategies_over_the_course_of_wheat_domestication	https://doi.org/10.1111/1365-2664.13029	Review	Denis_Vile	2	6	Journal_of_Applied_Ecology	55	2018	male	Université_de_Montpellier	France	Europe	5,84	sb	2	-3		sb
LFLL434	Managing_trap‐nesting_bees_as_crop_pollinators:_Spatiotemporal_effects_of_floral_resources_and_antagonists	https://doi.org/10.1111/1365-2664.12930	Research_article	Ingolf_Steffan-Dewenter	2	6	Journal_of_Applied_Ecology	55	2018	male	University_of_Würzburg	Germany	Europe	5,84	sb	2	-3		sb
LFLL434	Managing_trap‐nesting_bees_as_crop_pollinators:_Spatiotemporal_effects_of_floral_resources_and_antagonists	https://doi.org/10.1111/1365-2664.12930	Research_article	Matteo_Dainese	1	6	Journal_of_Applied_Ecology	55	2018	male	University_of_Würzburg	Germany	Europe	5,84	sb	2	-3		sb
LFLL438	Season_and_dominant_species_effects_on_plant_trait‐ecosystem_function_relationships_in_intensively_grazed_grassland	https://doi.org/10.1111/1365-2664.12939	Research_article	Kate_H_Orwin	1	6	Journal_of_Applied_Ecology	55	2018	female	Landcare_Research	New_Zealand	Oceania	5,84	sb	2	-3		sb
LFLL438	Season_and_dominant_species_effects_on_plant_trait‐ecosystem_function_relationships_in_intensively_grazed_grassland	https://doi.org/10.1111/1365-2664.12939	Research_article	Paul_L_Mudge	2	6	Journal_of_Applied_Ecology	55	2018	male	Landcare_Research	New_Zealand	Oceania	5,84	sb	2	-3		sb
LFLL437	Ecological_engineering_through_fire‐herbivory_feedbacks_drives_the_formation_of_savanna_grazing_lawns	https://doi.org/10.1111/1365-2664.12956	Research_article	Catherine_L_Parr	2	6	Journal_of_Applied_Ecology	55	2018	female	University_of_the_Witwatersrand	South_Africa	Africa	5,84	sb	2	-3		sb
LFLL437	Ecological_engineering_through_fire‐herbivory_feedbacks_drives_the_formation_of_savanna_grazing_lawns	https://doi.org/10.1111/1365-2664.12956	Research_article	Jason_E_Donaldson	1	6	Journal_of_Applied_Ecology	55	2018	male	University_of_the_Witwatersrand	South_Africa	Africa	5,84	sb	2	-3		sb
LFLL448	A_dynamical_model_for_invasive_round_goby_populations_reveals_efficient_and_effective_management_options	https://doi.org/10.1111/1365-2664.12934	Research_article	Anouk_N'Guyen	1	6	Journal_of_Applied_Ecology	55	2018	female	University_of_Basel	Switzerland	Europe	5,84	sb	2	-3		sb
LFLL448	A_dynamical_model_for_invasive_round_goby_populations_reveals_efficient_and_effective_management_options	https://doi.org/10.1111/1365-2664.12934	Research_article	Patricia_Burkhardt-Holm	2	6	Journal_of_Applied_Ecology	55	2018	female	University_of_Basel	Switzerland	Europe	5,84	sb	2	-3		sb
LFLL452	Relationships_between_forest_cover_and_fish_diversity_in_the_Amazon_River_floodplain	https://doi.org/10.1111/1365-2664.12967	Research_article	Caroline_C_Arantes	1	6	Journal_of_Applied_Ecology	55	2018	female	Texas_A&M_University	USA	North_America	5,84	sb	2	-3		sb
LFLL483	A_novel_approach_to_determining_dynamic_nitrogen_thresholds_for_seagrass_conservation	https://doi.org/10.1111/1365-2664.13252	Research_article	Karen_Rouse	2	6	Journal_of_Applied_Ecology	56	2019	female	SA_Water	Australia	Oceania	5,84	sb	3	-2		sb
LFLL483	A_novel_approach_to_determining_dynamic_nitrogen_thresholds_for_seagrass_conservation	https://doi.org/10.1111/1365-2664.13252	Research_article	Milena_B_Fernandes	1	6	Journal_of_Applied_Ecology	56	2019	female	SA_Water	Australia	Oceania	5,84	sb	3	-2		sb
LFLL463	Applying_ecological_knowledge_to_the_innovative_design_of_sustainable_agroecosystems	https://doi.org/10.1111/1365-2664.13173	Commentary	Elsa_T_Berthet	1	6	Journal_of_Applied_Ecology	56	2019	female	McGill_University	Canada	North_America	5,84	sb	3	-2		sb
LFLL463	Applying_ecological_knowledge_to_the_innovative_design_of_sustainable_agroecosystems	https://doi.org/10.1111/1365-2664.13173	Commentary	Blanche_Segrestin	2	6	Journal_of_Applied_Ecology	56	2019	female	PSL_Research_University	France	Europe	5,84	sb	3	-2		sb
LFLL472	Winter_cover_crop_legacy_effects_on_litter_decomposition_act_through_litter_quality_and_microbial_community_changes	https://doi.org/10.1111/1365-2664.13261	Research_article	Gerlinde_B_De_Deyn	2	6	Journal_of_Applied_Ecology	56	2019	female	Wageningen_University_&_Research	The_Netherlands	Europe	5,84	sb	3	-2		sb
LFLL472	Winter_cover_crop_legacy_effects_on_litter_decomposition_act_through_litter_quality_and_microbial_community_changes	https://doi.org/10.1111/1365-2664.13261	Research_article	Janna_M_Barel	1	6	Journal_of_Applied_Ecology	56	2019	female	Wageningen_University_&_Research	The_Netherlands	Europe	5,84	sb	3	-2		sb
LFLL489	Is_salvage_logging_effectively_dampening_bark_beetle_outbreaks_and_preserving_forest_carbon_stocks?	https://doi.org/10.1111/1365-2664.13518	Research_article	Rupert_Seidl	2	6	Journal_of_Applied_Ecology	57	2020	male	University_of_Natural_Resources_and_Life_Sciences	Austria	Europe	5,84	sb	4	-1		sb
LFLL489	Is_salvage_logging_effectively_dampening_bark_beetle_outbreaks_and_preserving_forest_carbon_stocks?	https://doi.org/10.1111/1365-2664.13518	Research_article	Laura_Dobor	1	6	Journal_of_Applied_Ecology	57	2020	female	Czech_University_of_Life_Sciences_Prague	Czech Republic	Europe	5,84	sb	4	-1		sb
MBS287	The_role_of_fire_and_a_long‐lived_soil_seed_bank_in_maintaining_persistence,_genetic_diversity_and_connectivity_in_a_fire‐prone_landscape	https://doi.org/10.1111/jbi.12601	Original_article	Donna_Bradbury	1	6	Journal_of_Biogeography	43	2016	female	Department_of_Parks_and_Wildlife	Australia	Oceania	3.723	sb	0	-5		sb
MBS287	The_role_of_fire_and_a_long‐lived_soil_seed_bank_in_maintaining_persistence,_genetic_diversity_and_connectivity_in_a_fire‐prone_landscape	https://doi.org/10.1111/jbi.12601	Original_article	Margaret_Byrne	2	6	Journal_of_Biogeography	43	2016	female	Department_of_Parks_and_Wildlife	Australia	Oceania	3.723	sb	0	-5		sb
MBS289	How_does_the_post‐fire_facultative_seeding_strategy_impact_genetic_variation_and_phylogeographical_history?_The_case_of_Bossiaea_ornata_(Fabaceae)_in_a_fire‐prone,_mediterranean‐climate_ecosystem	https://doi.org/10.1111/jbi.12615	Original_article	Donna_Bradbury	1	6	Journal_of_Biogeography	43	2016	female	Department_of_Parks_and_Wildlife	Australia	Oceania	3.723	sb	0	-5		sb
MBS289	How_does_the_post‐fire_facultative_seeding_strategy_impact_genetic_variation_and_phylogeographical_history?_The_case_of_Bossiaea_ornata_(Fabaceae)_in_a_fire‐prone,_mediterranean‐climate_ecosystem	https://doi.org/10.1111/jbi.12615	Original_article	Margaret_Byrne	2	6	Journal_of_Biogeography	43	2016	female	Department_of_Parks_and_Wildlife	Australia	Oceania	3.723	sb	0	-5		sb
MBS296	Evidence_for_multiple_founding_lineages_and_genetic_admixture_in_the_evolution_of_species_within_an_oceanic_island_weevil_(Coleoptera,_Curculionidae)_super‐radiation	https://doi.org/10.1111/jbi.12606	Original_article	Christiana_M_A_Faria	1	6	Journal_of_Biogeography	43	2016	female	University_of_East_Anglia	UK	Europe	3.723	sb	0	-5		sb
MBS296	Evidence_for_multiple_founding_lineages_and_genetic_admixture_in_the_evolution_of_species_within_an_oceanic_island_weevil_(Coleoptera,_Curculionidae)_super‐radiation	https://doi.org/10.1111/jbi.12606	Original_article	Brent_C_Emerson	2	6	Journal_of_Biogeography	43	2016	male	University_of_East_Anglia	UK	Europe	3.723	sb	0	-5		sb
MBS309	Realized_climatic_niches_are_conserved_along_maximum_temperatures_among_herpetofaunal_invaders	https://doi.org/10.1111/jbi.12808	Original_article	Xuan_Liu	1	6	Journal_of_Biogeography	44	2017	male	Chinese_Academy_of_Sciences	China	Asia	3.723	sb	1	-4		sb
MBS309	Realized_climatic_niches_are_conserved_along_maximum_temperatures_among_herpetofaunal_invaders	https://doi.org/10.1111/jbi.12808	Original_article	Yiming_Li	2	6	Journal_of_Biogeography	44	2017	male	Chinese_Academy_of_Sciences	China	Asia	3.723	sb	1	-4		sb
MBS302	Species_range_expansion_constrains_the_ecological_niches_of_resident_butterflies	https://doi.org/10.1111/jbi.12787	Original_article	Hélène_Audusseau	1	6	Journal_of_Biogeography	44	2017	female	Paris‐Est_Créteil_University	France	Europe	3.723	sb	1	-4		sb
MBS305	Metacommunity_structuring_in_Himalayan_streams_over_large_elevational_gradients:_the_role_of_dispersal_routes_and_niche_characteristics	https://doi.org/10.1111/jbi.12895	Original_article	Jonathan_D_Tonkin	1	6	Journal_of_Biogeography	44	2017	male	Senckenberg_Research_Institute_and_Natural_History_Museum_Frankfurt	Germany	Europe	3.723	sb	1	-4		sb
MBS305	Metacommunity_structuring_in_Himalayan_streams_over_large_elevational_gradients:_the_role_of_dispersal_routes_and_niche_characteristics	https://doi.org/10.1111/jbi.12895	Original_article	Steffen_U_Pauls	2	6	Journal_of_Biogeography	44	2017	male	Senckenberg_Biodiversity_and_Climate_Research_Institute	Germany	Europe	3.723	sb	1	-4		sb
MBS313	Historical_biogeography_of_Boraginales:_West_Gondwanan_vicariance_followed_by_long‐distance_dispersal?	https://doi.org/10.1111/jbi.12841	Original_article	Federico_Luebert	1	6	Journal_of_Biogeography	44	2017	male	University_of_Bonn	Germany	Europe	3.723	sb	1	-4		sb
MBS313	Historical_biogeography_of_Boraginales:_West_Gondwanan_vicariance_followed_by_long‐distance_dispersal?	https://doi.org/10.1111/jbi.12841	Original_article	Maximilian_Weigend	2	6	Journal_of_Biogeography	44	2017	male	University_of_Bonn	Germany	Europe	3.723	sb	1	-4		sb
MBS307	Favourable_areas_for_co‐occurrence_of_parapatric_species:_niche_conservatism_and_niche_divergence_in_Iberian_tree_frogs_and_midwife_toads	https://doi.org/10.1111/jbi.12850	Original_article	A_Márcia_Barbosa	2	6	Journal_of_Biogeography	44	2017	female	Universidade_de_Évora	Portugal	Europe	3.723	sb	1	-4		sb
MBS307	Favourable_areas_for_co‐occurrence_of_parapatric_species:_niche_conservatism_and_niche_divergence_in_Iberian_tree_frogs_and_midwife_toads	https://doi.org/10.1111/jbi.12850	Original_article	Luís_Reino	1	6	Journal_of_Biogeography	44	2017	male	Universidade_do_Porto	Portugal	Europe	3.723	sb	1	-4		sb
MBS302	Species_range_expansion_constrains_the_ecological_niches_of_resident_butterflies	https://doi.org/10.1111/jbi.12787	Original_article	Reto_Schmucki	2	6	Journal_of_Biogeography	44	2017	male	Natural_Environment_Research_Council	UK	Europe	3.723	sb	1	-4		sb
MBS340	Neotropical_savanna_ants_show_a_reversed_latitudinal_gradient_of_species_richness,_with_climatic_drivers_reflecting_the_forest_origin_of_the_fauna	https://doi.org/10.1111/jbi.13113	Original_article	Alan_N_Andersen	2	6	Journal_of_Biogeography	45	2018	male	Charles_Darwin_University	Australia	Oceania	3.723	sb	2	-3		sb
MBS335	Beyond_climate_control_on_species_range:_The_importance_of_soil_data_to_predict_distribution_of_Amazonian_plant_species	https://doi.org/10.1111/jbi.13104	Original_article	Flávia_R_C_Costa	2	6	Journal_of_Biogeography	45	2018	female	Instituto_Nacional_de_Pesquisas_da_Amazônia	Brazil	South_America	3.723	sb	2	-3		sb
MBS335	Beyond_climate_control_on_species_range:_The_importance_of_soil_data_to_predict_distribution_of_Amazonian_plant_species	https://doi.org/10.1111/jbi.13104	Original_article	Fernando_O_G_Figueiredo	1	6	Journal_of_Biogeography	45	2018	male	Instituto_Nacional_de_Pesquisas_da_Amazônia	Brazil	South_America	3.723	sb	2	-3		sb
MBS340	Neotropical_savanna_ants_show_a_reversed_latitudinal_gradient_of_species_richness,_with_climatic_drivers_reflecting_the_forest_origin_of_the_fauna	https://doi.org/10.1111/jbi.13113	Original_article	Heraldo_L_Vasconcelos	1	6	Journal_of_Biogeography	45	2018	male	Universidade_Federal_de_Uberlândia	Brazil	South_America	3.723	sb	2	-3		sb
MBS327	Complex_inter‐island_colonization_and_peripatric_founder_speciation_promote_diversification_of_flightless_Pachyrhynchus_weevils_in_the_Taiwan–Luzon_volcanic_belt	https://doi.org/10.1111/jbi.13110	Original_article	Hui‐Yun_Tseng	1	6	Journal_of_Biogeography	45	2018	female	National_Taiwan_Normal_University	Taiwan	Asia	3.723	sb	2	-3		sb
MBS327	Complex_inter‐island_colonization_and_peripatric_founder_speciation_promote_diversification_of_flightless_Pachyrhynchus_weevils_in_the_Taiwan–Luzon_volcanic_belt	https://doi.org/10.1111/jbi.13110	Original_article	Chung‐Ping_Lin	2	6	Journal_of_Biogeography	45	2018	male	National_Taiwan_Normal_University	Taiwan	Asia	3.723	sb	2	-3		sb
MBS352	The_role_of_competition_in_driving_species_global_distributions:_Soricid_shrews_as_a_case_study	https://doi.org/10.1111/jbi.13463	Original_article	Luís_Borda‐de‐Água	2	6	Journal_of_Biogeography	46	2019	male	Universidade_do_Porto	Portugal	Europe	3.723	sb	3	-2		sb
MBS352	The_role_of_competition_in_driving_species_global_distributions:_Soricid_shrews_as_a_case_study	https://doi.org/10.1111/jbi.13463	Original_article	Tomé_Neves	1	6	Journal_of_Biogeography	46	2019	male	Universidade_de_Lisboa	Portugal	Europe	3.723	sb	3	-2		sb
MBS378	The_Magellanic_Province_and_its_fish_fauna_(South_America):_Several_provinces_or_one?	https://doi.org/10.1111/jbi.13735	Original_article	Analía_Giussi	2	6	Journal_of_Biogeography	47	2020	female	Instituto_Nacional_de_Investigación_y_Desarrollo_Pesquero	Argentina	South_America	3.723	sb	4	-1		sb
MBS378	The_Magellanic_Province_and_its_fish_fauna_(South_America):_Several_provinces_or_one?	https://doi.org/10.1111/jbi.13735	Original_article	María_B_Cousseau	1	6	Journal_of_Biogeography	47	2020	female	Universidad_Nacional_de_Mar_del_Plata	Argentina	South_America	3.723	sb	4	-1		sb
MBS369	Testing_species_assemblage_predictions_from_stacked_and_joint_species_distribution_models	https://doi.org/10.1111/jbi.13608	Original_article	Damaris_Zurell	1	6	Journal_of_Biogeography	47	2020	female	Universität_zu_Berlin	Germany	Europe	3.723	sb	4	-1		sb
MBS383	Taxonomic_divergence_and_functional_convergence_in_Iberian_spider_forest_communities:_Insights_from_beta_diversity_partitioning	https://doi.org/10.1111/jbi.13722	Original_article	José_C_Carvalho	1	6	Journal_of_Biogeography	47	2020	male	University_of_Minho	Portugal	Europe	3.723	sb	4	-1		sb
MBS383	Taxonomic_divergence_and_functional_convergence_in_Iberian_spider_forest_communities:_Insights_from_beta_diversity_partitioning	https://doi.org/10.1111/jbi.13722	Original_article	Pedro_Cardoso	2	6	Journal_of_Biogeography	47	2020	male	University_of_Azores	Portugal	Europe	3.723	sb	4	-1		sb
MBS369	Testing_species_assemblage_predictions_from_stacked_and_joint_species_distribution_models	https://doi.org/10.1111/jbi.13608	Original_article	Rafael_O_Wüest	2	6	Journal_of_Biogeography	47	2020	male	Swiss_Federal_Research_Institute	Switzerland	Europe	3.723	sb	4	-1		sb
CCS	Possible glimpses into early speciation: the effect of ovarian fluid on sperm velocity accords with post-copulatory isolation between two guppy populations	/doi/10.1111/jeb.13194	Research Paper	J. P. Evans	2	6	Journal_of_evolutionary_biology	31	2018	male	Centre for Evolutionary Biology, School of Biological Sciences (M092), University of Western Australia, Crawley, WA, Australia	Australia	cont	2.541	db	0		pos	db
CCS	The tarnished silver spoon? Trade-off between prenatal growth and telomere length in wild boar	/doi/10.1111/jeb.13954	RESEARCH ARTICLE	Magdalena Spießberger	1	6	Journal_of_evolutionary_biology	35	2022	female	Department of Interdisciplinary Life Sciences, Research Institute of Wildlife Ecology, University of Veterinary Medicine, Vienna, Austria	Austria	Europe	2.541	db	4		pos	db
CCS	The tarnished silver spoon? Trade-off between prenatal growth and telomere length in wild boar	/doi/10.1111/jeb.13954	RESEARCH ARTICLE	Julia Nowack	2	6	Journal_of_evolutionary_biology	35	2022	female	Department of Interdisciplinary Life Sciences, Research Institute of Wildlife Ecology, University of Veterinary Medicine, Vienna, Austria	Austria	Europe	2.541	db	4		pos	db
[truncated: 4,375 more rows]
